# Supplementary material
Source: publisher figshare collection journal article supplement (https://rs.figshare.com/ndownloader/files/13001753)
Supplement: Supplementary file 1 [file 13001753]

## Sheet: CHIKV
Reaction ID	Flux Variability Analysis Host-Optimised Fluxes (mmol/gDW/h-1)			Flux Varability Analysis Virus-Optimised Fluxes (mmol/gDW/h-1)			Model Subsystem ID	Aggregate Subsystem[1]
	Minimum Flux (F-)	Maximum Flux (F+)	Median Flux Value (F+ - ((F+ - F-) / 2)	Minimum Flux (F-)	Maximum Flux (F+)	Median Flux Value (F+ - ((F+ - F-) / 2)
10FTHF5GLUtl	0	0.0821981	0.0410991	0	0.290353	0.145177	Transport, Lysosomal	Transport
10FTHF5GLUtm	0	0.0821981	0.0410991	0	0.290353	0.145177	Transport, Mitochondrial	Transport
10FTHF6GLUtl	0	0.0657585	0.0328792	0	0.232282	0.116141	Transport, Lysosomal	Transport
10FTHF6GLUtm	0	0.0657585	0.0328792	0	0.232282	0.116141	Transport, Mitochondrial	Transport
10FTHF7GLUtl	0	0.0547987	0.0273994	0	0.193569	0.0967844	Transport, Lysosomal	Transport
10FTHF7GLUtm	0	0.0547987	0.0273994	0	0.193569	0.0967844	Transport, Mitochondrial	Transport
10FTHFtl	-0.0821981	0	-0.0410991	-0.290353	0	-0.145177	Transport, Lysosomal	Transport
10FTHFtm	-0.12986	0.0821981	-0.0238308	-0.23476	0.290353	0.0277967	Transport, Mitochondrial	Transport
13DAMPPOX	0	0	0	0	0	0	beta-Alanine metabolism	Amino Acids
1a,24,25VITD2Hm	0	0	0	0	0	0	Vitamin D	Vitamins
1a,24,25VITD3Hm	0	0	0	0	0	0	Vitamin D	Vitamins
1a,25VITD2Hm	0	0	0	0	0	0	Vitamin D	Vitamins
1a,25VITD3Hm	0	0	0	0	0	0	Vitamin D	Vitamins
1MNCAMti	0	0	0	0	0	0	Transport, Extracellular	Transport
24,25DHVITD2t	0	0	0	0	0	0	Transport, Extracellular	Transport
24,25DHVITD2tm	0	0	0	0	0	0	Transport, Mitochondrial	Transport
24,25DHVITD3t	0	0.00486126	0.00243063	0	0.0169796	0.00848981	Transport, Extracellular	Transport
24,25DHVITD3tm	0	0.00486126	0.00243063	0	0.0169796	0.00848981	Transport, Mitochondrial	Transport
24,25VITD2Hm	0	0	0	0	0	0	Vitamin D	Vitamins
24,25VITD3Hm	0	0.00486126	0.00243063	0	0.0169796	0.00848981	Vitamin D	Vitamins
24NPHte	0	0	0	0	0	0	Transport, Extracellular	Transport
25HVITD2t	0	0	0	0	0	0	Transport, Extracellular	Transport
25HVITD2tin	0	0	0	0	0	0	Transport, Extracellular	Transport
25HVITD2tin-m	0	0	0	0	0	0	Transport, Mitochondrial	Transport
25HVITD2tm	0	0	0	0	0	0	Transport, Mitochondrial	Transport
25HVITD3t	0	0	0	0	0	0	Transport, Extracellular	Transport
25HVITD3tin	0	0	0	0	0	0	Transport, Extracellular	Transport
25HVITD3tin-m	0	0	0	0	0	0	Transport, Mitochondrial	Transport
25HVITD3tm	0	0	0	0	0	0	Transport, Mitochondrial	Transport
25VITD2Hm	0	0	0	0	0	0	Vitamin D	Vitamins
25VITD3Hm	0	0	0	0	0	0	Vitamin D	Vitamins
2DR1PP	0	0.0666697	0.0333349	0	0.247666	0.123833	Pyrimidine Catabolism	Nucleotides
2HBO	-0.00838558	0	-0.00419279	-0.00782529	0	-0.00391264	Propanoate Metabolism	FAS
2HBt2	-0.00838558	0	-0.00419279	-0.00782529	0	-0.00391264	Transport, Extracellular	Transport
2HCO3_NAt	0	0	0	0	0	0	Transport, Extracellular	Transport
2MCITt	0	0.00838558	0.00419279	0	0.00782529	0.00391264	Transport, Extracellular	Transport
2OXOADOXm	0	0	0	0	0	0	Lysine Metabolism	Amino Acids
2OXOADPTm	0	0	0	0	0	0	Tryptophan metabolism	Amino Acids
34DHPHAMT	0	0	0	0	0	0	Tyrosine metabolism	Amino Acids
34DHPLACOX	0	0	0	0	0	0	Tyrosine metabolism	Amino Acids
34DHPLACOX(NADP)	0	0	0	0	0	0	Tyrosine metabolism	Amino Acids
34HPLFM	0	0	0	0	0	0	Ubiquinone Biosynthesis	Vitamins
35CGMPtn	0	0.136997	0.0684984	0	0.483922	0.241961	Transport, Nuclear	Transport
3AIBt	0	0.000626959	0.00031348	0	0	0	Transport, Extracellular	Transport
3AIBTm	0	0.000626959	0.00031348	0	0	0	Valine, Leucine, and Isoleucine Metabolism	Amino Acids
3AIBtm	0	0.000626959	0.00031348	0	0	0	Valine, Leucine, and Isoleucine Metabolism	Amino Acids
3DPHBH1	0	0	0	0	0	0	Ubiquinone Biosynthesis	Vitamins
3DPHBH2	0	0	0	0	0	0	Ubiquinone Biosynthesis	Vitamins
3DSPHR	0.00019031	0.0821711	0.0411807	0	0.134203	0.0671014	Sphingolipid Metabolism	Lipids
3HAO	0	0	0	0	0	0	Tryptophan metabolism	Amino Acids
3HBCDm	0	0	0	0	0	0	Butanoate Metabolism	FAS
3HBCOAHLm	0	0.000626959	0.00031348	0	0	0	Valine, Leucine, and Isoleucine Metabolism	Amino Acids
3HCO3_NAt	0	0	0	0	0	0	Transport, Extracellular	Transport
3HLYTCL	0	0	0	0	0	0	Tyrosine metabolism	Amino Acids
3HPCOAHYD	0	0	0	0	0	0	beta-Alanine metabolism	Amino Acids
3HXKYNDCL	0	0	0	0	0	0	Tryptophan metabolism	Amino Acids
3HXKYNOXDA	0	0	0	0	0	0	Tryptophan metabolism	Amino Acids
3M4HDXPAC	0	0	0	0	0	0	Tyrosine metabolism	Amino Acids
3MLDAt	0	0.00584639	0.0029232	0	0.00585106	0.00292553	Transport, Extracellular	Transport
3MOBt2im	0	0	0	0	0	0	Transport, Mitochondrial	Transport
3MOPt2im	0	0	0	0	0	0	Transport, Mitochondrial	Transport
3MOX4HOXPGALDOX	0	0	0	0	0	0	Tyrosine metabolism	Amino Acids
3MOX4HOXPGALDOX(NADP)	0	0	0	0	0	0	Tyrosine metabolism	Amino Acids
3MOXTYROX	0	0	0	0	0	0	Tyrosine metabolism	Amino Acids
3NTD7l	0	0	0	0	0	0	Nucleic acid degradation	Nucleotides
3SALAASPm	0	0	0	0	0	0	Transport, Mitochondrial	Transport
3SALATAi	0	0	0	0	0	0	Cysteine Metabolism	Amino Acids
3SALATAim	0	0	0	0	0	0	Cysteine Metabolism	Amino Acids
41R1H2MAE12BOOX	0	0	0	0	0	0	Tyrosine metabolism	Amino Acids
41R2A1H12BOOX	0	0	0	0	0	0	Tyrosine metabolism	Amino Acids
42A12BOOX	0	0	0	0	0	0	Tyrosine metabolism	Amino Acids
4ABUTtm	0	0.088466	0.044233	0	0.219098	0.109549	Transport, Mitochondrial	Transport
4HBZCOAFm	0	0	0	0	0	0	Ubiquinone Biosynthesis	Vitamins
4HBZFm	0	0	0	0	0	0	Ubiquinone Biosynthesis	Vitamins
4HDEBRISOQUINEte	0	0	0	0	0	0	Transport, Extracellular	Transport
4HGLSDm	0	0	0	0	0	0	Arginine and Proline Metabolism	Amino Acids
4HOXPACDOX(NADP)	0	0	0	0	0.00178232	0.000891162	Tyrosine metabolism	Amino Acids
4MOPt2im	0	0	0	0	0	0	Transport, Mitochondrial	Transport
4MPTNLte	0	0	0	0	0	0	Transport, Extracellular	Transport
4MPTNLtm	0	0	0	0	0	0	Transport, Mitochondrial	Transport
4MPTNLtr	0	0	0	0	0	0	Transport, Endoplasmic Reticular	Transport
4NPHSFte	0	0	0	0	0	0	Transport, Extracellular	Transport
4NPHSULT	0	0	0	0	0	0	CYP Metabolism	UFAS
4NPHte	0	0	0	0	0	0	Transport, Extracellular	Transport
4PYRDX	0	0	0	0	0	0	Transport, Extracellular	Transport
5ADTSTSTERONEGLCte	0	0	0	0	0	0	Transport, Extracellular	Transport
5ADTSTSTERONEGLCtr	0	0	0	0	0	0	Transport, Endoplasmic Reticular	Transport
5ADTSTSTERONEte	0	0	0	0	0	0	Transport, Extracellular	Transport
5ADTSTSTERONEtr	0	0	0	0	0	0	Transport, Endoplasmic Reticular	Transport
5DHFtl	0	0.0821981	0.0410991	0	0.290353	0.145177	Transport, Lysosomal	Transport
5FTHFt2	0	0	0	0	0	0	Transport, Extracellular	Transport
5HLTDL	0	0.00811912	0.00405956	0	0.00851678	0.00425839	Tryptophan metabolism	Amino Acids
5HOXINDACTO2OX	0	0	0	0	0	0	Tryptophan metabolism	Amino Acids
5HOXINDACTOX	0	0	0	0	0	0	Tryptophan metabolism	Amino Acids
5HOXINDACTOXm	0	0	0	0	0	0	Tryptophan metabolism	Amino Acids
5HOXINOXDA	0	0	0	0	0	0	Tryptophan metabolism	Amino Acids
5HTRPDOX	0	0	0	0	0	0	Tryptophan metabolism	Amino Acids
5HTRPVESSEC	0	0.00270637	0.00135319	0	0.00283893	0.00141946	Transport, Extracellular	Transport
5HXKYNDCL	0	0	0	0	0	0	Tryptophan metabolism	Amino Acids
5HXKYNOXDA	0	0	0	0	0	0	Tryptophan metabolism	Amino Acids
5MTHFt	0	0	0	0	0	0	Transport, Extracellular	Transport
5MTHFt2	0	0	0	0	0	0	Transport, Extracellular	Transport
5THFtl	0	0.0821981	0.0410991	0	0.290353	0.145177	Transport, Lysosomal	Transport
5THFtm	0	0.0821981	0.0410991	0	0.290353	0.145177	Transport, Mitochondrial	Transport
6DHFtl	0	0.0657585	0.0328792	0	0.232282	0.116141	Transport, Lysosomal	Transport
6DHFtm	0	0.0657585	0.0328792	0	0.232282	0.116141	Transport, Mitochondrial	Transport
6HTSTSTERONEte	0	0	0	0	0	0	Transport, Extracellular	Transport
6THFtl	0	0.0657585	0.0328792	0	0.232282	0.116141	Transport, Lysosomal	Transport
6THFtm	0	0.0657585	0.0328792	0	0.232282	0.116141	Transport, Mitochondrial	Transport
7DHCHSTEROLtr	0	0.0054876	0.0027438	0	0.0190697	0.00953483	Transport, Endoplasmic Reticular	Transport
7DHFtl	0	0.0547987	0.0273994	0	0.193569	0.0967844	Transport, Lysosomal	Transport
7DHFtm	0	0.0547987	0.0273994	0	0.193569	0.0967844	Transport, Mitochondrial	Transport
7THFtl	0	0.0547987	0.0273994	0	0.193569	0.0967844	Transport, Lysosomal	Transport
7THFtm	0	0.0547987	0.0273994	0	0.193569	0.0967844	Transport, Mitochondrial	Transport
A_MANASE	0	0	0	0	0	0	N-Glycan Degradation	Glycosylation
A_MANASEly	0	0.0113377	0.00566884	0	0.0400487	0.0200244	N-Glycan Degradation	Glycosylation
A4GALTc	0	0	0	0	0	0	Sphingolipid Metabolism	Lipids
A4GALTg	0	0	0	0	0	0	Sphingolipid Metabolism	Lipids
AACOAT	-0.286367	0.274347	-0.00601	-0.664152	0.967844	0.151846	Propanoate Metabolism	FAS
ABO1g	0	0	0	0	0	0	Blood Group Biosynthesis	Heme
ABO2g	0	0	0	0	0	0	Blood Group Biosynthesis	Heme
ABO3g	0	0	0	0	0	0	Blood Group Biosynthesis	Heme
ABO4g	0	0	0	0	0	0	Blood Group Biosynthesis	Heme
ABO5g	0	0	0	0	0	0	Blood Group Biosynthesis	Heme
ABO6g	0	0	0	0	0	0	Blood Group Biosynthesis	Heme
ABO7g	0	0	0	0	0	0	Blood Group Biosynthesis	Heme
ABO8g	0	0	0	0	0	0	Blood Group Biosynthesis	Heme
ABO9g	0	0	0	0	0	0	Blood Group Biosynthesis	Heme
ABTArm	0	0.088466	0.044233	0	0.219098	0.109549	Glutamate metabolism	Amino Acids
ABTD	-0.071116	0	-0.035558	-0.263948	0	-0.131974	Pentose and Glucuronate Interconversions	Central Metabolism
ABTti	0	0.071116	0.035558	0	0.263948	0.131974	Transport, Extracellular	Transport
ABUTD	0	0.088466	0.044233	0	0.224095	0.112047	beta-Alanine metabolism	Amino Acids
ABUTt2r	0	0	0	0	0	0	Transport, Extracellular	Transport
ABUTt2rL	0	0	0	0	0	0	Transport, Lysosomal	Transport
ABUTt4(2)r	0	0	0	0	0	0	Transport, Extracellular	Transport
ACACT1	0	0.743713	0.371857	0	0.743713	0.371857	Cholesterol Metabolism	Steriods
ACACT10m	0	0	0	0	0	0	Valine, Leucine, and Isoleucine Metabolism	Amino Acids
ACACT1r	-1.01771	0.286367	-0.36567	-1.71156	0.664152	-0.523703	Tryptophan metabolism	Amino Acids
ACACT1rm	-0.267999	0.414542	0.0732713	-0.647422	1.11101	0.231794	Tryptophan metabolism	Amino Acids
ACACT1x	0	0	0	0	0	0	Cholesterol Metabolism	Steriods
ACACt2	-0.307198	0	-0.153599	-0.444193	0	-0.222096	Transport, Extracellular	Transport
ACACt2m	-0.379869	0.780072	0.200101	-1.07682	1.45559	0.189383	Transport, Mitochondrial	Transport
ACACT4p	0	0	0	0	0	0	Fatty Acid Metabolism	FAS
ACACT5p	0	0	0	0	0	0	Fatty Acid Metabolism	FAS
ACACT6p	0	0	0	0	0	0	Fatty Acid Metabolism	FAS
ACACT7p	0	0	0	0	0	0	Fatty Acid Metabolism	FAS
ACACT8p	0	0	0	0	0	0	Fatty Acid Metabolism	FAS
ACACT9p	0	0	0	0	0	0	Fatty Acid Metabolism	FAS
ACACtx	-0.565724	0	-0.282862	-1.28349	0	-0.641746	Transport, Peroxisomal	Transport
ACALDt	0	0	0	0	0	0	Transport, Extracellular	Transport
ACALDtm	0	0	0	0	0	0	Transport, Mitochondrial	Transport
ACALDtr	0	0	0	0	0	0	Transport, Endoplasmic Reticular	Transport
ACALDtx	0	0	0	0	0	0	Transport, Peroxisomal	Transport
ACCOAC	0	0.328792	0.164396	0	1.16141	0.580706	Fatty Acid Metabolism	FAS
ACCOACm	0	0.410991	0.205495	0	1.45177	0.725883	Fatty Acid Metabolism	FAS
ACCOAgt	0	0	0	0	0	0	Transport, Extracellular	Transport
ACCOAL	0	0	0	0	0	0	Propanoate Metabolism	FAS
ACCOALm	0	0	0	0	0	0	Propanoate Metabolism	FAS
ACCOAtn	0	0	0	0	0	0	Transport, Nuclear	Transport
ACCOAtr	0	0	0	0	0	0	Transport, Endoplasmic Reticular	Transport
ACETONEt2	-0.321398	0	-0.160699	-0.444193	0	-0.222096	Transport, Extracellular	Transport
ACETONEt2m	-0.321398	0	-0.160699	-0.444193	0	-0.222096	Transport, Mitochondrial	Transport
ACGAGBSIDEtg	0	0	0	0	0	0	Transport, Golgi Apparatus	Transport
ACGAGBSIDEtl	0	0	0	0	0	0	Transport, Lysosomal	Transport
ACGALFUCGALACGALFUC12GAL14ACGLCGALGLUSIDEte	0	0	0	0	0	0	Transport, Extracellular	Transport
ACGALFUCGALACGALFUC12GAL14ACGLCGALGLUSIDEtg	0	0	0	0	0	0	Transport, Golgi Apparatus	Transport
ACGALFUCGALACGALFUCGALACGLCGAL14ACGLCGALGLUSIDEte	0	0	0	0	0	0	Transport, Extracellular	Transport
ACGALFUCGALACGALFUCGALACGLCGAL14ACGLCGALGLUSIDEtg	0	0	0	0	0	0	Transport, Golgi Apparatus	Transport
ACGALtly	0	0	0	0	0	0	Transport, Lysosomal	Transport
ACGAM2E	0	0	0	0	0	0	Aminosugar Metabolism	Glycosylation
ACGAM6PSi	0	0.032142	0.016071	0	0.110759	0.0553797	Aminosugar Metabolism	Glycosylation
ACGAMK	0	0.0694701	0.0347351	0	0.229915	0.114957	Aminosugar Metabolism	Glycosylation
ACGAMPM	0	0.0694701	0.0347351	0	0.229915	0.114957	Aminosugar Metabolism	Glycosylation
ACGAMtly	0	0.0694701	0.0347351	0	0.229915	0.114957	Transport, Lysosomal	Transport
ACGPID	0	0	0	0	0	0	Glycosylphosphatidylinositol (GPI)-anchor biosynthesis	Glycosylation
ACHEe	0	0	0	0	0	0	Glycerophospholipid Metabolism	Lipids
ACHVESSEC	0	0	0	0	0	0	Transport, Extracellular	Transport
ACITL	0	0.552244	0.276122	0	1.20073	0.600363	Citric Acid Cycle	Central Metabolism
ACN13ACNGALGBSIDEte	0	0	0	0	0	0	Transport, Extracellular	Transport
ACN13ACNGALGBSIDEtg	0	0	0	0	0	0	Transport, Golgi Apparatus	Transport
ACN23ACNGALGBSIDEte	0	0	0	0	0	0	Transport, Extracellular	Transport
ACN23ACNGALGBSIDEtg	0	0	0	0	0	0	Transport, Golgi Apparatus	Transport
ACNACNGAL14ACGLCGALGLUSIDEte	0	0	0	0	0	0	Transport, Extracellular	Transport
ACNACNGAL14ACGLCGALGLUSIDEtg	0	0	0	0	0	0	Transport, Golgi Apparatus	Transport
ACNACNGALGBSIDEte	0	0	0	0	0	0	Transport, Extracellular	Transport
ACNACNGALGBSIDEtg	0	0	0	0	0	0	Transport, Golgi Apparatus	Transport
ACNAM9PL	0	0.164396	0.0821981	0	0.565491	0.282745	Aminosugar Metabolism	Glycosylation
ACNAM9PL2	0	0.0642839	0.032142	0	0.211952	0.105976	Aminosugar Metabolism	Glycosylation
ACNAMlt	-0.00756134	0	-0.00378067	-0.0267094	0	-0.0133547	Transport, Lysosomal	Transport
ACNAMPH	0	0.164396	0.0821981	0	0.565491	0.282745	Aminosugar Metabolism	Glycosylation
ACNAMtn	0	0.00749242	0.00374621	0	0.0264659	0.013233	Transport, Nuclear	Transport
ACNGALACGLCGAL14ACGLCGALGLUSIDEte	0	0	0	0	0	0	Transport, Extracellular	Transport
ACNGALACGLCGAL14ACGLCGALGLUSIDEtg	0	0	0	0	0	0	Transport, Golgi Apparatus	Transport
ACNMLr	0	0.164396	0.0821981	0	0.565491	0.282745	Aminosugar Metabolism	Glycosylation
ACOAD10m	0	0	0	0	0	0	Valine, Leucine, and Isoleucine Metabolism	Amino Acids
ACOAD1fm	0	0	0	0	0	0	Butanoate Metabolism	FAS
ACOAD8m	0	0.0205476	0.0102738	0	0.0280813	0.0140406	Valine, Leucine, and Isoleucine Metabolism	Amino Acids
ACOAD9m	0	0.000626959	0.00031348	0	0	0	Valine, Leucine, and Isoleucine Metabolism	Amino Acids
ACOAHi	0	0.281751	0.140876	0	0.788538	0.394269	Pyruvate Metabolism	Central Metabolism
ACOAO7p	0	0.205095	0.102547	0	0.598669	0.299334	Fatty Acid Metabolism	FAS
ACOATA	0	0	0	0	0	0	Fatty Acid Metabolism	FAS
ACODA	0	0	0	0	0	0	Urea cycle/amino group metabolism	Amino Acids
ACONT	0	0.821981	0.410991	0	2.83858	1.41929	Citric Acid Cycle	Central Metabolism
ACONTm	-0.792832	0.183149	-0.304841	-2.8316	0.308888	-1.26136	Citric Acid Cycle	Central Metabolism
ACOX22x	0	0	0	0	0	0	Bile Acid Biosynthesis	Steriods
ACOX2x	0	0	0	0	0	0	Bile Acid Biosynthesis	Steriods
ACP1(FMN)	0	0.328792	0.164396	0	1.16141	0.580706	Riboflavin Metabolism	Vitamins
ACRNtm	0	0.547987	0.273994	0	1.93569	0.967844	Transport, Mitochondrial	Transport
ACS	0	0.234852	0.117426	0	0.82958	0.41479	Glycolysis/Gluconeogenesis	Central Metabolism
ACS2	0	0	0	0	0	0	Propanoate Metabolism	FAS
ACSm	0	0.205495	0.102748	0	0.725883	0.362941	Glycolysis/Gluconeogenesis	Central Metabolism
ACt2m	0	0.205495	0.102748	0	0.725883	0.362941	Transport, Mitochondrial	Transport
ACt2r	-0.518135	0.164396	-0.176869	-0.883186	0.580706	-0.15124	Transport, Extracellular	Transport
ACtg	0	0	0	0	0	0	Transport, Golgi Apparatus	Transport
ACTLMO	0	0.0913312	0.0456656	0	0.299334	0.149667	Pyruvate Metabolism	Central Metabolism
ACTNMO	0	0.0861749	0.0430874	0	0.226294	0.113147	Pyruvate Metabolism	Central Metabolism
ACYP	0	0.328792	0.164396	0	1.16141	0.580706	Glycolysis/Gluconeogenesis	Central Metabolism
ADA	0	0.101372	0.0506862	0	0.306623	0.153312	Purine Catabolism	Nucleotides
ADAe	0	0.101372	0.0506862	0	0.306623	0.153312	Nucleotides	Nucleotides
ADCim	0	0.321398	0.160699	0	0.444193	0.222096	Propanoate Metabolism	FAS
ADEt	-0.0215302	0	-0.0107651	-0.0268406	0	-0.0134203	Transport, Extracellular	Transport
ADEtl	0	0	0	0	0	0	Transport, Lysosomal	Transport
ADHAPtx	0	0	0	0	0	0	Transport, Peroxisomal	Transport
ADK1	0.0855113	0.0625147	0.074013	0.15124	0.34469	0.247965	Nucleotides	Nucleotides
ADK1m	0	0	0	0	0	0	Nucleotides	Nucleotides
ADK3	-0.0234242	-0.00189399	-0.0126591	-0.0316794	-0.0701696	-0.0509245	Nucleotides	Nucleotides
ADK3m	0	0	0	0	0	0	Nucleotides	Nucleotides
ADKd	0	0.0197826	0.00989129	0	0.0268406	0.0134203	Nucleotides	Nucleotides
ADMDC	0	0	0	0	0	0	Arginine and Proline Metabolism	Amino Acids
ADNCYC	0	0.164396	0.0821981	0	0.580706	0.290353	Nucleotides	Nucleotides
ADNK1	0	0.331645	0.165822	0	1.16625	0.583125	Nucleotides	Nucleotides
ADNK1m	0	0.0274619	0.013731	0	0.0671014	0.0335507	Nucleotides	Nucleotides
ADNt	-0.00197491	0	-0.000987453	-0.0413493	0	-0.0206746	Transport, Extracellular	Transport
ADNt4	0	0	0	0	0	0	Transport, Extracellular	Transport
ADNt5	0	0	0	0	0	0	Transport, Extracellular	Transport
ADNtl	0	0	0	0	0	0	Transport, Lysosomal	Transport
ADNtm	0	0.0274619	0.013731	0	0.0671014	0.0335507	Transport, Mitochondrial	Transport
ADPGLC	0	0	0	0	0	0	Nucleotides	Nucleotides
ADPMAN	0	0	0	0	0	0	Nucleotides	Nucleotides
ADPRDP	0	0.109597	0.0547987	0	0.387137	0.193569	Nucleotides	Nucleotides
ADPRDPm	0	0	0	0	0	0	Nucleotides	Nucleotides
ADPRIBt	0	0	0	0	0	0	Transport, Extracellular	Transport
ADPT	0	0.165822	0.0829112	0	0.583125	0.291563	Salvage Pathway	Nucleotides
ADPtx	-0.108948	-0.0101708	-0.0595592	-0.343254	0	-0.171627	Transport, Peroxisomal	Transport
ADRNCOAtx	0	0	0	0	0	0	Transport, Peroxisomal	Transport
ADRNCPT1	0	0	0	0	0	0	Carnitine shuttle	FAS
ADRNCPT2	0	0	0	0	0	0	Carnitine shuttle	FAS
ADRNCRNt	0	0	0	0	0	0	Carnitine shuttle	FAS
ADRNLPVESSEC	0	0	0	0	0	0	Transport, Extracellular	Transport
ADRNt	0	0	0	0	0	0	Transport, Extracellular	Transport
ADSELK	0	0	0	0	0	0	Selenoamino acid metabolism	Amino Acids
ADSK	0	0.328792	0.164396	0	1.16141	0.580706	Nucleotides	Nucleotides
ADSL1	0.00189399	0.194127	0.0980104	0.00241735	0.58559	0.294004	Nucleotides	Nucleotides
ADSL2	0.00347723	0.03039	0.0169336	0.00483879	0.0383895	0.0216141	IMP Biosynthesis	Nucleotides
ADSS	0.00189399	0.194127	0.0980104	0.00241735	0.58559	0.294004	Nucleotides	Nucleotides
AFLATOXINte	0	0	0	0	0	0	Transport, Extracellular	Transport
AG13T10g	0	0	0	0	0	0	Keratan sulfate biosynthesis	Glycosylation
AG13T11g	0	0	0	0	0	0	Keratan sulfate biosynthesis	Glycosylation
AG13T12g	0	0	0	0	0	0	Keratan sulfate biosynthesis	Glycosylation
AG13T13g	0	0	0	0	0	0	Keratan sulfate biosynthesis	Glycosylation
AG13T14g	0	0	0	0	0	0	Keratan sulfate biosynthesis	Glycosylation
AG13T15g	0	0	0	0	0	0	Keratan sulfate biosynthesis	Glycosylation
AG13T16g	0	0	0	0	0	0	Keratan sulfate biosynthesis	Glycosylation
AG13T17g	0	0	0	0	0	0	Keratan sulfate biosynthesis	Glycosylation
AG13T18g	0	0	0	0	0	0	Keratan sulfate biosynthesis	Glycosylation
AG13T1g	0	0.00756134	0.00378067	0	0.0267094	0.0133547	Keratan sulfate biosynthesis	Glycosylation
AG13T2g	0	0.00756134	0.00378067	0	0.0267094	0.0133547	Keratan sulfate biosynthesis	Glycosylation
AG13T3g	0	0.00756134	0.00378067	0	0.0267094	0.0133547	Keratan sulfate biosynthesis	Glycosylation
AG13T4g	0	0	0	0	0	0	Keratan sulfate biosynthesis	Glycosylation
AG13T5g	0	0	0	0	0	0	Keratan sulfate biosynthesis	Glycosylation
AG13T6g	0	0	0	0	0	0	Keratan sulfate biosynthesis	Glycosylation
AG13T7g	0	0	0	0	0	0	Keratan sulfate biosynthesis	Glycosylation
AG13T8g	0	0	0	0	0	0	Keratan sulfate biosynthesis	Glycosylation
AG13T9g	0	0	0	0	0	0	Keratan sulfate biosynthesis	Glycosylation
AGLPC	0	0	0	0	0	0	Glycerophospholipid Metabolism	Lipids
AGLPED	0	0	0	0	0	0	Glycerophospholipid Metabolism	Lipids
AGLPET	0	0	0	0	0	0	Glycerophospholipid Metabolism	Lipids
AGLPH	0	0	0	0	0	0	Glycerophospholipid Metabolism	Lipids
AGLPR	0	0	0	0	0	0	Glycerophospholipid Metabolism	Lipids
AGLPT	0	0	0	0	0	0	Glycerophospholipid Metabolism	Lipids
AGMTm	0	0	0	0	0	0	Arginine and Proline Metabolism	Amino Acids
AGPAT1	0.00196336	0.147608	0.0747857	0	0	0	Triacylglycerol Synthesis	Lipids
AGPex	0	0	0	0	0	0	Transport, Peroxisomal	Transport
AGPRim	0	0	0	0	0	0	Urea cycle/amino group metabolism	Amino Acids
AGPSx	0	0	0	0	0	0	Glycerophospholipid Metabolism	Lipids
AHANDROSTANGLCte	0	0	0	0	0	0	Transport, Extracellular	Transport
AHANDROSTANGLCtr	0	0	0	0	0	0	Transport, Endoplasmic Reticular	Transport
AHC	0.0034326	0.0867121	0.0450723	0.00483797	0.291746	0.148292	Methionine Metabolism	Amino Acids
AHCYStn	0	0	0	0	0	0	Transport, Nuclear	Transport
AHCYStr	-0.0867121	0	-0.043356	-0.291746	0	-0.145873	Transport, Endoplasmic Reticular	Transport
AHEXASE2ly	0	0.0113377	0.00566884	0	0.0400487	0.0200244	N-Glycan Degradation	Glycosylation
AHEXASEly	0	0	0	0	0	0	N-Glycan Degradation	Glycosylation
AICART	0.00347723	0.03039	0.0169336	0.00483879	0.0383895	0.0216141	IMP Biosynthesis	Nucleotides
AIRCr	0.00347723	0.03039	0.0169336	0.00483879	0.0383895	0.0216141	IMP Biosynthesis	Nucleotides
AK2LGCHOLt	0	0.281751	0.140876	0	0.788538	0.394269	Transport, Extracellular	Transport
AKGDm	0	0.201454	0.100727	0	0.270378	0.135189	Citric Acid Cycle	Central Metabolism
AKGMALtm	-0.59204	0.17126	-0.21039	-1.56173	0.0671703	-0.747279	Transport, Mitochondrial	Transport
AKGt4_3	-0.215523	0	-0.107762	-0.297159	0	-0.148579	Transport, Extracellular	Transport
AKGtp	0	0	0	0	0	0	Transport, Peroxisomal	Transport
AKR1C41	0	0	0	0	0	0	Bile Acid Biosynthesis	Steriods
AKR1C42	0	0	0	0	0	0	Bile Acid Biosynthesis	Steriods
ALAASNNaEx	0	0	0	0	0	0	Transport, Extracellular	Transport
ALACYSNaEx	0	0	0	0	0	0	Transport, Extracellular	Transport
ALADGLNexR	0	0	0	0	0	0	Transport, Extracellular	Transport
ALADGLYexR	-0.0317661	0	-0.015883	0	0	0	Transport, Extracellular	Transport
ALAGLNexR	0	0	0	0	0	0	Transport, Extracellular	Transport
ALAGLNNaEx	0	0	0	0	0	0	Transport, Extracellular	Transport
ALAGLYexR	0	0	0	0	0	0	Transport, Extracellular	Transport
ALAR	0	0.1989	0.0994498	0	0.199407	0.0997033	Alanine and Aspartate Metabolism	Amino Acids
ALASERNaEx	0	0	0	0	0	0	Transport, Extracellular	Transport
ALASm	0	0	0	0	0	0	Glycine, Serine, and Threonine Metabolism	Amino Acids
ALAt2r	0	0	0	0	0	0	Transport, Extracellular	Transport
ALAt2rL	0	0	0	0	0	0	Transport, Lysosomal	Transport
ALAt4	0	0	0	0	0	0	Transport, Extracellular	Transport
ALATA_L	-0.209605	-0.0107053	-0.110155	-0.209605	-0.0101984	-0.109902	Glutamate metabolism	Amino Acids
ALATHRNaEx	0	0	0	0	0	0	Transport, Extracellular	Transport
ALAtN1	-0.0969951	0	-0.0484975	-0.119228	0	-0.0596141	Transport, Extracellular	Transport
ALCD1	-0.159658	0	-0.0798291	-0.452631	0	-0.226315	Miscellaneous	Misc
ALCD21_D	0	0	0	0	0	0	Pyruvate Metabolism	Central Metabolism
ALCD21_L	0	0	0	0	0	0	Pyruvate Metabolism	Central Metabolism
ALCD22_D	0	0	0	0	0	0	Pyruvate Metabolism	Central Metabolism
ALCD22_L	0	0	0	0	0.0503536	0.0251768	Pyruvate Metabolism	Central Metabolism
ALCD2yf	0	0	0	0	0	0	Glycolysis/Gluconeogenesis	Central Metabolism
ALDD20x	0	0	0	0	0	0	Tryptophan metabolism	Amino Acids
ALDD20xm	0	0	0	0	0	0	Tryptophan metabolism	Amino Acids
ALDD21	0	0	0	0	0	0	Fatty Acid Metabolism	FAS
ALDD2x	0	0	0	0	0	0	Glycolysis/Gluconeogenesis	Central Metabolism
ALDD2xm	0	0	0	0	0	0	Glycolysis/Gluconeogenesis	Central Metabolism
ALDD2y	0	0	0	0	0	0	Glycolysis/Gluconeogenesis	Central Metabolism
ALDSTRNte	0	0	0	0	0	0	Transport, Extracellular	Transport
ALKP	0	0	0	0	0	0	Glycerophospholipid Metabolism	Lipids
ALOX12	0	0	0	0	0	0	Eicosanoid Metabolism	UFAS
ALOX12R	0	0	0	0	0	0	Eicosanoid Metabolism	UFAS
ALOX15	0	0	0	0	0	0	Eicosanoid Metabolism	UFAS
ALOX5	0	0	0	0	0	0	Eicosanoid Metabolism	UFAS
ALOX52	0	0	0	0	0	0	Eicosanoid Metabolism	UFAS
ALR	0	0.164396	0.0821981	0	0.565491	0.282745	Glycine, Serine, and Threonine Metabolism	Amino Acids
ALR2	0	0	0	0	0	0	Pyruvate Metabolism	Central Metabolism
ALR3	0	0.0734082	0.0367041	0	0.0422828	0.0211414	Pyruvate Metabolism	Central Metabolism
AM6SAD	0	0	0	0	0	0	Tryptophan metabolism	Amino Acids
AMACR2p	0	0	0	0	0	0	Bile Acid Biosynthesis	Steriods
AMACR2r	0	0	0	0	0	0	Bile Acid Biosynthesis	Steriods
AMACRp	0	0	0	0	0	0	Bile Acid Biosynthesis	Steriods
AMACRr	0	0	0	0	0	0	Bile Acid Biosynthesis	Steriods
AMANK	0	0.164396	0.0821981	0	0.565491	0.282745	Aminosugar Metabolism	Glycosylation
AMCOXO	0	0	0	0	0	0	Tryptophan metabolism	Amino Acids
AMETr	0	0.0867121	0.043356	0	0.291746	0.145873	Transport, Endoplasmic Reticular	Transport
AMETt2m	0	0.0767128	0.0383564	0	0.258283	0.129141	Transport, Mitochondrial	Transport
AMETtn	0	0	0	0	0	0	Transport, Nuclear	Transport
AMPDA	0	0.192233	0.0961164	0	0.583173	0.291586	Nucleotides	Nucleotides
AMPTASECG	0	0.110179	0.0550894	0	0.38814	0.19407	Glutathione Metabolism	ROS
AMPTASECGe	0	0.110179	0.0550894	0	0.38814	0.19407	Glutathione Metabolism	ROS
AMPtp	0	0	0	0	0	0	Transport, Peroxisomal	Transport
AMPtr	0	0	0	0	0	0	Transport, Endoplasmic Reticular	Transport
AMY1e	0	0	0	0	0	0	Starch and Sucrose Metabolism	Glycogen
AMY2e	0	0	0	0	0	0	Starch and Sucrose Metabolism	Glycogen
ANDRSTRNGLCte	0	0	0	0	0	0	Transport, Extracellular	Transport
ANDRSTRNGLCtr	0	0	0	0	0	0	Transport, Endoplasmic Reticular	Transport
ANDRSTRNte	0	0	0	0	0	0	Transport, Extracellular	Transport
ANDRSTRNtr	0	0	0	0	0	0	Transport, Endoplasmic Reticular	Transport
AP4AH1	0	0	0	0	0	0	Nucleotides	Nucleotides
APAT2rm	0	0	0	0	0	0	beta-Alanine metabolism	Amino Acids
APRTO2	0	0	0	0	0	0	Arginine and Proline Metabolism	Amino Acids
AQCOBALt	0	0	0	0	0	0	Transport, Extracellular	Transport
ARAB-Lt	0	0	0	0	0	0	Transport, Extracellular	Transport
ARABR	0	0	0	0	0	0	Pentose and Glucuronate Interconversions	Central Metabolism
ARACHCOAtx	0	0	0	0	0	0	Transport, Peroxisomal	Transport
ARACHCPT1	0	0	0	0	0	0	Carnitine shuttle	FAS
ARACHCPT2	0	0	0	0	0	0	Carnitine shuttle	FAS
ARACHCRNt	0	0	0	0	0	0	Carnitine shuttle	FAS
ARACHDCOAtx	0	0	0	0	0	0	Transport, Peroxisomal	Transport
ARACHDt2	0	0	0	0	0	0	Transport, Extracellular	Transport
ARACHDtr	0	0	0	0	0	0	Transport, Endoplasmic Reticular	Transport
ARACHt	0	0	0	0	0	0	Transport, Extracellular	Transport
ARGDCm	0	0	0	0	0	0	Arginine and Proline Metabolism	Amino Acids
ARGLYSex	0	0.02375	0.011875	0	0.02375	0.011875	Transport, Extracellular	Transport
ARGN	0	0.0687824	0.0343912	0	0.0851923	0.0425961	Urea cycle/amino group metabolism	Amino Acids
ARGNm	0	0.0687824	0.0343912	0	0.0851923	0.0425961	Urea cycle/amino group metabolism	Amino Acids
ARGSL	0	0.0608228	0.0304114	0	0.122391	0.0611955	Alanine and Aspartate Metabolism	Amino Acids
ARGSS	0	0.0608228	0.0304114	0	0.122391	0.0611955	Alanine and Aspartate Metabolism	Amino Acids
ARGt4	0	0.02375	0.011875	0	0.02375	0.011875	Transport, Extracellular	Transport
ARGtiDF	0	0.02375	0.011875	0	0.02375	0.011875	Transport, Extracellular	Transport
ARGtm	0	0.0687824	0.0343912	0	0.0851923	0.0425961	Transport, Mitochondrial	Transport
ARSA	0	0	0	0	0	0	Sphingolipid Metabolism	Lipids
ARTCOAL1	-0.169891	0.000561625	-0.0846646	-0.258991	0	-0.129495	R Group Synthesis	Central Metabolism
ARTCOAL2	-0.170022	0	-0.0850109	-0.258991	0	-0.129495	R Group Synthesis	Central Metabolism
ARTCOAL3	-0.170022	0	-0.0850109	-0.258991	0	-0.129495	R Group Synthesis	Central Metabolism
ARTFR11	0	0	0	0	0	0	R Group Synthesis	Central Metabolism
ARTFR12	0	0.102547	0.0512737	0	0.299334	0.149667	R Group Synthesis	Central Metabolism
ARTFR13	0	0.0891302	0.0445651	0	0.153544	0.0767719	R Group Synthesis	Central Metabolism
ARTFR202	0	0	0	0	0	0	R Group Synthesis	Central Metabolism
ARTFR203	0	0	0	0	0	0	R Group Synthesis	Central Metabolism
ARTFR204	0	0	0	0	0	0	R Group Synthesis	Central Metabolism
ARTFR205	0	0	0	0	0	0	R Group Synthesis	Central Metabolism
ARTFR206	0	0	0	0	0	0	R Group Synthesis	Central Metabolism
ARTFR207	0	0	0	0	0	0	R Group Synthesis	Central Metabolism
ARTFR208	0	0	0	0	0	0	R Group Synthesis	Central Metabolism
ARTFR209	0	0	0	0	0	0	R Group Synthesis	Central Metabolism
ARTFR210	0	0	0	0	0	0	R Group Synthesis	Central Metabolism
ARTFR211	0	0	0	0	0	0	R Group Synthesis	Central Metabolism
ARTFR212	0	0	0	0	0	0	R Group Synthesis	Central Metabolism
ARTFR213	0	0	0	0	0	0	R Group Synthesis	Central Metabolism
ARTFR31	0	0.0861442	0.0430721	0	0.152736	0.076368	R Group Synthesis	Central Metabolism
ARTFR32	0	0.0588061	0.029403	0	0.130644	0.0653221	R Group Synthesis	Central Metabolism
ARTFR33	0	0.0488447	0.0244223	0	0.126701	0.0633507	R Group Synthesis	Central Metabolism
ARTFR34	0	0.0410373	0.0205187	0	0.111618	0.0558092	R Group Synthesis	Central Metabolism
ARTFR41	0	0.102547	0.0512737	0	0.299334	0.149667	R Group Synthesis	Central Metabolism
ARTFR42	0	0.0588061	0.029403	0	0.130644	0.0653221	R Group Synthesis	Central Metabolism
ARTFR43	0	0.0488447	0.0244223	0	0.126701	0.0633507	R Group Synthesis	Central Metabolism
ARTFR44	0	0.0410373	0.0205187	0	0.111618	0.0558092	R Group Synthesis	Central Metabolism
ARTFR45	0	0	0	0	0	0	R Group Synthesis	Central Metabolism
ARTFR46	0	0.0488447	0.0244223	0	0.126701	0.0633507	R Group Synthesis	Central Metabolism
ARTFR61	0	0.205095	0.102547	0	0.598669	0.299334	R Group Synthesis	Central Metabolism
ARTPLM1	-0.0837526	0.207486	0.0618669	-0.152736	0.66722	0.257242	R Group Synthesis	Central Metabolism
ARTPLM1m	0	0.0740729	0.0370364	0	0.130718	0.0653591	R Group Synthesis	Central Metabolism
ARTPLM2	-0.172867	-0.00196336	-0.087415	-0.272255	0	-0.136127	R Group Synthesis	Central Metabolism
ARTPLM2m	0	0.0740729	0.0370364	0	0.130718	0.0653591	R Group Synthesis	Central Metabolism
ARTPLM3	-0.170977	-7.40336e-05	-0.0855257	-0.272255	0	-0.136127	R Group Synthesis	Central Metabolism
ARTPLM3m	0	0.0740729	0.0370364	0	0.130718	0.0653591	R Group Synthesis	Central Metabolism
ASAH1	0	0.0320723	0.0160361	0	0.105342	0.0526712	Sphingolipid Metabolism	Lipids
ASCBOX	0	0.410991	0.205495	0	0.603508	0.301754	Ascorbate and Aldarate Metabolism	Vitamins
ASCBt	0	0	0	0	0	0	Transport, Extracellular	Transport
ASCBt4	0	0	0	0	0	0	Transport, Extracellular	Transport
Asn-X-Ser/Thrtr	-0.0113377	0	-0.00566884	-0.0400487	0	-0.0200244	Transport, Endoplasmic Reticular	Transport
ASNALANaEx	0	0	0	0	0	0	Transport, Extracellular	Transport
ASNCYSNaEx	0	0	0	0	0	0	Transport, Extracellular	Transport
ASNGLNNaEx	0	0	0	0	0	0	Transport, Extracellular	Transport
ASNNm	0	0.101104	0.050552	0	0.28959	0.144795	Alanine and Aspartate Metabolism	Amino Acids
ASNS1	0.00581505	0.107151	0.0564829	0.00534043	0.29493	0.150135	Alanine and Aspartate Metabolism	Amino Acids
ASNSERNaEx	0	0	0	0	0	0	Transport, Extracellular	Transport
ASNt4	0	0	0	0	0	0	Transport, Extracellular	Transport
ASNTHRNaEx	0	0	0	0	0	0	Transport, Extracellular	Transport
ASNtm	0	0.101104	0.050552	0	0.28959	0.144795	Transport, Mitochondrial	Transport
ASNtN1	-0.0232501	0	-0.011625	-0.0400932	0	-0.0200466	Transport, Extracellular	Transport
ASPCTr	0.00336987	0.0571578	0.0302639	0.00483879	0.0719402	0.0383895	Pyrimidine Biosynthesis	Nucleotides
ASPDt6	0	0	0	0	0	0	Transport, Extracellular	Transport
ASPDxt	0	0	0	0	0	0	Transport, Peroxisomal	Transport
ASPGLUm	-0.50816	1.10789	0.299867	-1.4618	3.25057	0.894389	Transport, Mitochondrial	Transport
ASPt6	0	0	0	0	0	0	Transport, Extracellular	Transport
ASPTA	-0.53035	1.0857	0.277677	-1.48361	3.22876	0.872576	Alanine and Aspartate Metabolism	Amino Acids
ASPTAm	-1.10789	0.50816	-0.299867	-3.25057	1.4618	-0.894389	Alanine and Aspartate Metabolism	Amino Acids
ATP1ter	0	0	0	0	0	0	Transport, Endoplasmic Reticular	Transport
ATP2ter	0	0	0	0	0	0	Transport, Endoplasmic Reticular	Transport
ATPasel	0	0.0173658	0.0086829	0	0.0574786	0.0287393	Transport, Lysosomal	Transport
ATPH1e	0	0	0	0	0	0	Nucleotides	Nucleotides
ATPH2e	0	0	0	0	0	0	Nucleotides	Nucleotides
ATPS4m	0.717508	1.19593	0.95672	0	1.42191	0.710953	Oxidative Phosphorylation	Central Metabolism
ATPtm	0	1.24259	0.621297	0	1.16361	0.581804	Transport, Mitochondrial	Transport
ATPtn	0	0.460203	0.230102	0	1.0006	0.500302	Transport, Nuclear	Transport
ATPtx	0.0101708	0.108948	0.0595592	0	0.343254	0.171627	Transport, Peroxisomal	Transport
AVITE1t	0	0	0	0	0	0	Transport, Extracellular	Transport
AVITE2t	0	0	0	0	0	0	Transport, Extracellular	Transport
B_MANNASEly	0	0.0113377	0.00566884	0	0.0400487	0.0200244	N-Glycan Degradation	Glycosylation
B3GALT3g	0	0	0	0	0	0	Sphingolipid Metabolism	Lipids
B3GALT41g	0	0	0	0	0	0	Sphingolipid Metabolism	Lipids
B3GALT42g	0	0	0	0	0	0	Sphingolipid Metabolism	Lipids
B3GALT43g	0	0	0	0	0	0	Sphingolipid Metabolism	Lipids
B3GALT44g	0	0	0	0	0	0	Sphingolipid Metabolism	Lipids
B3GNT11g	0	0	0	0	0	0	Blood Group Biosynthesis	Heme
B3GNT12g	0	0	0	0	0	0	Blood Group Biosynthesis	Heme
B3GNT51g	0	0	0	0	0	0	Blood Group Biosynthesis	Heme
BALAtmr	0	0	0	0	0	0	Transport, Mitochondrial	Transport
BALAVECSEC	0	0	0	0	0	0	Transport, Extracellular	Transport
BAMPPALDOX	0	0	0	0	0	0	beta-Alanine metabolism	Amino Acids
BAMPPALDOXm	0	0	0	0	0	0	beta-Alanine metabolism	Amino Acids
BBHOX	0	0	0	0	0	0	Lysine Metabolism	Amino Acids
BDHm	-0.385144	0	-0.192572	-0.604811	0	-0.302406	Butanoate Metabolism	FAS
BDMT_L	0	0.0113377	0.00566884	0	0.0400487	0.0200244	N-Glycan Biosynthesis	Glycosylation
BDMT_U	0	0.0113377	0.00566884	0	0.0400487	0.0200244	N-Glycan Biosynthesis	Glycosylation
BETALDHx	0	0	0	0	0	0	Glycine, Serine, and Threonine Metabolism	Amino Acids
BETALDHxm	0	0.0262582	0.0131291	0	0.0908177	0.0454089	Glycine, Serine, and Threonine Metabolism	Amino Acids
BHBt	-0.385144	0	-0.192572	-0.604811	0	-0.302406	Transport, Extracellular	Transport
BHBtm	-0.385144	0	-0.192572	-0.604811	0	-0.302406	Transport, Mitochondrial	Transport
BILDGLCURt	0	0.328792	0.164396	0	1.16141	0.580706	Transport, Extracellular	Transport
BILDGLCURte	0	0.328792	0.164396	0	1.16141	0.580706	Transport, Extracellular	Transport
BILDGLCURtr	0	0	0	0	0	0	Transport, Endoplasmic Reticular	Transport
BILGLCURt	0	0.328792	0.164396	0	1.16141	0.580706	Transport, Extracellular	Transport
BILGLCURte	0	0.328792	0.164396	0	1.16141	0.580706	Transport, Extracellular	Transport
BILGLCURtr	0	0	0	0	0	0	Transport, Endoplasmic Reticular	Transport
BILIRED	0	0	0	0	0	0	Heme Degradation	Heme
BILIRUBt2	0	0	0	0	0	0	Transport, Extracellular	Transport
BILIRUBtr	0	0	0	0	0	0	Transport, Endoplasmic Reticular	Transport
BIOCYTtn	0	0	0	0	0	0	Transport, Nuclear	Transport
biomass	0.0269955	0.0269955	0.0269955	0	0	0	Objective	Objective
BMTer_L	0	0	0	0	0	0	Glycosylphosphatidylinositol (GPI)-anchor biosynthesis	Glycosylation
BMTer_U	0	0	0	0	0	0	Glycosylphosphatidylinositol (GPI)-anchor biosynthesis	Glycosylation
BPNT	0	0.109597	0.0547987	0	0.387137	0.193569	Nucleotides	Nucleotides
BPNT2	0	0.328792	0.164396	0	1.16141	0.580706	Nucleotides	Nucleotides
BTND1	0	0	0	0	0	0	Biotin Metabolism	Vitamins
BTND1n	0	0	0	0	0	0	Biotin Metabolism	Vitamins
BTNDe	0	0	0	0	0	0	Biotin Metabolism	Vitamins
BTNDm	0	0	0	0	0	0	Biotin Metabolism	Vitamins
BTNPL	0	0	0	0	0	0	Biotin Metabolism	Vitamins
BTNPLm	0	0	0	0	0	0	Biotin Metabolism	Vitamins
BTNt2	-0.0626373	0	-0.0313187	-0.0527744	0	-0.0263872	Transport, Extracellular	Transport
BTNt2m	0	0	0	0	0	0	Transport, Mitochondrial	Transport
BTNt3i	0	0.328792	0.164396	0	1.16141	0.580706	Transport, Extracellular	Transport
BTNt4i	0	0	0	0	0	0	Transport, Extracellular	Transport
BTNtn	0	0	0	0	0	0	Transport, Nuclear	Transport
BUTt2m	0	0	0	0	0	0	Transport, Mitochondrial	Transport
BUTt2r	0	0	0	0	0	0	Transport, Extracellular	Transport
BVITEt	0	0	0	0	0	0	Transport, Extracellular	Transport
BZt	0	0	0	0	0	0	Transport, Extracellular	Transport
BZtr	0	0	0	0	0	0	Transport, Endoplasmic Reticular	Transport
C14STRr	0.000565042	0.00605264	0.00330884	0	0.0190697	0.00953483	Cholesterol Metabolism	Steriods
C160CPT1	0	0.0399866	0.0199933	0	0.0399866	0.0199933	Carnitine shuttle	FAS
C160CPT2	0	0.0399866	0.0199933	0	0.0399866	0.0199933	Carnitine shuttle	FAS
C160CRNt	0	0.0399866	0.0199933	0	0.0399866	0.0199933	Carnitine shuttle	FAS
C161CPT1	0	0.0399866	0.0199933	0	0.0399866	0.0199933	Carnitine shuttle	FAS
C161CPT12	0	0.0399866	0.0199933	0	0.0399866	0.0199933	Carnitine shuttle	FAS
C161CPT2	0	0.0399866	0.0199933	0	0.0399866	0.0199933	Carnitine shuttle	FAS
C161CPT22	0	0.0399866	0.0199933	0	0.0399866	0.0199933	Carnitine shuttle	FAS
C161CRN2t	0	0.0399866	0.0199933	0	0.0399866	0.0199933	Carnitine shuttle	FAS
C161CRNt	0	0.0399866	0.0199933	0	0.0399866	0.0199933	Carnitine shuttle	FAS
C180CPT1	0	0.0644223	0.0322111	0	0.114378	0.0571892	Carnitine shuttle	FAS
C180CPT2	0	0.0644223	0.0322111	0	0.114378	0.0571892	Carnitine shuttle	FAS
C180CRNt	0	0.0644223	0.0322111	0	0.114378	0.0571892	Carnitine shuttle	FAS
C181CPT1	0	0.0526093	0.0263047	0	0.103803	0.0519015	Carnitine shuttle	FAS
C181CPT2	0	0.0526093	0.0263047	0	0.103803	0.0519015	Carnitine shuttle	FAS
C181CRNt	0	0.0526093	0.0263047	0	0.103803	0.0519015	Carnitine shuttle	FAS
C204CPT1	0	0	0	0	0	0	Carnitine shuttle	FAS
C204CPT2	0	0	0	0	0	0	Carnitine shuttle	FAS
C204CRNt	0	0	0	0	0	0	Carnitine shuttle	FAS
C226COAtx	0	0	0	0	0	0	Transport, Peroxisomal	Transport
C226CPT1	0	0	0	0	0	0	Carnitine shuttle	FAS
C226CPT2	0	0	0	0	0	0	Carnitine shuttle	FAS
C226CRNt	0	0	0	0	0	0	Carnitine shuttle	FAS
C2M26DCOAHLm	0	0	0	0	0	0	Limonene and pinene degradation	Misc
C2M26DCOAHLx	0	0	0	0	0	0	Limonene and pinene degradation	Misc
C3STDH1Pr	0	0.00605264	0.00302632	0	0.0190697	0.00953483	Cholesterol Metabolism	Steriods
C3STDH1r	0	0.00605264	0.00302632	0	0.0190697	0.00953483	Cholesterol Metabolism	Steriods
C3STKR2r	0.000565042	0.00605264	0.00330884	0	0.0190697	0.00953483	Cholesterol Metabolism	Steriods
C4STMO1r	0.000565042	0.00605264	0.00330884	0	0.0190697	0.00953483	Cholesterol Metabolism	Steriods
C4STMO2Pr	0	0.00605264	0.00302632	0	0.0190697	0.00953483	Cholesterol Metabolism	Steriods
C4STMO2r	0	0.00605264	0.00302632	0	0.0190697	0.00953483	Cholesterol Metabolism	Steriods
CAATPS	0	0.328792	0.164396	0	1.16141	0.580706	Transport, Extracellular	Transport
CAMPt	0	0.0214326	0.0107163	0	0.0268406	0.0134203	Transport, Extracellular	Transport
CAT2p	0	0	0	0	0	0	Glycolysis/Gluconeogenesis	Central Metabolism
CAt7r	0	0	0	0	0	0	Transport, Extracellular	Transport
CATm	0	0.616486	0.308243	0	0.905262	0.452631	ROS Detoxification	ROS
CATp	0	0.616486	0.308243	0	0.905262	0.452631	Miscellaneous	Misc
CBL2OR	0	0	0	0	0	0	Vitamin B12 Metabolism	Vitamins
CBL2tm	0	0	0	0	0	0	Transport, Mitochondrial	Transport
CBLATm	0	0	0	0	0	0	Vitamin B12 Metabolism	Vitamins
CBPPer	0	0	0	0	0	0	Glycolysis/Gluconeogenesis	Central Metabolism
CBPS	0.00336987	0.0571578	0.0302639	0.00483879	0.0719402	0.0383895	Pyrimidine Biosynthesis	Nucleotides
CBPSam	0	0.0538255	0.0269128	0	0.0671014	0.0335507	Glutamate metabolism	Amino Acids
CBPter	0	0	0	0	0	0	Transport, Endoplasmic Reticular	Transport
CBR1	0	0	0	0	0	0	Eicosanoid Metabolism	UFAS
CBR2	0	0	0	0	0	0	Eicosanoid Metabolism	UFAS
CCA_D3t	0	0	0	0	0	0	Transport, Extracellular	Transport
CDIPTr	0.000101009	0.109699	0.0548998	0	0.387137	0.193569	Glycerophospholipid Metabolism	Lipids
CDPDAGtm	-0.0192035	0	-0.00960173	-0.0646581	0	-0.032329	Transport, Mitochondrial	Transport
CDS	0	0.109939	0.0549696	0	0.387137	0.193569	Glycerophospholipid Metabolism	Lipids
CDSm	0	0.0192035	0.00960173	0	0.0646581	0.032329	Glycerophospholipid Metabolism	Lipids
CEPTC	0	0.166166	0.083083	0	0.580706	0.290353	Glycerophospholipid Metabolism	Lipids
CEPTE	0	0.166101	0.0830503	0	0.580706	0.290353	Glycerophospholipid Metabolism	Lipids
CERK	0	0.0549312	0.0274656	0	0.125029	0.0625144	Sphingolipid Metabolism	Lipids
CERT1gt	-0.164396	0	-0.0821981	-0.580706	0	-0.290353	Transport, Golgi Apparatus	Transport
CERT1rt	0	0.109597	0.0547987	0	0.387137	0.193569	Transport, Endoplasmic Reticular	Transport
CERT2gt	0	0	0	0	0	0	Transport, Golgi Apparatus	Transport
CERT2rt	-0.109597	0	-0.0547987	-0.387137	0	-0.193569	Transport, Endoplasmic Reticular	Transport
CGLYt3(2)	0	0.110179	0.0550894	0	0.38814	0.19407	Transport, Extracellular	Transport
CGMPt	0	0.0206424	0.0103212	0	0.0268406	0.0134203	Transport, Extracellular	Transport
CHLP	0	0.328792	0.164396	0	1.16141	0.580706	Objective	Objective
CHLPCTD	0	0.166166	0.083083	0	0.580706	0.290353	Glycerophospholipid Metabolism	Lipids
CHLtm	-0.0192035	0.0262582	0.00352739	-0.0646581	0.0908177	0.0130798	Glycerophospholipid Metabolism	Lipids
CHOLATEt	0	0	0	0	0	0	Transport, Mitochondrial	Transport
CHOLATEt2	0	0	0	0	0	0	Transport, Extracellular	Transport
CHOLD2m	0	0.0262582	0.0131291	0	0.0908177	0.0454089	Transport, Extracellular	Transport
CHOLK	0	0.330431	0.165216	0	1.16141	0.580706	Glycine, Serine, and Threonine Metabolism	Amino Acids
CHOLPtg	-0.164396	0	-0.0821981	-0.580706	0	-0.290353	Glycerophospholipid Metabolism	Lipids
CHOLPtl	-0.0320723	0	-0.0160361	-0.105342	0	-0.0526712	Transport, Golgi Apparatus	Transport
CHOLt4	0	0	0	0	0	0	Transport, Lysosomal	Transport
CHOLtg	0	0.164396	0.0821981	0	0.580706	0.290353	Transport, Extracellular	Transport
CHOLtn	0	0	0	0	0	0	Transport, Golgi Apparatus	Transport
CHOLtr	0	0.164396	0.0821981	0	0.580706	0.290353	Transport, Nuclear	Transport
CHOLtu	-0.000102798	-0.000102798	-0.000102798	-0.00161266	-0.00161266	-0.00161266	Transport, Endoplasmic Reticular	Transport
CHSTEROLSULT	0	0.109597	0.0547987	0	0.387137	0.193569	Transport, Extracellular	Transport
CHSTEROLt	0	0.00540449	0.00270225	0	0.0188103	0.00940517	Steroid Metabolism	Steriods
CHSTEROLt1	0	0	0	0	0	0	Transport, Extracellular	Transport
CHSTEROLt2	0.000565042	0.00596953	0.00326729	0	0.0188103	0.00940517	Transport, Mitochondrial	Transport
CHSTEROLt3	-0.00596953	-0.000565042	-0.00326729	-0.0188103	0	-0.00940517	Transport, Mitochondrial	Transport
CHSTEROLtg	0	0	0	0	0	0	Transport, Mitochondrial	Transport
CHTNASE	0	0	0	0	0	0	Transport, Golgi Apparatus	Transport
CHTNASEe	0	0	0	0	0	0	Aminosugar Metabolism	Glycosylation
CITL	0	0.521073	0.260536	0	1.14936	0.574679	Aminosugar Metabolism	Glycosylation
CITRtm	0	0	0	0	0	0	Citric Acid Cycle	Central Metabolism
CITt4_2	0	0	0	0	0	0	Transport, Mitochondrial	Transport
CITt4_4	0	0	0	0	0	0	Transport, Extracellular	Transport
CITtam	-0.821981	0	-0.410991	-2.88778	0	-1.44389	Transport, Extracellular	Transport
CITtbm	0	0.284384	0.142192	0	0.297159	0.148579	Transport, Mitochondrial	Transport
CK	0	1.01641	0.508205	0	0.833438	0.416719	Transport, Mitochondrial	Transport
CKc	-1.05762	0	-0.528808	-0.129978	0	-0.0649892	Urea cycle/amino group metabolism	Amino Acids
CLFORtex	0	0.00301879	0.0015094	0	0.00949859	0.00474929	Urea cycle/amino group metabolism	Amino Acids
CLFORtex2	0	0.00603759	0.00301879	0	0.0189972	0.00949859	Transport, Extracellular	Transport
CLHCO3tex2	0	0	0	0	0	0	Transport, Extracellular	Transport
CLHCOtex	0	0	0	0	0	0	Transport, Extracellular	Transport
CLI2tex	0	0	0	0	0	0	Transport, Extracellular	Transport
CLOHtex2	0	0	0	0	0	0	Transport, Extracellular	Transport
CLOXAtex2	0	0	0	0	0	0	Transport, Extracellular	Transport
CLPNDCOAtx	0	0	0	0	0	0	Transport, Extracellular	Transport
CLPNDCPT1	0	0	0	0	0	0	Transport, Peroxisomal	Transport
CLPNDCPT2	0	0	0	0	0	0	Carnitine shuttle	FAS
CLPNDCRNt	0	0	0	0	0	0	Carnitine shuttle	FAS
CLPNDt	0	0	0	0	0	0	Carnitine shuttle	FAS
CLS_hs	0	0	0	0	0	0	Transport, Extracellular	Transport
CMPACNAtg	0	0.00756134	0.00378067	0	0.0267094	0.0133547	Glycerophospholipid Metabolism	Lipids
CMPACNAtn	0	0.00749242	0.00374621	0	0.0264659	0.013233	Transport, Golgi Apparatus	Transport
CMPSAS	0	0.00756134	0.00378067	0	0.0267094	0.0133547	Transport, Nuclear	Transport
CMPSASn	0	0.00749242	0.00374621	0	0.0264659	0.013233	Aminosugar Metabolism	Glycosylation
CO2t	-10.5076	0	-5.25382	-10.7416	0	-5.37079	Aminosugar Metabolism	Glycosylation
CO2ter	-0.0121053	-0.00113008	-0.00661769	-0.0381393	0	-0.0190697	Transport, Extracellular	Transport
CO2tg	0	0	0	0	0	0	Transport, Endoplasmic Reticular	Transport
CO2tm	-0.465482	0.524952	0.0297349	-0.668238	2.59553	0.963645	Transport, Golgi Apparatus	Transport
CO2tn	0	0	0	0	0	0	Transport, Mitochondrial	Transport
CO2tp	-0.0363159	-0.00339025	-0.0198531	-0.114418	0	-0.057209	Transport, Nuclear	Transport
COAtg	0	0	0	0	0	0	Transport, Peroxisomal	Transport
COAtl	0	0	0	0	0	0	Transport, Golgi Apparatus	Transport
COAtm	-0.134631	0.556497	0.210933	-0.483922	1.20283	0.359455	Transport, Lysosomal	Transport
COAtn	0	0	0	0	0	0	Transport, Mitochondrial	Transport
COAtp	-0.569114	-0.00339025	-0.286252	-1.28349	0	-0.641746	Transport, Nuclear	Transport
COAtr	0	0	0	0	0	0	Transport, Peroxisomal	Transport
COKECBESr	0	0	0	0	0	0	Transport, Endoplasmic Reticular	Transport
COQ3m	0	0	0	0	0	0	Alkaloid biosynthesis II	Vitamins
COQ5m	0	0	0	0	0	0	Ubiquinone Biosynthesis	Vitamins
COQ6m	0	0	0	0	0	0	Ubiquinone Biosynthesis	Vitamins
COQ7m	0	0	0	0	0	0	Ubiquinone Biosynthesis	Vitamins
CORE2GTg	0	0.00756134	0.00378067	0	0.0267094	0.0133547	Ubiquinone Biosynthesis	Vitamins
CORE6GTg	0	0	0	0	0	0	O-Glycan Biosynthesis	Glycosylation
COt	0	0	0	0	0	0	O-Glycan Biosynthesis	Glycosylation
COUCOAFm	0	0	0	0	0	0	Transport, Extracellular	Transport
COUMARINte	0	0	0	0	0	0	Ubiquinone Biosynthesis	Vitamins
CPCTDTX	0	0	0	0	0	0	Transport, Extracellular	Transport
CPPPGO	0	0	0	0	0	0	Glycerophospholipid Metabolism	Lipids
CREATt4(2)r	-0.046052	0	-0.023026	-0.0575649	0	-0.0287825	Heme Biosynthesis	Heme
CREATtmdiffir	0	1.24943	0.624714	0	1.26376	0.631879	Transport, Extracellular	Transport
CRMPte	0	0.0549312	0.0274656	0	0.125029	0.0625144	Urea cycle/amino group metabolism	Amino Acids
CRNCAR3tp	0	0	0	0	0	0	Transport, Extracellular	Transport
CRNCARtp	0	0.565724	0.282862	0	1.28349	0.641746	Transport, Peroxisomal	Transport
CRNt	0	0	0	0	0	0	Transport, Peroxisomal	Transport
CRNtHa	0	0	0	0	0	0	Transport, Extracellular	Transport
CRNtim	0	0.547987	0.273994	0	1.93569	0.967844	Transport, Extracellular	Transport
CRNtuIR	0	0	0	0	0	0	Transport, Mitochondrial	Transport
CRNtuNa	0	0	0	0	0	0	Transport, Extracellular	Transport
CRNtx	0	0	0	0	0	0	Transport, Extracellular	Transport
CRTSLt	0	0	0	0	0	0	Transport, Peroxisomal	Transport
CRTSLtm	0	0	0	0	0	0	Transport, Extracellular	Transport
CRTSLtr	0	0	0	0	0	0	Transport, Mitochondrial	Transport
CRTSTRNt	0	0	0	0	0	0	Transport, Endoplasmic Reticular	Transport
CRTSTRNtm	0	0	0	0	0	0	Transport, Extracellular	Transport
CRTSTRNtr	0	0	0	0	0	0	Transport, Mitochondrial	Transport
CRVNCtr	0	0	0	0	0	0	Transport, Endoplasmic Reticular	Transport
CSm	0	0.682269	0.341135	0	1.44921	0.724605	Transport, Extracellular	Transport
CSNAT	0	0	0	0	0	0	Citric Acid Cycle	Central Metabolism
CSNAT2m	0	0	0	0	0	0	Carnitine shuttle	FAS
CSNAT2x	0	0	0	0	0	0	Carnitine shuttle	FAS
CSNAT3x	0	0	0	0	0	0	Fatty Acid Metabolism	FAS
CSNATer	0	0	0	0	0	0	Carnitine shuttle	FAS
CSNATm	0	0.547987	0.273994	0	1.93569	0.967844	Fatty Acid Metabolism	FAS
CSNATp	0	0.565724	0.282862	0	1.28349	0.641746	Fatty Acid Metabolism	FAS
CSNATr	-0.0163793	0.547987	0.265804	-0.0280813	1.93569	0.953803	Fatty Acid Metabolism	FAS
CSNt	0	0	0	0	0	0	Carnitine shuttle	FAS
CSPG_At	0	0	0	0	0	0	Transport, Extracellular	Transport
CSPG_Atly	0	0	0	0	0	0	Transport, Extracellular	Transport
CSPG_Bt	0	0	0	0	0	0	Transport, Lysosomal	Transport
CSPG_Btly	0	0	0	0	0	0	Transport, Extracellular	Transport
CSPG_Ct	0	0	0	0	0	0	Transport, Lysosomal	Transport
CSPG_Ctly	0	0	0	0	0	0	Transport, Extracellular	Transport
CSPG_Dt	0	0	0	0	0	0	Transport, Lysosomal	Transport
CSPG_Dtly	0	0	0	0	0	0	Transport, Extracellular	Transport
CSPG_Et	0	0	0	0	0	0	Transport, Lysosomal	Transport
CSPG_Etly	0	0	0	0	0	0	Transport, Extracellular	Transport
CTPS1	0	0.167104	0.083552	0	0.583128	0.291564	Transport, Lysosomal	Transport
CTPS2	0	0.128472	0.0642358	0	0.405047	0.202523	Nucleotides	Nucleotides
CTPtn	0	0.00749242	0.00374621	0	0.0264659	0.013233	Pyrimidine Biosynthesis	Nucleotides
CYANSTm	0	0	0	0	0	0	Transport, Nuclear	Transport
CYANt	0	0	0	0	0	0	Cysteine Metabolism	Amino Acids
CYANtm	0	0	0	0	0	0	Transport, Extracellular	Transport
CYOOm2	0	0.297265	0.148633	0	0.301754	0.150877	Transport, Mitochondrial	Transport
CYOOm3	0	0	0	0	0	0	Oxidative Phosphorylation	Central Metabolism
CYOR-u10m	0.265738	0.594531	0.430134	0.00483879	0.603508	0.304173	Oxidative Phosphorylation	Central Metabolism
CYSALANaEx	0	0	0	0	0	0	Oxidative Phosphorylation	Central Metabolism
CYSAMO	0	0.00315047	0.00157524	0	0.00209288	0.00104644	Transport, Extracellular	Transport
CYSASNNaEx	0	0	0	0	0	0	Taurine and hypotaurine metabolism	Amino Acids
CYSGLNNaEx	0	0	0	0	0	0	Transport, Extracellular	Transport
CYSGLUexR	0	0	0	0	0	0	Transport, Extracellular	Transport
CYSGLYex	0	0	0	0	0	0	Transport, Extracellular	Transport
CYSGLYexR	0	0	0	0	0	0	Transport, Extracellular	Transport
CYSSERNaEx	0	0	0	0	0	0	Transport, Extracellular	Transport
CYSt4	0	0	0	0	0	0	Transport, Extracellular	Transport
CYSTA	0	0.00157524	0.000787618	0	0.00104644	0.00052322	Transport, Extracellular	Transport
CYSTAm	0	0	0	0	0	0	Cysteine Metabolism	Amino Acids
CYStec	0	0	0	0	0	0	Cysteine Metabolism	Amino Acids
CYSTGL	0.0034326	0.00658307	0.00500784	0.00483797	0.00693085	0.00588441	Transport, Extracellular	Transport
CYSTGLUex	0	0	0	0	0	0	Cysteine Metabolism	Amino Acids
CYSTHRNaEx	0	0	0	0	0	0	Transport, Extracellular	Transport
CYSTS	0.0034326	0.00658307	0.00500784	0.00483797	0.00693085	0.00588441	Transport, Extracellular	Transport
CYSTSERex	0	0	0	0	0	0	Methionine Metabolism	Amino Acids
CYTD	0	0.164396	0.0821981	0	0.580706	0.290353	Transport, Extracellular	Transport
CYTDK1	0	0.328792	0.164396	0	1.16141	0.580706	Pyrimidine Catabolism	Nucleotides
CYTDK2m	0	0.0192035	0.00960173	0	0.0646581	0.032329	Nucleotides	Nucleotides
CYTDn	0	0.109597	0.0547987	0	0.387137	0.193569	Nucleotides	Nucleotides
CYTDt	-0.0232501	0	-0.011625	0	0	0	Nucleotides	Nucleotides
CYTDt4	0	0	0	0	0	0	Transport, Extracellular	Transport
CYTDt5	0	0	0	0	0	0	Transport, Extracellular	Transport
CYTDtl	0	0	0	0	0	0	Transport, Extracellular	Transport
CYTDtm	0	0.0192035	0.00960173	0	0.0646581	0.032329	Nucleotides	Nucleotides
CYTDtn	0	0.109597	0.0547987	0	0.387137	0.193569	Transport, Mitochondrial	Transport
CYTK1	0.135064	0.156315	0.145689	0	-0.0929255	-0.0464628	Transport, Nuclear	Transport
CYTK10	-0.181192	-0.183191	-0.182192	0	0	0	Nucleotides	Nucleotides
CYTK10n	0	0	0	0	0	0	Nucleotides	Nucleotides
CYTK11	0.157942	0.171566	0.164754	0	0	0	Nucleotides	Nucleotides
CYTK11n	0	0	0	0	0	0	Nucleotides	Nucleotides
CYTK12	0	0	0	0.00483879	0.0513016	0.0280702	Nucleotides	Nucleotides
CYTK12n	0	0	0	0	0	0	Nucleotides	Nucleotides
CYTK13	0	0	0	0	0	0	Nucleotides	Nucleotides
CYTK13n	0	0	0	0	0	0	Nucleotides	Nucleotides
CYTK14	-0.159506	-0.17313	-0.166318	-0.00483879	-0.0513016	-0.0280702	Nucleotides	Nucleotides
CYTK14n	0	0	0	0	0	0	Nucleotides	Nucleotides
CYTK1m	0	0.0192035	0.00960173	0	0.0646581	0.032329	Nucleotides	Nucleotides
CYTK1n	0	0	0	0	0	0	Nucleotides	Nucleotides
CYTK2	0	0	0	0	0	0	Nucleotides	Nucleotides
CYTK2n	0	0	0	0	0	0	Nucleotides	Nucleotides
CYTK3	0	0	0	0	0	0	Nucleotides	Nucleotides
CYTK3n	0	0	0	0	0	0	Nucleotides	Nucleotides
CYTK4	0	0	0	0	0	0	Nucleotides	Nucleotides
CYTK4n	0	0	0	0	0	0	Nucleotides	Nucleotides
CYTK5	0	0	0	0	0	0	Nucleotides	Nucleotides
CYTK5n	0	0	0	0	0	0	Nucleotides	Nucleotides
CYTK6	0.00059612	-0.0138582	-0.00663104	0	-0.0401206	-0.0200603	Nucleotides	Nucleotides
CYTK6n	0	0	0	0	0	0	Nucleotides	Nucleotides
CYTK7	0	0	0	0	0	0	Nucleotides	Nucleotides
CYTK7n	0	0	0	0	0	0	Nucleotides	Nucleotides
CYTK8	0	0	0	0	0	0	Nucleotides	Nucleotides
CYTK8n	0	0	0	0	0	0	Nucleotides	Nucleotides
CYTK9	0	0	0	0	0	0	Nucleotides	Nucleotides
CYTK9n	0	0	0	0	0	0	Nucleotides	Nucleotides
CytOxe-	0	1.18906	0.594531	0	1.20702	0.603508	Nucleotides	Nucleotides
D-LACt2	-0.144324	0	-0.0721619	-0.534566	0	-0.267283	[]	Misc
D-LACtm	0	0	0	0	0	0	Transport, Extracellular	Transport
DADA	0	0.101372	0.0506862	0	0.306623	0.153312	Transport, Mitochondrial	Transport
DADAe	0	0.101372	0.0506862	0	0.306623	0.153312	Nucleotides	Nucleotides
DADNK	0.000580278	0.329373	0.164977	0	1.16141	0.580706	Nucleotides	Nucleotides
DADNt4	-0.101372	0	-0.0506862	-0.306623	0	-0.153312	Nucleotides	Nucleotides
DAG_HSter	0	0	0	0	0	0	Transport, Extracellular	Transport
DAGK_hs	-0.011265	0.327171	0.157953	0	1.16141	0.580706	Transport, Endoplasmic Reticular	Transport
DAGKn_hs	0	0	0	0	0	0	Glycerophospholipid Metabolism	Lipids
DAGt	-0.0166681	0	-0.00833405	0	0	0	Glycerophospholipid Metabolism	Lipids
DALAOXx	0	0.140971	0.0704854	0	0.199407	0.0997033	Transport, Extracellular	Transport
DALAt2r	0	0	0	0	0	0	D-alanine metabolism	Amino Acids
DALAt2rL	0	0	0	0	0	0	Transport, Extracellular	Transport
DALAxt	0	0.140971	0.0704854	0	0.199407	0.0997033	Transport, Lysosomal	Transport
DASCBH	0	0	0	0	0	0	D-alanine metabolism	Amino Acids
DASCBR	0	0.126459	0.0632293	0	0.301754	0.150877	Ascorbate and Aldarate Metabolism	Vitamins
DASPO1p	0	0	0	0	0	0	Ascorbate and Aldarate Metabolism	Vitamins
DATPtn	0	0.0197826	0.00989129	0	0.0268406	0.0134203	Alanine and Aspartate Metabolism	Amino Acids
DCK1n	0	0	0	0	0	0	Transport, Nuclear	Transport
DCK2n	0	0	0	0	0	0	Nucleotides	Nucleotides
DCMPDA	-0.328212	0.0678303	-0.130191	-1.16141	0.247666	-0.456873	Nucleotides	Nucleotides
DCSPTN1COAtx	0	0	0	0	0	0	Pyrimidine Catabolism	Nucleotides
DCSPTN1CPT1	0	0	0	0	0	0	Transport, Peroxisomal	Transport
DCSPTN1CPT2	0	0	0	0	0	0	Carnitine shuttle	FAS
DCSPTN1CRNt	0	0	0	0	0	0	Carnitine shuttle	FAS
DCSPTN1t	0	0	0	0	0	0	Carnitine shuttle	FAS
DCTPtn	0	0.0299275	0.0149638	0	0.0447343	0.0223671	Transport, Extracellular	Transport
DCYTD	0	0.329373	0.164686	0	1.16141	0.580706	Transport, Nuclear	Transport
DCYTt	-0.0356289	0	-0.0178144	-0.0447343	0	-0.0223671	Pyrimidine Catabolism	Nucleotides
DEBRISOQUINEt	0	0	0	0	0	0	Transport, Extracellular	Transport
DEDOLP1_L	0	0	0	0	0	0	Transport, Extracellular	Transport
DEDOLP1_U	0	0	0	0	0	0	N-Glycan Biosynthesis	Glycosylation
DEDOLP2_L	0	0	0	0	0	0	N-Glycan Biosynthesis	Glycosylation
DEDOLP2_U	0	0	0	0	0	0	N-Glycan Biosynthesis	Glycosylation
DEDOLR_L	0	0	0	0	0	0	N-Glycan Biosynthesis	Glycosylation
DEDOLR_U	0	0	0	0	0	0	N-Glycan Biosynthesis	Glycosylation
DESAT16_2	3.29962e-05	0.10258	0.0513067	0	0.299334	0.149667	N-Glycan Biosynthesis	Glycosylation
DESAT18_10	0	0	0	0	0	0	Fatty acid elongation	FAS
DESAT18_3	0	0.0540013	0.0270006	0	0.175085	0.0875423	Fatty acid elongation	FAS
DESAT18_4	0	0.0894673	0.0447337	0	0.249078	0.124539	Fatty acid elongation	FAS
DESAT18_5	0	0.0894673	0.0447337	0	0.249078	0.124539	Fatty acid elongation	FAS
DESAT18_6	0	0.0545046	0.0272523	0	0.157429	0.0787147	Fatty acid elongation	FAS
DESAT18_7	0	0.0449566	0.0224783	0	0.146591	0.0732954	Fatty acid elongation	FAS
DESAT18_8	0	0.0449566	0.0224783	0	0.146591	0.0732954	Fatty acid elongation	FAS
DESAT18_9	0	0	0	0	0	0	Fatty acid elongation	FAS
DESAT20_1	0	0	0	0	0	0	Fatty acid elongation	FAS
DESAT20_2	0	0	0	0	0	0	Fatty acid elongation	FAS
DESAT22_1p	0	0	0	0	0	0	Fatty acid elongation	FAS
DESAT22_2p	0	0	0	0	0	0	Fatty acid elongation	FAS
DESAT24_1	0	0	0	0	0	0	Fatty acid elongation	FAS
DGAT	7.40336e-05	0.018724	0.00939901	0	0	0	Fatty acid elongation	FAS
DGCHOLte	0	0	0	0	0	0	Triacylglycerol Synthesis	Lipids
DGK1	-0.0682714	-0.000403244	-0.0343373	-0.247666	0	-0.123833	Transport, Extracellular	Transport
DGK2m	0	0.0272308	0.0136154	0	0.0671014	0.0335507	Nucleotides	Nucleotides
DGNSKm	0	0.0272308	0.0136154	0	0.0671014	0.0335507	Nucleotides	Nucleotides
DGSNt	-0.0215302	0	-0.0107651	-0.0268406	0	-0.0134203	Nucleotides	Nucleotides
DGSNtm	0	0.0272308	0.0136154	0	0.0671014	0.0335507	Transport, Extracellular	Transport
DGTPtn	0	0.0214552	0.0107276	0	0.0268406	0.0134203	Transport, Mitochondrial	Transport
DGULND	0	0.126626	0.0633129	0	0.39726	0.19863	Transport, Nuclear	Transport
DHAAt1r	0	0	0	0	0	0	Pentose and Glucuronate Interconversions	Central Metabolism
DHAPA	0	0	0	0	0	0	Transport, Extracellular	Transport
DHAPAx	0	0	0	0	0	0	Triacylglycerol Synthesis	Lipids
DHCHOLESTANATEtm	0	0	0	0	0	0	Triacylglycerol Synthesis	Lipids
DHCR241r	0	0.00605264	0.00302632	0	0.0190697	0.00953483	Transport, Peroxisomal	Transport
DHCR242r	0	0.00605264	0.00302632	0	0.0190697	0.00953483	Cholesterol Metabolism	Steriods
DHCR243r	0	0.00596953	0.00298477	0	0.0188103	0.00940517	Cholesterol Metabolism	Steriods
DHCR71r	0	0.00596953	0.00298477	0	0.0188103	0.00940517	Cholesterol Metabolism	Steriods
DHCR72r	0	0.00596953	0.00298477	0	0.0188103	0.00940517	Cholesterol Metabolism	Steriods
DHCRD1	0	0.0552525	0.0276262	0	0.134203	0.0671014	Cholesterol Metabolism	Steriods
DHCRD2	0	0.00558049	0.00279025	0	0.0174965	0.00874823	Sphingolipid Metabolism	Lipids
DHDPBMTm	0	0	0	0	0	0	Sphingolipid Metabolism	Lipids
DHEASt	0	0	0	0	0	0	Ubiquinone Biosynthesis	Vitamins
DHEAStr	0	0	0	0	0	0	Transport, Extracellular	Transport
DHEAtr	0	0	0	0	0	0	Transport, Extracellular	Transport
DHFR	0.000580278	0.0487794	0.0246798	0	0.0671014	0.0335507	Transport, Endoplasmic Reticular	Transport
DHFtl	-0.0821981	0	-0.0410991	-0.290353	0	-0.145177	Folate Metabolism	Vitamins
DHFtm	0	0.0657585	0.0328792	0	0.232282	0.116141	Transport, Lysosomal	Transport
DHORD9	0.00336987	0.0571578	0.0302639	0.00483879	0.0719402	0.0383895	Transport, Mitochondrial	Transport
DHORTS	-0.0571578	-0.00336987	-0.0302639	-0.0719402	-0.00483879	-0.0383895	Pyrimidine Biosynthesis	Nucleotides
DHPM1	0	0	0	0	0	0	Pyrimidine Biosynthesis	Nucleotides
DHPR	0	0.0123354	0.00616771	0	0.0151453	0.00757263	Pyrimidine Catabolism	Nucleotides
DHPR2	0	0.0123354	0.00616771	0	0.0151453	0.00757263	Tetrahydrobiopterin	Vitamins
DIDPtn	0	0	0	0	0	0	Tetrahydrobiopterin	Vitamins
DIGALSGALSIDEte	0	0	0	0	0	0	Transport, Nuclear	Transport
DIGALSIDEtl	0	0	0	0	0	0	Transport, Extracellular	Transport
DINt	-0.0257746	0.101372	0.0377989	-0.0335507	0.306623	0.136536	Transport, Lysosomal	Transport
DITPtn	0	0	0	0	0	0	Transport, Extracellular	Transport
DLNLCGCPT1	0	0	0	0	0	0	Transport, Nuclear	Transport
DLNLCGCPT2	0	0	0	0	0	0	Carnitine shuttle	FAS
DLNLCGCRNt	0	0	0	0	0	0	Carnitine shuttle	FAS
DLNLCGt	0	0	0	0	0	0	Carnitine shuttle	FAS
DM_13-cis-oretn(n)	0	0	0	0	0	0	Transport, Extracellular	Transport
DM_13-cis-retn(n)	0	0	0	0	0	0	[]	Misc
DM_Asn-X-Ser/Thr(ly)	0	0	0	0	0	0	[]	Misc
DM_atp(c)	0	0.328792	0.164396	0	1.16141	0.580706	[]	Misc
DM_avite1(c)	0	0	0	0	0	0	[]	Misc
DM_avite2(c)	0	0	0	0	0	0	[]	Misc
DM_bvite(c)	0	0	0	0	0	0	[]	Misc
DM_datp(m)	0	0.0187545	0.00937727	0	0.0268406	0.0134203	[]	Misc
DM_datp(n)	0	0.0197826	0.00989129	0	0.0268406	0.0134203	[]	Misc
DM_dctp(m)	0	0.0272487	0.0136244	0	0.0447343	0.0223671	[]	Misc
DM_dctp(n)	0	0.0299275	0.0149638	0	0.0447343	0.0223671	[]	Misc
DM_dgtp(m)	0	0.0206553	0.0103277	0	0.0268406	0.0134203	[]	Misc
DM_dgtp(n)	0	0.0214552	0.0107276	0	0.0268406	0.0134203	[]	Misc
DM_dsT_antigen(g)	0	0	0	0	0	0	[]	Misc
DM_dttp(m)	0	0.026967	0.0134835	0	0.0671014	0.0335507	[]	Misc
DM_dttp(n)	0	0.0295236	0.0147618	0	0.0671014	0.0335507	[]	Misc
DM_ethamp(r)	0	0.0550622	0.0275311	0	0.134203	0.0671014	[]	Misc
DM_gpi_sig(er)	0	0	0	0	0	0	[]	Misc
DM_kdn(c)	0	0.0642839	0.032142	0	0.211952	0.105976	[]	Misc
DM_m(em)3gacpail_prot_hs(r)	0	0	0	0	0	0	[]	Misc
DM_mem2emgacpail_prot_hs(r)	0	0	0	0	0	0	[]	Misc
DM_n5m2masn(g)	0	0	0	0	0	0	[]	Misc
DM_oretn(n)	0	0	0	0	0	0	[]	Misc
DM_Ser-Gly/Ala-X-Gly(ly)	0	0	0	0	0	0	[]	Misc
DM_Ser/Thr(ly)	0	0	0	0	0	0	[]	Misc
DM_sprm(c)	0	0	0	0	0	0	[]	Misc
DM_sTn_antigen(g)	0	0	0	0	0	0	[]	Misc
DM_T_antigen(g)	0	0	0	0	0	0	[]	Misc
DM_yvite(c)	0	0	0	0	0	0	[]	Misc
DMATT	0	0	0	0	0	0	[]	Misc
DMATTx	0.00113008	0.0121053	0.00661769	0	0.0381393	0.0190697	Cholesterol Metabolism	Steriods
DMHPTCRNCPT1	0	0	0	0	0	0	Cholesterol Metabolism	Steriods
DMHPTCRNCPT2	0	0	0	0	0	0	Carnitine shuttle	FAS
DMHPTCRNt	0	0	0	0	0	0	Carnitine shuttle	FAS
DMHPTCRNte	0	0	0	0	0	0	Carnitine shuttle	FAS
DMNONCRNCPT2	0	0	0	0	0	0	Transport, Extracellular	Transport
DMNONCRNt	0	0	0	0	0	0	Carnitine shuttle	FAS
DNADDP	0	0.164396	0.0821981	0	0.580706	0.290353	Carnitine shuttle	FAS
DNADtn	-0.460203	0	-0.230102	-1.0006	0	-0.500302	NAD Metabolism	Vitamins
DNAMTn	0	0	0	0	0	0	Transport, Nuclear	Transport
DNAMTSEn	0	0	0	0	0	0	Methionine Metabolism	Amino Acids
DNDPt10m	0	0	0	0	0	0	Selenoamino acid metabolism	Amino Acids
DNDPt11m	0	0.00142616	0.000713081	0	0	0	Transport, Mitochondrial	Transport
DNDPt12m	0	0.0274619	0.013731	0	0.0671014	0.0335507	Transport, Mitochondrial	Transport
DNDPt13m	0	0.0274619	0.013731	0	0.0671014	0.0335507	Transport, Mitochondrial	Transport
DNDPt14m	0	0	0	0	0	0	Transport, Mitochondrial	Transport
DNDPt15m	0	0.0274619	0.013731	0	0.0670404	0.0335202	Transport, Mitochondrial	Transport
DNDPt16m	0	0.0274619	0.013731	0	0.0670404	0.0335202	Transport, Mitochondrial	Transport
DNDPt17m	0	0	0	0	0	0	Transport, Mitochondrial	Transport
DNDPt18m	0	0.0274619	0.013731	0	0.0671014	0.0335507	Transport, Mitochondrial	Transport
DNDPt19m	0	0.0274619	0.013731	0	0.0671014	0.0335507	Transport, Mitochondrial	Transport
DNDPt1m	0	0.0274619	0.013731	0	0.0671014	0.0335507	Transport, Mitochondrial	Transport
DNDPt20m	0	0.0274619	0.013731	0	0.0671014	0.0335507	Transport, Mitochondrial	Transport
DNDPt21m	0	0.0274619	0.013731	0	0.0671014	0.0335507	Transport, Mitochondrial	Transport
DNDPt22m	0	0	0	0	0.0671014	0.0335507	Transport, Mitochondrial	Transport
DNDPt23m	0	0	0	0	0.0671014	0.0335507	Transport, Mitochondrial	Transport
DNDPt24m	0	0	0	0	0.0671014	0.0335507	Transport, Mitochondrial	Transport
DNDPt25m	0	0	0	0	0.0671014	0.0335507	Transport, Mitochondrial	Transport
DNDPt26m	0	0.0157671	0.00788355	0	0.0671014	0.0335507	Transport, Mitochondrial	Transport
DNDPt27m	0	0.0204283	0.0102141	0	0	0	Transport, Mitochondrial	Transport
DNDPt28m	0	0	0	0	0.0671014	0.0335507	Transport, Mitochondrial	Transport
DNDPt29m	0	0	0	0	0.00693085	0.00346543	Transport, Mitochondrial	Transport
DNDPt2m	0	0.0274619	0.013731	0	0.0671014	0.0335507	Transport, Mitochondrial	Transport
DNDPt30m	0	0.0274619	0.013731	0	0.0671014	0.0335507	Transport, Mitochondrial	Transport
DNDPt31m	0	0.0274619	0.013731	0	0.0671014	0.0335507	Transport, Mitochondrial	Transport
DNDPt32m	0	0.0274619	0.013731	0	0.0671014	0.0335507	Transport, Mitochondrial	Transport
DNDPt33m	0	0	0	0	0	0	Transport, Mitochondrial	Transport
DNDPt34m	0	0	0	0	0	0	Transport, Mitochondrial	Transport
DNDPt35m	0	0	0	0	0	0	Transport, Mitochondrial	Transport
DNDPt36m	0	0	0	0	0	0	Transport, Mitochondrial	Transport
DNDPt37m	0	0.0249113	0.0124557	0	0	0	Transport, Mitochondrial	Transport
DNDPt38m	0	0	0	0	0	0	Transport, Mitochondrial	Transport
DNDPt39m	0	0.0249113	0.0124557	0	0.0671014	0.0335507	Transport, Mitochondrial	Transport
DNDPt3m	0	0	0	0	0	0	Transport, Mitochondrial	Transport
DNDPt40m	0	0	0	0	0	0	Transport, Mitochondrial	Transport
DNDPt41m	0	0	0	0	0	0	Transport, Mitochondrial	Transport
DNDPt42m	0	0.0274619	0.013731	0	0.0671014	0.0335507	Transport, Mitochondrial	Transport
DNDPt43m	0	0.0274619	0.013731	0	0.0671014	0.0335507	Transport, Mitochondrial	Transport
DNDPt44m	0	0.0274619	0.013731	0	0.0671014	0.0335507	Transport, Mitochondrial	Transport
DNDPt45m	0	0.0274619	0.013731	0	0.0671014	0.0335507	Transport, Mitochondrial	Transport
DNDPt46m	0	0	0	0	0	0	Transport, Mitochondrial	Transport
DNDPt47m	0	0	0	0	0	0	Transport, Mitochondrial	Transport
DNDPt48m	0	0	0	0	0.0670404	0.0335202	Transport, Mitochondrial	Transport
DNDPt49m	0	0	0	0	0	0	Transport, Mitochondrial	Transport
DNDPt4m	0	0	0	0	0	0	Transport, Mitochondrial	Transport
DNDPt50m	0	0	0	0	0	0	Transport, Mitochondrial	Transport
DNDPt51m	0	0	0	0	0	0	Transport, Mitochondrial	Transport
DNDPt52m	0	0.0157671	0.00788355	0	0.00134216	0.000671081	Transport, Mitochondrial	Transport
DNDPt53m	0	0.0204283	0.0102141	0	0.0649342	0.0324671	Transport, Mitochondrial	Transport
DNDPt54m	0	0	0	0	0	0	Transport, Mitochondrial	Transport
DNDPt55m	0	0.0274619	0.013731	0	0.0671014	0.0335507	Transport, Mitochondrial	Transport
DNDPt56m	0	0.0274619	0.013731	0	0.0671014	0.0335507	Transport, Mitochondrial	Transport
DNDPt57m	0	0.0274619	0.013731	0	0.0671014	0.0335507	Transport, Mitochondrial	Transport
DNDPt58m	0	0.0274619	0.013731	0	0.0671014	0.0335507	Transport, Mitochondrial	Transport
DNDPt59m	0	0	0	0	0	0	Transport, Mitochondrial	Transport
DNDPt5m	0	0	0	0	0	0	Transport, Mitochondrial	Transport
DNDPt60m	0	0	0	0	0	0	Transport, Mitochondrial	Transport
DNDPt61m	0	0	0	0	0	0	Transport, Mitochondrial	Transport
DNDPt62m	0	0	0	0	0	0	Transport, Mitochondrial	Transport
DNDPt63m	0	0	0	0	0	0	Transport, Mitochondrial	Transport
DNDPt6m	0	0	0	0	0	0	Transport, Mitochondrial	Transport
DNDPt7m	0	0	0	0	0	0	Transport, Mitochondrial	Transport
DNDPt8m	0	0	0	0	0	0	Transport, Mitochondrial	Transport
DNDPt9m	0	0	0	0	0	0	Transport, Mitochondrial	Transport
DOGULND1	0	0	0	0	0	0	Transport, Mitochondrial	Transport
DOGULND2	0	0	0	0	0	0	Ascorbate and Aldarate Metabolism	Vitamins
DOGULNO1	0	0	0	0	0	0	Ascorbate and Aldarate Metabolism	Vitamins
DOGULNO2	0	0	0	0	0	0	Ascorbate and Aldarate Metabolism	Vitamins
DOLASNT_Ler	0	0.0113377	0.00566884	0	0.0400487	0.0200244	Ascorbate and Aldarate Metabolism	Vitamins
DOLASNT_Uer	0	0.0113377	0.00566884	0	0.0400487	0.0200244	N-Glycan Biosynthesis	Glycosylation
DOLDPP_Ler	0	0.0113377	0.00566884	0	0.0400487	0.0200244	N-Glycan Biosynthesis	Glycosylation
DOLDPP_Uer	0	0.0113377	0.00566884	0	0.0400487	0.0200244	N-Glycan Biosynthesis	Glycosylation
DOLGLCP_Lter	0	0.164396	0.0821981	0	0.580706	0.290353	N-Glycan Biosynthesis	Glycosylation
DOLGLCP_Uter	0	0.164396	0.0821981	0	0.580706	0.290353	N-Glycan Biosynthesis	Glycosylation
DOLGPP_Ler	0	0.164396	0.0821981	0	0.580706	0.290353	N-Glycan Biosynthesis	Glycosylation
DOLGPP_Uer	0	0.164396	0.0821981	0	0.580706	0.290353	N-Glycan Biosynthesis	Glycosylation
DOLICHOL_Lter	0	0.109597	0.0547987	0	0.387137	0.193569	N-Glycan Biosynthesis	Glycosylation
DOLICHOL_Uter	0	0.109597	0.0547987	0	0.387137	0.193569	N-Glycan Biosynthesis	Glycosylation
DOLK_L	0	0.109597	0.0547987	0	0.387137	0.193569	N-Glycan Biosynthesis	Glycosylation
DOLK_U	0	0.109597	0.0547987	0	0.387137	0.193569	N-Glycan Biosynthesis	Glycosylation
DOLMANP_Lter	0	0.0453507	0.0226753	0	0.160195	0.0800974	N-Glycan Biosynthesis	Glycosylation
DOLMANP_Uter	0	0.0453507	0.0226753	0	0.160195	0.0800974	N-Glycan Biosynthesis	Glycosylation
DOLP_Lter	0	0.164396	0.0821981	0	0.580706	0.290353	N-Glycan Biosynthesis	Glycosylation
DOLP_Uter	0	0.164396	0.0821981	0	0.580706	0.290353	N-Glycan Biosynthesis	Glycosylation
DOLPGT1_Ler	0	0.0113377	0.00566884	0	0.0400487	0.0200244	N-Glycan Biosynthesis	Glycosylation
DOLPGT1_Uer	0	0.0113377	0.00566884	0	0.0400487	0.0200244	N-Glycan Biosynthesis	Glycosylation
DOLPGT2_Ler	0	0.0113377	0.00566884	0	0.0400487	0.0200244	N-Glycan Biosynthesis	Glycosylation
DOLPGT2_Uer	0	0.0113377	0.00566884	0	0.0400487	0.0200244	N-Glycan Biosynthesis	Glycosylation
DOLPGT3_Ler	0	0.0113377	0.00566884	0	0.0400487	0.0200244	N-Glycan Biosynthesis	Glycosylation
DOLPGT3_Uer	0	0.0113377	0.00566884	0	0.0400487	0.0200244	N-Glycan Biosynthesis	Glycosylation
DOLPH_Ler	0	0.109597	0.0547987	0	0.387137	0.193569	N-Glycan Biosynthesis	Glycosylation
DOLPH_Uer	0	0.109597	0.0547987	0	0.387137	0.193569	N-Glycan Biosynthesis	Glycosylation
DOLPMT_L	0	0.0453507	0.0226753	0	0.160195	0.0800974	N-Glycan Biosynthesis	Glycosylation
DOLPMT_U	0	0.0453507	0.0226753	0	0.160195	0.0800974	N-Glycan Biosynthesis	Glycosylation
DOLPMT1_Ler	0	0.0113377	0.00566884	0	0.0400487	0.0200244	N-Glycan Biosynthesis	Glycosylation
DOLPMT1_Uer	0	0.0113377	0.00566884	0	0.0400487	0.0200244	N-Glycan Biosynthesis	Glycosylation
DOLPMT2_Ler	0	0.0113377	0.00566884	0	0.0400487	0.0200244	N-Glycan Biosynthesis	Glycosylation
DOLPMT2_Uer	0	0.0113377	0.00566884	0	0.0400487	0.0200244	N-Glycan Biosynthesis	Glycosylation
DOLPMT3_Ler	0	0.0113377	0.00566884	0	0.0400487	0.0200244	N-Glycan Biosynthesis	Glycosylation
DOLPMT3_Uer	0	0.0113377	0.00566884	0	0.0400487	0.0200244	N-Glycan Biosynthesis	Glycosylation
DOLPMT4_Ler	0	0.0113377	0.00566884	0	0.0400487	0.0200244	N-Glycan Biosynthesis	Glycosylation
DOLPMT4_Uer	0	0.0113377	0.00566884	0	0.0400487	0.0200244	N-Glycan Biosynthesis	Glycosylation
DOPABMO	0	0	0	0	0	0	N-Glycan Biosynthesis	Glycosylation
DOPAMT	0	0	0	0	0	0	Tyrosine metabolism	Amino Acids
DOPASFt	0	0	0	0	0	0	Tyrosine metabolism	Amino Acids
DOPASULT	0	0	0	0	0	0	Transport, Extracellular	Transport
DOPAt4(2)r	0	0	0	0	0	0	Tyrosine metabolism	Amino Acids
DOPAtu	0	0.493189	0.246594	0	1.74212	0.871059	Transport, Extracellular	Transport
DOPAVESSEC	0	0.164396	0.0821981	0	0.580706	0.290353	Transport, Extracellular	Transport
DPCOAK	0	0	0	0	0	0	Transport, Extracellular	Transport
DPCOAPP	0	0.164396	0.0821981	0	0.580706	0.290353	CoA Biosynthesis	Vitamins
DPCOAtl	0	0	0	0	0	0	CoA Catabolism	Vitamins
DPHMBDCm	0	0	0	0	0	0	Transport, Lysosomal	Transport
DPMVDx	0.00339025	0.0363159	0.0198531	0	0.114418	0.057209	Ubiquinone Biosynthesis	Vitamins
DRIBt	-0.0666697	0	-0.0333349	-0.247666	0	-0.123833	Cholesterol Metabolism	Steriods
DRPA	0	0	0	0	0	0	Transport, Extracellular	Transport
DSAT	0.00019031	0.0552525	0.0277214	0	0.134203	0.0671014	Pentose Phosphate Pathway	Central Metabolism
DTDPtn	0	0	0	0	0	0	Sphingolipid Metabolism	Lipids
DTMPK	0	0.0295236	0.0147618	0	0.0671014	0.0335507	Transport, Nuclear	Transport
DTTPtn	0	0	0	0	0	0	Nucleotides	Nucleotides
DUDPtn	0	0	0	0	0	0	Transport, Nuclear	Transport
DUMPtn	0	0	0	0	0	0	Transport, Nuclear	Transport
DURAD	0	0	0	0	0	0	Transport, Nuclear	Transport
DURAD2	0	0	0	0	0	0	Pyrimidine Catabolism	Nucleotides
DURIK1	0	0.328792	0.164396	0	1.16141	0.580706	Pyrimidine Catabolism	Nucleotides
DURIK1m	0	0.410991	0.205495	0	1.45177	0.725883	Nucleotides	Nucleotides
DURIPP	-0.0488332	0.06725	0.00920842	-0.0671014	0.247666	0.0902824	Nucleotides	Nucleotides
DURIt	-0.036475	0	-0.0182375	-0.0671014	0	-0.0335507	Nucleotides	Nucleotides
DURItn	0	0	0	0	0	0	Transport, Extracellular	Transport
DUTPDPm	0	0.205495	0.102748	0	0.725883	0.362941	Transport, Nuclear	Transport
DUTPDPn	0	0	0	0	0	0	Nucleotides	Nucleotides
EAFLATOXINte	0	0	0	0	0	0	Nucleotides	Nucleotides
EBASTINEOHte	0	0	0	0	0	0	Transport, Extracellular	Transport
EBASTINEte	0	0	0	0	0	0	Transport, Extracellular	Transport
EBP1r	0	0.00605264	0.00302632	0	0.0190697	0.00953483	Transport, Extracellular	Transport
EBP2r	0	0.00605264	0.00302632	0	0.0190697	0.00953483	Cholesterol Metabolism	Steriods
ECOAH12m	0	0.000626959	0.00031348	0	0	0	Cholesterol Metabolism	Steriods
ECOAH1m	0	0	0	0	0	0	Valine, Leucine, and Isoleucine Metabolism	Amino Acids
ECOAH1x	0	0	0	0	0	0	Tryptophan metabolism	Amino Acids
ECOAH9m	0	0	0	0	0	0	Tryptophan metabolism	Amino Acids
EGMESTr	0	0	0	0	0	0	Valine, Leucine, and Isoleucine Metabolism	Amino Acids
EHGLAT	0	0	0	0	0	0	Alkaloid biosynthesis II	Vitamins
EHGLAT2m	0	0	0	0	0	0	Arginine and Proline Metabolism	Amino Acids
EHGLATm	0	0	0	0	0	0	Arginine and Proline Metabolism	Amino Acids
EICOSTETCPT1	0	0	0	0	0	0	Arginine and Proline Metabolism	Amino Acids
EICOSTETCPT2	0	0	0	0	0	0	Carnitine shuttle	FAS
EICOSTETCRNt	0	0	0	0	0	0	Carnitine shuttle	FAS
EICOSTETt	0	0	0	0	0	0	Carnitine shuttle	FAS
ELAIDCPT1	0	0.0399866	0.0199933	0	0.0399866	0.0199933	Transport, Extracellular	Transport
ELAIDCPT2	0	0.0399866	0.0199933	0	0.0399866	0.0199933	Carnitine shuttle	FAS
ELAIDCRNt	0	0.0399866	0.0199933	0	0.0399866	0.0199933	Carnitine shuttle	FAS
ELAIDt	-0.0894673	0	-0.0447337	-0.214774	0	-0.107387	Carnitine shuttle	FAS
ENGASE	0	0	0	0	0	0	Transport, Extracellular	Transport
ENGASE2	0	0	0	0	0	0	N-Glycan Degradation	Glycosylation
ENGASE2ly	0	0.0113377	0.00566884	0	0.0400487	0.0200244	N-Glycan Degradation	Glycosylation
ENMAN1g	0	0	0	0	0	0	N-Glycan Degradation	Glycosylation
ENMAN2g	0	0	0	0	0	0	N-Glycan Biosynthesis	Glycosylation
ENMAN3g	0	0	0	0	0	0	N-Glycan Biosynthesis	Glycosylation
ENMAN4g	0	0	0	0	0	0	N-Glycan Biosynthesis	Glycosylation
ENMAN5g	0	0	0	0	0	0	N-Glycan Biosynthesis	Glycosylation
ENMAN6g	0	0	0	0	0	0	N-Glycan Biosynthesis	Glycosylation
ENO	-0.060255	0.184362	0.0620534	-0.261379	0.503039	0.12083	N-Glycan Biosynthesis	Glycosylation
ESTRADIOLGLCt	0	0.328792	0.164396	0	1.16141	0.580706	Glycolysis/Gluconeogenesis	Central Metabolism
ESTRADIOLGLCt2	0	0.328792	0.164396	0	1.16141	0.580706	Transport, Extracellular	Transport
ESTRADIOLGLCtr	0	0	0	0	0	0	Transport, Extracellular	Transport
ESTRADIOLt	0	0	0	0	0	0	Transport, Endoplasmic Reticular	Transport
ESTRADIOLtr	0	0	0	0	0	0	Transport, Extracellular	Transport
ESTRIOLGLCte	0	0	0	0	0	0	Transport, Endoplasmic Reticular	Transport
ESTRIOLGLCtr	0	0	0	0	0	0	Transport, Extracellular	Transport
ESTRONEGLCt	0	0	0	0	0	0	Transport, Endoplasmic Reticular	Transport
ESTRONEGLCtr	0	0	0	0	0	0	Transport, Extracellular	Transport
ESTRONESt	0	0	0	0	0	0	Transport, Endoplasmic Reticular	Transport
ESTRONESt2	0	0	0	0	0	0	Transport, Extracellular	Transport
ESTRONEtr	0	0	0	0	0	0	Transport, Extracellular	Transport
ESTSULT	0	0.109597	0.0547987	0	0.387137	0.193569	Transport, Endoplasmic Reticular	Transport
ETF	0	0.591161	0.29558	0	0.598669	0.299334	Steroid Metabolism	Steriods
ETFQO	0	0.591161	0.29558	0	0.598669	0.299334	Fatty acid oxidation	UFAS
ETHAK	0	0.330431	0.165216	0	1.16141	0.580706	Fatty acid oxidation	UFAS
ETHP	0	0.328792	0.164396	0	1.16141	0.580706	Glycerophospholipid Metabolism	Lipids
ETOHMO	0	0	0	0	0	0	Glycerophospholipid Metabolism	Lipids
ETOHt	0	0	0	0	0	0	Glycolysis/Gluconeogenesis	Central Metabolism
ETOHtx	0	0	0	0	0	0	Transport, Extracellular	Transport
EX_10fthf(e)	0	0	0	0	0	0	Transport, Peroxisomal	Transport
EX_10fthf5glu(e)	0	0	0	0	0	0	[]	Transport
EX_10fthf6glu(e)	0	0	0	0	0	0	[]	Transport
EX_10fthf7glu(e)	0	0	0	0	0	0	[]	Transport
EX_11-cis-retfa(e)	0	0	0	0	0	0	[]	Transport
EX_13-cis-retnglc(e)	0	0	0	0	0	0	[]	Transport
EX_1glyc_hs(e)	0	0.0420632	0.0210316	0	0.149602	0.0748008	[]	Transport
EX_1mncam(e)	0	0	0	0	0	0	[]	Transport
EX_2425dhvitd2(e)	0	0	0	0	0	0	[]	Transport
EX_2425dhvitd3(e)	0	0.00486126	0.00243063	0	0.0169796	0.00848981	[]	Transport
EX_24nph(e)	0	0	0	0	0	0	[]	Transport
EX_25hvitd2(e)	0	0	0	0	0	0	[]	Transport
EX_25hvitd3(e)	0	0.00515547	0.00257774	0	0.017964	0.00898202	[]	Transport
EX_2hb(e)	0	0.00838558	0.00419279	0	0.00782529	0.00391264	[]	Transport
EX_2mcit(e)	0	0.00838558	0.00419279	0	0.00782529	0.00391264	[]	Transport
EX_35cgmp(e)	0	0.0206424	0.0103212	0	0.0268406	0.0134203	[]	Transport
EX_3aib(e)	0	0.000626959	0.00031348	0	0	0	[]	Transport
EX_3mlda(e)	0	0.00584639	0.0029232	0	0.00585106	0.00292553	[]	Transport
EX_4abut(e)	0	0.0697299	0.0348649	0	0.134203	0.0671014	[]	Transport
EX_4hdebrisoquine(e)	0	0	0	0	0	0	[]	Transport
EX_4hphac(e)	0	0	0	0	0.00178232	0.000891162	[]	Transport
EX_4mptnl(e)	0	0	0	0	0	0	[]	Transport
EX_4nph(e)	0	0	0	0	0	0	[]	Transport
EX_4nphsf(e)	0	0	0	0	0	0	[]	Transport
EX_4pyrdx(e)	0	0	0	0	0	0	[]	Transport
EX_5adtststerone(e)	0	0	0	0	0	0	[]	Transport
EX_5adtststeroneglc(e)	0	0	0	0	0	0	[]	Transport
EX_5dhf(e)	0	0	0	0	0	0	[]	Transport
EX_5fthf(e)	0	0	0	0	0	0	[]	Transport
EX_5htrp(e)	0	0.00811912	0.00405956	0	0.00851678	0.00425839	[]	Transport
EX_5mthf(e)	0	0	0	0	0	0	[]	Transport
EX_5thf(e)	0	0	0	0	0	0	[]	Transport
EX_6dhf(e)	0	0	0	0	0	0	[]	Transport
EX_6htststerone(e)	0	0	0	0	0	0	[]	Transport
EX_6thf(e)	0	0	0	0	0	0	[]	Transport
EX_7dhf(e)	0	0	0	0	0	0	[]	Transport
EX_7thf(e)	0	0	0	0	0	0	[]	Transport
EX_9-cis-retfa(e)	0	0	0	0	0	0	[]	Transport
EX_abt(e)	0	0.071116	0.035558	0	0.263948	0.131974	[]	Transport
EX_ac(e)	0	0.518135	0.259068	0	0.883186	0.441593	[]	Transport
EX_acac(e)	0	0.307198	0.153599	0	0.444193	0.222096	[]	Transport
EX_acald(e)	0	0	0	0	0	0	[]	Transport
EX_acetone(e)	0	0.321398	0.160699	0	0.444193	0.222096	[]	Transport
EX_acgalfucgalacgalfuc12gal14acglcgalgluside_hs(e)	0	0	0	0	0	0	[]	Transport
EX_acgalfucgalacgalfucgalacglcgal14acglcgalgluside_hs(e)	0	0	0	0	0	0	[]	Transport
EX_acgam(e)	0	0	0	0	0	0	[]	Transport
EX_ach(e)	0	0	0	0	0	0	[]	Transport
EX_acn13acngalgbside_hs(e)	0	0	0	0	0	0	[]	Transport
EX_acn23acngalgbside_hs(e)	0	0	0	0	0	0	[]	Transport
EX_acnacngal14acglcgalgluside_hs(e)	0	0	0	0	0	0	[]	Transport
EX_acnacngalgbside_hs(e)	0	0	0	0	0	0	[]	Transport
EX_acngalacglcgal14acglcgalgluside_hs(e)	0	0	0	0	0	0	[]	Transport
EX_ade(e)	0	0.0215302	0.0107651	0	0.0268406	0.0134203	[]	Transport
EX_adn(e)	0	0.0215302	0.0107651	0	0.0268406	0.0134203	[]	Transport
EX_adp	0	0	0	0	0	0	[]	Transport
EX_adprbp(e)	0	0	0	0	0	0	[]	Transport
EX_adprib(e)	0	0	0	0	0	0	[]	Transport
EX_adrn(e)	0	0	0	0	0	0	[]	Transport
EX_adrnl(e)	0	0	0	0	0	0	[]	Transport
EX_aflatoxin(e)	0	0	0	0	0	0	[]	Transport
EX_ahandrostanglc(e)	0	0	0	0	0	0	[]	Transport
EX_ak2lgchol_hs(e)	0	0	0	0	0	0	[]	Transport
EX_akg(e)	0	0.215523	0.107762	0	0.297159	0.148579	[]	Transport
EX_ala-B(e)	0	0	0	0	0	0	[]	Transport
EX_ala-D(e)	0	0.107651	0.0538255	0	0.134203	0.0671014	[]	Transport
EX_ala-L(e)	0	0.107651	0.0538255	0	0.134203	0.0671014	[]	Transport
EX_aldstrn(e)	0	0	0	0	0	0	[]	Transport
EX_amp(e)	0	0	0	0	0	0	[]	Transport
EX_andrstrn(e)	0	0	0	0	0	0	[]	Transport
EX_andrstrnglc(e)	0	0	0	0	0	0	[]	Transport
EX_aqcobal(e)	0	0	0	0	0	0	[]	Transport
EX_arab-L(e)	0	0	0	0	0	0	[]	Transport
EX_arach(e)	0	0	0	0	0	0	[]	Transport
EX_arachd(e)	0	0	0	0	0	0	[]	Transport
EX_arg-L(e)	-0.02375	0	-0.011875	-0.02375	0	-0.011875	[]	Transport
EX_ascb-L(e)	0	0	0	0	0	0	[]	Transport
EX_asn-L(e)	0	0.0538255	0.0269128	0	0.0671014	0.0335507	[]	Transport
EX_asp-D(e)	0	0	0	0	0	0	[]	Transport
EX_asp-L(e)	0	0	0	0	0	0	[]	Transport
EX_atp(e)	0	0	0	0	0	0	[]	Transport
EX_avite1(e)	0	0	0	0	0	0	[]	Transport
EX_avite2(e)	0	0	0	0	0	0	[]	Transport
EX_bhb(e)	0	0.385144	0.192572	0	0.604811	0.302406	[]	Transport
EX_bildglcur(e)	0	0	0	0	0	0	[]	Transport
EX_bilglcur(e)	0	0	0	0	0	0	[]	Transport
EX_bilirub(e)	0	0	0	0	0	0	[]	Transport
EX_biocyt(e)	0	0	0	0	0	0	[]	Transport
EX_btn(e)	0	0	0	0	0	0	[]	Transport
EX_but(e)	0	0	0	0	0	0	[]	Transport
EX_bvite(e)	0	0	0	0	0	0	[]	Transport
EX_bz(e)	0	0	0	0	0	0	[]	Transport
EX_ca2(e)	0	0	0	0	0	0	[]	Transport
EX_camp(e)	0	0.0214326	0.0107163	0	0.0268406	0.0134203	[]	Transport
EX_cca_d3(e)	0	0	0	0	0	0	[]	Transport
EX_cgly(e)	0	0.00315047	0.00157524	0	0.00209288	0.00104644	[]	Transport
EX_chol(e)	0	0.0278626	0.0139313	0	0.0972485	0.0486243	[]	Transport
EX_cholate(e)	0	0	0	0	0	0	[]	Transport
EX_chsterol(e)	0	0.00540449	0.00270225	0	0.0188103	0.00940517	[]	Transport
EX_chtn(e)	0	0	0	0	0	0	[]	Transport
EX_cit(e)	0	0.18658	0.0932902	0	0.297159	0.148579	[]	Transport
EX_cl(e)	0	0	0	0	0	0	[]	Transport
EX_CLPND(e)	0	0	0	0	0	0	[]	Transport
EX_cmp(e)	0	0	0	0	0	0	[]	Transport
EX_co(e)	0	0	0	0	0	0	[]	Transport
EX_co2(e)	0	10.5076	5.25382	0	10.7416	5.37079	[]	Transport
EX_coumarin(e)	0	0	0	0	0	0	[]	Transport
EX_creat(e)	0	0.046052	0.023026	0	0.0575649	0.0287825	[]	Transport
EX_crmp_hs(e)	0	0.0549312	0.0274656	0	0.125029	0.0625144	[]	Transport
EX_crn(e)	0	0	0	0	0	0	[]	Transport
EX_crtsl(e)	0	0	0	0	0	0	[]	Transport
EX_crtstrn(e)	0	0	0	0	0	0	[]	Transport
EX_crvnc(e)	0	0	0	0	0	0	[]	Transport
EX_csn(e)	0	0	0	0	0	0	[]	Transport
EX_cspg_a(e)	0	0	0	0	0	0	[]	Transport
EX_cspg_b(e)	0	0	0	0	0	0	[]	Transport
EX_cspg_c(e)	0	0	0	0	0	0	[]	Transport
EX_cspg_d(e)	0	0	0	0	0	0	[]	Transport
EX_cspg_e(e)	0	0	0	0	0	0	[]	Transport
EX_cyan(e)	0	0	0	0	0	0	[]	Transport
EX_cys-L(e)	0	0.00315047	0.00157524	0	0.00209288	0.00104644	[]	Transport
EX_cytd(e)	0	0.035406	0.017703	0	0.0447343	0.0223671	[]	Transport
EX_dad-2(e)	0	0.0215302	0.0107651	0	0.0268406	0.0134203	[]	Transport
EX_dag_hs(e)	0	0.068517	0.0342585	0	0.126644	0.0633221	[]	Transport
EX_dcsptn1(e)	0	0	0	0	0	0	[]	Transport
EX_dcyt(e)	0	0.0356289	0.0178144	0	0.0447343	0.0223671	[]	Transport
EX_debrisoquine(e)	0	0	0	0	0	0	[]	Transport
EX_dgchol(e)	0	0	0	0	0	0	[]	Transport
EX_dgsn(e)	0	0.0215302	0.0107651	0	0.0268406	0.0134203	[]	Transport
EX_dhdascb(e)	0	0	0	0	0	0	[]	Transport
EX_dheas(e)	0	0	0	0	0	0	[]	Transport
EX_dhf(e)	0	0	0	0	0	0	[]	Transport
EX_digalsgalside_hs(e)	0	0	0	0	0	0	[]	Transport
EX_din(e)	0	0.0257746	0.0128873	0	0.0335507	0.0167754	[]	Transport
EX_dlnlcg(e)	0	0	0	0	0	0	[]	Transport
EX_dmhptcrn(e)	0	0	0	0	0	0	[]	Transport
EX_dopa(e)	0	0	0	0	0	0	[]	Transport
EX_dopasf(e)	0	0	0	0	0	0	[]	Transport
EX_drib(e)	0	0.0666697	0.0333349	0	0.247666	0.123833	[]	Transport
EX_duri(e)	0	0.036475	0.0182375	0	0.0671014	0.0335507	[]	Transport
EX_eaflatoxin(e)	0	0	0	0	0	0	[]	Transport
EX_ebastine(e)	0	0	0	0	0	0	[]	Transport
EX_ebastineoh(e)	0	0	0	0	0	0	[]	Transport
EX_eicostet(e)	0	0	0	0	0	0	[]	Transport
EX_elaid(e)	0	0.0894673	0.0447337	0	0.214774	0.107387	[]	Transport
EX_estradiol(e)	0	0	0	0	0	0	[]	Transport
EX_estradiolglc(e)	0	0	0	0	0	0	[]	Transport
EX_estriolglc(e)	0	0	0	0	0	0	[]	Transport
EX_estroneglc(e)	0	0	0	0	0	0	[]	Transport
EX_estrones(e)	0	0	0	0	0	0	[]	Transport
EX_etoh(e)	0	0	0	0	0	0	[]	Transport
EX_fe2(e)	0	0	0	0	0	0	[]	Transport
EX_fol(e)	0	0	0	0	0	0	[]	Transport
EX_for(e)	0	0.00603759	0.00301879	0	0.0189972	0.00949859	[]	Transport
EX_fru(e)	0	0.115264	0.0576322	0	0.327194	0.163597	[]	Transport
EX_fuc-L(e)	0	0	0	0	0	0	[]	Transport
EX_fuc13galacglcgal14acglcgalgluside_hs(e)	0	0	0	0	0	0	[]	Transport
EX_fuc14galacglcgalgluside_hs(e)	0	0	0	0	0	0	[]	Transport
EX_fucacgalfucgalacglcgalgluside_hs(e)	0	0	0	0	0	0	[]	Transport
EX_fucacngal14acglcgalgluside_hs(e)	0	0	0	0	0	0	[]	Transport
EX_fucacngalacglcgalgluside_hs(e)	0	0	0	0	0	0	[]	Transport
EX_fucfuc12gal14acglcgalgluside_hs(e)	0	0	0	0	0	0	[]	Transport
EX_fucfuc132galacglcgal14acglcgalgluside_hs(e)	0	0	0	0	0	0	[]	Transport
EX_fucfucfucgalacglc13galacglcgal14acglcgalgluside_hs(e)	0	0	0	0	0	0	[]	Transport
EX_fucfucfucgalacglcgal14acglcgalgluside_hs(e)	0	0	0	0	0	0	[]	Transport
EX_fucfucgalacglcgalgluside_hs(e)	0	0	0	0	0	0	[]	Transport
EX_fucgal14acglcgalgluside_hs(e)	0	0	0	0	0	0	[]	Transport
EX_fucgalfucgalacglcgalgluside_hs(e)	0	0	0	0	0	0	[]	Transport
EX_fucgalgbside_hs(e)	0	0	0	0	0	0	[]	Transport
EX_gal(e)	0	0.0603202	0.0301601	0	0.223923	0.111961	[]	Transport
EX_galacglcgalgbside_hs(e)	0	0	0	0	0	0	[]	Transport
EX_galfuc12gal14acglcgalgluside_hs(e)	0	0	0	0	0	0	[]	Transport
EX_galfucgalacglcgal14acglcgalgluside_hs(e)	0	0	0	0	0	0	[]	Transport
EX_galgalfucfucgalacglcgalacglcgal14acglcgalgluside_hs(e)	0	0	0	0	0	0	[]	Transport
EX_galgalgalthcrm_hs(e)	0	0	0	0	0	0	[]	Transport
EX_gam(e)	0	0	0	0	0	0	[]	Transport
EX_gbside_hs(e)	0	0	0	0	0	0	[]	Transport
EX_gchola(e)	0	0	0	0	0	0	[]	Transport
EX_gd1b2_hs(e)	0	0	0	0	0	0	[]	Transport
EX_gd1c_hs(e)	0	0	0	0	0	0	[]	Transport
EX_gdchola(e)	0	0	0	0	0	0	[]	Transport
EX_gdp(e)	0	0	0	0	0	0	[]	Transport
EX_glc(e)	-0.2718	-0.156536	-0.214168	-0.2718	0.0553937	-0.108203	[]	Transport
EX_gln-L(e)	-0.0765	-0.0226745	-0.0495872	-0.0765	-0.00939858	-0.0429493	[]	Transport
EX_glu-L(e)	0	0.107651	0.0538255	0	0.134203	0.0671014	[]	Transport
EX_gluala(e)	0	0.0538255	0.0269128	0	0.0671014	0.0335507	[]	Transport
EX_gly(e)	0	0.107651	0.0538255	0	0.134203	0.0671014	[]	Transport
EX_glyb(e)	0	0.0262582	0.0131291	0	0.0908177	0.0454089	[]	Transport
EX_glyc-S(e)	0	0	0	0	0	0	[]	Transport
EX_glyc(e)	0	0.239086	0.119543	0	0.680058	0.340029	[]	Transport
EX_glygn2(e)	0	0	0	0	0	0	[]	Transport
EX_glygn4(e)	0	0	0	0	0	0	[]	Transport
EX_glygn5(e)	0	0	0	0	0	0	[]	Transport
EX_gmp(e)	0	0	0	0	0	0	[]	Transport
EX_gp1c_hs(e)	0	0	0	0	0	0	[]	Transport
EX_gp1calpha_hs(e)	0	0	0	0	0	0	[]	Transport
EX_gq1b_hs(e)	0	0	0	0	0	0	[]	Transport
EX_gq1balpha_hs(e)	0	0	0	0	0	0	[]	Transport
EX_gsn(e)	0	0.0215302	0.0107651	0	0.0268406	0.0134203	[]	Transport
EX_gt1a_hs(e)	0	0	0	0	0	0	[]	Transport
EX_gthox(e)	0	0	0	0	0	0	[]	Transport
EX_gthrd(e)	0	0	0	0	0	0	[]	Transport
EX_gtp(e)	0	0	0	0	0	0	[]	Transport
EX_gua(e)	0	0.0215302	0.0107651	0	0.0268406	0.0134203	[]	Transport
EX_h(e)	-10.204	0.453368	-4.87533	-10.4382	1.54623	-4.44598	[]	Transport
EX_h2o(e)	-0.231042	10.6925	5.23074	-0.00569406	11.1058	5.55007	[]	Transport
EX_h2o2(e)	0	0.153457	0.0767285	0	0.452631	0.226315	[]	Transport
EX_ha_pre1(e)	0	0.032142	0.016071	0	0.110759	0.0553797	[]	Transport
EX_ha(e)	0	0.016071	0.00803549	0	0.0553797	0.0276898	[]	Transport
EX_hco3(e)	-10	0.507632	-4.74618	-10	0.741589	-4.62921	[]	Transport
EX_hcoumarin(e)	0	0	0	0	0	0	[]	Transport
EX_hdca(e)	0	0.0549312	0.0274656	0	0.155015	0.0775076	[]	Transport
EX_hdcea(e)	0	0.0925288	0.0462644	0	0.243512	0.121756	[]	Transport
EX_hestratriol(e)	0	0	0	0	0	0	[]	Transport
EX_hexc(e)	0	0	0	0	0	0	[]	Transport
EX_his-L(e)	-0.01	-0.00415361	-0.0070768	-0.01	-0.00414894	-0.00707447	[]	Transport
EX_hista(e)	0	0.00584639	0.0029232	0	0.00585106	0.00292553	[]	Transport
EX_hom-L(e)	0	0	0	0	0	0	[]	Transport
EX_hpdca(e)	0	0	0	0	0	0	[]	Transport
EX_hspg(e)	0	0	0	0	0	0	[]	Transport
EX_hxan(e)	0	0.0269128	0.0134564	0	0.0335507	0.0167754	[]	Transport
EX_i(e)	0	0	0	0	0	0	[]	Transport
EX_idp(e)	0	0	0	0	0	0	[]	Transport
EX_ile-L(e)	-0.00700627	-0.00700627	-0.00700627	-0.00603396	-0.00603396	-0.00603396	[]	Transport
EX_imp(e)	0	0	0	0	0	0	[]	Transport
EX_inost(e)	0	0.0897623	0.0448812	0	0.306892	0.153446	[]	Transport
EX_ins(e)	0	0.0269128	0.0134564	0	0.0335507	0.0167754	[]	Transport
EX_k(e)	0	0	0	0	0	0	[]	Transport
EX_ksi_deg1(e)	0	0	0	0	0	0	[]	Transport
EX_ksi(e)	0	0	0	0	0	0	[]	Transport
EX_ksii_core2(e)	0	0	0	0	0	0	[]	Transport
EX_ksii_core4(e)	0	0	0	0	0	0	[]	Transport
EX_lac-D(e)	0	0.144324	0.0721619	0	0.534566	0.267283	[]	Transport
EX_lac-L(e)	0	0.332296	0.166148	0	0.78181	0.390905	[]	Transport
EX_lcts(e)	0	0.0400028	0.0200014	0	0.14402	0.0720099	[]	Transport
EX_Lcystin(e)	0	0	0	0	0	0	[]	Transport
EX_leu-L(e)	-0.0362216	-0.015674	-0.0259478	-0.0362216	-0.00814034	-0.022181	[]	Transport
EX_leuktrA4(e)	0	0	0	0	0	0	[]	Transport
EX_leuktrB4(e)	0	0	0	0	0	0	[]	Transport
EX_leuktrC4(e)	0	0	0	0	0	0	[]	Transport
EX_leuktrD4(e)	0	0	0	0	0	0	[]	Transport
EX_leuktrE4(e)	0	0	0	0	0	0	[]	Transport
EX_leuktrF4(e)	0	0	0	0	0	0	[]	Transport
EX_lgnc(e)	0	0	0	0	0	0	[]	Transport
EX_lipoate(e)	0	0	0	0	0	0	[]	Transport
EX_lneldc(e)	0	0.0540587	0.0270293	0	0.150593	0.0752967	[]	Transport
EX_lnlc(e)	0	0	0	0	0	0	[]	Transport
EX_lnlnca(e)	0	0	0	0	0	0	[]	Transport
EX_lnlncg(e)	0	0	0	0	0	0	[]	Transport
EX_lpchol_hs(e)	0	0.0190994	0.0095497	0	0.0663472	0.0331736	[]	Transport
EX_lys-L(e)	-0.00949843	-0.00949843	-0.00949843	-0.00781424	-0.00781424	-0.00781424	[]	Transport
EX_mag_hs(e)	0	0.10887	0.0544348	0	0.247389	0.123695	[]	Transport
EX_malt(e)	0	0	0	0	0	0	[]	Transport
EX_man(e)	0	0.0581485	0.0290742	0	0.216011	0.108006	[]	Transport
EX_meoh(e)	0	0.00605264	0.00302632	0	0.0190697	0.00953483	[]	Transport
EX_mepi(e)	0	0	0	0	0	0	[]	Transport
EX_mercplaccys(e)	0	0.00157524	0.000787618	0	0.00104644	0.00052322	[]	Transport
EX_met-L(e)	-0.01	-0.00684953	-0.00842476	-0.01	-0.00790712	-0.00895356	[]	Transport
EX_mthgxl(e)	0	0.144324	0.0721619	0	0.534566	0.267283	[]	Transport
EX_n2m2nmasn(e)	0	0	0	0	0	0	[]	Transport
EX_na1(e)	0	0	0	0	0	0	[]	Transport
EX_nac(e)	0	0	0	0	0	0	[]	Transport
EX_nad(e)	0	0	0	0	0	0	[]	Transport
EX_nadp(e)	0	0	0	0	0	0	[]	Transport
EX_ncam(e)	0	0	0	0	0	0	[]	Transport
EX_nh4(e)	0	0.107651	0.0538255	0	0.134203	0.0671014	[]	Transport
EX_no(e)	0	0.0347789	0.0173894	0	0.117718	0.058859	[]	Transport
EX_npthl(e)	0	0	0	0	0	0	[]	Transport
EX_nrpphr(e)	0	0	0	0	0	0	[]	Transport
EX_nrpphrsf(e)	0	0	0	0	0	0	[]	Transport
EX_nrvnc(e)	0	0	0	0	0	0	[]	Transport
EX_o2(e)	-0.3066	-0.219412	-0.263006	-0.3066	-0.0242041	-0.165402	[]	Transport
EX_o2s(e)	0	0.102305	0.0511523	0	0.301754	0.150877	[]	Transport
EX_oagd3_hs(e)	0	0	0	0	0	0	[]	Transport
EX_oagt3_hs(e)	0	0	0	0	0	0	[]	Transport
EX_ocdca(e)	-0.0949483	-0.00012787	-0.0475381	-0.1	0	-0.05	[]	Transport
EX_ocdcea(e)	-0.0192	-0.000104017	-0.00965201	-0.0192	0	-0.0096	[]	Transport
EX_octa(e)	0	0	0	0	0	0	[]	Transport
EX_oh1	0	0	0	0	0	0	[]	Transport
EX_onpthl(e)	0	0	0	0	0	0	[]	Transport
EX_orn(e)	0	0	0	0	0	0	[]	Transport
EX_oxa(e)	0	0	0	0	0	0	[]	Transport
EX_paf_hs(e)	0	0	0	0	0	0	[]	Transport
EX_pchol_hs(e)	0	0.0165974	0.00829872	0	0.0569584	0.0284792	[]	Transport
EX_pe_hs(e)	0	0.0344693	0.0172347	0	0.108651	0.0543253	[]	Transport
EX_peplys(e)	0	0	0	0	0	0	[]	Transport
EX_pglyc_hs(e)	0	0.0342585	0.0171292	0	0.109024	0.0545121	[]	Transport
EX_phe-L(e)	-0.01	-0.01	-0.01	-0.01	-0.00821768	-0.00910884	[]	Transport
EX_pheme(e)	0	0	0	0	0	0	[]	Transport
EX_phyQ(e)	0	0	0	0	0	0	[]	Transport
EX_phyt(e)	0	0	0	0	0	0	[]	Transport
EX_pi(e)	-0.0997602	-0.00913814	-0.0544492	-0.259484	-0.00967921	-0.134582	[]	Transport
EX_pnto-R(e)	0	0	0	0	0	0	[]	Transport
EX_ppa(e)	0	0	0	0	0	0	[]	Transport
EX_prgstrn(e)	0	0	0	0	0	0	[]	Transport
EX_pro-D(e)	0	0	0	0	0	0	[]	Transport
EX_pro-L(e)	0	0.107651	0.0538255	0	0.134203	0.0671014	[]	Transport
EX_prostgd2(e)	0	0	0	0	0	0	[]	Transport
EX_prostge1(e)	0	0	0	0	0	0	[]	Transport
EX_prostge2(e)	0	0	0	0	0	0	[]	Transport
EX_prostgf2(e)	0	0	0	0	0	0	[]	Transport
EX_ps_hs(e)	0	0.0374667	0.0187333	0	0.11297	0.0564848	[]	Transport
EX_ptdca(e)	0	0	0	0	0	0	[]	Transport
EX_pydam(e)	0	0	0	0	0	0	[]	Transport
EX_pydx(e)	0	0	0	0	0	0	[]	Transport
EX_pydxn(e)	0	0	0	0	0	0	[]	Transport
EX_pyr(e)	-0.0568	0.268217	0.105709	-0.0568	0.605163	0.274182	[]	Transport
EX_retfa(e)	0	0	0	0	0	0	[]	Transport
EX_retinol-9-cis(e)	0	0	0	0	0	0	[]	Transport
EX_retinol-cis-11(e)	0	0	0	0	0	0	[]	Transport
EX_retinol(e)	0	0	0	0	0	0	[]	Transport
EX_retn(e)	0	0	0	0	0	0	[]	Transport
EX_retnglc(e)	0	0	0	0	0	0	[]	Transport
EX_rib-D(e)	0	0	0	0	0	0	[]	Transport
EX_ribflv(e)	0	0	0	0	0	0	[]	Transport
EX_Rtotal(e)	0	0.170022	0.0850109	0	0.258991	0.129495	[]	Transport
EX_Rtotal2(e)	0	0.170022	0.0850109	0	0.258991	0.129495	[]	Transport
EX_Rtotal3(e)	0	0.170022	0.0850109	0	0.258991	0.129495	[]	Transport
EX_s2l2fn2m2masn(e)	0	0	0	0	0	0	[]	Transport
EX_s2l2n2m2masn(e)	0	0	0	0	0	0	[]	Transport
EX_sarcs(e)	0	0	0	0	0	0	[]	Transport
EX_sel(e)	0	0	0	0	0	0	[]	Transport
EX_ser-D(e)	0	0	0	0	0	0	[]	Transport
EX_ser-L(e)	0	0.107651	0.0538255	0	0.134203	0.0671014	[]	Transport
EX_sl-L(e)	0	0	0	0	0	0	[]	Transport
EX_so4(e)	0	0	0	-0.00178232	0	-0.000891162	[]	Transport
EX_spc_hs(e)	0	0.0187791	0.00938953	0	0.064186	0.032093	[]	Transport
EX_sph1p(e)	0	0.0818498	0.0409249	0	0.134203	0.0671014	[]	Transport
EX_sphs1p(e)	0	0.0549312	0.0274656	0	0.134203	0.0671014	[]	Transport
EX_srtn(e)	0	0.00811912	0.00405956	0	0.00851678	0.00425839	[]	Transport
EX_strch1(e)	0	0	0	0	0	0	[]	Transport
EX_strch2(e)	0	0	0	0	0	0	[]	Transport
EX_strdnc(e)	0	0	0	0	0	0	[]	Transport
EX_succ(e)	0	0.284384	0.142192	0	0.297159	0.148579	[]	Transport
EX_tag_hs(e)	0	0.0491037	0.0245519	0	0.0850573	0.0425287	[]	Transport
EX_tagat-D(e)	0	0	0	0	0	0	[]	Transport
EX_taur(e)	0	0.00315047	0.00157524	0	0.00209288	0.00104644	[]	Transport
EX_tchola(e)	0	0	0	0	0	0	[]	Transport
EX_tcynt(e)	0	0	0	0	0	0	[]	Transport
EX_tdchola(e)	0	0	0	0	0	0	[]	Transport
EX_tethex3(e)	0	0	0	0	0	0	[]	Transport
EX_tetpent3(e)	0	0	0	0	0	0	[]	Transport
EX_tetpent6(e)	0	0	0	0	0	0	[]	Transport
EX_tettet6(e)	0	0	0	0	0	0	[]	Transport
EX_thf(e)	0	0	0	0	0	0	[]	Transport
EX_thm(e)	0	0	0	0	0	0	[]	Transport
EX_thmmp(e)	0	0	0	0	0	0	[]	Transport
EX_thmtp(e)	0	0	0	0	0	0	[]	Transport
EX_thr-L(e)	-0.01	-0.00819749	-0.00909875	-0.01	-0.00910556	-0.00955278	[]	Transport
EX_thym(e)	0	0.0481991	0.0240995	0	0.0671014	0.0335507	[]	Transport
EX_thymd(e)	0	0	0	0	0	0	[]	Transport
EX_thyox-L(e)	0	0	0	0	0	0	[]	Transport
EX_tmndnc(e)	0	0	0	0	0	0	[]	Transport
EX_tre(e)	0	0	0	0	0	0	[]	Transport
EX_triodthy(e)	0	0	0	0	0	0	[]	Transport
EX_triodthysuf(e)	0	0	0	0	0	0	[]	Transport
EX_trp-L(e)	-0.01	-0.00188088	-0.00594044	-0.01	-0.00148322	-0.00574161	[]	Transport
EX_tststerone(e)	0	0	0	0	0	0	[]	Transport
EX_tststeroneglc(e)	0	0	0	0	0	0	[]	Transport
EX_tsul(e)	0	0	0	0	0	0	[]	Transport
EX_ttdca(e)	-0.1	-3.67582e-05	-0.0500184	-0.1	0	-0.05	[]	Transport
EX_txa2(e)	0	0	0	0	0	0	[]	Transport
EX_tymsf(e)	0	0	0	0	0.00178232	0.000891162	[]	Transport
EX_Tyr-ggn(e)	0	0	0	0	0	0	[]	Transport
EX_tyr-L(e)	0	0	0	0	0.00178232	0.000891162	[]	Transport
EX_udp(e)	0	0	0	0	0	0	[]	Transport
EX_ump(e)	0	0	0	0	0	0	[]	Transport
EX_ura(e)	0	0.053784	0.026892	0	0.0671014	0.0335507	[]	Transport
EX_urate(e)	0	0	0	0	0	0	[]	Transport
EX_urea(e)	0	0.0687824	0.0343912	0	0.0851923	0.0425961	[]	Transport
EX_uri(e)	0	0.0405508	0.0202754	0	0.0671014	0.0335507	[]	Transport
EX_utp(e)	0	0	0	0	0	0	[]	Transport
EX_vacc(e)	0	0.0894673	0.0447337	0	0.214774	0.107387	[]	Transport
EX_val-L(e)	-0.01	-0.00937304	-0.00968652	-0.01	-0.01	-0.01	[]	Transport
EX_vitd2(e)	0	0	0	0	0	0	[]	Transport
EX_vitd3(e)	0	0.0054876	0.0027438	0	0.0190697	0.00953483	[]	Transport
EX_xolest_hs(e)	0	0.0053465	0.00267325	0	0.0185945	0.00929726	[]	Transport
EX_xoltri24(e)	0	0	0	0	0	0	[]	Transport
EX_xoltri25(e)	0	0	0	0	0	0	[]	Transport
EX_xoltri27(e)	0	0.00488102	0.00244051	0	0.0170516	0.00852582	[]	Transport
EX_xylt(e)	0	0.071116	0.035558	0	0.263948	0.131974	[]	Transport
EX_yvite(e)	0	0	0	0	0	0	[]	Transport
F1Atg	0	0	0	0	0	0	[]	Transport
F1PGT	0	0	0	0	0	0	Transport, Golgi Apparatus	Transport
F6Tg	0	0	0	0	0	0	Fructose and Mannose Metabolism	Glycosylation
FACOAL140i	0	0.0999632	0.0499816	0	0.1	0.05	N-Glycan Biosynthesis	Glycosylation
FACOAL150	0	0	0	0	0	0	Fatty acid activation	FAS
FACOAL160i	0	0.0531382	0.0265691	0	0.151816	0.0759078	Fatty acid activation	FAS
FACOAL161	-0.0925618	-3.29962e-05	-0.0462974	-0.243512	0	-0.121756	Fatty acid activation	FAS
FACOAL170	0	0	0	0	0	0	Fatty acid activation	FAS
FACOAL180i	0	0.0948204	0.0474102	0	0.1	0.05	Fatty acid activation	FAS
FACOAL1812	-0.0894673	0	-0.0447337	-0.214774	0	-0.107387	Fatty acid activation	FAS
FACOAL1813	-0.0894673	0	-0.0447337	-0.214774	0	-0.107387	Fatty acid activation	FAS
FACOAL181i	0	0.019096	0.00954799	0	0.0192	0.0096	Fatty acid activation	FAS
FACOAL1821	0	0	0	0	0	0	Fatty acid activation	FAS
FACOAL1822	-0.0540587	0	-0.0270293	-0.150593	0	-0.0752967	Fatty acid activation	FAS
FACOAL1831	0	0	0	0	0	0	Fatty acid activation	FAS
FACOAL1832	0	0	0	0	0	0	Fatty acid activation	FAS
FACOAL184	0	0	0	0	0	0	Fatty acid activation	FAS
FACOAL191	0	0.164396	0.0821981	0	0.580706	0.290353	Fatty acid activation	FAS
FACOAL200	0	0	0	0	0	0	Fatty acid activation	FAS
FACOAL203	0	0	0	0	0	0	Fatty acid activation	FAS
FACOAL204	0	0	0	0	0	0	Fatty acid activation	FAS
FACOAL2042	0	0	0	0	0	0	Fatty acid activation	FAS
FACOAL204i	0	0	0	0	0	0	Fatty acid activation	FAS
FACOAL205	0	0	0	0	0	0	Fatty acid activation	FAS
FACOAL206	0	0	0	0	0	0	Fatty acid activation	FAS
FACOAL224	0	0	0	0	0	0	Fatty acid activation	FAS
FACOAL2251	0	0	0	0	0	0	Fatty acid activation	FAS
FACOAL2252	0	0	0	0	0	0	Fatty acid activation	FAS
FACOAL226	0	0	0	0	0	0	Fatty acid activation	FAS
FACOAL226i	0	0	0	0	0	0	Fatty acid activation	FAS
FACOAL240	0	0	0	0	0	0	Fatty acid activation	FAS
FACOAL241	0	0	0	0	0	0	Fatty acid activation	FAS
FACOAL244_1	0	0	0	0	0	0	Fatty acid activation	FAS
FACOAL245_1	0	0	0	0	0	0	Fatty acid activation	FAS
FACOAL245_2	0	0	0	0	0	0	Fatty acid activation	FAS
FACOAL246_1	0	0	0	0	0	0	Fatty acid activation	FAS
FACOAL260	0	0	0	0	0	0	Fatty acid activation	FAS
FACOAL80i	0	0	0	0	0	0	Fatty acid activation	FAS
FADH2tru	0.000565042	0.00605264	0.00330884	0	0.0190697	0.00953483	Fatty acid activation	FAS
FADH2tx	0	0	0	0	0	0	Transport, Endoplasmic Reticular	Transport
FADtru	0.000565042	0.00605264	0.00330884	0	0.0190697	0.00953483	Transport, Peroxisomal	Transport
FADtx	0	0	0	0	0	0	Transport, Endoplasmic Reticular	Transport
FALDH	-0.00605264	0	-0.00302632	-0.0190697	0	-0.00953483	Transport, Peroxisomal	Transport
FALDtly	0	0.159093	0.0795466	0	0.452631	0.226315	Tyrosine metabolism	Amino Acids
FALDtm	0	0	0	0	0	0	Transport, Lysosomal	Transport
FAOXC11	0	0	0	0	0	0	Transport, Mitochondrial	Transport
FAOXC140	0	0.0399866	0.0199933	0	0.0399866	0.0199933	Fatty acid oxidation	UFAS
FAOXC150m	0	0	0	0	0	0	Fatty acid oxidation	UFAS
FAOXC160	0	0.0740729	0.0370364	0	0.130718	0.0653591	Fatty acid oxidation	UFAS
FAOXC16080m	0	0.0740729	0.0370364	0	0.130718	0.0653591	Fatty acid oxidation	UFAS
FAOXC16080x	0	0	0	0	0	0	Fatty acid oxidation	UFAS
FAOXC161802m	0	0.0399866	0.0199933	0	0.0399866	0.0199933	Fatty acid oxidation, peroxisome	UFAS
FAOXC16180m	0	0.0399866	0.0199933	0	0.0399866	0.0199933	Fatty acid activation	FAS
FAOXC170m	0	0	0	0	0	0	Fatty acid oxidation	UFAS
FAOXC180	0	0.0644223	0.0322111	0	0.114378	0.0571892	Fatty acid oxidation	UFAS
FAOXC180x	0	0	0	0	0	0	Fatty acid oxidation	UFAS
FAOXC1811601m	0	0.0399866	0.0199933	0	0.0399866	0.0199933	Fatty acid oxidation, peroxisome	UFAS
FAOXC1811602m	0	0.0399866	0.0199933	0	0.0399866	0.0199933	Fatty acid oxidation	UFAS
FAOXC1811603m	0	0.0526093	0.0263047	0	0.103803	0.0519015	Fatty acid oxidation	UFAS
FAOXC182806m	0	0	0	0	0	0	Fatty acid oxidation	UFAS
FAOXC18280m	0	0.0399866	0.0199933	0	0.0399866	0.0199933	Fatty acid oxidation	UFAS
FAOXC183803m	0	0	0	0	0	0	Fatty acid oxidation	UFAS
FAOXC183806m	0	0	0	0	0	0	Fatty acid oxidation	UFAS
FAOXC183806x	0	0	0	0	0	0	Fatty acid oxidation	UFAS
FAOXC18480m	0	0	0	0	0	0	Fatty acid oxidation, peroxisome	UFAS
FAOXC18480x	0	0	0	0	0	0	Fatty acid oxidation	UFAS
FAOXC200180m	0	0	0	0	0	0	Fatty acid oxidation, peroxisome	UFAS
FAOXC200180x	0	0	0	0	0	0	Fatty acid oxidation	UFAS
FAOXC2031836m	0	0	0	0	0	0	Fatty acid oxidation, peroxisome	UFAS
FAOXC204	0	0	0	0	0	0	Fatty acid oxidation	UFAS
FAOXC204184m	0	0	0	0	0	0	Fatty acid oxidation	UFAS
FAOXC2051843m	0	0	0	0	0	0	Fatty acid oxidation	UFAS
FAOXC2051843x	0	0	0	0	0	0	Fatty acid oxidation	UFAS
FAOXC2242046m	0	0	0	0	0	0	Fatty acid oxidation, peroxisome	UFAS
FAOXC2242046x	0	0	0	0	0	0	Fatty acid oxidation	UFAS
FAOXC2251836m	0	0	0	0	0	0	Fatty acid oxidation, peroxisome	UFAS
FAOXC2251836x	0	0	0	0	0	0	Fatty acid oxidation	UFAS
FAOXC2252053m	0	0	0	0	0	0	Fatty acid oxidation, peroxisome	UFAS
FAOXC2252053x	0	0	0	0	0	0	Fatty acid oxidation	UFAS
FAOXC226	0	0	0	0	0	0	Fatty acid oxidation, peroxisome	UFAS
FAOXC226205m	0	0	0	0	0	0	Fatty acid oxidation	UFAS
FAOXC226205x	0	0	0	0	0	0	Fatty acid oxidation	UFAS
FAOXC240200x	0	0	0	0	0	0	Fatty acid oxidation, peroxisome	UFAS
FAOXC241181x	0	0	0	0	0	0	Fatty acid oxidation, peroxisome	UFAS
FAOXC2442246x	0	0	0	0	0	0	Fatty acid oxidation, peroxisome	UFAS
FAOXC2452253x	0	0	0	0	0	0	Fatty acid oxidation, peroxisome	UFAS
FAOXC2452256x	0	0	0	0	0	0	Fatty acid oxidation, peroxisome	UFAS
FAOXC246226x	0	0	0	0	0	0	Fatty acid oxidation, peroxisome	UFAS
FAOXC260240x	0	0	0	0	0	0	Fatty acid oxidation, peroxisome	UFAS
FAOXC80	0	0.0740729	0.0370364	0	0.200779	0.10039	Fatty acid oxidation, peroxisome	UFAS
FAS100COA	0	0.0264415	0.0132207	0	0.0858908	0.0429454	Fatty acid oxidation	UFAS
FAS120COA	0	0.0264415	0.0132207	0	0.0858908	0.0429454	Fatty acid elongation	FAS
FAS140COA	0	0.0264415	0.0132207	0	0.0858908	0.0429454	Fatty acid elongation	FAS
FAS160COA	0	0.0861442	0.0430721	0	0.152736	0.076368	Fatty acid elongation	FAS
FAS180COA	0	0.0996358	0.0498179	0	0.254544	0.127272	Fatty acid elongation	FAS
FAS80COA_L	0	0.049817	0.0249085	0	0.175972	0.0879858	Fatty acid elongation	FAS
FATP1t	0	0	0	0	0	0	Fatty acid elongation	FAS
FATP2t	0	0	0	0	0	0	Transport, Extracellular	Transport
FATP3t	-0.00012787	-0.00012787	-0.00012787	0	0	0	Transport, Extracellular	Transport
FATP4t	0	0	0	0	0	0	Transport, Extracellular	Transport
FATP5t	0	0	0	0	0	0	Transport, Extracellular	Transport
FATP6t	0	0	0	0	0	0	Transport, Extracellular	Transport
FATP7t	0	0	0	0	0	0	Transport, Extracellular	Transport
FATP8t	0	0	0	0	0	0	Transport, Extracellular	Transport
FATP9t	0	0	0	0	0	0	Transport, Extracellular	Transport
FBA	-0.245128	0.110336	-0.0673961	-0.583932	0.265348	-0.159292	Transport, Extracellular	Transport
FBA2	0	0.355464	0.177732	0	0.84928	0.42464	Glycolysis/Gluconeogenesis	Central Metabolism
FBA4	0	0	0	0	0	0	Fructose and Mannose Metabolism	Glycosylation
FBP	0	0.328792	0.164396	0	1.10793	0.553965	Glyoxylate and Dicarboxylate Metabolism	Central Metabolism
FBP26	0	0.328792	0.164396	0	1.16141	0.580706	Glycolysis/Gluconeogenesis	Central Metabolism
FCLTm	0	0	0	0	0	0	Fructose and Mannose Metabolism	Glycosylation
FE2t	0	0	0	0	0	0	Heme Biosynthesis	Heme
FE2tm	0	0	0	0	0	0	Transport, Extracellular	Transport
FK	0	0	0	0	0	0	Transport, Mitochondrial	Transport
FMNAT	0	0	0	0	0	0	Fructose and Mannose Metabolism	Glycosylation
FOLR2	0	0	0	0	0	0	Riboflavin Metabolism	Vitamins
FOLt2	0	0	0	0	0	0	Folate Metabolism	Vitamins
FORt2m	-0.00597075	0	-0.00298538	-0.0187853	0	-0.00939263	Transport, Extracellular	Transport
FORtr	-0.00605264	-0.000565042	-0.00330884	-0.0190697	0	-0.00953483	Transport, Mitochondrial	Transport
FORtrn	0	0	0	0	0	0	Transport, Endoplasmic Reticular	Transport
FPGS	0	0.0821981	0.0410991	0	0.290353	0.145177	Transport, Nuclear	Transport
FPGS2	0	0.0657585	0.0328792	0	0.232282	0.116141	Folate Metabolism	Vitamins
FPGS2m	0	0.0657585	0.0328792	0	0.232282	0.116141	Folate Metabolism	Vitamins
FPGS3	0	0.0547987	0.0273994	0	0.193569	0.0967844	Folate Metabolism	Vitamins
FPGS3m	0	0.0547987	0.0273994	0	0.193569	0.0967844	Folate Metabolism	Vitamins
FPGS4	0	0.0821981	0.0410991	0	0.290353	0.145177	Folate Metabolism	Vitamins
FPGS4m	0	0.0657585	0.0328792	0	0.232282	0.116141	Folate Metabolism	Vitamins
FPGS5	0	0.0657585	0.0328792	0	0.232282	0.116141	Folate Metabolism	Vitamins
FPGS5m	0	0.0657585	0.0328792	0	0.232282	0.116141	Folate Metabolism	Vitamins
FPGS6	0	0.0547987	0.0273994	0	0.193569	0.0967844	Folate Metabolism	Vitamins
FPGS6m	0	0.0547987	0.0273994	0	0.193569	0.0967844	Folate Metabolism	Vitamins
FPGS7	0	0.0821981	0.0410991	0	0.290353	0.145177	Folate Metabolism	Vitamins
FPGS7m	0	0.0821981	0.0410991	0	0.290353	0.145177	Folate Metabolism	Vitamins
FPGS8	0	0.0657585	0.0328792	0	0.232282	0.116141	Folate Metabolism	Vitamins
FPGS8m	0	0.0657585	0.0328792	0	0.232282	0.116141	Folate Metabolism	Vitamins
FPGS9	0	0.0547987	0.0273994	0	0.193569	0.0967844	Folate Metabolism	Vitamins
FPGS9m	0	0.0547987	0.0273994	0	0.193569	0.0967844	Folate Metabolism	Vitamins
FPGSm	0	0.0821981	0.0410991	0	0.290353	0.145177	Folate Metabolism	Vitamins
FRDPtc	0	0	0	0	0	0	Folate Metabolism	Vitamins
FRDPtr	0.00113008	0.0121053	0.00661769	0	0.0381393	0.0190697	Transport, Peroxisomal	Transport
FRTT	0	0	0	0	0	0	Transport, Peroxisomal	Transport
FRUt1r	0	0	0	0	0	0	Cholesterol Metabolism	Steriods
FRUt4	0	0	0	0	0	0	Transport, Extracellular	Transport
FT	0	0	0	0	0	0	Transport, Extracellular	Transport
FTCD	0	0.00584639	0.0029232	0	0.00585106	0.00292553	N-Glycan Biosynthesis	Glycosylation
FTHFCL	0	0	0	0	0	0	Folate Metabolism	Vitamins
FTHFDH	0	0.270913	0.135456	0	0.441403	0.220701	Folate Metabolism	Vitamins
FTHFL	0	0.00593184	0.00296592	0	0.0186698	0.0093349	Folate Metabolism	Vitamins
FTHFLm	0	0.00597075	0.00298538	0	0.0187853	0.00939263	Folate Metabolism	Vitamins
FUC13GALACGLCGAL14ACGLCGALGLUSIDEte	0	0	0	0	0	0	Folate Metabolism	Vitamins
FUC13GALACGLCGAL14ACGLCGALGLUSIDEtg	0	0	0	0	0	0	Transport, Extracellular	Transport
FUC14GALACGLCGALGLUSIDEte	0	0	0	0	0	0	Transport, Golgi Apparatus	Transport
FUC14GALACGLCGALGLUSIDEtg	0	0	0	0	0	0	Transport, Extracellular	Transport
FUCACGALFUCGALACGLCGALGLUSIDEte	0	0	0	0	0	0	Transport, Golgi Apparatus	Transport
FUCACGALFUCGALACGLCGALGLUSIDEtg	0	0	0	0	0	0	Transport, Extracellular	Transport
FUCACNGAL14ACGLCGALGLUSIDEte	0	0	0	0	0	0	Transport, Golgi Apparatus	Transport
FUCACNGAL14ACGLCGALGLUSIDEtg	0	0	0	0	0	0	Transport, Extracellular	Transport
FUCACNGALACGLCGALGLUSIDEte	0	0	0	0	0	0	Transport, Golgi Apparatus	Transport
FUCACNGALACGLCGALGLUSIDEtg	0	0	0	0	0	0	Transport, Extracellular	Transport
FUCASE2e	0	0	0	0	0	0	Transport, Golgi Apparatus	Transport
FUCASE2ly	0	0	0	0	0	0	Keratan sulfate degradation	Glycosylation
FUCASEe	0	0	0	0	0	0	Keratan sulfate degradation	Glycosylation
FUCASEly	0	0	0	0	0	0	N-Glycan Degradation	Glycosylation
FUCFUC12GAL14ACGLCGALGLUSIDEte	0	0	0	0	0	0	N-Glycan Degradation	Glycosylation
FUCFUC12GAL14ACGLCGALGLUSIDEtg	0	0	0	0	0	0	Transport, Extracellular	Transport
FUCFUC132GALACGLCGAL14ACGLCGALGLUSIDEte	0	0	0	0	0	0	Transport, Golgi Apparatus	Transport
FUCFUC132GALACGLCGAL14ACGLCGALGLUSIDEtg	0	0	0	0	0	0	Transport, Extracellular	Transport
FUCFUCFUCGALACGLC13GALACGLCGAL14ACGLCGALGLUSIDEte	0	0	0	0	0	0	Transport, Golgi Apparatus	Transport
FUCFUCFUCGALACGLC13GALACGLCGAL14ACGLCGALGLUSIDEtg	0	0	0	0	0	0	Transport, Extracellular	Transport
FUCFUCFUCGALACGLCGAL14ACGLCGALGLUSIDEte	0	0	0	0	0	0	Transport, Golgi Apparatus	Transport
FUCFUCFUCGALACGLCGAL14ACGLCGALGLUSIDEtg	0	0	0	0	0	0	Transport, Extracellular	Transport
FUCFUCGALACGLCGALGLUSIDEte	0	0	0	0	0	0	Transport, Golgi Apparatus	Transport
FUCFUCGALACGLCGALGLUSIDEtg	0	0	0	0	0	0	Transport, Extracellular	Transport
FUCGAL14ACGLCGALGLUSIDEte	0	0	0	0	0	0	Transport, Golgi Apparatus	Transport
FUCGAL14ACGLCGALGLUSIDEtg	0	0	0	0	0	0	Transport, Extracellular	Transport
FUCGALFUCGALACGLCGALGLUSIDEte	0	0	0	0	0	0	Transport, Golgi Apparatus	Transport
FUCGALFUCGALACGLCGALGLUSIDEtg	0	0	0	0	0	0	Transport, Extracellular	Transport
FUCGALGBSIDEte	0	0	0	0	0	0	Transport, Golgi Apparatus	Transport
FUCGALGBSIDEtg	0	0	0	0	0	0	Transport, Extracellular	Transport
FUCtly	0	0	0	0	0	0	Transport, Golgi Apparatus	Transport
FUM	-0.0511553	-0.0828598	-0.0670076	-0.0389228	-0.104418	-0.0716702	Transport, Lysosomal	Transport
FUMAC	0	0	0	0	0	0	Citric Acid Cycle	Central Metabolism
FUMm	0.0820454	0.132787	0.107416	0.0737516	0.126231	0.0999913	Tyrosine metabolism	Amino Acids
FUMSO3tm	0	0	0	0	0	0	Citric Acid Cycle	Central Metabolism
FUMSO4tm	0	0	0	0	0	0	Transport, Mitochondrial	Transport
FUMtm	0.0652273	0.088231	0.0767292	0.025541	0.111674	0.0686074	Transport, Mitochondrial	Transport
FUMTSULtm	0	0	0	0	0	0	Transport, Mitochondrial	Transport
FUT11g	0	0	0	0	0	0	Transport, Mitochondrial	Transport
FUT12g	0	0	0	0	0	0	Sphingolipid Metabolism	Lipids
FUT14g	0	0	0	0	0	0	Blood Group Biosynthesis	Heme
FUT15g	0	0	0	0	0	0	Blood Group Biosynthesis	Heme
FUT16g	0	0	0	0	0	0	Blood Group Biosynthesis	Heme
FUT17g	0	0	0	0	0	0	Blood Group Biosynthesis	Heme
FUT18g	0	0	0	0	0	0	Blood Group Biosynthesis	Heme
FUT31g	0	0	0	0	0	0	Blood Group Biosynthesis	Heme
FUT32g	0	0	0	0	0	0	Blood Group Biosynthesis	Heme
FUT33g	0	0	0	0	0	0	Blood Group Biosynthesis	Heme
FUT34g	0	0	0	0	0	0	Blood Group Biosynthesis	Heme
FUT35g	0	0	0	0	0	0	Blood Group Biosynthesis	Heme
FUT910g	0	0	0	0	0	0	Blood Group Biosynthesis	Heme
FUT911g	0	0	0	0	0	0	Blood Group Biosynthesis	Heme
FUT91g	0	0	0	0	0	0	Blood Group Biosynthesis	Heme
FUT92g	0	0	0	0	0	0	Blood Group Biosynthesis	Heme
FUT93g	0	0	0	0	0	0	Blood Group Biosynthesis	Heme
FUT94g	0	0	0	0	0	0	Blood Group Biosynthesis	Heme
FUT95g	0	0	0	0	0	0	Blood Group Biosynthesis	Heme
FUT96g	0	0	0	0	0	0	Blood Group Biosynthesis	Heme
FUT97g	0	0	0	0	0	0	Blood Group Biosynthesis	Heme
FUT98g	0	0	0	0	0	0	Blood Group Biosynthesis	Heme
FUT99g	0	0	0	0	0	0	Blood Group Biosynthesis	Heme
G12MT1_L	0	0.0113377	0.00566884	0	0.0400487	0.0200244	Blood Group Biosynthesis	Heme
G12MT1_U	0	0.0113377	0.00566884	0	0.0400487	0.0200244	N-Glycan Biosynthesis	Glycosylation
G12MT2_L	0	0.0113377	0.00566884	0	0.0400487	0.0200244	N-Glycan Biosynthesis	Glycosylation
G12MT2_U	0	0.0113377	0.00566884	0	0.0400487	0.0200244	N-Glycan Biosynthesis	Glycosylation
G13MT_L	0	0.0113377	0.00566884	0	0.0400487	0.0200244	N-Glycan Biosynthesis	Glycosylation
G13MT_U	0	0.0113377	0.00566884	0	0.0400487	0.0200244	N-Glycan Biosynthesis	Glycosylation
G14T10g	0	0	0	0	0	0	N-Glycan Biosynthesis	Glycosylation
G14T11g	0	0	0	0	0	0	Keratan sulfate biosynthesis	Glycosylation
G14T12g	0	0	0	0	0	0	Keratan sulfate biosynthesis	Glycosylation
G14T13g	0	0	0	0	0	0	Keratan sulfate biosynthesis	Glycosylation
G14T14g	0	0	0	0	0	0	Keratan sulfate biosynthesis	Glycosylation
G14T15g	0	0	0	0	0	0	Keratan sulfate biosynthesis	Glycosylation
G14T16g	0	0	0	0	0	0	Keratan sulfate biosynthesis	Glycosylation
G14T17g	0	0	0	0	0	0	Keratan sulfate biosynthesis	Glycosylation
G14T18g	0	0	0	0	0	0	Keratan sulfate biosynthesis	Glycosylation
G14T19g	0	0	0	0	0	0	Keratan sulfate biosynthesis	Glycosylation
G14T20g	0	0	0	0	0	0	Keratan sulfate biosynthesis	Glycosylation
G14T21g	0	0	0	0	0	0	Keratan sulfate biosynthesis	Glycosylation
G14T2g	0	0.00756134	0.00378067	0	0.0267094	0.0133547	Keratan sulfate biosynthesis	Glycosylation
G14T3g	0	0.00756134	0.00378067	0	0.0267094	0.0133547	Keratan sulfate biosynthesis	Glycosylation
G14T4g	0	0.00756134	0.00378067	0	0.0267094	0.0133547	Keratan sulfate biosynthesis	Glycosylation
G14T5g	0	0.00756134	0.00378067	0	0.0267094	0.0133547	Keratan sulfate biosynthesis	Glycosylation
G14T6g	0	0	0	0	0	0	Keratan sulfate biosynthesis	Glycosylation
G14T7g	0	0	0	0	0	0	Keratan sulfate biosynthesis	Glycosylation
G14T8g	0	0	0	0	0	0	Keratan sulfate biosynthesis	Glycosylation
G14T9g	0	0	0	0	0	0	Keratan sulfate biosynthesis	Glycosylation
G14Tg	0	0	0	0	0	0	Keratan sulfate biosynthesis	Glycosylation
G16MT_L	0	0.0113377	0.00566884	0	0.0400487	0.0200244	N-Glycan Biosynthesis	Glycosylation
G16MT_U	0	0.0113377	0.00566884	0	0.0400487	0.0200244	N-Glycan Biosynthesis	Glycosylation
G1M6MASNB1terg	0	0	0	0	0	0	N-Glycan Biosynthesis	Glycosylation
G1M7MASNBterg	0	0	0	0	0	0	N-Glycan Biosynthesis	Glycosylation
G1M7MASNCterg	0	0	0	0	0	0	N-Glycan Biosynthesis	Glycosylation
G1M8MASNterg	0	0	0	0	0	0	N-Glycan Biosynthesis	Glycosylation
G2M8MASNterg	0	0	0	0	0	0	N-Glycan Biosynthesis	Glycosylation
G3M8MASNterg	0	0	0	0	0	0	N-Glycan Biosynthesis	Glycosylation
G3PD1	-0.546432	-0.00251454	-0.274473	-1.03701	0	-0.518507	N-Glycan Biosynthesis	Glycosylation
G3PD2m	0	0.543918	0.271959	0	0.915028	0.457514	Glycerophospholipid Metabolism	Lipids
G5SADrm	0.00935737	0.425947	0.217652	0.00899182	1.46986	0.739424	Glycolysis/Gluconeogenesis	Central Metabolism
G5SADs	0	0	0	0	0	0	Arginine and Proline Metabolism	Amino Acids
G5SDym	0	0.410991	0.205495	0	1.45177	0.725883	Urea cycle/amino group metabolism	Amino Acids
G6PDA	0	0.379999	0.19	0	1.2103	0.605148	Urea cycle/amino group metabolism	Amino Acids
G6PDH1er	0	1.70529	0.852647	0	1.70529	0.852647	Aminosugar Metabolism	Glycosylation
G6PDH1rer	0	-1.70642	-0.853212	0	-1.70529	-0.852647	Pentose Phosphate Pathway	Central Metabolism
G6PDH2r	0	0.36514	0.18257	0	0.650427	0.325214	Pentose Phosphate Pathway	Central Metabolism
G6PDH2rer	0	0.00113008	0.000565042	0	0	0	Pentose Phosphate Pathway	Central Metabolism
G6PPer	0	0.328792	0.164396	0	1.16141	0.580706	Pentose Phosphate Pathway	Central Metabolism
G6Pter	0	0.328792	0.164396	0	1.16141	0.580706	Glycolysis/Gluconeogenesis	Central Metabolism
GABAVESSEC	0	0.328792	0.164396	0	1.16141	0.580706	Transport, Endoplasmic Reticular	Transport
GACMTRc	0	0.046052	0.023026	0	0.0575649	0.0287825	Transport, Extracellular	Transport
GACPAILter	0	0	0	0	0	0	Urea cycle/amino group metabolism	Amino Acids
GALACGLCGALGBSIDEte	0	0	0	0	0	0	Transport, Endoplasmic Reticular	Transport
GALASE10ly	0	0	0	0	0	0	Transport, Extracellular	Transport
GALASE11ly	0	0	0	0	0	0	Keratan sulfate degradation	Glycosylation
GALASE12ly	0	0	0	0	0	0	Keratan sulfate degradation	Glycosylation
GALASE13ly	0	0	0	0	0	0	Keratan sulfate degradation	Glycosylation
GALASE14ly	0	0	0	0	0	0	Keratan sulfate degradation	Glycosylation
GALASE15ly	0	0	0	0	0	0	Keratan sulfate degradation	Glycosylation
GALASE16ly	0	0.00756134	0.00378067	0	0.0267094	0.0133547	Keratan sulfate degradation	Glycosylation
GALASE17ly	0	0.00756134	0.00378067	0	0.0267094	0.0133547	Keratan sulfate degradation	Glycosylation
GALASE18ly	0	0.00756134	0.00378067	0	0.0267094	0.0133547	Keratan sulfate degradation	Glycosylation
GALASE19ly	0	0.00756134	0.00378067	0	0.0267094	0.0133547	Keratan sulfate degradation	Glycosylation
GALASE1ly	0	0	0	0	0	0	Keratan sulfate degradation	Glycosylation
GALASE20ly	0	0	0	0	0	0	N-Glycan Degradation	Glycosylation
GALASE3ly	0	0	0	0	0	0	Keratan sulfate degradation	Glycosylation
GALASE4ly	0	0	0	0	0	0	Keratan sulfate degradation	Glycosylation
GALASE5ly	0	0	0	0	0	0	Keratan sulfate degradation	Glycosylation
GALASE6ly	0	0	0	0	0	0	Keratan sulfate degradation	Glycosylation
GALASE7ly	0	0	0	0	0	0	Keratan sulfate degradation	Glycosylation
GALASE8ly	0	0	0	0	0	0	Keratan sulfate degradation	Glycosylation
GALASE9ly	0	0	0	0	0	0	Keratan sulfate degradation	Glycosylation
GALC	0	0	0	0	0	0	Keratan sulfate degradation	Glycosylation
GALFUC12GAL14ACGLCGALGLUSIDEte	0	0	0	0	0	0	Sphingolipid Metabolism	Lipids
GALFUC12GAL14ACGLCGALGLUSIDEtg	0	0	0	0	0	0	Transport, Extracellular	Transport
GALFUCGALACGLCGAL14ACGLCGALGLUSIDEte	0	0	0	0	0	0	Transport, Golgi Apparatus	Transport
GALFUCGALACGLCGAL14ACGLCGALGLUSIDEtg	0	0	0	0	0	0	Transport, Extracellular	Transport
GALGALFUCFUCGALACGLCGALACGLCGAL14ACGLCGALGLUSIDEte	0	0	0	0	0	0	Transport, Golgi Apparatus	Transport
GALGALFUCFUCGALACGLCGALACGLCGAL14ACGLCGALGLUSIDEtg	0	0	0	0	0	0	Transport, Extracellular	Transport
GALGALGALTHCRMte	0	0	0	0	0	0	Transport, Golgi Apparatus	Transport
GALGLUSIDEtg	0	0	0	0	0	0	Transport, Extracellular	Transport
GALGLUSIDEtl	0	0	0	0	0	0	Transport, Golgi Apparatus	Transport
GALK	0	0.109597	0.0547987	0	0.387137	0.193569	Transport, Lysosomal	Transport
GALNACT1g	0	0	0	0	0	0	Galactose metabolism	Glycosylation
GALNACT2g	0	0	0	0	0	0	Chondroitin / heparan sulfate biosynthesis	Glycosylation
GALNACT3g	0	0	0	0	0	0	Chondroitin / heparan sulfate biosynthesis	Glycosylation
GALNACT4g	0	0	0	0	0	0	Chondroitin / heparan sulfate biosynthesis	Glycosylation
GALNACT5g	0	0	0	0	0	0	Chondroitin / heparan sulfate biosynthesis	Glycosylation
GALNTg	0	0.00756134	0.00378067	0	0.0267094	0.0133547	Chondroitin / heparan sulfate biosynthesis	Glycosylation
GALOR	0	0	0	0	0	0	O-Glycan Biosynthesis	Glycosylation
GALSIDEtl	0	0	0	0	0	0	Galactose metabolism	Glycosylation
GALT	0	0	0	0	0	0	Transport, Lysosomal	Transport
GALt1r	0	0	0	0	0	0	Galactose metabolism	Glycosylation
GALt2_2	0	0	0	0	0	0	Transport, Extracellular	Transport
GALT2g	0	0	0	0	0	0	Transport, Extracellular	Transport
GALt4	0	0	0	0	0	0	Chondroitin / heparan sulfate biosynthesis	Glycosylation
GALt4_2	0	0	0	0	0	0	Transport, Extracellular	Transport
GALTg	0	0	0	0	0	0	Transport, Extracellular	Transport
GALtly	0	0.0378067	0.0189034	0	0.133547	0.0667734	Chondroitin / heparan sulfate biosynthesis	Glycosylation
GALU	0.156798	0.202166	0.179482	0	0.160256	0.0801281	Transport, Lysosomal	Transport
GAMt1r	0	0	0	0	0	0	Galactose metabolism	Glycosylation
GAMYe	0	0	0	0	0	0	Transport, Extracellular	Transport
GAO1	0	0	0	0	0	0	Starch and Sucrose Metabolism	Glycogen
GAO1g	0	0	0	0	0	0	Sphingolipid Metabolism	Lipids
GAO2	0	0	0	0	0	0	Sphingolipid Metabolism	Lipids
GAO2g	0	0	0	0	0	0	Sphingolipid Metabolism	Lipids
GAPD	-0.0232111	0.215875	0.096332	-0.22219	0.527471	0.15264	Sphingolipid Metabolism	Lipids
GARFT	0.00347723	0.03039	0.0169336	0.00483879	0.0383895	0.0216141	Glycolysis/Gluconeogenesis	Central Metabolism
GASNASE2ly	0	0.0113377	0.00566884	0	0.0400487	0.0200244	IMP Biosynthesis	Nucleotides
GASNASE3ly	0	0	0	0	0	0	N-Glycan Degradation	Glycosylation
GASNASEly	0	0	0	0	0	0	Keratan sulfate degradation	Glycosylation
GBA	0	0.109597	0.0547987	0	0.387137	0.193569	N-Glycan Degradation	Glycosylation
GBAl	0	0	0	0	0	0	Sphingolipid Metabolism	Lipids
GBGT1	0	0	0	0	0	0	Sphingolipid Metabolism	Lipids
GBSIDEte	0	0	0	0	0	0	Sphingolipid Metabolism	Lipids
GBSIDEtl	0	0	0	0	0	0	Transport, Extracellular	Transport
GCALDD	0	0	0	0	0	0	Transport, Lysosomal	Transport
GCALDDm	0	0	0	0	0	0	Glyoxylate and Dicarboxylate Metabolism	Central Metabolism
GCC2am	0	0.129594	0.0647969	0	0.23476	0.11738	Glyoxylate and Dicarboxylate Metabolism	Central Metabolism
GCC2bim	0	0.129594	0.0647969	0	0.23476	0.11738	Glycine, Serine, and Threonine Metabolism	Amino Acids
GCC2cm	0	0.129594	0.0647969	0	0.23476	0.11738	Glycine, Serine, and Threonine Metabolism	Amino Acids
GCCam	0	0.129594	0.0647969	0	0.23476	0.11738	Glycine, Serine, and Threonine Metabolism	Amino Acids
GCCbim	0	0.129594	0.0647969	0	0.23476	0.11738	Glycine, Serine, and Threonine Metabolism	Amino Acids
GCCcm	0	0.129594	0.0647969	0	0.23476	0.11738	Glycine, Serine, and Threonine Metabolism	Amino Acids
GCHOLAt	-10	0.332375	-4.83381	-10	0.317681	-4.84116	Glycine, Serine, and Threonine Metabolism	Amino Acids
GCHOLAt2	0	0	0	0	0	0	Transport, Extracellular	Transport
GCHOLAt3	0	0.328792	0.164396	0	1.16141	0.580706	Transport, Extracellular	Transport
GCHOLAte	10	-0.0316189	4.98419	10	0.806801	5.4034	Transport, Extracellular	Transport
GCHOLAtx	0	0	0	0	0	0	Transport, Extracellular	Transport
GCNTg	0	0	0	0	0	0	Transport, Peroxisomal	Transport
GD1B2te	0	0	0	0	0	0	Blood Group Biosynthesis	Heme
GD1B2tg	0	0	0	0	0	0	Transport, Extracellular	Transport
GD1Cte	0	0	0	0	0	0	Transport, Golgi Apparatus	Transport
GD1Ctg	0	0	0	0	0	0	Transport, Extracellular	Transport
GDCHOLAte	0	0	0	0	0	0	Transport, Golgi Apparatus	Transport
GDPFUCtg	0	0	0	0	0	0	Transport, Extracellular	Transport
GDPtg	0	0	0	0	0	0	Transport, Golgi Apparatus	Transport
GF6PTA	0	0.379999	0.19	0	1.2103	0.605148	Transport, Golgi Apparatus	Transport
GFUCS	0	0	0	0	0	0	Aminosugar Metabolism	Glycosylation
GGH-10FTHF5GLUe	0	0	0	0	0	0	Fructose and Mannose Metabolism	Glycosylation
GGH-10FTHF5GLUl	0	0.0821981	0.0410991	0	0.290353	0.145177	Folate Metabolism	Vitamins
GGH-10FTHF6GLUe	0	0	0	0	0	0	Folate Metabolism	Vitamins
GGH-10FTHF6GLUl	0	0.0657585	0.0328792	0	0.232282	0.116141	Folate Metabolism	Vitamins
GGH-10FTHF7GLUe	0	0	0	0	0	0	Folate Metabolism	Vitamins
GGH-10FTHF7GLUl	0	0.0547987	0.0273994	0	0.193569	0.0967844	Folate Metabolism	Vitamins
GGH-5DHFe	0	0	0	0	0	0	Folate Metabolism	Vitamins
GGH-5DHFl	0	0.0821981	0.0410991	0	0.290353	0.145177	Folate Metabolism	Vitamins
GGH-5THFe	0	0	0	0	0	0	Folate Metabolism	Vitamins
GGH-5THFl	0	0.0821981	0.0410991	0	0.290353	0.145177	Folate Metabolism	Vitamins
GGH-6DHFe	0	0	0	0	0	0	Folate Metabolism	Vitamins
GGH-6DHFl	0	0.0657585	0.0328792	0	0.232282	0.116141	Folate Metabolism	Vitamins
GGH-6THFe	0	0	0	0	0	0	Folate Metabolism	Vitamins
GGH-6THFl	0	0.0657585	0.0328792	0	0.232282	0.116141	Folate Metabolism	Vitamins
GGH-7DHFe	0	0	0	0	0	0	Folate Metabolism	Vitamins
GGH-7DHFl	0	0.0547987	0.0273994	0	0.193569	0.0967844	Folate Metabolism	Vitamins
GGH-7THFe	0	0	0	0	0	0	Folate Metabolism	Vitamins
GGH-7THFl	0	0.0547987	0.0273994	0	0.193569	0.0967844	Folate Metabolism	Vitamins
GGLUCT	0	0.109597	0.0547987	0	0.387137	0.193569	Folate Metabolism	Vitamins
GGNG	0.0142544	0.0315593	0.0229068	0	0.061127	0.0305635	Glutathione Metabolism	ROS
GGT_L	0	0	0	0	0	0	Starch and Sucrose Metabolism	Glycogen
GGT_U	0	0	0	0	0	0	N-Glycan Biosynthesis	Glycosylation
GGT5r	0	0	0	0	0	0	N-Glycan Biosynthesis	Glycosylation
GGT6	0	0	0	0	0	0	Eicosanoid Metabolism	UFAS
GHMT2r	0.0133832	0.167143	0.0902632	0.0123572	0.292868	0.152613	Eicosanoid Metabolism	UFAS
GHMT2rm	0	0	0	0	0	0	Glycine, Serine, and Threonine Metabolism	Amino Acids
GHMT3	0	0	0	0	0	0	Glycine, Serine, and Threonine Metabolism	Amino Acids
GHMT3m	0	0	0	0	0	0	Lysine Metabolism	Amino Acids
GK1	0	0.16538	0.0826899	0.00242144	0.583128	0.292775	Lysine Metabolism	Amino Acids
GK1m	0	0	0	0	0	0	Nucleotides	Nucleotides
GLACO	0	0	0	0	0	0	Nucleotides	Nucleotides
GLACOm	0	0	0	0	0	0	Ascorbate and Aldarate Metabolism	Vitamins
GLACter	-0.0102067	0	-0.00510336	0	0	0	Ascorbate and Aldarate Metabolism	Vitamins
GLAl	0	0	0	0	0	0	Transport, Endoplasmic Reticular	Transport
GLB1	0	0	0	0	0	0	Sphingolipid Metabolism	Lipids
GLBRAN	0.0142544	0.0315593	0.0229068	0	0.061127	0.0305635	Sphingolipid Metabolism	Lipids
GLCAASE1ly	0	0	0	0	0	0	Starch and Sucrose Metabolism	Glycogen
GLCAASE4ly	0	0	0	0	0	0	Heparan sulfate degradation	Glycosylation
GLCAASE5ly	0	0	0	0	0	0	Chondroitin sulfate degradation	Glycosylation
GLCAASE6ly	0	0	0	0	0	0	Chondroitin sulfate degradation	Glycosylation
GLCAASE7ly	0	0	0	0	0	0	Chondroitin sulfate degradation	Glycosylation
GLCAASE8ly	0	0.0347351	0.0173675	0	0.114957	0.0574786	Chondroitin sulfate degradation	Glycosylation
GLCAASE9ly	0	0.0347351	0.0173675	0	0.114957	0.0574786	Hyaluronan Metabolism	Glycosylation
GLCAE2g	0	0	0	0	0	0	Hyaluronan Metabolism	Glycosylation
GLCAT2g	0	0	0	0	0	0	Chondroitin / heparan sulfate biosynthesis	Glycosylation
GLCAT3g	0	0	0	0	0	0	Chondroitin / heparan sulfate biosynthesis	Glycosylation
GLCAT4g	0	0	0	0	0	0	Chondroitin / heparan sulfate biosynthesis	Glycosylation
GLCAT5g	0	0	0	0	0	0	Chondroitin / heparan sulfate biosynthesis	Glycosylation
GLCAT6g	0	0	0	0	0	0	Chondroitin / heparan sulfate biosynthesis	Glycosylation
GLCAT7g	0	0	0	0	0	0	Chondroitin / heparan sulfate biosynthesis	Glycosylation
GLCAT8g	0	0	0	0	0	0	Chondroitin / heparan sulfate biosynthesis	Glycosylation
GLCAT9g	0	0	0	0	0	0	Chondroitin / heparan sulfate biosynthesis	Glycosylation
GLCATg	0	0	0	0	0	0	Chondroitin / heparan sulfate biosynthesis	Glycosylation
GLCMter	0	0	0	0	0	0	Chondroitin / heparan sulfate biosynthesis	Glycosylation
GLCNACASE1ly	0	0	0	0	0	0	Transport, Extracellular	Transport
GLCNACASE2ly	0	0	0	0	0	0	Heparan sulfate degradation	Glycosylation
GLCNACASE3ly	0	0	0	0	0	0	Heparan sulfate degradation	Glycosylation
GLCNACASE4ly	0	0	0	0	0	0	Heparan sulfate degradation	Glycosylation
GLCNACASE5ly	0	0	0	0	0	0	Heparan sulfate degradation	Glycosylation
GLCNACDASg	0	0	0	0	0	0	Heparan sulfate degradation	Glycosylation
GLCNACPT_L	0	0.0113377	0.00566884	0	0.0400487	0.0200244	Chondroitin / heparan sulfate biosynthesis	Glycosylation
GLCNACPT_U	0	0.0113377	0.00566884	0	0.0400487	0.0200244	N-Glycan Biosynthesis	Glycosylation
GLCNACT_L	0	0.0113377	0.00566884	0	0.0400487	0.0200244	N-Glycan Biosynthesis	Glycosylation
GLCNACT_U	0	0.0113377	0.00566884	0	0.0400487	0.0200244	N-Glycan Biosynthesis	Glycosylation
GLCNACT1g	0	0	0	0	0	0	N-Glycan Biosynthesis	Glycosylation
GLCNACT2g	0	0	0	0	0	0	Chondroitin / heparan sulfate biosynthesis	Glycosylation
GLCNACT3g	0	0	0	0	0	0	Chondroitin / heparan sulfate biosynthesis	Glycosylation
GLCNACT4g	0	0	0	0	0	0	Chondroitin / heparan sulfate biosynthesis	Glycosylation
GLCNACT5g	0	0	0	0	0	0	Chondroitin / heparan sulfate biosynthesis	Glycosylation
GLCt1r	0	0	0	0	0	0	Chondroitin / heparan sulfate biosynthesis	Glycosylation
GLCt2_2	0.2718	0.2718	0.2718	0.2718	0.2718	0.2718	Transport, Extracellular	Transport
GLCt2r	0	0	0	0	0	0	Transport, Extracellular	Transport
GLCt4	0	0	0	0	0	0	Transport, Extracellular	Transport
GLCt4_2	0	0	0	0	0	0	Transport, Extracellular	Transport
GLCter	-0.328792	0	-0.164396	-1.16141	0	-0.580706	Transport, Extracellular	Transport
GLCtg	0	0.109597	0.0547987	0	0.387137	0.193569	Transport, Endoplasmic Reticular	Transport
GLCtly	0	0	0	0	0	0	Transport, Golgi Apparatus	Transport
GLCURter	0	0.126626	0.0633129	0	0.39726	0.19863	Transport, Lysosomal	Transport
GLCURtly	-0.0694701	0	-0.0347351	-0.229915	0	-0.114957	Transport, Endoplasmic Reticular	Transport
GLDBRAN	0	0.0173049	0.00865243	0	0.061127	0.0305635	Transport, Lysosomal	Transport
GLGNS1	0.0142544	0.0315593	0.0229068	0	0.061127	0.0305635	Starch and Sucrose Metabolism	Glycogen
GLNALANaEx	0	0	0	0	0	0	Starch and Sucrose Metabolism	Glycogen
GLNASNNaEx	0	0	0	0	0	0	Transport, Extracellular	Transport
GLNCYSNaEx	0	0	0	0	0	0	Transport, Extracellular	Transport
GLNLASEer	-0.113051	0	-0.0565254	-0.5517	0	-0.27585	Transport, Extracellular	Transport
GLNS	0	0.328792	0.164396	0	1.16141	0.580706	Ascorbate and Aldarate Metabolism	Vitamins
GLNSERNaEx	0	0	0	0	0	0	Glutamate metabolism	Amino Acids
GLNt4	0	0	0	0	0	0	Transport, Extracellular	Transport
GLNTHRNaEx	0	0	0	0	0	0	Transport, Extracellular	Transport
GLNtm	0	0.202208	0.101104	0	0.579179	0.28959	Transport, Extracellular	Transport
GLNtN1	0.0765	0.0865	0.0815	0.0364068	0.0464068	0.0414068	Transport, Mitochondrial	Transport
GLPASE1	0	0.0173049	0.00865243	0	0.061127	0.0305635	Transport, Extracellular	Transport
GLPASE2	0	0.0173049	0.00865243	0	0.061127	0.0305635	Starch and Sucrose Metabolism	Glycogen
GLRASE	-0.188313	0	-0.0941565	-0.584112	0	-0.292056	Starch and Sucrose Metabolism	Glycogen
GLU5Km	0	0.410991	0.205495	0	1.45177	0.725883	Ascorbate and Aldarate Metabolism	Vitamins
GLUCYS	0	0.110179	0.0550894	0	0.38814	0.19407	Urea cycle/amino group metabolism	Amino Acids
GLUDxm	-4.70637	4.4962	-0.105083	-5.08625	4.4962	-0.295027	Glutathione Metabolism	ROS
GLUDym	-4.70637	4.4962	-0.105083	-5.08625	4.4962	-0.295027	Glutamate metabolism	Amino Acids
GluForTx	0	0.00584639	0.0029232	0	0.00585106	0.00292553	Glutamate metabolism	Amino Acids
GLUNm	0	0.202208	0.101104	0	0.579179	0.28959	Histidine Metabolism	Amino Acids
GLUPRT	0.00347723	0.03039	0.0169336	0.00483879	0.0383895	0.0216141	Glutamate metabolism	Amino Acids
GLUt2m	-0.432347	0.304219	-0.064064	-1.20533	1.13422	-0.035555	IMP Biosynthesis	Nucleotides
GLUt6	0	0.328792	0.164396	0	1.16141	0.580706	Transport, Mitochondrial	Transport
GLUt7l	0	0.328792	0.164396	0	1.16141	0.580706	Transport, Extracellular	Transport
GLUTCOADHm	0	0	0	0	0	0	Transport, Lysosomal	Transport
GLUtr	0	0	0	0	0	0	Tryptophan metabolism	Amino Acids
GLUVESSEC	0	0.328792	0.164396	0	1.16141	0.580706	Transport, Endoplasmic Reticular	Transport
GLXO1	0	0	0	0	0	0	Transport, Extracellular	Transport
GLXtm	0	0	0	0	0	0	Glyoxylate and Dicarboxylate Metabolism	Central Metabolism
GLXtp	0	0	0	0	0	0	Transport, Mitochondrial	Transport
GLYAMDTRc	0	0.046052	0.023026	0	0.0575649	0.0287825	Transport, Peroxisomal	Transport
GLYATm	0	0	0	0	0	0	Urea cycle/amino group metabolism	Amino Acids
GLYBt4(2)r	-0.0262582	0	-0.0131291	-0.0908177	0	-0.0454089	Glycine, Serine, and Threonine Metabolism	Amino Acids
GLYBtm	0	0.0262582	0.0131291	0	0.0908177	0.0454089	Transport, Extracellular	Transport
GLYC-St	0	0	0	0	0	0	Transport, Mitochondrial	Transport
GLYC3Ptm	0	0	0	0	0	0	Transport, Extracellular	Transport
GLYCK2	0	0	0	0	0	0	Transport, Mitochondrial	Transport
GLYCLTDy	0	0	0	0	0	0	Glyoxylate and Dicarboxylate Metabolism	Central Metabolism
GLYCLTtp	0	0	0	0	0	0	Glyoxylate and Dicarboxylate Metabolism	Central Metabolism
GLYCt	0	0.239086	0.119543	0	0.680058	0.340029	Transport, Peroxisomal	Transport
GLYCtm	0	0	0	0	0	0	Transport, Extracellular	Transport
GLYK	0	0	0	0	0	0	Transport, Mitochondrial	Transport
GLYKm	0	0	0	0	0	0	Glycerophospholipid Metabolism	Lipids
GLYOX	0	0.144324	0.0721619	0	0.534566	0.267283	Glycerophospholipid Metabolism	Lipids
GLYOXm	0	0	0	0	0	0	Pyruvate Metabolism	Central Metabolism
GLYt2r	-0.0881977	0.89654	0.404171	-0.017106	3.42034	1.70162	Pyruvate Metabolism	Central Metabolism
GLYt2rL	0	0	0	0	0	0	Transport, Extracellular	Transport
GLYt4	0	0	0	0	0	0	Transport, Lysosomal	Transport
GLYt7(211)r	0.0665876	0.0665876	0.0665876	0.017106	0.0638973	0.0405016	Transport, Extracellular	Transport
GLYt7(311)r	0	0	0	0	0	0	Transport, Extracellular	Transport
GLYtm	0	0.129594	0.0647969	0	0.23476	0.11738	Transport, Extracellular	Transport
GLYtp	0	0	0	0	0	0	Transport, Mitochondrial	Transport
GLYVESSEC	0	0.328792	0.164396	0	1.16141	0.580706	Transport, Peroxisomal	Transport
GMAND	0	0	0	0	0	0	Transport, Extracellular	Transport
GMPR	0	0.126666	0.0633332	0	0.403432	0.201716	Fructose and Mannose Metabolism	Glycosylation
GMPS2	0.00158324	0.12825	0.0649165	0.00242144	0.405854	0.204138	Nucleotides	Nucleotides
GMPtg	0	0	0	0	0	0	Nucleotides	Nucleotides
GMPtn	-0.136997	0	-0.0684984	-0.483922	0	-0.241961	Transport, Golgi Apparatus	Transport
GND	0	0.36514	0.18257	0	0.650427	0.325214	Transport, Nuclear	Transport
GNDer	0	0	0	0	0	0	Pentose Phosphate Pathway	Central Metabolism
GNMT	0	0	0	0	0	0	Pentose Phosphate Pathway	Central Metabolism
GP1CALPHAte	0	0	0	0	0	0	Glycine, Serine, and Threonine Metabolism	Amino Acids
GP1CALPHAtg	0	0	0	0	0	0	Transport, Extracellular	Transport
GP1Cte	0	0	0	0	0	0	Transport, Golgi Apparatus	Transport
GP1Ctg	0	0	0	0	0	0	Transport, Extracellular	Transport
GPAM_hs	0.00227379	0.0131221	0.00769793	0	0.286385	0.143192	Transport, Golgi Apparatus	Transport
GPAMm_hs	0	0	0	0	0	0	Triacylglycerol Synthesis	Lipids
GPDDA1	0	0.164396	0.0821981	0	0.580706	0.290353	Triacylglycerol Synthesis	Lipids
GPIAT	0	0	0	0	0	0	Glycerophospholipid Metabolism	Lipids
GPIMTer_L	0	0	0	0	0	0	Glycosylphosphatidylinositol (GPI)-anchor biosynthesis	Glycosylation
GPIMTer_U	0	0	0	0	0	0	Glycosylphosphatidylinositol (GPI)-anchor biosynthesis	Glycosylation
GQ1BALPHAte	0	0	0	0	0	0	Glycosylphosphatidylinositol (GPI)-anchor biosynthesis	Glycosylation
GQ1BALPHAtg	0	0	0	0	0	0	Transport, Extracellular	Transport
GQ1Bte	0	0	0	0	0	0	Transport, Golgi Apparatus	Transport
GQ1Btg	0	0	0	0	0	0	Transport, Extracellular	Transport
GRTT	0	0	0	0	0	0	Transport, Golgi Apparatus	Transport
GRTTx	0.00113008	0.0121053	0.00661769	0	0.0381393	0.0190697	Cholesterol Metabolism	Steriods
GSNKm	0	0	0	0	0	0	Cholesterol Metabolism	Steriods
GSNt	0	0	0	0	0	0	Nucleotides	Nucleotides
GSNt4	0	0	0	0	0	0	Transport, Extracellular	Transport
GSNt5	0	0	0	0	0	0	Transport, Extracellular	Transport
GSNtl	0	0	0	0	0	0	Transport, Extracellular	Transport
GSNtm	0	0	0	0	0	0	Transport, Lysosomal	Transport
GT1Ate	0	0	0	0	0	0	Transport, Mitochondrial	Transport
GT1Atg	0	0	0	0	0	0	Transport, Extracellular	Transport
GTHDH	0	0.410991	0.205495	0	0.603508	0.301754	Transport, Golgi Apparatus	Transport
GTHO	0	0.159093	0.0795466	0	0.452631	0.226315	Ascorbate and Aldarate Metabolism	Vitamins
GTHOm	0	0.145056	0.0725278	0	0.452631	0.226315	Glutamate metabolism	Amino Acids
GTHP	-0.410991	0.149451	-0.13077	-0.603508	0.301754	-0.150877	Glutamate metabolism	Amino Acids
GTHPe	0	0	0	0	0	0	Glutathione Metabolism	ROS
GTHPm	0	0.145056	0.0725278	0	0.452631	0.226315	Glutathione Metabolism	ROS
GTHRDt	0	0	0	0	0	0	Glutathione Metabolism	ROS
GTHRDtr	0	0	0	0	0	0	Glutathione Metabolism	ROS
GTHS	0	0.110179	0.0550894	0	0.38814	0.19407	Transport, Endoplasmic Reticular	Transport
GTMLTe	0	0.110179	0.0550894	0	0.38814	0.19407	Glutathione Metabolism	ROS
GTPCI	0	0	0	0	0	0	Glutathione Metabolism	ROS
GTPCIn	0	0	0	0	0	0	Tetrahydrobiopterin	Vitamins
GTPtn	0	0	0	0	0	0	Tetrahydrobiopterin	Vitamins
GUACYC	0	0.164396	0.0821981	0	0.580706	0.290353	Transport, Nuclear	Transport
GUAD	0	0	0	0	0	0	Nucleotides	Nucleotides
GUAPRT	0	0.164977	0.0824883	0	0.580706	0.290353	Purine Catabolism	Nucleotides
GUAt	-0.0215302	0	-0.0107651	-0.0268406	0	-0.0134203	Salvage Pathway	Nucleotides
GULLACter	0	0.034246	0.017123	0	0	0	Transport, Extracellular	Transport
GULN3D	0	0.126626	0.0633129	0	0.39726	0.19863	Transport, Endoplasmic Reticular	Transport
GULNDer	-0.00920285	0.126626	0.0587115	0	0.39726	0.19863	Pentose and Glucuronate Interconversions	Central Metabolism
GULNter	0	0.126626	0.0633129	0	0.39726	0.19863	Pentose and Glucuronate Interconversions	Central Metabolism
GUR1PP	0	0.0935002	0.0467501	0	0.301169	0.150585	Transport, Endoplasmic Reticular	Transport
H2CO3D	-9.99663	0.701529	-4.64755	-9.99516	1.53176	-4.2317	Pentose and Glucuronate Interconversions	Central Metabolism
H2CO3D2	-0.701529	9.99663	4.64755	-1.53176	9.99516	4.2317	Miscellaneous	Misc
H2CO3D2m	0	0	0	0	0	0	Miscellaneous	Misc
H2ETer	0	0	0	0	0	0	Miscellaneous	Misc
H2MTer_L	0	0	0	0	0	0	Glycosylphosphatidylinositol (GPI)-anchor biosynthesis	Glycosylation
H2MTer_U	0	0	0	0	0	0	Glycosylphosphatidylinositol (GPI)-anchor biosynthesis	Glycosylation
H2O2t	-0.153457	0.410991	0.128767	-0.452631	0.603508	0.0754385	Glycosylphosphatidylinositol (GPI)-anchor biosynthesis	Glycosylation
H2O2tly	0	0.159093	0.0795466	0	0.452631	0.226315	Transport, Extracellular	Transport
H2O2tm	-0.594531	1.23297	0.319221	-0.603508	1.81052	0.603508	Transport, Lysosomal	Transport
H2O2tn	-0.117426	0	-0.0587129	-0.41479	0	-0.207395	Transport, Mitochondrial	Transport
H2O2tp	-0.410991	1.23297	0.410991	-0.603508	1.81052	0.603508	Transport, Nuclear	Transport
H2Ot	-10.5747	-10.4093	-10.492	-10.3859	-10.4248	-10.4053	Transport, Peroxisomal	Transport
H2Oter	-0.188747	0.508089	0.159671	-0.598669	1.19337	0.297349	Transport, Extracellular	Transport
H2Otg	0	0.164396	0.0821981	0	0.580706	0.290353	Transport, Endoplasmic Reticular	Transport
H2Otly	-0.318186	0.328792	0.0053031	-0.905262	1.16141	0.128075	Transport, Golgi Apparatus	Transport
H2Otm	-1.28609	-1.10763	-1.19686	0.131879	-0.355732	-0.111927	Transport, Lysosomal	Transport
H2Otn	-0.514174	0	-0.257087	-1.19337	0	-0.596683	Transport, Mitochondrial	Transport
H2Otp	-1.23297	0.166721	-0.533125	-1.81052	0.584716	-0.612904	Transport, Nuclear	Transport
H3ETer	0	0	0	0	0	0	Transport, Peroxisomal	Transport
H3MTer_L	0	0	0	0	0	0	Glycosylphosphatidylinositol (GPI)-anchor biosynthesis	Glycosylation
H3MTer_U	0	0	0	0	0	0	Glycosylphosphatidylinositol (GPI)-anchor biosynthesis	Glycosylation
H4ETer	0	0	0	0	0	0	Glycosylphosphatidylinositol (GPI)-anchor biosynthesis	Glycosylation
H5MTer_L	0	0	0	0	0	0	Glycosylphosphatidylinositol (GPI)-anchor biosynthesis	Glycosylation
H5MTer_U	0	0	0	0	0	0	Glycosylphosphatidylinositol (GPI)-anchor biosynthesis	Glycosylation
H6ET2er	0	0	0	0	0	0	Glycosylphosphatidylinositol (GPI)-anchor biosynthesis	Glycosylation
H6ETer	0	0	0	0	0	0	Glycosylphosphatidylinositol (GPI)-anchor biosynthesis	Glycosylation
H6MTer_L	0	0	0	0	0	0	Glycosylphosphatidylinositol (GPI)-anchor biosynthesis	Glycosylation
H6MTer_U	0	0	0	0	0	0	Glycosylphosphatidylinositol (GPI)-anchor biosynthesis	Glycosylation
H7ET2er	0	0	0	0	0	0	Glycosylphosphatidylinositol (GPI)-anchor biosynthesis	Glycosylation
H7ETer	0	0	0	0	0	0	Glycosylphosphatidylinositol (GPI)-anchor biosynthesis	Glycosylation
H7MTer_L	0	0	0	0	0	0	Glycosylphosphatidylinositol (GPI)-anchor biosynthesis	Glycosylation
[truncated: 1,395 more rows]

## Sheet: DENV
Reaction ID	Flux Variability Analysis Host-Optimised Fluxes (mmol/gDW/h-1)			Flux Varability Analysis Virus-Optimised Fluxes (mmol/gDW/h-1)			Model Subsystem ID	Aggregate Subsystem[1]
	Minimum Flux (F-)	Maximum Flux (F+)	Median Flux Value (F+ - ((F+ - F-) / 2)	Minimum Flux (F-)	Maximum Flux (F+)	Median Flux Value (F+ - ((F+ - F-) / 2)
10FTHF5GLUtl	0	0.0821981	0.0410991	0	0.292573	0.146286	Transport, Lysosomal	Transport
10FTHF5GLUtm	0	0.0821981	0.0410991	0	0.292573	0.146286	Transport, Mitochondrial	Transport
10FTHF6GLUtl	0	0.0657585	0.0328792	0	0.234058	0.117029	Transport, Lysosomal	Transport
10FTHF6GLUtm	0	0.0657585	0.0328792	0	0.234058	0.117029	Transport, Mitochondrial	Transport
10FTHF7GLUtl	0	0.0547987	0.0273994	0	0.195048	0.0975242	Transport, Lysosomal	Transport
10FTHF7GLUtm	0	0.0547987	0.0273994	0	0.195048	0.0975242	Transport, Mitochondrial	Transport
10FTHFtl	-0.0821981	0	-0.0410991	-0.292573	0	-0.146286	Transport, Lysosomal	Transport
10FTHFtm	-0.12986	0.0821981	-0.0238308	-0.233703	0.292573	0.0294349	Transport, Mitochondrial	Transport
13DAMPPOX	0	0	0	0	0	0	beta-Alanine metabolism	Amino Acids
1a,24,25VITD2Hm	0	0	0	0	0	0	Vitamin D	Vitamins
1a,24,25VITD3Hm	0	0	0	0	0	0	Vitamin D	Vitamins
1a,25VITD2Hm	0	0	0	0	0	0	Vitamin D	Vitamins
1a,25VITD3Hm	0	0	0	0	0	0	Vitamin D	Vitamins
1MNCAMti	0	0	0	0	0	0	Transport, Extracellular	Transport
24,25DHVITD2t	0	0	0	0	0	0	Transport, Extracellular	Transport
24,25DHVITD2tm	0	0	0	0	0	0	Transport, Mitochondrial	Transport
24,25DHVITD3t	0	0.00486126	0.00243063	0	0.0170581	0.00852904	Transport, Extracellular	Transport
24,25DHVITD3tm	0	0.00486126	0.00243063	0	0.0170581	0.00852904	Transport, Mitochondrial	Transport
24,25VITD2Hm	0	0	0	0	0	0	Vitamin D	Vitamins
24,25VITD3Hm	0	0.00486126	0.00243063	0	0.0170581	0.00852904	Vitamin D	Vitamins
24NPHte	0	0	0	0	0	0	Transport, Extracellular	Transport
25HVITD2t	0	0	0	0	0	0	Transport, Extracellular	Transport
25HVITD2tin	0	0	0	0	0	0	Transport, Extracellular	Transport
25HVITD2tin-m	0	0	0	0	0	0	Transport, Mitochondrial	Transport
25HVITD2tm	0	0	0	0	0	0	Transport, Mitochondrial	Transport
25HVITD3t	0	0	0	0	0	0	Transport, Extracellular	Transport
25HVITD3tin	0	0	0	0	0	0	Transport, Extracellular	Transport
25HVITD3tin-m	0	0	0	0	0	0	Transport, Mitochondrial	Transport
25HVITD3tm	0	0	0	0	0	0	Transport, Mitochondrial	Transport
25VITD2Hm	0	0	0	0	0	0	Vitamin D	Vitamins
25VITD3Hm	0	0	0	0	0	0	Vitamin D	Vitamins
2DR1PP	0	0.0666697	0.0333349	0	0.248131	0.124065	Pyrimidine Catabolism	Nucleotides
2HBO	-0.00838558	0	-0.00419279	-0.00451581	0	-0.0022579	Propanoate Metabolism	FAS
2HBt2	-0.00838558	0	-0.00419279	-0.00451581	0	-0.0022579	Transport, Extracellular	Transport
2HCO3_NAt	0	0	0	0	0	0	Transport, Extracellular	Transport
2MCITt	0	0.00838558	0.00419279	0	0.00451581	0.0022579	Transport, Extracellular	Transport
2OXOADOXm	0	0	0	0	0	0	Lysine Metabolism	Amino Acids
2OXOADPTm	0	0	0	0	0	0	Tryptophan metabolism	Amino Acids
34DHPHAMT	0	0	0	0	0	0	Tyrosine metabolism	Amino Acids
34DHPLACOX	0	0	0	0	0	0	Tyrosine metabolism	Amino Acids
34DHPLACOX(NADP)	0	0	0	0	0	0	Tyrosine metabolism	Amino Acids
34HPLFM	0	0	0	0	0	0	Ubiquinone Biosynthesis	Vitamins
35CGMPtn	0	0.136997	0.0684984	0	0.487621	0.243811	Transport, Nuclear	Transport
3AIBt	0	0.000626959	0.00031348	0	0.00279414	0.00139707	Transport, Extracellular	Transport
3AIBTm	0	0.000626959	0.00031348	0	0.00279414	0.00139707	Valine, Leucine, and Isoleucine Metabolism	Amino Acids
3AIBtm	0	0.000626959	0.00031348	0	0.00279414	0.00139707	Valine, Leucine, and Isoleucine Metabolism	Amino Acids
3DPHBH1	0	0	0	0	0	0	Ubiquinone Biosynthesis	Vitamins
3DPHBH2	0	0	0	0	0	0	Ubiquinone Biosynthesis	Vitamins
3DSPHR	0.00019031	0.0821711	0.0411807	0	0.13075	0.0653749	Sphingolipid Metabolism	Lipids
3HAO	0	0	0	0	0	0	Tryptophan metabolism	Amino Acids
3HBCDm	0	0	0	0	0	0	Butanoate Metabolism	FAS
3HBCOAHLm	0	0.000626959	0.00031348	0	0.00279414	0.00139707	Valine, Leucine, and Isoleucine Metabolism	Amino Acids
3HCO3_NAt	0	0	0	0	0	0	Transport, Extracellular	Transport
3HLYTCL	0	0	0	0	0	0	Tyrosine metabolism	Amino Acids
3HPCOAHYD	0	0	0	0	0	0	beta-Alanine metabolism	Amino Acids
3HXKYNDCL	0	0	0	0	0	0	Tryptophan metabolism	Amino Acids
3HXKYNOXDA	0	0	0	0	0	0	Tryptophan metabolism	Amino Acids
3M4HDXPAC	0	0	0	0	0	0	Tyrosine metabolism	Amino Acids
3MLDAt	0	0.00584639	0.0029232	0	0.00732614	0.00366307	Transport, Extracellular	Transport
3MOBt2im	0	0	0	0	0	0	Transport, Mitochondrial	Transport
3MOPt2im	0	0	0	0	0	0	Transport, Mitochondrial	Transport
3MOX4HOXPGALDOX	0	0	0	0	0	0	Tyrosine metabolism	Amino Acids
3MOX4HOXPGALDOX(NADP)	0	0	0	0	0	0	Tyrosine metabolism	Amino Acids
3MOXTYROX	0	0	0	0	0	0	Tyrosine metabolism	Amino Acids
3NTD7l	0	0	0	0	0	0	Nucleic acid degradation	Nucleotides
3SALAASPm	0	0	0	0	0	0	Transport, Mitochondrial	Transport
3SALATAi	0	0	0	0	0	0	Cysteine Metabolism	Amino Acids
3SALATAim	0	0	0	0	0	0	Cysteine Metabolism	Amino Acids
41R1H2MAE12BOOX	0	0	0	0	0	0	Tyrosine metabolism	Amino Acids
41R2A1H12BOOX	0	0	0	0	0	0	Tyrosine metabolism	Amino Acids
42A12BOOX	0	0	0	0	0	0	Tyrosine metabolism	Amino Acids
4ABUTtm	0	0.088466	0.044233	0	0.218961	0.10948	Transport, Mitochondrial	Transport
4HBZCOAFm	0	0	0	0	0	0	Ubiquinone Biosynthesis	Vitamins
4HBZFm	0	0	0	0	0	0	Ubiquinone Biosynthesis	Vitamins
4HDEBRISOQUINEte	0	0	0	0	0	0	Transport, Extracellular	Transport
4HGLSDm	0	0	0	0	0	0	Arginine and Proline Metabolism	Amino Acids
4HOXPACDOX(NADP)	0	0	0	0	0.00434695	0.00217348	Tyrosine metabolism	Amino Acids
4MOPt2im	0	0	0	0	0	0	Transport, Mitochondrial	Transport
4MPTNLte	0	0	0	0	0	0	Transport, Extracellular	Transport
4MPTNLtm	0	0	0	0	0	0	Transport, Mitochondrial	Transport
4MPTNLtr	0	0	0	0	0	0	Transport, Endoplasmic Reticular	Transport
4NPHSFte	0	0	0	0	0	0	Transport, Extracellular	Transport
4NPHSULT	0	0	0	0	0	0	CYP Metabolism	UFAS
4NPHte	0	0	0	0	0	0	Transport, Extracellular	Transport
4PYRDX	0	0	0	0	0	0	Transport, Extracellular	Transport
5ADTSTSTERONEGLCte	0	0	0	0	0	0	Transport, Extracellular	Transport
5ADTSTSTERONEGLCtr	0	0	0	0	0	0	Transport, Endoplasmic Reticular	Transport
5ADTSTSTERONEte	0	0	0	0	0	0	Transport, Extracellular	Transport
5ADTSTSTERONEtr	0	0	0	0	0	0	Transport, Endoplasmic Reticular	Transport
5DHFtl	0	0.0821981	0.0410991	0	0.292573	0.146286	Transport, Lysosomal	Transport
5FTHFt2	0	0	0	0	0	0	Transport, Extracellular	Transport
5HLTDL	0	0.00811912	0.00405956	0	0.00772244	0.00386122	Tryptophan metabolism	Amino Acids
5HOXINDACTO2OX	0	0	0	0	0	0	Tryptophan metabolism	Amino Acids
5HOXINDACTOX	0	0	0	0	0	0	Tryptophan metabolism	Amino Acids
5HOXINDACTOXm	0	0	0	0	0	0	Tryptophan metabolism	Amino Acids
5HOXINOXDA	0	0	0	0	0	0	Tryptophan metabolism	Amino Acids
5HTRPDOX	0	0	0	0	0	0	Tryptophan metabolism	Amino Acids
5HTRPVESSEC	0	0.00270637	0.00135319	0	0.00257415	0.00128707	Transport, Extracellular	Transport
5HXKYNDCL	0	0	0	0	0	0	Tryptophan metabolism	Amino Acids
5HXKYNOXDA	0	0	0	0	0	0	Tryptophan metabolism	Amino Acids
5MTHFt	0	0	0	0	0	0	Transport, Extracellular	Transport
5MTHFt2	0	0	0	0	0	0	Transport, Extracellular	Transport
5THFtl	0	0.0821981	0.0410991	0	0.292573	0.146286	Transport, Lysosomal	Transport
5THFtm	0	0.0821981	0.0410991	0	0.292573	0.146286	Transport, Mitochondrial	Transport
6DHFtl	0	0.0657585	0.0328792	0	0.234058	0.117029	Transport, Lysosomal	Transport
6DHFtm	0	0.0657585	0.0328792	0	0.234058	0.117029	Transport, Mitochondrial	Transport
6HTSTSTERONEte	0	0	0	0	0	0	Transport, Extracellular	Transport
6THFtl	0	0.0657585	0.0328792	0	0.234058	0.117029	Transport, Lysosomal	Transport
6THFtm	0	0.0657585	0.0328792	0	0.234058	0.117029	Transport, Mitochondrial	Transport
7DHCHSTEROLtr	0	0.0054876	0.0027438	0	0.0191578	0.00957889	Transport, Endoplasmic Reticular	Transport
7DHFtl	0	0.0547987	0.0273994	0	0.195048	0.0975242	Transport, Lysosomal	Transport
7DHFtm	0	0.0547987	0.0273994	0	0.195048	0.0975242	Transport, Mitochondrial	Transport
7THFtl	0	0.0547987	0.0273994	0	0.195048	0.0975242	Transport, Lysosomal	Transport
7THFtm	0	0.0547987	0.0273994	0	0.195048	0.0975242	Transport, Mitochondrial	Transport
A_MANASE	0	0	0	0	0	0	N-Glycan Degradation	Glycosylation
A_MANASEly	0	0.0113377	0.00566884	0	0.0403549	0.0201774	N-Glycan Degradation	Glycosylation
A4GALTc	0	0	0	0	0	0	Sphingolipid Metabolism	Lipids
A4GALTg	0	0	0	0	0	0	Sphingolipid Metabolism	Lipids
AACOAT	-0.286367	0.274347	-0.00601	-0.675426	0.975242	0.149908	Propanoate Metabolism	FAS
ABO1g	0	0	0	0	0	0	Blood Group Biosynthesis	Heme
ABO2g	0	0	0	0	0	0	Blood Group Biosynthesis	Heme
ABO3g	0	0	0	0	0	0	Blood Group Biosynthesis	Heme
ABO4g	0	0	0	0	0	0	Blood Group Biosynthesis	Heme
ABO5g	0	0	0	0	0	0	Blood Group Biosynthesis	Heme
ABO6g	0	0	0	0	0	0	Blood Group Biosynthesis	Heme
ABO7g	0	0	0	0	0	0	Blood Group Biosynthesis	Heme
ABO8g	0	0	0	0	0	0	Blood Group Biosynthesis	Heme
ABO9g	0	0	0	0	0	0	Blood Group Biosynthesis	Heme
ABTArm	0	0.088466	0.044233	0	0.218961	0.10948	Glutamate metabolism	Amino Acids
ABTD	-0.071116	0	-0.035558	-0.263824	0	-0.131912	Pentose and Glucuronate Interconversions	Central Metabolism
ABTti	0	0.071116	0.035558	0	0.263824	0.131912	Transport, Extracellular	Transport
ABUTD	0	0.088466	0.044233	0	0.224266	0.112133	beta-Alanine metabolism	Amino Acids
ABUTt2r	0	0	0	0	0	0	Transport, Extracellular	Transport
ABUTt2rL	0	0	0	0	0	0	Transport, Lysosomal	Transport
ABUTt4(2)r	0	0	0	0	0	0	Transport, Extracellular	Transport
ACACT1	0	0.743713	0.371857	0	0.743713	0.371857	Cholesterol Metabolism	Steriods
ACACT10m	0	0	0	0	0	0	Valine, Leucine, and Isoleucine Metabolism	Amino Acids
ACACT1r	-1.01771	0.286367	-0.36567	-1.71896	0.675426	-0.521764	Tryptophan metabolism	Amino Acids
ACACT1rm	-0.267999	0.414542	0.0732713	-0.655653	1.11351	0.228929	Tryptophan metabolism	Amino Acids
ACACT1x	0	0	0	0	0	0	Cholesterol Metabolism	Steriods
ACACt2	-0.307198	0	-0.153599	-0.441931	0	-0.220965	Transport, Extracellular	Transport
ACACt2m	-0.379869	0.780072	0.200101	-1.0788	1.4864	0.203798	Transport, Mitochondrial	Transport
ACACT4p	0	0	0	0	0	0	Fatty Acid Metabolism	FAS
ACACT5p	0	0	0	0	0	0	Fatty Acid Metabolism	FAS
ACACT6p	0	0	0	0	0	0	Fatty Acid Metabolism	FAS
ACACT7p	0	0	0	0	0	0	Fatty Acid Metabolism	FAS
ACACT8p	0	0	0	0	0	0	Fatty Acid Metabolism	FAS
ACACT9p	0	0	0	0	0	0	Fatty Acid Metabolism	FAS
ACACtx	-0.565724	0	-0.282862	-1.3059	0	-0.652948	Transport, Peroxisomal	Transport
ACALDt	0	0	0	0	0	0	Transport, Extracellular	Transport
ACALDtm	0	0	0	0	0	0	Transport, Mitochondrial	Transport
ACALDtr	0	0	0	0	0	0	Transport, Endoplasmic Reticular	Transport
ACALDtx	0	0	0	0	0	0	Transport, Peroxisomal	Transport
ACCOAC	0	0.328792	0.164396	0	1.17029	0.585145	Fatty Acid Metabolism	FAS
ACCOACm	0	0.410991	0.205495	0	1.46286	0.731432	Fatty Acid Metabolism	FAS
ACCOAgt	0	0	0	0	0	0	Transport, Extracellular	Transport
ACCOAL	0	0	0	0	0	0	Propanoate Metabolism	FAS
ACCOALm	0	0	0	0	0	0	Propanoate Metabolism	FAS
ACCOAtn	0	0	0	0	0	0	Transport, Nuclear	Transport
ACCOAtr	0	0	0	0	0	0	Transport, Endoplasmic Reticular	Transport
ACETONEt2	-0.321398	0	-0.160699	-0.441931	0	-0.220965	Transport, Extracellular	Transport
ACETONEt2m	-0.321398	0	-0.160699	-0.441931	0	-0.220965	Transport, Mitochondrial	Transport
ACGAGBSIDEtg	0	0	0	0	0	0	Transport, Golgi Apparatus	Transport
ACGAGBSIDEtl	0	0	0	0	0	0	Transport, Lysosomal	Transport
ACGALFUCGALACGALFUC12GAL14ACGLCGALGLUSIDEte	0	0	0	0	0	0	Transport, Extracellular	Transport
ACGALFUCGALACGALFUC12GAL14ACGLCGALGLUSIDEtg	0	0	0	0	0	0	Transport, Golgi Apparatus	Transport
ACGALFUCGALACGALFUCGALACGLCGAL14ACGLCGALGLUSIDEte	0	0	0	0	0	0	Transport, Extracellular	Transport
ACGALFUCGALACGALFUCGALACGLCGAL14ACGLCGALGLUSIDEtg	0	0	0	0	0	0	Transport, Golgi Apparatus	Transport
ACGALtly	0	0	0	0	0	0	Transport, Lysosomal	Transport
ACGAM2E	0	0	0	0	0	0	Aminosugar Metabolism	Glycosylation
ACGAM6PSi	0	0.032142	0.016071	0	0.109196	0.0545979	Aminosugar Metabolism	Glycosylation
ACGAMK	0	0.0694701	0.0347351	0	0.229816	0.114908	Aminosugar Metabolism	Glycosylation
ACGAMPM	0	0.0694701	0.0347351	0	0.229816	0.114908	Aminosugar Metabolism	Glycosylation
ACGAMtly	0	0.0694701	0.0347351	0	0.229816	0.114908	Transport, Lysosomal	Transport
ACGPID	0	0	0	0	0	0	Glycosylphosphatidylinositol (GPI)-anchor biosynthesis	Glycosylation
ACHEe	0	0	0	0	0	0	Glycerophospholipid Metabolism	Lipids
ACHVESSEC	0	0	0	0	0	0	Transport, Extracellular	Transport
ACITL	0	0.552244	0.276122	0	1.22299	0.611494	Citric Acid Cycle	Central Metabolism
ACN13ACNGALGBSIDEte	0	0	0	0	0	0	Transport, Extracellular	Transport
ACN13ACNGALGBSIDEtg	0	0	0	0	0	0	Transport, Golgi Apparatus	Transport
ACN23ACNGALGBSIDEte	0	0	0	0	0	0	Transport, Extracellular	Transport
ACN23ACNGALGBSIDEtg	0	0	0	0	0	0	Transport, Golgi Apparatus	Transport
ACNACNGAL14ACGLCGALGLUSIDEte	0	0	0	0	0	0	Transport, Extracellular	Transport
ACNACNGAL14ACGLCGALGLUSIDEtg	0	0	0	0	0	0	Transport, Golgi Apparatus	Transport
ACNACNGALGBSIDEte	0	0	0	0	0	0	Transport, Extracellular	Transport
ACNACNGALGBSIDEtg	0	0	0	0	0	0	Transport, Golgi Apparatus	Transport
ACNAM9PL	0	0.164396	0.0821981	0	0.566112	0.283056	Aminosugar Metabolism	Glycosylation
ACNAM9PL2	0	0.0642839	0.032142	0	0.211766	0.105883	Aminosugar Metabolism	Glycosylation
ACNAMlt	-0.00756134	0	-0.00378067	-0.0269135	0	-0.0134568	Transport, Lysosomal	Transport
ACNAMPH	0	0.164396	0.0821981	0	0.566112	0.283056	Aminosugar Metabolism	Glycosylation
ACNAMtn	0	0.00749242	0.00374621	0	0.0266682	0.0133341	Transport, Nuclear	Transport
ACNGALACGLCGAL14ACGLCGALGLUSIDEte	0	0	0	0	0	0	Transport, Extracellular	Transport
ACNGALACGLCGAL14ACGLCGALGLUSIDEtg	0	0	0	0	0	0	Transport, Golgi Apparatus	Transport
ACNMLr	0	0.164396	0.0821981	0	0.566112	0.283056	Aminosugar Metabolism	Glycosylation
ACOAD10m	0	0	0	0	0	0	Valine, Leucine, and Isoleucine Metabolism	Amino Acids
ACOAD1fm	0	0	0	0	0	0	Butanoate Metabolism	FAS
ACOAD8m	0	0.0205476	0.0102738	0	0.0264568	0.0132284	Valine, Leucine, and Isoleucine Metabolism	Amino Acids
ACOAD9m	0	0.000626959	0.00031348	0	0.00279414	0.00139707	Valine, Leucine, and Isoleucine Metabolism	Amino Acids
ACOAHi	0	0.281751	0.140876	0	0.791294	0.395647	Pyruvate Metabolism	Central Metabolism
ACOAO7p	0	0.205095	0.102547	0	0.601785	0.300893	Fatty Acid Metabolism	FAS
ACOATA	0	0	0	0	0	0	Fatty Acid Metabolism	FAS
ACODA	0	0	0	0	0	0	Urea cycle/amino group metabolism	Amino Acids
ACONT	0	0.821981	0.410991	0	2.86	1.43	Citric Acid Cycle	Central Metabolism
ACONTm	-0.792832	0.183149	-0.304841	-2.86469	0.297398	-1.28364	Citric Acid Cycle	Central Metabolism
ACOX22x	0	0	0	0	0	0	Bile Acid Biosynthesis	Steriods
ACOX2x	0	0	0	0	0	0	Bile Acid Biosynthesis	Steriods
ACP1(FMN)	0	0.328792	0.164396	0	1.17029	0.585145	Riboflavin Metabolism	Vitamins
ACRNtm	0	0.547987	0.273994	0	1.95048	0.975242	Transport, Mitochondrial	Transport
ACS	0	0.234852	0.117426	0	0.835922	0.417961	Glycolysis/Gluconeogenesis	Central Metabolism
ACS2	0	0	0	0	0	0	Propanoate Metabolism	FAS
ACSm	0	0.205495	0.102748	0	0.731432	0.365716	Glycolysis/Gluconeogenesis	Central Metabolism
ACt2m	0	0.205495	0.102748	0	0.731432	0.365716	Transport, Mitochondrial	Transport
ACt2r	-0.518135	0.164396	-0.176869	-0.879674	0.585145	-0.147265	Transport, Extracellular	Transport
ACtg	0	0	0	0	0	0	Transport, Golgi Apparatus	Transport
ACTLMO	0	0.0913312	0.0456656	0	0.300893	0.150446	Pyruvate Metabolism	Central Metabolism
ACTNMO	0	0.0861749	0.0430874	0	0.226304	0.113152	Pyruvate Metabolism	Central Metabolism
ACYP	0	0.328792	0.164396	0	1.17029	0.585145	Glycolysis/Gluconeogenesis	Central Metabolism
ADA	0	0.101372	0.0506862	0	0.307485	0.153742	Purine Catabolism	Nucleotides
ADAe	0	0.101372	0.0506862	0	0.307485	0.153742	Nucleotides	Nucleotides
ADCim	0	0.321398	0.160699	0	0.441931	0.220965	Propanoate Metabolism	FAS
ADEt	-0.0215302	0	-0.0107651	-0.02615	0	-0.013075	Transport, Extracellular	Transport
ADEtl	0	0	0	0	0	0	Transport, Lysosomal	Transport
ADHAPtx	0	0	0	0	0	0	Transport, Peroxisomal	Transport
ADK1	0.0855113	0.0619345	0.0737229	0.137929	0.221897	0.179913	Nucleotides	Nucleotides
ADK1m	0	0	0	0	0	0	Nucleotides	Nucleotides
ADK3	-0.0234242	-0.00189399	-0.0126591	-0.0344175	-0.0198643	-0.0271409	Nucleotides	Nucleotides
ADK3m	0	0	0	0	0	0	Nucleotides	Nucleotides
ADKd	0	0.0197826	0.00989129	0	0.02615	0.013075	Nucleotides	Nucleotides
ADMDC	0	0	0	0	0	0	Arginine and Proline Metabolism	Amino Acids
ADNCYC	0	0.164396	0.0821981	0	0.585145	0.292573	Nucleotides	Nucleotides
ADNK1	0	0.331645	0.165822	0	1.17282	0.586409	Nucleotides	Nucleotides
ADNK1m	0	0.0274619	0.013731	0	0.0653749	0.0326875	Nucleotides	Nucleotides
ADNt	-0.00197491	0	-0.000987453	-0.02615	0	-0.013075	Transport, Extracellular	Transport
ADNt4	0	0	0	0	0	0	Transport, Extracellular	Transport
ADNt5	0	0	0	0	0	0	Transport, Extracellular	Transport
ADNtl	0	0	0	0	0	0	Transport, Lysosomal	Transport
ADNtm	0	0.0274619	0.013731	0	0.0653749	0.0326875	Transport, Mitochondrial	Transport
ADPGLC	0	0	0	0	0	0	Nucleotides	Nucleotides
ADPMAN	0	0	0	0	0	0	Nucleotides	Nucleotides
ADPRDP	0	0.109597	0.0547987	0	0.390097	0.195048	Nucleotides	Nucleotides
ADPRDPm	0	0	0	0	0	0	Nucleotides	Nucleotides
ADPRIBt	0	0	0	0	0	0	Transport, Extracellular	Transport
ADPT	0	0.165822	0.0829112	0	0.586409	0.293205	Salvage Pathway	Nucleotides
ADPtx	-0.108948	-0.0101708	-0.0595592	-0.34484	0	-0.17242	Transport, Peroxisomal	Transport
ADRNCOAtx	0	0	0	0	0	0	Transport, Peroxisomal	Transport
ADRNCPT1	0	0	0	0	0	0	Carnitine shuttle	FAS
ADRNCPT2	0	0	0	0	0	0	Carnitine shuttle	FAS
ADRNCRNt	0	0	0	0	0	0	Carnitine shuttle	FAS
ADRNLPVESSEC	0	0	0	0	0	0	Transport, Extracellular	Transport
ADRNt	0	0	0	0	0	0	Transport, Extracellular	Transport
ADSELK	0	0	0	0	0	0	Selenoamino acid metabolism	Amino Acids
ADSK	0	0.328792	0.164396	0	1.17029	0.585145	Nucleotides	Nucleotides
ADSL1	0.00189399	0.194127	0.0980104	0.00447957	0.590347	0.297413	Nucleotides	Nucleotides
ADSL2	0.00347723	0.03039	0.0169336	0.00826754	0.040955	0.0246113	IMP Biosynthesis	Nucleotides
ADSS	0.00189399	0.194127	0.0980104	0.00447957	0.590347	0.297413	Nucleotides	Nucleotides
AFLATOXINte	0	0	0	0	0	0	Transport, Extracellular	Transport
AG13T10g	0	0	0	0	0	0	Keratan sulfate biosynthesis	Glycosylation
AG13T11g	0	0	0	0	0	0	Keratan sulfate biosynthesis	Glycosylation
AG13T12g	0	0	0	0	0	0	Keratan sulfate biosynthesis	Glycosylation
AG13T13g	0	0	0	0	0	0	Keratan sulfate biosynthesis	Glycosylation
AG13T14g	0	0	0	0	0	0	Keratan sulfate biosynthesis	Glycosylation
AG13T15g	0	0	0	0	0	0	Keratan sulfate biosynthesis	Glycosylation
AG13T16g	0	0	0	0	0	0	Keratan sulfate biosynthesis	Glycosylation
AG13T17g	0	0	0	0	0	0	Keratan sulfate biosynthesis	Glycosylation
AG13T18g	0	0	0	0	0	0	Keratan sulfate biosynthesis	Glycosylation
AG13T1g	0	0.00756134	0.00378067	0	0.0269135	0.0134568	Keratan sulfate biosynthesis	Glycosylation
AG13T2g	0	0.00756134	0.00378067	0	0.0269135	0.0134568	Keratan sulfate biosynthesis	Glycosylation
AG13T3g	0	0.00756134	0.00378067	0	0.0269135	0.0134568	Keratan sulfate biosynthesis	Glycosylation
AG13T4g	0	0	0	0	0	0	Keratan sulfate biosynthesis	Glycosylation
AG13T5g	0	0	0	0	0	0	Keratan sulfate biosynthesis	Glycosylation
AG13T6g	0	0	0	0	0	0	Keratan sulfate biosynthesis	Glycosylation
AG13T7g	0	0	0	0	0	0	Keratan sulfate biosynthesis	Glycosylation
AG13T8g	0	0	0	0	0	0	Keratan sulfate biosynthesis	Glycosylation
AG13T9g	0	0	0	0	0	0	Keratan sulfate biosynthesis	Glycosylation
AGLPC	0	0	0	0	0	0	Glycerophospholipid Metabolism	Lipids
AGLPED	0	0	0	0	0	0	Glycerophospholipid Metabolism	Lipids
AGLPET	0	0	0	0	0	0	Glycerophospholipid Metabolism	Lipids
AGLPH	0	0	0	0	0	0	Glycerophospholipid Metabolism	Lipids
AGLPR	0	0	0	0	0	0	Glycerophospholipid Metabolism	Lipids
AGLPT	0	0	0	0	0	0	Glycerophospholipid Metabolism	Lipids
AGMTm	0	0	0	0	0	0	Arginine and Proline Metabolism	Amino Acids
AGPAT1	0.00196336	0.198548	0.100256	0	0	0	Triacylglycerol Synthesis	Lipids
AGPex	0	0	0	0	0	0	Transport, Peroxisomal	Transport
AGPRim	0	0	0	0	0	0	Urea cycle/amino group metabolism	Amino Acids
AGPSx	0	0	0	0	0	0	Glycerophospholipid Metabolism	Lipids
AHANDROSTANGLCte	0	0	0	0	0	0	Transport, Extracellular	Transport
AHANDROSTANGLCtr	0	0	0	0	0	0	Transport, Endoplasmic Reticular	Transport
AHC	0.0034326	0.0867121	0.0450723	0.00252814	0.291404	0.146966	Methionine Metabolism	Amino Acids
AHCYStn	0	0	0	0	0	0	Transport, Nuclear	Transport
AHCYStr	-0.0867121	0	-0.043356	-0.291404	0	-0.145702	Transport, Endoplasmic Reticular	Transport
AHEXASE2ly	0	0.0113377	0.00566884	0	0.0403549	0.0201774	N-Glycan Degradation	Glycosylation
AHEXASEly	0	0	0	0	0	0	N-Glycan Degradation	Glycosylation
AICART	0.00347723	0.03039	0.0169336	0.00826754	0.040955	0.0246113	IMP Biosynthesis	Nucleotides
AIRCr	0.00347723	0.03039	0.0169336	0.00826754	0.040955	0.0246113	IMP Biosynthesis	Nucleotides
AK2LGCHOLt	0	0.281751	0.140876	0	0.791294	0.395647	Transport, Extracellular	Transport
AKGDm	0	0.201454	0.100727	0	0.269001	0.134501	Citric Acid Cycle	Central Metabolism
AKGMALtm	-0.59204	0.17126	-0.21039	-1.57391	-0.0165795	-0.795243	Transport, Mitochondrial	Transport
AKGt4_3	-0.215523	0	-0.107762	-0.305698	0	-0.152849	Transport, Extracellular	Transport
AKGtp	0	0	0	0	0	0	Transport, Peroxisomal	Transport
AKR1C41	0	0	0	0	0	0	Bile Acid Biosynthesis	Steriods
AKR1C42	0	0	0	0	0	0	Bile Acid Biosynthesis	Steriods
ALAASNNaEx	0	0	0	0	0	0	Transport, Extracellular	Transport
ALACYSNaEx	0	0	0	0	0	0	Transport, Extracellular	Transport
ALADGLNexR	0	0	0	0	0	0	Transport, Extracellular	Transport
ALADGLYexR	-0.0317661	0	-0.015883	0	0	0	Transport, Extracellular	Transport
ALAGLNexR	0	0	0	0	0	0	Transport, Extracellular	Transport
ALAGLNNaEx	0	0	0	0	0	0	Transport, Extracellular	Transport
ALAGLYexR	0	0	0	0	0	0	Transport, Extracellular	Transport
ALAR	0	0.1989	0.0994498	0	0.204327	0.102163	Alanine and Aspartate Metabolism	Amino Acids
ALASERNaEx	0	0	0	0	0	0	Transport, Extracellular	Transport
ALASm	0	0	0	0	0	0	Glycine, Serine, and Threonine Metabolism	Amino Acids
ALAt2r	0	0	0	0	0	0	Transport, Extracellular	Transport
ALAt2rL	0	0	0	0	0	0	Transport, Lysosomal	Transport
ALAt4	0	0	0	0	0	0	Transport, Extracellular	Transport
ALATA_L	-0.209605	-0.0107053	-0.110155	-0.209605	-0.00527833	-0.107442	Glutamate metabolism	Amino Acids
ALATHRNaEx	0	0	0	0	0	0	Transport, Extracellular	Transport
ALAtN1	-0.0969951	0	-0.0484975	0.01	0	0.005	Transport, Extracellular	Transport
ALCD1	-0.159658	0	-0.0798291	-0.45754	0	-0.22877	Miscellaneous	Misc
ALCD21_D	0	0	0	0	0	0	Pyruvate Metabolism	Central Metabolism
ALCD21_L	0	0	0	0	0	0	Pyruvate Metabolism	Central Metabolism
ALCD22_D	0	0	0	0	0	0	Pyruvate Metabolism	Central Metabolism
ALCD22_L	0	0.00278259	0.00139129	0	0	0	Pyruvate Metabolism	Central Metabolism
ALCD2yf	0	0	0	0	0	0	Glycolysis/Gluconeogenesis	Central Metabolism
ALDD20x	0	0	0	0	0	0	Tryptophan metabolism	Amino Acids
ALDD20xm	0	0	0	0	0	0	Tryptophan metabolism	Amino Acids
ALDD21	0	0	0	0	0	0	Fatty Acid Metabolism	FAS
ALDD2x	0	0	0	0	0	0	Glycolysis/Gluconeogenesis	Central Metabolism
ALDD2xm	0	0	0	0	0	0	Glycolysis/Gluconeogenesis	Central Metabolism
ALDD2y	0	0	0	0	0	0	Glycolysis/Gluconeogenesis	Central Metabolism
ALDSTRNte	0	0	0	0	0	0	Transport, Extracellular	Transport
ALKP	0	0	0	0	0	0	Glycerophospholipid Metabolism	Lipids
ALOX12	0	0	0	0	0	0	Eicosanoid Metabolism	UFAS
ALOX12R	0	0	0	0	0	0	Eicosanoid Metabolism	UFAS
ALOX15	0	0	0	0	0	0	Eicosanoid Metabolism	UFAS
ALOX5	0	0	0	0	0	0	Eicosanoid Metabolism	UFAS
ALOX52	0	0	0	0	0	0	Eicosanoid Metabolism	UFAS
ALR	0	0.164396	0.0821981	0	0.566112	0.283056	Glycine, Serine, and Threonine Metabolism	Amino Acids
ALR2	0	0	0	0	0	0	Pyruvate Metabolism	Central Metabolism
ALR3	0	0.0734082	0.0367041	0	0.00270448	0.00135224	Pyruvate Metabolism	Central Metabolism
AM6SAD	0	0	0	0	0	0	Tryptophan metabolism	Amino Acids
AMACR2p	0	0	0	0	0	0	Bile Acid Biosynthesis	Steriods
AMACR2r	0	0	0	0	0	0	Bile Acid Biosynthesis	Steriods
AMACRp	0	0	0	0	0	0	Bile Acid Biosynthesis	Steriods
AMACRr	0	0	0	0	0	0	Bile Acid Biosynthesis	Steriods
AMANK	0	0.164396	0.0821981	0	0.566112	0.283056	Aminosugar Metabolism	Glycosylation
AMCOXO	0	0	0	0	0	0	Tryptophan metabolism	Amino Acids
AMETr	0	0.0867121	0.043356	0	0.291404	0.145702	Transport, Endoplasmic Reticular	Transport
AMETt2m	0	0.0767128	0.0383564	0	0.258497	0.129248	Transport, Mitochondrial	Transport
AMETtn	0	0	0	0	0	0	Transport, Nuclear	Transport
AMPDA	0	0.192233	0.0961164	0	0.585867	0.292934	Nucleotides	Nucleotides
AMPTASECG	0	0.110179	0.0550894	0	0.391253	0.195626	Glutathione Metabolism	ROS
AMPTASECGe	0	0.110179	0.0550894	0	0.391253	0.195626	Glutathione Metabolism	ROS
AMPtp	0	0	0	0	0	0	Transport, Peroxisomal	Transport
AMPtr	0	0	0	0	0	0	Transport, Endoplasmic Reticular	Transport
AMY1e	0	0	0	0	0	0	Starch and Sucrose Metabolism	Glycogen
AMY2e	0	0	0	0	0	0	Starch and Sucrose Metabolism	Glycogen
ANDRSTRNGLCte	0	0	0	0	0	0	Transport, Extracellular	Transport
ANDRSTRNGLCtr	0	0	0	0	0	0	Transport, Endoplasmic Reticular	Transport
ANDRSTRNte	0	0	0	0	0	0	Transport, Extracellular	Transport
ANDRSTRNtr	0	0	0	0	0	0	Transport, Endoplasmic Reticular	Transport
AP4AH1	0	0	0	0	0	0	Nucleotides	Nucleotides
APAT2rm	0	0	0	0	0	0	beta-Alanine metabolism	Amino Acids
APRTO2	0	0	0	0	0	0	Arginine and Proline Metabolism	Amino Acids
AQCOBALt	0	0	0	0	0	0	Transport, Extracellular	Transport
ARAB-Lt	0	0	0	0	0	0	Transport, Extracellular	Transport
ARABR	0	0	0	0	0	0	Pentose and Glucuronate Interconversions	Central Metabolism
ARACHCOAtx	0	0	0	0	0	0	Transport, Peroxisomal	Transport
ARACHCPT1	0	0	0	0	0	0	Carnitine shuttle	FAS
ARACHCPT2	0	0	0	0	0	0	Carnitine shuttle	FAS
ARACHCRNt	0	0	0	0	0	0	Carnitine shuttle	FAS
ARACHDCOAtx	0	0	0	0	0	0	Transport, Peroxisomal	Transport
ARACHDt2	0	0	0	0	0	0	Transport, Extracellular	Transport
ARACHDtr	0	0	0	0	0	0	Transport, Endoplasmic Reticular	Transport
ARACHt	0	0	0	0	0	0	Transport, Extracellular	Transport
ARGDCm	0	0	0	0	0	0	Arginine and Proline Metabolism	Amino Acids
ARGLYSex	0	0.02375	0.011875	0	0.02375	0.011875	Transport, Extracellular	Transport
ARGN	0	0.0687824	0.0343912	0	0.0831781	0.0415891	Urea cycle/amino group metabolism	Amino Acids
ARGNm	0	0.0687824	0.0343912	0	0.0831781	0.0415891	Urea cycle/amino group metabolism	Amino Acids
ARGSL	0	0.0608228	0.0304114	0	0.120193	0.0600964	Alanine and Aspartate Metabolism	Amino Acids
ARGSS	0	0.0608228	0.0304114	0	0.120193	0.0600964	Alanine and Aspartate Metabolism	Amino Acids
ARGt4	0	0.02375	0.011875	0	0.02375	0.011875	Transport, Extracellular	Transport
ARGtiDF	0	0.02375	0.011875	0	0.02375	0.011875	Transport, Extracellular	Transport
ARGtm	0	0.0687824	0.0343912	0	0.0831781	0.0415891	Transport, Mitochondrial	Transport
ARSA	0	0	0	0	0	0	Sphingolipid Metabolism	Lipids
ARTCOAL1	-0.169891	0.000561625	-0.0846646	-0.259357	0	-0.129678	R Group Synthesis	Central Metabolism
ARTCOAL2	-0.170022	0.00224532	-0.0838882	-0.259357	0	-0.129678	R Group Synthesis	Central Metabolism
ARTCOAL3	-0.170022	0	-0.0850109	-0.259357	0	-0.129678	R Group Synthesis	Central Metabolism
ARTFR11	0	0	0	0	0	0	R Group Synthesis	Central Metabolism
ARTFR12	0	0.102547	0.0512737	0	0.300893	0.150446	R Group Synthesis	Central Metabolism
ARTFR13	0	0.0891302	0.0445651	0	0.154115	0.0770576	R Group Synthesis	Central Metabolism
ARTFR202	0	0	0	0	0	0	R Group Synthesis	Central Metabolism
ARTFR203	0	0	0	0	0	0	R Group Synthesis	Central Metabolism
ARTFR204	0	0	0	0	0	0	R Group Synthesis	Central Metabolism
ARTFR205	0	0	0	0	0	0	R Group Synthesis	Central Metabolism
ARTFR206	0	0	0	0	0	0	R Group Synthesis	Central Metabolism
ARTFR207	0	0	0	0	0	0	R Group Synthesis	Central Metabolism
ARTFR208	0	0	0	0	0	0	R Group Synthesis	Central Metabolism
ARTFR209	0	0	0	0	0	0	R Group Synthesis	Central Metabolism
ARTFR210	0	0	0	0	0	0	R Group Synthesis	Central Metabolism
ARTFR211	0	0	0	0	0	0	R Group Synthesis	Central Metabolism
ARTFR212	0	0	0	0	0	0	R Group Synthesis	Central Metabolism
ARTFR213	0	0	0	0	0	0	R Group Synthesis	Central Metabolism
ARTFR31	0	0.0861442	0.0430721	0	0.153307	0.0766537	R Group Synthesis	Central Metabolism
ARTFR32	0	0.0588061	0.029403	0	0.131118	0.0655591	R Group Synthesis	Central Metabolism
ARTFR33	0	0.0488447	0.0244223	0	0.127175	0.0635877	R Group Synthesis	Central Metabolism
ARTFR34	0	0.0410373	0.0205187	0	0.112023	0.0560117	R Group Synthesis	Central Metabolism
ARTFR41	0	0.102547	0.0512737	0	0.300893	0.150446	R Group Synthesis	Central Metabolism
ARTFR42	0	0.0588061	0.029403	0	0.131118	0.0655591	R Group Synthesis	Central Metabolism
ARTFR43	0	0.0488447	0.0244223	0	0.127175	0.0635877	R Group Synthesis	Central Metabolism
ARTFR44	0	0.0410373	0.0205187	0	0.112023	0.0560117	R Group Synthesis	Central Metabolism
ARTFR45	0	0	0	0	0	0	R Group Synthesis	Central Metabolism
ARTFR46	0	0.0488447	0.0244223	0	0.127175	0.0635877	R Group Synthesis	Central Metabolism
ARTFR61	0	0.205095	0.102547	0	0.601785	0.300893	R Group Synthesis	Central Metabolism
ARTPLM1	-0.0837526	0.207486	0.0618669	-0.153307	0.642788	0.24474	R Group Synthesis	Central Metabolism
ARTPLM1m	0	0.0740729	0.0370364	0	0.131984	0.0659921	R Group Synthesis	Central Metabolism
ARTPLM2	-0.172867	-0.00196336	-0.087415	-0.272826	0	-0.136413	R Group Synthesis	Central Metabolism
ARTPLM2m	0	0.0740729	0.0370364	0	0.131984	0.0659921	R Group Synthesis	Central Metabolism
ARTPLM3	-0.170977	-7.40336e-05	-0.0855257	-0.272826	0	-0.136413	R Group Synthesis	Central Metabolism
ARTPLM3m	0	0.0740729	0.0370364	0	0.131984	0.0659921	R Group Synthesis	Central Metabolism
ASAH1	0	0.0320723	0.0160361	0	0.105267	0.0526333	Sphingolipid Metabolism	Lipids
ASCBOX	0	0.410991	0.205495	0	0.610053	0.305026	Ascorbate and Aldarate Metabolism	Vitamins
ASCBt	0	0	0	0	0	0	Transport, Extracellular	Transport
ASCBt4	0	0	0	0	0	0	Transport, Extracellular	Transport
Asn-X-Ser/Thrtr	-0.0113377	0	-0.00566884	-0.0403549	0	-0.0201774	Transport, Endoplasmic Reticular	Transport
ASNALANaEx	0	0	0	0	0	0	Transport, Extracellular	Transport
ASNCYSNaEx	0	0	0	0	0	0	Transport, Extracellular	Transport
ASNGLNNaEx	0	0	0	0	0	0	Transport, Extracellular	Transport
ASNNm	0	0.101104	0.050552	0	0.287199	0.1436	Alanine and Aspartate Metabolism	Amino Acids
ASNS1	0.00581505	0.107151	0.0564829	0.00410794	0.291307	0.147708	Alanine and Aspartate Metabolism	Amino Acids
ASNSERNaEx	0	0	0	0	0	0	Transport, Extracellular	Transport
ASNt4	0	0	0	0	0	0	Transport, Extracellular	Transport
ASNTHRNaEx	0	0	0	0	0	0	Transport, Extracellular	Transport
ASNtm	0	0.101104	0.050552	0	0.287199	0.1436	Transport, Mitochondrial	Transport
ASNtN1	-0.0232501	0	-0.011625	-0.0399965	0	-0.0199983	Transport, Extracellular	Transport
ASPCTr	0.00336987	0.0571578	0.0302639	0.00826754	0.0736425	0.040955	Pyrimidine Biosynthesis	Nucleotides
ASPDt6	0	0	0	0	0	0	Transport, Extracellular	Transport
ASPDxt	0	0	0	0	0	0	Transport, Peroxisomal	Transport
ASPGLUm	-0.50816	1.10789	0.299867	-1.46806	3.2632	0.89757	Transport, Mitochondrial	Transport
ASPt6	0	0	0	0	0	0	Transport, Extracellular	Transport
ASPTA	-0.53035	1.0857	0.277677	-1.49632	3.23493	0.869308	Alanine and Aspartate Metabolism	Amino Acids
ASPTAm	-1.10789	0.50816	-0.299867	-3.2632	1.46806	-0.89757	Alanine and Aspartate Metabolism	Amino Acids
ATP1ter	0	0	0	0	0	0	Transport, Endoplasmic Reticular	Transport
ATP2ter	0	0	0	0	0	0	Transport, Endoplasmic Reticular	Transport
ATPasel	0	0.0173658	0.0086829	0	0.0574541	0.028727	Transport, Lysosomal	Transport
ATPH1e	0	0	0	0	0	0	Nucleotides	Nucleotides
ATPH2e	0	0	0	0	0	0	Nucleotides	Nucleotides
ATPS4m	0.717508	1.19593	0.95672	0	1.43142	0.715708	Oxidative Phosphorylation	Central Metabolism
ATPtm	0	1.25439	0.627197	0	1.21397	0.606984	Transport, Mitochondrial	Transport
ATPtn	0	0.460203	0.230102	0	1.01916	0.509578	Transport, Nuclear	Transport
ATPtx	0.0101708	0.108948	0.0595592	0	0.34484	0.17242	Transport, Peroxisomal	Transport
AVITE1t	0	0	0	0	0	0	Transport, Extracellular	Transport
AVITE2t	0	0	0	0	0	0	Transport, Extracellular	Transport
B_MANNASEly	0	0.0113377	0.00566884	0	0.0403549	0.0201774	N-Glycan Degradation	Glycosylation
B3GALT3g	0	0	0	0	0	0	Sphingolipid Metabolism	Lipids
B3GALT41g	0	0	0	0	0	0	Sphingolipid Metabolism	Lipids
B3GALT42g	0	0	0	0	0	0	Sphingolipid Metabolism	Lipids
B3GALT43g	0	0	0	0	0	0	Sphingolipid Metabolism	Lipids
B3GALT44g	0	0	0	0	0	0	Sphingolipid Metabolism	Lipids
B3GNT11g	0	0	0	0	0	0	Blood Group Biosynthesis	Heme
B3GNT12g	0	0	0	0	0	0	Blood Group Biosynthesis	Heme
B3GNT51g	0	0	0	0	0	0	Blood Group Biosynthesis	Heme
BALAtmr	0	0	0	0	0	0	Transport, Mitochondrial	Transport
BALAVECSEC	0	0	0	0	0	0	Transport, Extracellular	Transport
BAMPPALDOX	0	0	0	0	0	0	beta-Alanine metabolism	Amino Acids
BAMPPALDOXm	0	0	0	0	0	0	beta-Alanine metabolism	Amino Acids
BBHOX	0	0	0	0	0	0	Lysine Metabolism	Amino Acids
BDHm	-0.385144	0	-0.192572	-0.606681	0	-0.303341	Butanoate Metabolism	FAS
BDMT_L	0	0.0113377	0.00566884	0	0.0403549	0.0201774	N-Glycan Biosynthesis	Glycosylation
BDMT_U	0	0.0113377	0.00566884	0	0.0403549	0.0201774	N-Glycan Biosynthesis	Glycosylation
BETALDHx	0	0	0	0	0	0	Glycine, Serine, and Threonine Metabolism	Amino Acids
BETALDHxm	0	0.0262582	0.0131291	0	0.0904235	0.0452118	Glycine, Serine, and Threonine Metabolism	Amino Acids
BHBt	-0.385144	0	-0.192572	-0.606681	0	-0.303341	Transport, Extracellular	Transport
BHBtm	-0.385144	0	-0.192572	-0.606681	0	-0.303341	Transport, Mitochondrial	Transport
BILDGLCURt	0	0.328792	0.164396	0	1.17029	0.585145	Transport, Extracellular	Transport
BILDGLCURte	0	0.328792	0.164396	0	1.17029	0.585145	Transport, Extracellular	Transport
BILDGLCURtr	0	0	0	0	0	0	Transport, Endoplasmic Reticular	Transport
BILGLCURt	0	0.328792	0.164396	0	1.17029	0.585145	Transport, Extracellular	Transport
BILGLCURte	0	0.328792	0.164396	0	1.17029	0.585145	Transport, Extracellular	Transport
BILGLCURtr	0	0	0	0	0	0	Transport, Endoplasmic Reticular	Transport
BILIRED	0	0	0	0	0	0	Heme Degradation	Heme
BILIRUBt2	0	0	0	0	0	0	Transport, Extracellular	Transport
BILIRUBtr	0	0	0	0	0	0	Transport, Endoplasmic Reticular	Transport
BIOCYTtn	0	0	0	0	0	0	Transport, Nuclear	Transport
biomass	0.0269955	0.0269955	0.0269955	0	0	0	Objective	Objective
BMTer_L	0	0	0	0	0	0	Glycosylphosphatidylinositol (GPI)-anchor biosynthesis	Glycosylation
BMTer_U	0	0	0	0	0	0	Glycosylphosphatidylinositol (GPI)-anchor biosynthesis	Glycosylation
BPNT	0	0.109597	0.0547987	0	0.390097	0.195048	Nucleotides	Nucleotides
BPNT2	0	0.328792	0.164396	0	1.17029	0.585145	Nucleotides	Nucleotides
BTND1	0	0	0	0	0	0	Biotin Metabolism	Vitamins
BTND1n	0	0	0	0	0	0	Biotin Metabolism	Vitamins
BTNDe	0	0	0	0	0	0	Biotin Metabolism	Vitamins
BTNDm	0	0	0	0	0	0	Biotin Metabolism	Vitamins
BTNPL	0	0	0	0	0	0	Biotin Metabolism	Vitamins
BTNPLm	0	0	0	0	0	0	Biotin Metabolism	Vitamins
BTNt2	-0.0626373	0	-0.0313187	-0.0962263	0	-0.0481131	Transport, Extracellular	Transport
BTNt2m	0	0	0	0	0	0	Transport, Mitochondrial	Transport
BTNt3i	0	0.328792	0.164396	0	1.17029	0.585145	Transport, Extracellular	Transport
BTNt4i	0	0	0	0	0	0	Transport, Extracellular	Transport
BTNtn	0	0	0	0	0	0	Transport, Nuclear	Transport
BUTt2m	0	0	0	0	0	0	Transport, Mitochondrial	Transport
BUTt2r	0	0	0	0	0	0	Transport, Extracellular	Transport
BVITEt	0	0	0	0	0	0	Transport, Extracellular	Transport
BZt	0	0	0	0	0	0	Transport, Extracellular	Transport
BZtr	0	0	0	0	0	0	Transport, Endoplasmic Reticular	Transport
C14STRr	0.000565042	0.00605264	0.00330884	0	0.0191578	0.00957889	Cholesterol Metabolism	Steriods
C160CPT1	0	0.0399866	0.0199933	0	0.0399866	0.0199933	Carnitine shuttle	FAS
C160CPT2	0	0.0399866	0.0199933	0	0.0399866	0.0199933	Carnitine shuttle	FAS
C160CRNt	0	0.0399866	0.0199933	0	0.0399866	0.0199933	Carnitine shuttle	FAS
C161CPT1	0	0.0399866	0.0199933	0	0.0399866	0.0199933	Carnitine shuttle	FAS
C161CPT12	0	0.0399866	0.0199933	0	0.0399866	0.0199933	Carnitine shuttle	FAS
C161CPT2	0	0.0399866	0.0199933	0	0.0399866	0.0199933	Carnitine shuttle	FAS
C161CPT22	0	0.0399866	0.0199933	0	0.0399866	0.0199933	Carnitine shuttle	FAS
C161CRN2t	0	0.0399866	0.0199933	0	0.0399866	0.0199933	Carnitine shuttle	FAS
C161CRNt	0	0.0399866	0.0199933	0	0.0399866	0.0199933	Carnitine shuttle	FAS
C180CPT1	0	0.0644223	0.0322111	0	0.115486	0.0577431	Carnitine shuttle	FAS
C180CPT2	0	0.0644223	0.0322111	0	0.115486	0.0577431	Carnitine shuttle	FAS
C180CRNt	0	0.0644223	0.0322111	0	0.115486	0.0577431	Carnitine shuttle	FAS
C181CPT1	0	0.0526093	0.0263047	0	0.104788	0.0523938	Carnitine shuttle	FAS
C181CPT2	0	0.0526093	0.0263047	0	0.104788	0.0523938	Carnitine shuttle	FAS
C181CRNt	0	0.0526093	0.0263047	0	0.104788	0.0523938	Carnitine shuttle	FAS
C204CPT1	0	0	0	0	0	0	Carnitine shuttle	FAS
C204CPT2	0	0	0	0	0	0	Carnitine shuttle	FAS
C204CRNt	0	0	0	0	0	0	Carnitine shuttle	FAS
C226COAtx	0	0	0	0	0	0	Transport, Peroxisomal	Transport
C226CPT1	0	0	0	0	0	0	Carnitine shuttle	FAS
C226CPT2	0	0	0	0	0	0	Carnitine shuttle	FAS
C226CRNt	0	0	0	0	0	0	Carnitine shuttle	FAS
C2M26DCOAHLm	0	0	0	0	0	0	Limonene and pinene degradation	Misc
C2M26DCOAHLx	0	0	0	0	0	0	Limonene and pinene degradation	Misc
C3STDH1Pr	0	0.00605264	0.00302632	0	0.0191578	0.00957889	Cholesterol Metabolism	Steriods
C3STDH1r	0	0.00605264	0.00302632	0	0.0191578	0.00957889	Cholesterol Metabolism	Steriods
C3STKR2r	0.000565042	0.00605264	0.00330884	0	0.0191578	0.00957889	Cholesterol Metabolism	Steriods
C4STMO1r	0.000565042	0.00605264	0.00330884	0	0.0191578	0.00957889	Cholesterol Metabolism	Steriods
C4STMO2Pr	0	0.00605264	0.00302632	0	0.0191578	0.00957889	Cholesterol Metabolism	Steriods
C4STMO2r	0	0.00605264	0.00302632	0	0.0191578	0.00957889	Cholesterol Metabolism	Steriods
CAATPS	0	0.328792	0.164396	0	1.17029	0.585145	Transport, Extracellular	Transport
CAMPt	0	0.0214326	0.0107163	0	0.02615	0.013075	Transport, Extracellular	Transport
CAT2p	0	0	0	0	0	0	Glycolysis/Gluconeogenesis	Central Metabolism
CAt7r	0	0	0	0	0	0	Transport, Extracellular	Transport
CATm	0	0.616486	0.308243	0	0.915079	0.45754	ROS Detoxification	ROS
CATp	0	0.616486	0.308243	0	0.915079	0.45754	Miscellaneous	Misc
CBL2OR	0	0	0	0	0	0	Vitamin B12 Metabolism	Vitamins
CBL2tm	0	0	0	0	0	0	Transport, Mitochondrial	Transport
CBLATm	0	0	0	0	0	0	Vitamin B12 Metabolism	Vitamins
CBPPer	0	0	0	0	0	0	Glycolysis/Gluconeogenesis	Central Metabolism
CBPS	0.00336987	0.0571578	0.0302639	0.00826754	0.0736425	0.040955	Pyrimidine Biosynthesis	Nucleotides
CBPSam	0	0.0538255	0.0269128	0	0.0653749	0.0326875	Glutamate metabolism	Amino Acids
CBPter	0	0	0	0	0	0	Transport, Endoplasmic Reticular	Transport
CBR1	0	0	0	0	0	0	Eicosanoid Metabolism	UFAS
CBR2	0	0	0	0	0	0	Eicosanoid Metabolism	UFAS
CCA_D3t	0	0	0	0	0	0	Transport, Extracellular	Transport
CDIPTr	0.000101009	0.109699	0.0548998	0	0.390097	0.195048	Glycerophospholipid Metabolism	Lipids
CDPDAGtm	-0.0192035	0	-0.00960173	-0.0647117	0	-0.0323558	Transport, Mitochondrial	Transport
CDS	0	0.109939	0.0549696	0	0.390097	0.195048	Glycerophospholipid Metabolism	Lipids
CDSm	0	0.0192035	0.00960173	0	0.0647117	0.0323558	Glycerophospholipid Metabolism	Lipids
CEPTC	0	0.166166	0.083083	0	0.585145	0.292573	Glycerophospholipid Metabolism	Lipids
CEPTE	0	0.166101	0.0830503	0	0.585145	0.292573	Glycerophospholipid Metabolism	Lipids
CERK	0	0.0549312	0.0274656	0	0.125192	0.0625962	Sphingolipid Metabolism	Lipids
CERT1gt	-0.164396	0	-0.0821981	-0.585145	0	-0.292573	Transport, Golgi Apparatus	Transport
CERT1rt	0	0.109597	0.0547987	0	0.390097	0.195048	Transport, Endoplasmic Reticular	Transport
CERT2gt	0	0	0	0	0	0	Transport, Golgi Apparatus	Transport
CERT2rt	-0.109597	0	-0.0547987	-0.390097	0	-0.195048	Transport, Endoplasmic Reticular	Transport
CGLYt3(2)	0	0.110179	0.0550894	0	0.391253	0.195626	Transport, Extracellular	Transport
CGMPt	0	0.0206424	0.0103212	0	0.02615	0.013075	Transport, Extracellular	Transport
CHLP	0	0.328792	0.164396	0	1.17029	0.585145	Objective	Objective
CHLPCTD	0	0.166166	0.083083	0	0.585145	0.292573	Glycerophospholipid Metabolism	Lipids
CHLtm	-0.0192035	0.0262582	0.00352739	-0.0647117	0.0904235	0.0128559	Glycerophospholipid Metabolism	Lipids
CHOLATEt	0	0	0	0	0	0	Transport, Mitochondrial	Transport
CHOLATEt2	0	0	0	0	0	0	Transport, Extracellular	Transport
CHOLD2m	0	0.0262582	0.0131291	0	0.0904235	0.0452118	Transport, Extracellular	Transport
CHOLK	0	0.330431	0.165216	0	1.17029	0.585145	Glycine, Serine, and Threonine Metabolism	Amino Acids
CHOLPtg	-0.164396	0	-0.0821981	-0.585145	0	-0.292573	Glycerophospholipid Metabolism	Lipids
CHOLPtl	-0.0320723	0	-0.0160361	-0.105267	0	-0.0526333	Transport, Golgi Apparatus	Transport
CHOLt4	0	0	0	0	0	0	Transport, Lysosomal	Transport
CHOLtg	0	0.164396	0.0821981	0	0.585145	0.292573	Transport, Extracellular	Transport
CHOLtn	0	0	0	0	0	0	Transport, Golgi Apparatus	Transport
CHOLtr	0	0.164396	0.0821981	0	0.585145	0.292573	Transport, Nuclear	Transport
CHOLtu	-0.000102798	-0.000102798	-0.000102798	-0.000842714	-0.000842714	-0.000842714	Transport, Endoplasmic Reticular	Transport
CHSTEROLSULT	0	0.109597	0.0547987	0	0.390097	0.195048	Transport, Extracellular	Transport
CHSTEROLt	0	0.00540449	0.00270225	0	0.0188973	0.00944863	Steroid Metabolism	Steriods
CHSTEROLt1	0	0	0	0	0	0	Transport, Extracellular	Transport
CHSTEROLt2	0.000565042	0.00596953	0.00326729	0	0.0188973	0.00944863	Transport, Mitochondrial	Transport
CHSTEROLt3	-0.00596953	-0.000565042	-0.00326729	-0.0188973	0	-0.00944863	Transport, Mitochondrial	Transport
CHSTEROLtg	0	0	0	0	0	0	Transport, Mitochondrial	Transport
CHTNASE	0	0	0	0	0	0	Transport, Golgi Apparatus	Transport
CHTNASEe	0	0	0	0	0	0	Aminosugar Metabolism	Glycosylation
CITL	0	0.521073	0.260536	0	1.15521	0.577605	Aminosugar Metabolism	Glycosylation
CITRtm	0	0	0	0	0	0	Citric Acid Cycle	Central Metabolism
CITt4_2	0	0	0	0	0	0	Transport, Mitochondrial	Transport
CITt4_4	0	0	0	0	0	0	Transport, Extracellular	Transport
CITtam	-0.821981	0	-0.410991	-2.91769	0	-1.45885	Transport, Extracellular	Transport
CITtbm	0	0.284384	0.142192	0	0.305698	0.152849	Transport, Mitochondrial	Transport
CK	0	1.09332	0.54666	0	0.677693	0.338846	Transport, Mitochondrial	Transport
CKc	-1.05655	0	-0.528276	-0.127891	0	-0.0639454	Urea cycle/amino group metabolism	Amino Acids
CLFORtex	0	0.00301879	0.0015094	0	0.00954248	0.00477124	Urea cycle/amino group metabolism	Amino Acids
CLFORtex2	0	0.00603759	0.00301879	0	0.019085	0.00954248	Transport, Extracellular	Transport
CLHCO3tex2	0	0	0	0	0	0	Transport, Extracellular	Transport
CLHCOtex	0	0	0	0	0	0	Transport, Extracellular	Transport
CLI2tex	0	0	0	0	0	0	Transport, Extracellular	Transport
CLOHtex2	0	0	0	0	0	0	Transport, Extracellular	Transport
CLOXAtex2	0	0	0	0	0	0	Transport, Extracellular	Transport
CLPNDCOAtx	0	0	0	0	0	0	Transport, Extracellular	Transport
CLPNDCPT1	0	0	0	0	0	0	Transport, Peroxisomal	Transport
CLPNDCPT2	0	0	0	0	0	0	Carnitine shuttle	FAS
CLPNDCRNt	0	0	0	0	0	0	Carnitine shuttle	FAS
CLPNDt	0	0	0	0	0	0	Carnitine shuttle	FAS
CLS_hs	0	0	0	0	0	0	Transport, Extracellular	Transport
CMPACNAtg	0	0.00756134	0.00378067	0	0.0269135	0.0134568	Glycerophospholipid Metabolism	Lipids
CMPACNAtn	0	0.00749242	0.00374621	0	0.0266682	0.0133341	Transport, Golgi Apparatus	Transport
CMPSAS	0	0.00756134	0.00378067	0	0.0269135	0.0134568	Transport, Nuclear	Transport
CMPSASn	0	0.00749242	0.00374621	0	0.0266682	0.0133341	Aminosugar Metabolism	Glycosylation
CO2t	-10.5076	0	-5.25382	-10.7324	0	-5.36618	Aminosugar Metabolism	Glycosylation
CO2ter	-0.0121053	-0.00113008	-0.00661769	-0.0383156	0	-0.0191578	Transport, Extracellular	Transport
CO2tg	0	0	0	0	0	0	Transport, Endoplasmic Reticular	Transport
CO2tm	-0.465482	0.524952	0.0297349	-0.664234	2.61914	0.977455	Transport, Golgi Apparatus	Transport
CO2tn	0	0	0	0	0	0	Transport, Mitochondrial	Transport
CO2tp	-0.0363159	-0.00339025	-0.0198531	-0.114947	0	-0.0574734	Transport, Nuclear	Transport
COAtg	0	0	0	0	0	0	Transport, Peroxisomal	Transport
COAtl	0	0	0	0	0	0	Transport, Golgi Apparatus	Transport
COAtm	-0.134631	0.556497	0.210933	-0.487621	1.22497	0.368675	Transport, Lysosomal	Transport
COAtn	0	0	0	0	0	0	Transport, Mitochondrial	Transport
COAtp	-0.569114	-0.00339025	-0.286252	-1.3059	0	-0.652948	Transport, Nuclear	Transport
COAtr	0	0	0	0	0	0	Transport, Peroxisomal	Transport
COKECBESr	0	0	0	0	0	0	Transport, Endoplasmic Reticular	Transport
COQ3m	0	0	0	0	0	0	Alkaloid biosynthesis II	Vitamins
COQ5m	0	0	0	0	0	0	Ubiquinone Biosynthesis	Vitamins
COQ6m	0	0	0	0	0	0	Ubiquinone Biosynthesis	Vitamins
COQ7m	0	0	0	0	0	0	Ubiquinone Biosynthesis	Vitamins
CORE2GTg	0	0.00756134	0.00378067	0	0.0269135	0.0134568	Ubiquinone Biosynthesis	Vitamins
CORE6GTg	0	0	0	0	0	0	O-Glycan Biosynthesis	Glycosylation
COt	0	0	0	0	0	0	O-Glycan Biosynthesis	Glycosylation
COUCOAFm	0	0	0	0	0	0	Transport, Extracellular	Transport
COUMARINte	0	0	0	0	0	0	Ubiquinone Biosynthesis	Vitamins
CPCTDTX	0	0	0	0	0	0	Transport, Extracellular	Transport
CPPPGO	0	0	0	0	0	0	Glycerophospholipid Metabolism	Lipids
CREATt4(2)r	-0.046052	0	-0.023026	-0.0559538	0	-0.0279769	Heme Biosynthesis	Heme
CREATtmdiffir	0	1.24939	0.624696	0	2.06398	1.03199	Transport, Extracellular	Transport
CRMPte	0	0.0549312	0.0274656	0	0.125192	0.0625962	Urea cycle/amino group metabolism	Amino Acids
CRNCAR3tp	0	0	0	0	0	0	Transport, Extracellular	Transport
CRNCARtp	0	0.565724	0.282862	0	1.3059	0.652948	Transport, Peroxisomal	Transport
CRNt	0	0	0	0	0	0	Transport, Peroxisomal	Transport
CRNtHa	0	0	0	0	0	0	Transport, Extracellular	Transport
CRNtim	0	0.547987	0.273994	0	1.95048	0.975242	Transport, Extracellular	Transport
CRNtuIR	0	0	0	0	0	0	Transport, Mitochondrial	Transport
CRNtuNa	0	0	0	0	0	0	Transport, Extracellular	Transport
CRNtx	0	0	0	0	0	0	Transport, Extracellular	Transport
CRTSLt	0	0	0	0	0	0	Transport, Peroxisomal	Transport
CRTSLtm	0	0	0	0	0	0	Transport, Extracellular	Transport
CRTSLtr	0	0	0	0	0	0	Transport, Mitochondrial	Transport
CRTSTRNt	0	0	0	0	0	0	Transport, Endoplasmic Reticular	Transport
CRTSTRNtm	0	0	0	0	0	0	Transport, Extracellular	Transport
CRTSTRNtr	0	0	0	0	0	0	Transport, Mitochondrial	Transport
CRVNCtr	0	0	0	0	0	0	Transport, Endoplasmic Reticular	Transport
CSm	0	0.682269	0.341135	0	1.46513	0.732565	Transport, Extracellular	Transport
CSNAT	0	0	0	0	0	0	Citric Acid Cycle	Central Metabolism
CSNAT2m	0	0	0	0	0	0	Carnitine shuttle	FAS
CSNAT2x	0	0	0	0	0	0	Carnitine shuttle	FAS
CSNAT3x	0	0	0	0	0	0	Fatty Acid Metabolism	FAS
CSNATer	0	0	0	0	0	0	Carnitine shuttle	FAS
CSNATm	0	0.547987	0.273994	0	1.95048	0.975242	Fatty Acid Metabolism	FAS
CSNATp	0	0.565724	0.282862	0	1.3059	0.652948	Fatty Acid Metabolism	FAS
CSNATr	-0.0163793	0.547987	0.265804	-0.0176459	1.95048	0.966419	Fatty Acid Metabolism	FAS
CSNt	0	0	0	0	0	0	Carnitine shuttle	FAS
CSPG_At	0	0	0	0	0	0	Transport, Extracellular	Transport
CSPG_Atly	0	0	0	0	0	0	Transport, Extracellular	Transport
CSPG_Bt	0	0	0	0	0	0	Transport, Lysosomal	Transport
CSPG_Btly	0	0	0	0	0	0	Transport, Extracellular	Transport
CSPG_Ct	0	0	0	0	0	0	Transport, Lysosomal	Transport
CSPG_Ctly	0	0	0	0	0	0	Transport, Extracellular	Transport
CSPG_Dt	0	0	0	0	0	0	Transport, Lysosomal	Transport
CSPG_Dtly	0	0	0	0	0	0	Transport, Extracellular	Transport
CSPG_Et	0	0	0	0	0	0	Transport, Lysosomal	Transport
CSPG_Etly	0	0	0	0	0	0	Transport, Extracellular	Transport
CTPS1	0	0.167104	0.083552	0	0.588933	0.294467	Transport, Lysosomal	Transport
CTPS2	0	0.128472	0.0642358	0	0.405954	0.202977	Nucleotides	Nucleotides
CTPtn	0	0.00749242	0.00374621	0	0.0266682	0.0133341	Pyrimidine Biosynthesis	Nucleotides
CYANSTm	0	0	0	0	0	0	Transport, Nuclear	Transport
CYANt	0	0	0	0	0	0	Cysteine Metabolism	Amino Acids
CYANtm	0	0	0	0	0	0	Transport, Extracellular	Transport
CYOOm2	0	0.297265	0.148633	0	0.305026	0.152513	Transport, Mitochondrial	Transport
CYOOm3	0	0	0	0	0	0	Oxidative Phosphorylation	Central Metabolism
CYOR-u10m	0.265738	0.594531	0.430134	0.00826754	0.610053	0.30916	Oxidative Phosphorylation	Central Metabolism
CYSALANaEx	0	0	0	0	0	0	Oxidative Phosphorylation	Central Metabolism
CYSAMO	0	0.00315047	0.00157524	0	0.00198766	0.000993832	Transport, Extracellular	Transport
CYSASNNaEx	0	0	0	0	0	0	Taurine and hypotaurine metabolism	Amino Acids
CYSGLNNaEx	0	0	0	0	0	0	Transport, Extracellular	Transport
CYSGLUexR	0	0	0	0	0	0	Transport, Extracellular	Transport
CYSGLYex	0	0	0	0	0	0	Transport, Extracellular	Transport
CYSGLYexR	0	0	0	0	0	0	Transport, Extracellular	Transport
CYSSERNaEx	0	0	0	0	0	0	Transport, Extracellular	Transport
CYSt4	0	0	0	0	0	0	Transport, Extracellular	Transport
CYSTA	0	0.00157524	0.000787618	0	0.000993832	0.000496916	Transport, Extracellular	Transport
CYSTAm	0	0	0	0	0	0	Cysteine Metabolism	Amino Acids
CYStec	0	0	0	0	0	0	Cysteine Metabolism	Amino Acids
CYSTGL	0.0034326	0.00658307	0.00500784	0.00252814	0.00451581	0.00352197	Transport, Extracellular	Transport
CYSTGLUex	0	0	0	0	0	0	Cysteine Metabolism	Amino Acids
CYSTHRNaEx	0	0	0	0	0	0	Transport, Extracellular	Transport
CYSTS	0.0034326	0.00658307	0.00500784	0.00252814	0.00451581	0.00352197	Transport, Extracellular	Transport
CYSTSERex	0	0	0	0	0	0	Methionine Metabolism	Amino Acids
CYTD	0	0.164396	0.0821981	0	0.585145	0.292573	Transport, Extracellular	Transport
CYTDK1	0	0.328792	0.164396	0	1.17029	0.585145	Pyrimidine Catabolism	Nucleotides
CYTDK2m	0	0.0192035	0.00960173	0	0.0647117	0.0323558	Nucleotides	Nucleotides
CYTDn	0	0.109597	0.0547987	0	0.390097	0.195048	Nucleotides	Nucleotides
CYTDt	-0.0232501	0	-0.011625	-0.00308712	0	-0.00154356	Nucleotides	Nucleotides
CYTDt4	0	0	0	0	0	0	Transport, Extracellular	Transport
CYTDt5	0	0	0	0	0	0	Transport, Extracellular	Transport
CYTDtl	0	0	0	0	0	0	Transport, Extracellular	Transport
CYTDtm	0	0.0192035	0.00960173	0	0.0647117	0.0323558	Nucleotides	Nucleotides
CYTDtn	0	0.109597	0.0547987	0	0.390097	0.195048	Transport, Mitochondrial	Transport
CYTK1	0.135064	0.156315	0.145689	-0.00617425	-0.0724171	-0.0392957	Transport, Nuclear	Transport
CYTK10	-0.181192	-0.183191	-0.182192	0	0	0	Nucleotides	Nucleotides
CYTK10n	0	0	0	0	0	0	Nucleotides	Nucleotides
CYTK11	0.181192	0.171566	0.176379	0	0	0	Nucleotides	Nucleotides
CYTK11n	0	0	0	0	0	0	Nucleotides	Nucleotides
CYTK12	0	0	0	0	0	0	Nucleotides	Nucleotides
CYTK12n	0	0	0	0	0	0	Nucleotides	Nucleotides
CYTK13	0	0	0	0.0113547	0.0444761	0.0279154	Nucleotides	Nucleotides
CYTK13n	0	0	0	0	0	0	Nucleotides	Nucleotides
CYTK14	-0.182756	-0.17313	-0.177943	-0.0113547	-0.0444761	-0.0279154	Nucleotides	Nucleotides
CYTK14n	0	0	0	0	0	0	Nucleotides	Nucleotides
CYTK1m	0	0.0192035	0.00960173	0	0.0647117	0.0323558	Nucleotides	Nucleotides
CYTK1n	0	0	0	0	0	0	Nucleotides	Nucleotides
CYTK2	0	0	0	0	0	0	Nucleotides	Nucleotides
CYTK2n	0	0	0	0	0	0	Nucleotides	Nucleotides
CYTK3	0	0	0	0	0	0	Nucleotides	Nucleotides
CYTK3n	0	0	0	0	0	0	Nucleotides	Nucleotides
CYTK4	0	0	0	0	0	0	Nucleotides	Nucleotides
CYTK4n	0	0	0	0	0	0	Nucleotides	Nucleotides
CYTK5	0	0	0	0	0	0	Nucleotides	Nucleotides
CYTK5n	0	0	0	0	0	0	Nucleotides	Nucleotides
CYTK6	0.0238462	-0.0138582	0.00499399	0.00308712	-0.0535858	-0.0252493	Nucleotides	Nucleotides
CYTK6n	0	0	0	0	0	0	Nucleotides	Nucleotides
CYTK7	0	0	0	0	0	0	Nucleotides	Nucleotides
CYTK7n	0	0	0	0	0	0	Nucleotides	Nucleotides
CYTK8	0	0	0	0	0	0	Nucleotides	Nucleotides
CYTK8n	0	0	0	0	0	0	Nucleotides	Nucleotides
CYTK9	0	0	0	0	0	0	Nucleotides	Nucleotides
CYTK9n	0	0	0	0	0	0	Nucleotides	Nucleotides
CytOxe-	0	1.18906	0.594531	0	1.22011	0.610053	Nucleotides	Nucleotides
D-LACt2	-0.144324	0	-0.0721619	-0.535667	0	-0.267834	[]	Misc
D-LACtm	0	0	0	0	0	0	Transport, Extracellular	Transport
DADA	0	0.101372	0.0506862	0	0.307485	0.153742	Transport, Mitochondrial	Transport
DADAe	0	0.101372	0.0506862	0	0.307485	0.153742	Nucleotides	Nucleotides
DADNK	0.000580278	0.329373	0.164977	0	1.17029	0.585145	Nucleotides	Nucleotides
DADNt4	-0.101372	0	-0.0506862	-0.307485	0	-0.153742	Nucleotides	Nucleotides
DAG_HSter	0	0	0	0	0	0	Transport, Extracellular	Transport
DAGK_hs	-0.011265	0.327171	0.157953	0	1.17029	0.585145	Transport, Endoplasmic Reticular	Transport
DAGKn_hs	0	0	0	0	0	0	Glycerophospholipid Metabolism	Lipids
DAGt	-0.0166681	0	-0.00833405	0	0	0	Glycerophospholipid Metabolism	Lipids
DALAOXx	0	0.140971	0.0704854	0	0.204327	0.102163	Transport, Extracellular	Transport
DALAt2r	0	0	0	0	0	0	D-alanine metabolism	Amino Acids
DALAt2rL	0	0	0	0	0	0	Transport, Extracellular	Transport
DALAxt	0	0.140971	0.0704854	0	0.204327	0.102163	Transport, Lysosomal	Transport
DASCBH	0	0	0	0	0	0	D-alanine metabolism	Amino Acids
DASCBR	0	0.126459	0.0632293	0	0.305026	0.152513	Ascorbate and Aldarate Metabolism	Vitamins
DASPO1p	0	0	0	0	0	0	Ascorbate and Aldarate Metabolism	Vitamins
DATPtn	0	0.0197826	0.00989129	0	0.02615	0.013075	Alanine and Aspartate Metabolism	Amino Acids
DCK1n	0	0	0	0	0	0	Transport, Nuclear	Transport
DCK2n	0	0	0	0	0	0	Nucleotides	Nucleotides
DCMPDA	-0.328212	0.0678303	-0.130191	-1.17029	0.248131	-0.46108	Nucleotides	Nucleotides
DCSPTN1COAtx	0	0	0	0	0	0	Pyrimidine Catabolism	Nucleotides
DCSPTN1CPT1	0	0	0	0	0	0	Transport, Peroxisomal	Transport
DCSPTN1CPT2	0	0	0	0	0	0	Carnitine shuttle	FAS
DCSPTN1CRNt	0	0	0	0	0	0	Carnitine shuttle	FAS
DCSPTN1t	0	0	0	0	0	0	Carnitine shuttle	FAS
DCTPtn	0	0.0299275	0.0149638	0	0.0435833	0.0217916	Transport, Extracellular	Transport
DCYTD	0	0.329373	0.164686	0	1.17029	0.585145	Transport, Nuclear	Transport
DCYTt	-0.0356289	0	-0.0178144	-0.0435833	0	-0.0217916	Pyrimidine Catabolism	Nucleotides
DEBRISOQUINEt	0	0	0	0	0	0	Transport, Extracellular	Transport
DEDOLP1_L	0	0	0	0	0	0	Transport, Extracellular	Transport
DEDOLP1_U	0	0	0	0	0	0	N-Glycan Biosynthesis	Glycosylation
DEDOLP2_L	0	0	0	0	0	0	N-Glycan Biosynthesis	Glycosylation
DEDOLP2_U	0	0	0	0	0	0	N-Glycan Biosynthesis	Glycosylation
DEDOLR_L	0	0	0	0	0	0	N-Glycan Biosynthesis	Glycosylation
DEDOLR_U	0	0	0	0	0	0	N-Glycan Biosynthesis	Glycosylation
DESAT16_2	3.29962e-05	0.10258	0.0513067	0	0.300893	0.150446	N-Glycan Biosynthesis	Glycosylation
DESAT18_10	0	0	0	0	0	0	Fatty acid elongation	FAS
DESAT18_3	0	0.0540013	0.0270006	0	0.175551	0.0877753	Fatty acid elongation	FAS
DESAT18_4	0	0.0894673	0.0447337	0	0.250903	0.125451	Fatty acid elongation	FAS
DESAT18_5	0	0.0894673	0.0447337	0	0.250903	0.125451	Fatty acid elongation	FAS
DESAT18_6	0	0.0545046	0.0272523	0	0.157397	0.0786985	Fatty acid elongation	FAS
DESAT18_7	0	0.0449566	0.0224783	0	0.146594	0.0732969	Fatty acid elongation	FAS
DESAT18_8	0	0.0449566	0.0224783	0	0.146594	0.0732969	Fatty acid elongation	FAS
DESAT18_9	0	0	0	0	0	0	Fatty acid elongation	FAS
DESAT20_1	0	0	0	0	0	0	Fatty acid elongation	FAS
DESAT20_2	0	0	0	0	0	0	Fatty acid elongation	FAS
DESAT22_1p	0	0	0	0	0	0	Fatty acid elongation	FAS
DESAT22_2p	0	0	0	0	0	0	Fatty acid elongation	FAS
DESAT24_1	0	0	0	0	0	0	Fatty acid elongation	FAS
DGAT	7.40336e-05	0.018724	0.00939901	0	0	0	Fatty acid elongation	FAS
DGCHOLte	0	0	0	0	0	0	Triacylglycerol Synthesis	Lipids
DGK1	-0.0682714	-0.000403244	-0.0343373	-0.248131	0	-0.124065	Transport, Extracellular	Transport
DGK2m	0	0.0272308	0.0136154	0	0.0653749	0.0326875	Nucleotides	Nucleotides
DGNSKm	0	0.0272308	0.0136154	0	0.0653749	0.0326875	Nucleotides	Nucleotides
DGSNt	-0.0215302	0	-0.0107651	-0.02615	0	-0.013075	Nucleotides	Nucleotides
DGSNtm	0	0.0272308	0.0136154	0	0.0653749	0.0326875	Transport, Extracellular	Transport
DGTPtn	0	0.0214552	0.0107276	0	0.02615	0.013075	Transport, Mitochondrial	Transport
DGULND	0	0.126626	0.0633129	0	0.396123	0.198062	Transport, Nuclear	Transport
DHAAt1r	0	0	0	0	0	0	Pentose and Glucuronate Interconversions	Central Metabolism
DHAPA	0	0	0	0	0	0	Transport, Extracellular	Transport
DHAPAx	0	0	0	0	0	0	Triacylglycerol Synthesis	Lipids
DHCHOLESTANATEtm	0	0	0	0	0	0	Triacylglycerol Synthesis	Lipids
DHCR241r	0	0.00605264	0.00302632	0	0.0191578	0.00957889	Transport, Peroxisomal	Transport
DHCR242r	0	0.00605264	0.00302632	0	0.0191578	0.00957889	Cholesterol Metabolism	Steriods
DHCR243r	0	0.00596953	0.00298477	0	0.0188973	0.00944863	Cholesterol Metabolism	Steriods
DHCR71r	0	0.00596953	0.00298477	0	0.0188973	0.00944863	Cholesterol Metabolism	Steriods
DHCR72r	0	0.00596953	0.00298477	0	0.0188973	0.00944863	Cholesterol Metabolism	Steriods
DHCRD1	0	0.0552525	0.0276262	0	0.13075	0.0653749	Cholesterol Metabolism	Steriods
DHCRD2	0	0.00558049	0.00279025	0	0.017584	0.00879201	Sphingolipid Metabolism	Lipids
DHDPBMTm	0	0	0	0	0	0	Sphingolipid Metabolism	Lipids
DHEASt	0	0	0	0	0	0	Ubiquinone Biosynthesis	Vitamins
DHEAStr	0	0	0	0	0	0	Transport, Extracellular	Transport
DHEAtr	0	0	0	0	0	0	Transport, Extracellular	Transport
DHFR	0.000580278	0.0487794	0.0246798	0	0.0653749	0.0326875	Transport, Endoplasmic Reticular	Transport
DHFtl	-0.0821981	0	-0.0410991	-0.292573	0	-0.146286	Folate Metabolism	Vitamins
DHFtm	0	0.0657585	0.0328792	0	0.234058	0.117029	Transport, Lysosomal	Transport
DHORD9	0.00336987	0.0571578	0.0302639	0.00826754	0.0736425	0.040955	Transport, Mitochondrial	Transport
DHORTS	-0.0571578	-0.00336987	-0.0302639	-0.0736425	-0.00826754	-0.040955	Pyrimidine Biosynthesis	Nucleotides
DHPM1	0	0	0	0	0	0	Pyrimidine Biosynthesis	Nucleotides
DHPR	0	0.0123354	0.00616771	0	0.013643	0.00682151	Pyrimidine Catabolism	Nucleotides
DHPR2	0	0.0123354	0.00616771	0	0.013643	0.00682151	Tetrahydrobiopterin	Vitamins
DIDPtn	0	0	0	0	0	0	Tetrahydrobiopterin	Vitamins
DIGALSGALSIDEte	0	0	0	0	0	0	Transport, Nuclear	Transport
DIGALSIDEtl	0	0	0	0	0	0	Transport, Extracellular	Transport
DINt	-0.0257746	0.101372	0.0377989	-0.0326875	0.307485	0.137399	Transport, Lysosomal	Transport
DITPtn	0	0	0	0	0	0	Transport, Extracellular	Transport
DLNLCGCPT1	0	0	0	0	0	0	Transport, Nuclear	Transport
DLNLCGCPT2	0	0	0	0	0	0	Carnitine shuttle	FAS
DLNLCGCRNt	0	0	0	0	0	0	Carnitine shuttle	FAS
DLNLCGt	0	0	0	0	0	0	Carnitine shuttle	FAS
DM_13-cis-oretn(n)	0	0	0	0	0	0	Transport, Extracellular	Transport
DM_13-cis-retn(n)	0	0	0	0	0	0	[]	Misc
DM_Asn-X-Ser/Thr(ly)	0	0	0	0	0	0	[]	Misc
DM_atp(c)	0	0.328792	0.164396	0	1.17029	0.585145	[]	Misc
DM_avite1(c)	0	0	0	0	0	0	[]	Misc
DM_avite2(c)	0	0	0	0	0	0	[]	Misc
DM_bvite(c)	0	0	0	0	0	0	[]	Misc
DM_datp(m)	0	0.0187545	0.00937727	0	0.02615	0.013075	[]	Misc
DM_datp(n)	0	0.0197826	0.00989129	0	0.02615	0.013075	[]	Misc
DM_dctp(m)	0	0.0272487	0.0136244	0	0.0435833	0.0217916	[]	Misc
DM_dctp(n)	0	0.0299275	0.0149638	0	0.0435833	0.0217916	[]	Misc
DM_dgtp(m)	0	0.0206553	0.0103277	0	0.02615	0.013075	[]	Misc
DM_dgtp(n)	0	0.0214552	0.0107276	0	0.02615	0.013075	[]	Misc
DM_dsT_antigen(g)	0	0	0	0	0	0	[]	Misc
DM_dttp(m)	0	0.026967	0.0134835	0	0.0653749	0.0326875	[]	Misc
DM_dttp(n)	0	0.0295236	0.0147618	0	0.0653749	0.0326875	[]	Misc
DM_ethamp(r)	0	0.0550622	0.0275311	0	0.13075	0.0653749	[]	Misc
DM_gpi_sig(er)	0	0	0	0	0	0	[]	Misc
DM_kdn(c)	0	0.0642839	0.032142	0	0.211766	0.105883	[]	Misc
DM_m(em)3gacpail_prot_hs(r)	0	0	0	0	0	0	[]	Misc
DM_mem2emgacpail_prot_hs(r)	0	0	0	0	0	0	[]	Misc
DM_n5m2masn(g)	0	0	0	0	0	0	[]	Misc
DM_oretn(n)	0	0	0	0	0	0	[]	Misc
DM_Ser-Gly/Ala-X-Gly(ly)	0	0	0	0	0	0	[]	Misc
DM_Ser/Thr(ly)	0	0	0	0	0	0	[]	Misc
DM_sprm(c)	0	0	0	0	0	0	[]	Misc
DM_sTn_antigen(g)	0	0	0	0	0	0	[]	Misc
DM_T_antigen(g)	0	0	0	0	0	0	[]	Misc
DM_yvite(c)	0	0	0	0	0	0	[]	Misc
DMATT	0	0	0	0	0	0	[]	Misc
DMATTx	0.00113008	0.0121053	0.00661769	0	0.0383156	0.0191578	Cholesterol Metabolism	Steriods
DMHPTCRNCPT1	0	0	0	0	0	0	Cholesterol Metabolism	Steriods
DMHPTCRNCPT2	0	0	0	0	0	0	Carnitine shuttle	FAS
DMHPTCRNt	0	0	0	0	0	0	Carnitine shuttle	FAS
DMHPTCRNte	0	0	0	0	0	0	Carnitine shuttle	FAS
DMNONCRNCPT2	0	0	0	0	0	0	Transport, Extracellular	Transport
DMNONCRNt	0	0	0	0	0	0	Carnitine shuttle	FAS
DNADDP	0	0.164396	0.0821981	0	0.585145	0.292573	Carnitine shuttle	FAS
DNADtn	-0.460203	0	-0.230102	-1.01916	0	-0.509578	NAD Metabolism	Vitamins
DNAMTn	0	0	0	0	0	0	Transport, Nuclear	Transport
DNAMTSEn	0	0	0	0	0	0	Methionine Metabolism	Amino Acids
DNDPt10m	0	0	0	0	0	0	Selenoamino acid metabolism	Amino Acids
DNDPt11m	0	0.00285232	0.00142616	0	0	0	Transport, Mitochondrial	Transport
DNDPt12m	0	0.0274619	0.013731	0	0.0653749	0.0326875	Transport, Mitochondrial	Transport
DNDPt13m	0	0.0274619	0.013731	0	0.0653749	0.0326875	Transport, Mitochondrial	Transport
DNDPt14m	0	0	0	0	0	0	Transport, Mitochondrial	Transport
DNDPt15m	0	0.0260805	0.0130402	0	0.0608591	0.0304296	Transport, Mitochondrial	Transport
DNDPt16m	0	0.0260805	0.0130402	0	0.00451581	0.0022579	Transport, Mitochondrial	Transport
DNDPt17m	0	0	0	0	0	0	Transport, Mitochondrial	Transport
DNDPt18m	0	0.0274619	0.013731	0	0.0653749	0.0326875	Transport, Mitochondrial	Transport
DNDPt19m	0	0.0274619	0.013731	0	0.0653749	0.0326875	Transport, Mitochondrial	Transport
DNDPt1m	0	0.0274619	0.013731	0	0.0653749	0.0326875	Transport, Mitochondrial	Transport
DNDPt20m	0	0.0274619	0.013731	0	0.0653749	0.0326875	Transport, Mitochondrial	Transport
DNDPt21m	0	0.0274619	0.013731	0	0.0653749	0.0326875	Transport, Mitochondrial	Transport
DNDPt22m	0	0	0	0	0.0653749	0.0326875	Transport, Mitochondrial	Transport
DNDPt23m	0	0.0246096	0.0123048	0	0.0652093	0.0326046	Transport, Mitochondrial	Transport
DNDPt24m	0	0	0	0	0.0652093	0.0326046	Transport, Mitochondrial	Transport
DNDPt25m	0	0	0	0	0	0	Transport, Mitochondrial	Transport
DNDPt26m	0	0.0157671	0.00788355	0	0	0	Transport, Mitochondrial	Transport
DNDPt27m	0	0.0204283	0.0102141	0	0	0	Transport, Mitochondrial	Transport
DNDPt28m	0	0.0241076	0.0120538	0	0.0652093	0.0326046	Transport, Mitochondrial	Transport
DNDPt29m	0	0	0	0	0	0	Transport, Mitochondrial	Transport
DNDPt2m	0	0.0274619	0.013731	0	0.0653749	0.0326875	Transport, Mitochondrial	Transport
DNDPt30m	0	0.0274619	0.013731	0	0.0653749	0.0326875	Transport, Mitochondrial	Transport
DNDPt31m	0	0.0274619	0.013731	0	0.0653749	0.0326875	Transport, Mitochondrial	Transport
DNDPt32m	0	0.0274619	0.013731	0	0.0653749	0.0326875	Transport, Mitochondrial	Transport
DNDPt33m	0	0	0	0	0	0	Transport, Mitochondrial	Transport
DNDPt34m	0	0	0	0	0	0	Transport, Mitochondrial	Transport
DNDPt35m	0	0	0	0	0	0	Transport, Mitochondrial	Transport
DNDPt36m	0	0	0	0	0	0	Transport, Mitochondrial	Transport
DNDPt37m	0	0.0249113	0.0124557	0	0	0	Transport, Mitochondrial	Transport
DNDPt38m	0	0	0	0	0	0	Transport, Mitochondrial	Transport
DNDPt39m	0	0.0249113	0.0124557	0	0.0653749	0.0326875	Transport, Mitochondrial	Transport
DNDPt3m	0	0	0	0	0.0113027	0.00565134	Transport, Mitochondrial	Transport
DNDPt40m	0	0	0	0	0	0	Transport, Mitochondrial	Transport
DNDPt41m	0	0	0	0	0	0	Transport, Mitochondrial	Transport
DNDPt42m	0	0.0274619	0.013731	0	0.0653749	0.0326875	Transport, Mitochondrial	Transport
DNDPt43m	0	0.0274619	0.013731	0	0.0653749	0.0326875	Transport, Mitochondrial	Transport
DNDPt44m	0	0.0274619	0.013731	0	0.0653749	0.0326875	Transport, Mitochondrial	Transport
DNDPt45m	0	0.0274619	0.013731	0	0.0653749	0.0326875	Transport, Mitochondrial	Transport
DNDPt46m	0	0	0	0	0.0653749	0.0326875	Transport, Mitochondrial	Transport
DNDPt47m	0	0	0	0	0	0	Transport, Mitochondrial	Transport
DNDPt48m	0	0.0267224	0.0133612	0	0.0653749	0.0326875	Transport, Mitochondrial	Transport
DNDPt49m	0	0	0	0	0.0653749	0.0326875	Transport, Mitochondrial	Transport
DNDPt4m	0	0.00285232	0.00142616	0	0	0	Transport, Mitochondrial	Transport
DNDPt50m	0	0	0	0	0.0653749	0.0326875	Transport, Mitochondrial	Transport
DNDPt51m	0	0	0	0	0	0	Transport, Mitochondrial	Transport
DNDPt52m	0	0.0185596	0.00927981	0	0.0653749	0.0326875	Transport, Mitochondrial	Transport
DNDPt53m	0	0.0267106	0.0133553	0	0.0653749	0.0326875	Transport, Mitochondrial	Transport
DNDPt54m	0	0	0	0	0	0	Transport, Mitochondrial	Transport
DNDPt55m	0	0.0274619	0.013731	0	0.0653749	0.0326875	Transport, Mitochondrial	Transport
DNDPt56m	0	0.0274619	0.013731	0	0.0653749	0.0326875	Transport, Mitochondrial	Transport
DNDPt57m	0	0.0274619	0.013731	0	0.0653749	0.0326875	Transport, Mitochondrial	Transport
DNDPt58m	0	0.0274619	0.013731	0	0.0653749	0.0326875	Transport, Mitochondrial	Transport
DNDPt59m	0	0	0	0	0	0	Transport, Mitochondrial	Transport
DNDPt5m	0	0.0229137	0.0114569	0	0	0	Transport, Mitochondrial	Transport
DNDPt60m	0	0	0	0	0	0	Transport, Mitochondrial	Transport
DNDPt61m	0	0	0	0	0	0	Transport, Mitochondrial	Transport
DNDPt62m	0	0	0	0	0	0	Transport, Mitochondrial	Transport
DNDPt63m	0	0	0	0	0	0	Transport, Mitochondrial	Transport
DNDPt6m	0	0.0229137	0.0114569	0	0.0653749	0.0326875	Transport, Mitochondrial	Transport
DNDPt7m	0	0	0	0	0	0	Transport, Mitochondrial	Transport
DNDPt8m	0	0	0	0	0	0	Transport, Mitochondrial	Transport
DNDPt9m	0	0	0	0	0	0	Transport, Mitochondrial	Transport
DOGULND1	0	0	0	0	0	0	Transport, Mitochondrial	Transport
DOGULND2	0	0	0	0	0	0	Ascorbate and Aldarate Metabolism	Vitamins
DOGULNO1	0	0	0	0	0	0	Ascorbate and Aldarate Metabolism	Vitamins
DOGULNO2	0	0	0	0	0	0	Ascorbate and Aldarate Metabolism	Vitamins
DOLASNT_Ler	0	0.0113377	0.00566884	0	0.0403549	0.0201774	Ascorbate and Aldarate Metabolism	Vitamins
DOLASNT_Uer	0	0.0113377	0.00566884	0	0.0403549	0.0201774	N-Glycan Biosynthesis	Glycosylation
DOLDPP_Ler	0	0.0113377	0.00566884	0	0.0403549	0.0201774	N-Glycan Biosynthesis	Glycosylation
DOLDPP_Uer	0	0.0113377	0.00566884	0	0.0403549	0.0201774	N-Glycan Biosynthesis	Glycosylation
DOLGLCP_Lter	0	0.164396	0.0821981	0	0.585145	0.292573	N-Glycan Biosynthesis	Glycosylation
DOLGLCP_Uter	0	0.164396	0.0821981	0	0.585145	0.292573	N-Glycan Biosynthesis	Glycosylation
DOLGPP_Ler	0	0.164396	0.0821981	0	0.585145	0.292573	N-Glycan Biosynthesis	Glycosylation
DOLGPP_Uer	0	0.164396	0.0821981	0	0.585145	0.292573	N-Glycan Biosynthesis	Glycosylation
DOLICHOL_Lter	0	0.109597	0.0547987	0	0.390097	0.195048	N-Glycan Biosynthesis	Glycosylation
DOLICHOL_Uter	0	0.109597	0.0547987	0	0.390097	0.195048	N-Glycan Biosynthesis	Glycosylation
DOLK_L	0	0.109597	0.0547987	0	0.390097	0.195048	N-Glycan Biosynthesis	Glycosylation
DOLK_U	0	0.109597	0.0547987	0	0.390097	0.195048	N-Glycan Biosynthesis	Glycosylation
DOLMANP_Lter	0	0.0453507	0.0226753	0	0.161419	0.0807097	N-Glycan Biosynthesis	Glycosylation
DOLMANP_Uter	0	0.0453507	0.0226753	0	0.161419	0.0807097	N-Glycan Biosynthesis	Glycosylation
DOLP_Lter	0	0.164396	0.0821981	0	0.585145	0.292573	N-Glycan Biosynthesis	Glycosylation
DOLP_Uter	0	0.164396	0.0821981	0	0.585145	0.292573	N-Glycan Biosynthesis	Glycosylation
DOLPGT1_Ler	0	0.0113377	0.00566884	0	0.0403549	0.0201774	N-Glycan Biosynthesis	Glycosylation
DOLPGT1_Uer	0	0.0113377	0.00566884	0	0.0403549	0.0201774	N-Glycan Biosynthesis	Glycosylation
DOLPGT2_Ler	0	0.0113377	0.00566884	0	0.0403549	0.0201774	N-Glycan Biosynthesis	Glycosylation
DOLPGT2_Uer	0	0.0113377	0.00566884	0	0.0403549	0.0201774	N-Glycan Biosynthesis	Glycosylation
DOLPGT3_Ler	0	0.0113377	0.00566884	0	0.0403549	0.0201774	N-Glycan Biosynthesis	Glycosylation
DOLPGT3_Uer	0	0.0113377	0.00566884	0	0.0403549	0.0201774	N-Glycan Biosynthesis	Glycosylation
DOLPH_Ler	0	0.109597	0.0547987	0	0.390097	0.195048	N-Glycan Biosynthesis	Glycosylation
DOLPH_Uer	0	0.109597	0.0547987	0	0.390097	0.195048	N-Glycan Biosynthesis	Glycosylation
DOLPMT_L	0	0.0453507	0.0226753	0	0.161419	0.0807097	N-Glycan Biosynthesis	Glycosylation
DOLPMT_U	0	0.0453507	0.0226753	0	0.161419	0.0807097	N-Glycan Biosynthesis	Glycosylation
DOLPMT1_Ler	0	0.0113377	0.00566884	0	0.0403549	0.0201774	N-Glycan Biosynthesis	Glycosylation
DOLPMT1_Uer	0	0.0113377	0.00566884	0	0.0403549	0.0201774	N-Glycan Biosynthesis	Glycosylation
DOLPMT2_Ler	0	0.0113377	0.00566884	0	0.0403549	0.0201774	N-Glycan Biosynthesis	Glycosylation
DOLPMT2_Uer	0	0.0113377	0.00566884	0	0.0403549	0.0201774	N-Glycan Biosynthesis	Glycosylation
DOLPMT3_Ler	0	0.0113377	0.00566884	0	0.0403549	0.0201774	N-Glycan Biosynthesis	Glycosylation
DOLPMT3_Uer	0	0.0113377	0.00566884	0	0.0403549	0.0201774	N-Glycan Biosynthesis	Glycosylation
DOLPMT4_Ler	0	0.0113377	0.00566884	0	0.0403549	0.0201774	N-Glycan Biosynthesis	Glycosylation
DOLPMT4_Uer	0	0.0113377	0.00566884	0	0.0403549	0.0201774	N-Glycan Biosynthesis	Glycosylation
DOPABMO	0	0	0	0	0	0	N-Glycan Biosynthesis	Glycosylation
DOPAMT	0	0	0	0	0	0	Tyrosine metabolism	Amino Acids
DOPASFt	0	0	0	0	0	0	Tyrosine metabolism	Amino Acids
DOPASULT	0	0	0	0	0	0	Transport, Extracellular	Transport
DOPAt4(2)r	0	0	0	0	0	0	Tyrosine metabolism	Amino Acids
DOPAtu	0	0.493189	0.246594	0	1.75544	0.877718	Transport, Extracellular	Transport
DOPAVESSEC	0	0.164396	0.0821981	0	0.585145	0.292573	Transport, Extracellular	Transport
DPCOAK	0	0	0	0	0	0	Transport, Extracellular	Transport
DPCOAPP	0	0.164396	0.0821981	0	0.585145	0.292573	CoA Biosynthesis	Vitamins
DPCOAtl	0	0	0	0	0	0	CoA Catabolism	Vitamins
DPHMBDCm	0	0	0	0	0	0	Transport, Lysosomal	Transport
DPMVDx	0.00339025	0.0363159	0.0198531	0	0.114947	0.0574734	Ubiquinone Biosynthesis	Vitamins
DRIBt	-0.0666697	0	-0.0333349	-0.248131	0	-0.124065	Cholesterol Metabolism	Steriods
DRPA	0	0	0	0	0	0	Transport, Extracellular	Transport
DSAT	0.00019031	0.0552525	0.0277214	0	0.13075	0.0653749	Pentose Phosphate Pathway	Central Metabolism
DTDPtn	0	0	0	0	0	0	Sphingolipid Metabolism	Lipids
DTMPK	0	0.0295236	0.0147618	0	0.0653749	0.0326875	Transport, Nuclear	Transport
DTTPtn	0	0	0	0	0.0653749	0.0326875	Nucleotides	Nucleotides
DUDPtn	0	0	0	0	0	0	Transport, Nuclear	Transport
DUMPtn	0	0	0	0	0	0	Transport, Nuclear	Transport
DURAD	0	0	0	0	0	0	Transport, Nuclear	Transport
DURAD2	0	0	0	0	0	0	Pyrimidine Catabolism	Nucleotides
DURIK1	0	0.328792	0.164396	0	1.17029	0.585145	Pyrimidine Catabolism	Nucleotides
DURIK1m	0	0.410991	0.205495	0	1.46286	0.731432	Nucleotides	Nucleotides
DURIPP	-0.0488332	0.06725	0.00920842	-0.0653749	0.248131	0.0913779	Nucleotides	Nucleotides
DURIt	-0.036475	0	-0.0182375	-0.0653749	0	-0.0326875	Nucleotides	Nucleotides
DURItn	0	0	0	0	0	0	Transport, Extracellular	Transport
DUTPDPm	0	0.205495	0.102748	0	0.731432	0.365716	Transport, Nuclear	Transport
DUTPDPn	0	0	0	0	0	0	Nucleotides	Nucleotides
EAFLATOXINte	0	0	0	0	0	0	Nucleotides	Nucleotides
EBASTINEOHte	0	0	0	0	0	0	Transport, Extracellular	Transport
EBASTINEte	0	0	0	0	0	0	Transport, Extracellular	Transport
EBP1r	0	0.00605264	0.00302632	0	0.0191578	0.00957889	Transport, Extracellular	Transport
EBP2r	0	0.00605264	0.00302632	0	0.0191578	0.00957889	Cholesterol Metabolism	Steriods
ECOAH12m	0	0.000626959	0.00031348	0	0.00279414	0.00139707	Cholesterol Metabolism	Steriods
ECOAH1m	0	0	0	0	0	0	Valine, Leucine, and Isoleucine Metabolism	Amino Acids
ECOAH1x	0	0	0	0	0	0	Tryptophan metabolism	Amino Acids
ECOAH9m	0	0	0	0	0	0	Tryptophan metabolism	Amino Acids
EGMESTr	0	0	0	0	0	0	Valine, Leucine, and Isoleucine Metabolism	Amino Acids
EHGLAT	0	0	0	0	0	0	Alkaloid biosynthesis II	Vitamins
EHGLAT2m	0	0	0	0	0	0	Arginine and Proline Metabolism	Amino Acids
EHGLATm	0	0	0	0	0	0	Arginine and Proline Metabolism	Amino Acids
EICOSTETCPT1	0	0	0	0	0	0	Arginine and Proline Metabolism	Amino Acids
EICOSTETCPT2	0	0	0	0	0	0	Carnitine shuttle	FAS
EICOSTETCRNt	0	0	0	0	0	0	Carnitine shuttle	FAS
EICOSTETt	0	0	0	0	0	0	Carnitine shuttle	FAS
ELAIDCPT1	0	0.0399866	0.0199933	0	0.0399866	0.0199933	Transport, Extracellular	Transport
ELAIDCPT2	0	0.0399866	0.0199933	0	0.0399866	0.0199933	Carnitine shuttle	FAS
ELAIDCRNt	0	0.0399866	0.0199933	0	0.0399866	0.0199933	Carnitine shuttle	FAS
ELAIDt	-0.0894673	0	-0.0447337	-0.216082	0	-0.108041	Carnitine shuttle	FAS
ENGASE	0	0	0	0	0	0	Transport, Extracellular	Transport
ENGASE2	0	0	0	0	0	0	N-Glycan Degradation	Glycosylation
ENGASE2ly	0	0.0113377	0.00566884	0	0.0403549	0.0201774	N-Glycan Degradation	Glycosylation
ENMAN1g	0	0	0	0	0	0	N-Glycan Degradation	Glycosylation
ENMAN2g	0	0	0	0	0	0	N-Glycan Biosynthesis	Glycosylation
ENMAN3g	0	0	0	0	0	0	N-Glycan Biosynthesis	Glycosylation
ENMAN4g	0	0	0	0	0	0	N-Glycan Biosynthesis	Glycosylation
ENMAN5g	0	0	0	0	0	0	N-Glycan Biosynthesis	Glycosylation
ENMAN6g	0	0	0	0	0	0	N-Glycan Biosynthesis	Glycosylation
ENO	-0.060255	0.184362	0.0620534	-0.275134	0.489291	0.107079	N-Glycan Biosynthesis	Glycosylation
ESTRADIOLGLCt	0	0.328792	0.164396	0	1.17029	0.585145	Glycolysis/Gluconeogenesis	Central Metabolism
ESTRADIOLGLCt2	0	0.328792	0.164396	0	1.17029	0.585145	Transport, Extracellular	Transport
ESTRADIOLGLCtr	0	0	0	0	0	0	Transport, Extracellular	Transport
ESTRADIOLt	0	0	0	0	0	0	Transport, Endoplasmic Reticular	Transport
ESTRADIOLtr	0	0	0	0	0	0	Transport, Extracellular	Transport
ESTRIOLGLCte	0	0	0	0	0	0	Transport, Endoplasmic Reticular	Transport
ESTRIOLGLCtr	0	0	0	0	0	0	Transport, Extracellular	Transport
ESTRONEGLCt	0	0	0	0	0	0	Transport, Endoplasmic Reticular	Transport
ESTRONEGLCtr	0	0	0	0	0	0	Transport, Extracellular	Transport
ESTRONESt	0	0	0	0	0	0	Transport, Endoplasmic Reticular	Transport
ESTRONESt2	0	0	0	0	0	0	Transport, Extracellular	Transport
ESTRONEtr	0	0	0	0	0	0	Transport, Extracellular	Transport
ESTSULT	0	0.109597	0.0547987	0	0.390097	0.195048	Transport, Endoplasmic Reticular	Transport
ETF	0	0.591161	0.29558	0	0.601785	0.300893	Steroid Metabolism	Steriods
ETFQO	0	0.591161	0.29558	0	0.601785	0.300893	Fatty acid oxidation	UFAS
ETHAK	0	0.330431	0.165216	0	1.17029	0.585145	Fatty acid oxidation	UFAS
ETHP	0	0.328792	0.164396	0	1.17029	0.585145	Glycerophospholipid Metabolism	Lipids
ETOHMO	0	0	0	0	0	0	Glycerophospholipid Metabolism	Lipids
ETOHt	0	0	0	0	0	0	Glycolysis/Gluconeogenesis	Central Metabolism
ETOHtx	0	0	0	0	0	0	Transport, Extracellular	Transport
EX_10fthf(e)	0	0	0	0	0	0	Transport, Peroxisomal	Transport
EX_10fthf5glu(e)	0	0	0	0	0	0	[]	Transport
EX_10fthf6glu(e)	0	0	0	0	0	0	[]	Transport
EX_10fthf7glu(e)	0	0	0	0	0	0	[]	Transport
EX_11-cis-retfa(e)	0	0	0	0	0	0	[]	Transport
EX_13-cis-retnglc(e)	0	0	0	0	0	0	[]	Transport
EX_1glyc_hs(e)	0	0.0420632	0.0210316	0	0.150733	0.0753663	[]	Transport
EX_1mncam(e)	0	0	0	0	0	0	[]	Transport
EX_2425dhvitd2(e)	0	0	0	0	0	0	[]	Transport
EX_2425dhvitd3(e)	0	0.00486126	0.00243063	0	0.0170581	0.00852904	[]	Transport
EX_24nph(e)	0	0	0	0	0	0	[]	Transport
EX_25hvitd2(e)	0	0	0	0	0	0	[]	Transport
EX_25hvitd3(e)	0	0.00515547	0.00257774	0	0.0180471	0.00902353	[]	Transport
EX_2hb(e)	0	0.00838558	0.00419279	0	0.00451581	0.0022579	[]	Transport
EX_2mcit(e)	0	0.00838558	0.00419279	0	0.00451581	0.0022579	[]	Transport
EX_35cgmp(e)	0	0.0206424	0.0103212	0	0.02615	0.013075	[]	Transport
EX_3aib(e)	0	0.000626959	0.00031348	0	0.00279414	0.00139707	[]	Transport
EX_3mlda(e)	0	0.00584639	0.0029232	0	0.00732614	0.00366307	[]	Transport
EX_4abut(e)	0	0.0697299	0.0348649	0	0.13075	0.0653749	[]	Transport
EX_4hdebrisoquine(e)	0	0	0	0	0	0	[]	Transport
EX_4hphac(e)	0	0	0	0	0.00434695	0.00217348	[]	Transport
EX_4mptnl(e)	0	0	0	0	0	0	[]	Transport
EX_4nph(e)	0	0	0	0	0	0	[]	Transport
EX_4nphsf(e)	0	0	0	0	0	0	[]	Transport
EX_4pyrdx(e)	0	0	0	0	0	0	[]	Transport
EX_5adtststerone(e)	0	0	0	0	0	0	[]	Transport
EX_5adtststeroneglc(e)	0	0	0	0	0	0	[]	Transport
EX_5dhf(e)	0	0	0	0	0	0	[]	Transport
EX_5fthf(e)	0	0	0	0	0	0	[]	Transport
EX_5htrp(e)	0	0.00811912	0.00405956	0	0.00772244	0.00386122	[]	Transport
EX_5mthf(e)	0	0	0	0	0	0	[]	Transport
EX_5thf(e)	0	0	0	0	0	0	[]	Transport
EX_6dhf(e)	0	0	0	0	0	0	[]	Transport
EX_6htststerone(e)	0	0	0	0	0	0	[]	Transport
EX_6thf(e)	0	0	0	0	0	0	[]	Transport
EX_7dhf(e)	0	0	0	0	0	0	[]	Transport
EX_7thf(e)	0	0	0	0	0	0	[]	Transport
EX_9-cis-retfa(e)	0	0	0	0	0	0	[]	Transport
EX_abt(e)	0	0.071116	0.035558	0	0.263824	0.131912	[]	Transport
EX_ac(e)	0	0.518135	0.259068	0	0.879674	0.439837	[]	Transport
EX_acac(e)	0	0.307198	0.153599	0	0.441931	0.220965	[]	Transport
EX_acald(e)	0	0	0	0	0	0	[]	Transport
EX_acetone(e)	0	0.321398	0.160699	0	0.441931	0.220965	[]	Transport
EX_acgalfucgalacgalfuc12gal14acglcgalgluside_hs(e)	0	0	0	0	0	0	[]	Transport
EX_acgalfucgalacgalfucgalacglcgal14acglcgalgluside_hs(e)	0	0	0	0	0	0	[]	Transport
EX_acgam(e)	0	0	0	0	0	0	[]	Transport
EX_ach(e)	0	0	0	0	0	0	[]	Transport
EX_acn13acngalgbside_hs(e)	0	0	0	0	0	0	[]	Transport
EX_acn23acngalgbside_hs(e)	0	0	0	0	0	0	[]	Transport
EX_acnacngal14acglcgalgluside_hs(e)	0	0	0	0	0	0	[]	Transport
EX_acnacngalgbside_hs(e)	0	0	0	0	0	0	[]	Transport
EX_acngalacglcgal14acglcgalgluside_hs(e)	0	0	0	0	0	0	[]	Transport
EX_ade(e)	0	0.0215302	0.0107651	0	0.02615	0.013075	[]	Transport
EX_adn(e)	0	0.0215302	0.0107651	0	0.02615	0.013075	[]	Transport
EX_adp	0	0	0	0	0	0	[]	Transport
EX_adprbp(e)	0	0	0	0	0	0	[]	Transport
EX_adprib(e)	0	0	0	0	0	0	[]	Transport
EX_adrn(e)	0	0	0	0	0	0	[]	Transport
EX_adrnl(e)	0	0	0	0	0	0	[]	Transport
EX_aflatoxin(e)	0	0	0	0	0	0	[]	Transport
EX_ahandrostanglc(e)	0	0	0	0	0	0	[]	Transport
EX_ak2lgchol_hs(e)	0	0	0	0	0	0	[]	Transport
EX_akg(e)	0	0.215523	0.107762	0	0.305698	0.152849	[]	Transport
EX_ala-B(e)	0	0	0	0	0	0	[]	Transport
EX_ala-D(e)	0	0.107651	0.0538255	0	0.13075	0.0653749	[]	Transport
EX_ala-L(e)	0	0.107651	0.0538255	0	0.13075	0.0653749	[]	Transport
EX_aldstrn(e)	0	0	0	0	0	0	[]	Transport
EX_amp(e)	0	0	0	0	0	0	[]	Transport
EX_andrstrn(e)	0	0	0	0	0	0	[]	Transport
EX_andrstrnglc(e)	0	0	0	0	0	0	[]	Transport
EX_aqcobal(e)	0	0	0	0	0	0	[]	Transport
EX_arab-L(e)	0	0	0	0	0	0	[]	Transport
EX_arach(e)	0	0	0	0	0	0	[]	Transport
EX_arachd(e)	0	0	0	0	0	0	[]	Transport
EX_arg-L(e)	-0.02375	0	-0.011875	-0.02375	0	-0.011875	[]	Transport
EX_ascb-L(e)	0	0	0	0	0	0	[]	Transport
EX_asn-L(e)	0	0.0538255	0.0269128	0	0.0653749	0.0326875	[]	Transport
EX_asp-D(e)	0	0	0	0	0	0	[]	Transport
EX_asp-L(e)	0	0	0	0	0	0	[]	Transport
EX_atp(e)	0	0	0	0	0	0	[]	Transport
EX_avite1(e)	0	0	0	0	0	0	[]	Transport
EX_avite2(e)	0	0	0	0	0	0	[]	Transport
EX_bhb(e)	0	0.385144	0.192572	0	0.606681	0.303341	[]	Transport
EX_bildglcur(e)	0	0	0	0	0	0	[]	Transport
EX_bilglcur(e)	0	0	0	0	0	0	[]	Transport
EX_bilirub(e)	0	0	0	0	0	0	[]	Transport
EX_biocyt(e)	0	0	0	0	0	0	[]	Transport
EX_btn(e)	0	0	0	0	0	0	[]	Transport
EX_but(e)	0	0	0	0	0	0	[]	Transport
EX_bvite(e)	0	0	0	0	0	0	[]	Transport
EX_bz(e)	0	0	0	0	0	0	[]	Transport
EX_ca2(e)	0	0	0	0	0	0	[]	Transport
EX_camp(e)	0	0.0214326	0.0107163	0	0.02615	0.013075	[]	Transport
EX_cca_d3(e)	0	0	0	0	0	0	[]	Transport
EX_cgly(e)	0	0.00315047	0.00157524	0	0.00198766	0.000993832	[]	Transport
EX_chol(e)	0	0.0278626	0.0139313	0	0.0971346	0.0485673	[]	Transport
EX_cholate(e)	0	0	0	0	0	0	[]	Transport
EX_chsterol(e)	0	0.00540449	0.00270225	0	0.0188973	0.00944863	[]	Transport
EX_chtn(e)	0	0	0	0	0	0	[]	Transport
EX_cit(e)	0	0.18658	0.0932902	0	0.305698	0.152849	[]	Transport
EX_cl(e)	0	0	0	0	0	0	[]	Transport
EX_CLPND(e)	0	0	0	0	0	0	[]	Transport
EX_cmp(e)	0	0	0	0	0	0	[]	Transport
EX_co(e)	0	0	0	0	0	0	[]	Transport
EX_co2(e)	0	10.5076	5.25382	0	10.7324	5.36618	[]	Transport
EX_coumarin(e)	0	0	0	0	0	0	[]	Transport
EX_creat(e)	0	0.046052	0.023026	0	0.0559538	0.0279769	[]	Transport
EX_crmp_hs(e)	0	0.0549312	0.0274656	0	0.125192	0.0625962	[]	Transport
EX_crn(e)	0	0	0	0	0	0	[]	Transport
EX_crtsl(e)	0	0	0	0	0	0	[]	Transport
EX_crtstrn(e)	0	0	0	0	0	0	[]	Transport
EX_crvnc(e)	0	0	0	0	0	0	[]	Transport
EX_csn(e)	0	0	0	0	0	0	[]	Transport
EX_cspg_a(e)	0	0	0	0	0	0	[]	Transport
EX_cspg_b(e)	0	0	0	0	0	0	[]	Transport
EX_cspg_c(e)	0	0	0	0	0	0	[]	Transport
EX_cspg_d(e)	0	0	0	0	0	0	[]	Transport
EX_cspg_e(e)	0	0	0	0	0	0	[]	Transport
EX_cyan(e)	0	0	0	0	0	0	[]	Transport
EX_cys-L(e)	0	0.00315047	0.00157524	0	0.00198766	0.000993832	[]	Transport
EX_cytd(e)	0	0.035406	0.017703	0	0.0435833	0.0217916	[]	Transport
EX_dad-2(e)	0	0.0215302	0.0107651	0	0.02615	0.013075	[]	Transport
EX_dag_hs(e)	0	0.068517	0.0342585	0	0.126831	0.0634156	[]	Transport
EX_dcsptn1(e)	0	0	0	0	0	0	[]	Transport
EX_dcyt(e)	0	0.0356289	0.0178144	0	0.0435833	0.0217916	[]	Transport
EX_debrisoquine(e)	0	0	0	0	0	0	[]	Transport
EX_dgchol(e)	0	0	0	0	0	0	[]	Transport
EX_dgsn(e)	0	0.0215302	0.0107651	0	0.02615	0.013075	[]	Transport
EX_dhdascb(e)	0	0	0	0	0	0	[]	Transport
EX_dheas(e)	0	0	0	0	0	0	[]	Transport
EX_dhf(e)	0	0	0	0	0	0	[]	Transport
EX_digalsgalside_hs(e)	0	0	0	0	0	0	[]	Transport
EX_din(e)	0	0.0257746	0.0128873	0	0.0326875	0.0163437	[]	Transport
EX_dlnlcg(e)	0	0	0	0	0	0	[]	Transport
EX_dmhptcrn(e)	0	0	0	0	0	0	[]	Transport
EX_dopa(e)	0	0	0	0	0	0	[]	Transport
EX_dopasf(e)	0	0	0	0	0	0	[]	Transport
EX_drib(e)	0	0.0666697	0.0333349	0	0.248131	0.124065	[]	Transport
EX_duri(e)	0	0.036475	0.0182375	0	0.0653749	0.0326875	[]	Transport
EX_eaflatoxin(e)	0	0	0	0	0	0	[]	Transport
EX_ebastine(e)	0	0	0	0	0	0	[]	Transport
EX_ebastineoh(e)	0	0	0	0	0	0	[]	Transport
EX_eicostet(e)	0	0	0	0	0	0	[]	Transport
EX_elaid(e)	0	0.0894673	0.0447337	0	0.216082	0.108041	[]	Transport
EX_estradiol(e)	0	0	0	0	0	0	[]	Transport
EX_estradiolglc(e)	0	0	0	0	0	0	[]	Transport
EX_estriolglc(e)	0	0	0	0	0	0	[]	Transport
EX_estroneglc(e)	0	0	0	0	0	0	[]	Transport
EX_estrones(e)	0	0	0	0	0	0	[]	Transport
EX_etoh(e)	0	0	0	0	0	0	[]	Transport
EX_fe2(e)	0	0	0	0	0	0	[]	Transport
EX_fol(e)	0	0	0	0	0	0	[]	Transport
EX_for(e)	0	0.00603759	0.00301879	0	0.019085	0.00954248	[]	Transport
EX_fru(e)	0	0.115264	0.0576322	0	0.326734	0.163367	[]	Transport
EX_fuc-L(e)	0	0	0	0	0	0	[]	Transport
EX_fuc13galacglcgal14acglcgalgluside_hs(e)	0	0	0	0	0	0	[]	Transport
EX_fuc14galacglcgalgluside_hs(e)	0	0	0	0	0	0	[]	Transport
EX_fucacgalfucgalacglcgalgluside_hs(e)	0	0	0	0	0	0	[]	Transport
EX_fucacngal14acglcgalgluside_hs(e)	0	0	0	0	0	0	[]	Transport
EX_fucacngalacglcgalgluside_hs(e)	0	0	0	0	0	0	[]	Transport
EX_fucfuc12gal14acglcgalgluside_hs(e)	0	0	0	0	0	0	[]	Transport
EX_fucfuc132galacglcgal14acglcgalgluside_hs(e)	0	0	0	0	0	0	[]	Transport
EX_fucfucfucgalacglc13galacglcgal14acglcgalgluside_hs(e)	0	0	0	0	0	0	[]	Transport
EX_fucfucfucgalacglcgal14acglcgalgluside_hs(e)	0	0	0	0	0	0	[]	Transport
EX_fucfucgalacglcgalgluside_hs(e)	0	0	0	0	0	0	[]	Transport
EX_fucgal14acglcgalgluside_hs(e)	0	0	0	0	0	0	[]	Transport
EX_fucgalfucgalacglcgalgluside_hs(e)	0	0	0	0	0	0	[]	Transport
EX_fucgalgbside_hs(e)	0	0	0	0	0	0	[]	Transport
EX_gal(e)	0	0.0603202	0.0301601	0	0.224318	0.112159	[]	Transport
EX_galacglcgalgbside_hs(e)	0	0	0	0	0	0	[]	Transport
EX_galfuc12gal14acglcgalgluside_hs(e)	0	0	0	0	0	0	[]	Transport
EX_galfucgalacglcgal14acglcgalgluside_hs(e)	0	0	0	0	0	0	[]	Transport
EX_galgalfucfucgalacglcgalacglcgal14acglcgalgluside_hs(e)	0	0	0	0	0	0	[]	Transport
EX_galgalgalthcrm_hs(e)	0	0	0	0	0	0	[]	Transport
EX_gam(e)	0	0	0	0	0	0	[]	Transport
EX_gbside_hs(e)	0	0	0	0	0	0	[]	Transport
EX_gchola(e)	0	0	0	0	0	0	[]	Transport
EX_gd1b2_hs(e)	0	0	0	0	0	0	[]	Transport
EX_gd1c_hs(e)	0	0	0	0	0	0	[]	Transport
EX_gdchola(e)	0	0	0	0	0	0	[]	Transport
EX_gdp(e)	0	0	0	0	0	0	[]	Transport
EX_glc(e)	-0.2718	-0.156536	-0.214168	-0.2718	0.0549344	-0.108433	[]	Transport
EX_gln-L(e)	-0.0765	-0.0226745	-0.0495872	-0.0765	-0.0111251	-0.0438125	[]	Transport
EX_glu-L(e)	0	0.107651	0.0538255	0	0.13075	0.0653749	[]	Transport
EX_gluala(e)	0	0.0538255	0.0269128	0	0.0653749	0.0326875	[]	Transport
EX_gly(e)	0	0.107651	0.0538255	0	0.13075	0.0653749	[]	Transport
EX_glyb(e)	0	0.0262582	0.0131291	0	0.0904235	0.0452118	[]	Transport
EX_glyc-S(e)	0	0	0	0	0	0	[]	Transport
EX_glyc(e)	0	0.239086	0.119543	0	0.679917	0.339958	[]	Transport
EX_glygn2(e)	0	0	0	0	0	0	[]	Transport
EX_glygn4(e)	0	0	0	0	0	0	[]	Transport
EX_glygn5(e)	0	0	0	0	0	0	[]	Transport
EX_gmp(e)	0	0	0	0	0	0	[]	Transport
EX_gp1c_hs(e)	0	0	0	0	0	0	[]	Transport
EX_gp1calpha_hs(e)	0	0	0	0	0	0	[]	Transport
EX_gq1b_hs(e)	0	0	0	0	0	0	[]	Transport
EX_gq1balpha_hs(e)	0	0	0	0	0	0	[]	Transport
EX_gsn(e)	0	0.0215302	0.0107651	0	0.02615	0.013075	[]	Transport
EX_gt1a_hs(e)	0	0	0	0	0	0	[]	Transport
EX_gthox(e)	0	0	0	0	0	0	[]	Transport
EX_gthrd(e)	0	0	0	0	0	0	[]	Transport
EX_gtp(e)	0	0	0	0	0	0	[]	Transport
EX_gua(e)	0	0.0215302	0.0107651	0	0.02615	0.013075	[]	Transport
EX_h(e)	-10.204	0.52789	-4.83807	-10.4412	1.37147	-4.53488	[]	Transport
EX_h2o(e)	-0.231042	10.6925	5.23074	-0.0187669	11.1278	5.5545	[]	Transport
EX_h2o2(e)	0	0.153457	0.0767285	0	0.45754	0.22877	[]	Transport
EX_ha_pre1(e)	0	0.032142	0.016071	0	0.109196	0.0545979	[]	Transport
EX_ha(e)	0	0.016071	0.00803549	0	0.0545979	0.0272989	[]	Transport
EX_hco3(e)	-10	0.507632	-4.74618	-10	0.732359	-4.63382	[]	Transport
EX_hcoumarin(e)	0	0	0	0	0	0	[]	Transport
EX_hdca(e)	0	0.0549312	0.0274656	0	0.152698	0.076349	[]	Transport
EX_hdcea(e)	0	0.0925288	0.0462644	0	0.244084	0.122042	[]	Transport
EX_hestratriol(e)	0	0	0	0	0	0	[]	Transport
EX_hexc(e)	0	0	0	0	0	0	[]	Transport
EX_his-L(e)	-0.01	-0.00415361	-0.0070768	-0.01	-0.00267386	-0.00633693	[]	Transport
EX_hista(e)	0	0.00584639	0.0029232	0	0.00732614	0.00366307	[]	Transport
EX_hom-L(e)	0	0	0	0	0	0	[]	Transport
EX_hpdca(e)	0	0	0	0	0	0	[]	Transport
EX_hspg(e)	0	0	0	0	0	0	[]	Transport
EX_hxan(e)	0	0.0269128	0.0134564	0	0.0326875	0.0163437	[]	Transport
EX_i(e)	0	0	0	0	0	0	[]	Transport
EX_idp(e)	0	0	0	0	0	0	[]	Transport
EX_ile-L(e)	-0.00700627	-0.00700627	-0.00700627	-0.00720817	-0.00720817	-0.00720817	[]	Transport
EX_imp(e)	0	0	0	0	0	0	[]	Transport
EX_inost(e)	0	0.0897623	0.0448812	0	0.305997	0.152998	[]	Transport
EX_ins(e)	0	0.0269128	0.0134564	0	0.0326875	0.0163437	[]	Transport
EX_k(e)	0	0	0	0	0	0	[]	Transport
EX_ksi_deg1(e)	0	0	0	0	0	0	[]	Transport
EX_ksi(e)	0	0	0	0	0	0	[]	Transport
EX_ksii_core2(e)	0	0	0	0	0	0	[]	Transport
EX_ksii_core4(e)	0	0	0	0	0	0	[]	Transport
EX_lac-D(e)	0	0.144324	0.0721619	0	0.535667	0.267834	[]	Transport
EX_lac-L(e)	0	0.332296	0.166148	0	0.778358	0.389179	[]	Transport
EX_lcts(e)	0	0.0400028	0.0200014	0	0.143554	0.071777	[]	Transport
EX_Lcystin(e)	0	0	0	0	0	0	[]	Transport
EX_leu-L(e)	-0.0362216	-0.015674	-0.0259478	-0.0362216	-0.00976484	-0.0229932	[]	Transport
EX_leuktrA4(e)	0	0	0	0	0	0	[]	Transport
EX_leuktrB4(e)	0	0	0	0	0	0	[]	Transport
EX_leuktrC4(e)	0	0	0	0	0	0	[]	Transport
EX_leuktrD4(e)	0	0	0	0	0	0	[]	Transport
EX_leuktrE4(e)	0	0	0	0	0	0	[]	Transport
EX_leuktrF4(e)	0	0	0	0	0	0	[]	Transport
EX_lgnc(e)	0	0	0	0	0	0	[]	Transport
EX_lipoate(e)	0	0	0	0	0	0	[]	Transport
EX_lneldc(e)	0	0.0540587	0.0270293	0	0.150964	0.0754818	[]	Transport
EX_lnlc(e)	0	0	0	0	0	0	[]	Transport
EX_lnlnca(e)	0	0	0	0	0	0	[]	Transport
EX_lnlncg(e)	0	0	0	0	0	0	[]	Transport
EX_lpchol_hs(e)	0	0.0190994	0.0095497	0	0.0664015	0.0332008	[]	Transport
EX_lys-L(e)	-0.00949843	-0.00949843	-0.00949843	-0.00734387	-0.00734387	-0.00734387	[]	Transport
EX_mag_hs(e)	0	0.10887	0.0544348	0	0.247839	0.12392	[]	Transport
EX_malt(e)	0	0	0	0	0	0	[]	Transport
EX_man(e)	0	0.0581485	0.0290742	0	0.216416	0.108208	[]	Transport
EX_meoh(e)	0	0.00605264	0.00302632	0	0.0191578	0.00957889	[]	Transport
EX_mepi(e)	0	0	0	0	0	0	[]	Transport
EX_mercplaccys(e)	0	0.00157524	0.000787618	0	0.000993832	0.000496916	[]	Transport
EX_met-L(e)	-0.01	-0.00684953	-0.00842476	-0.01	-0.00801234	-0.00900617	[]	Transport
EX_mthgxl(e)	0	0.144324	0.0721619	0	0.535667	0.267834	[]	Transport
EX_n2m2nmasn(e)	0	0	0	0	0	0	[]	Transport
EX_na1(e)	0	0	0	0	0	0	[]	Transport
EX_nac(e)	0	0	0	0	0	0	[]	Transport
EX_nad(e)	0	0	0	0	0	0	[]	Transport
EX_nadp(e)	0	0	0	0	0	0	[]	Transport
EX_ncam(e)	0	0	0	0	0	0	[]	Transport
EX_nh4(e)	0	0.107651	0.0538255	0	0.13075	0.0653749	[]	Transport
EX_no(e)	0	0.0347789	0.0173894	0	0.117355	0.0586775	[]	Transport
EX_npthl(e)	0	0	0	0	0	0	[]	Transport
EX_nrpphr(e)	0	0	0	0	0	0	[]	Transport
EX_nrpphrsf(e)	0	0	0	0	0	0	[]	Transport
EX_nrvnc(e)	0	0	0	0	0	0	[]	Transport
EX_o2(e)	-0.3066	-0.219412	-0.263006	-0.3066	-0.0242288	-0.165414	[]	Transport
EX_o2s(e)	0	0.102305	0.0511523	0	0.305026	0.152513	[]	Transport
EX_oagd3_hs(e)	0	0	0	0	0	0	[]	Transport
EX_oagt3_hs(e)	0	0	0	0	0	0	[]	Transport
EX_ocdca(e)	-0.0949483	-0.00012787	-0.0475381	-0.1	0	-0.05	[]	Transport
EX_ocdcea(e)	-0.0192	-0.000104017	-0.00965201	-0.0192	0	-0.0096	[]	Transport
EX_octa(e)	0	0	0	0	0	0	[]	Transport
EX_oh1	0	0	0	0	0	0	[]	Transport
EX_onpthl(e)	0	0	0	0	0	0	[]	Transport
EX_orn(e)	0	0	0	0	0	0	[]	Transport
EX_oxa(e)	0	0	0	0	0	0	[]	Transport
EX_paf_hs(e)	0	0	0	0	0	0	[]	Transport
EX_pchol_hs(e)	0	0.0165974	0.00829872	0	0.0570051	0.0285025	[]	Transport
EX_pe_hs(e)	0	0.0344693	0.0172347	0	0.109117	0.0545585	[]	Transport
EX_peplys(e)	0	0	0	0	0	0	[]	Transport
EX_pglyc_hs(e)	0	0.0342585	0.0171292	0	0.109486	0.0547431	[]	Transport
EX_phe-L(e)	-0.01	-0.01	-0.01	-0.01	-0.00565305	-0.00782652	[]	Transport
EX_pheme(e)	0	0	0	0	0	0	[]	Transport
EX_phyQ(e)	0	0	0	0	0	0	[]	Transport
EX_phyt(e)	0	0	0	0	0	0	[]	Transport
EX_pi(e)	-0.0997602	-0.00913814	-0.0544492	-0.261239	-0.0165382	-0.138889	[]	Transport
EX_pnto-R(e)	0	0	0	0	0	0	[]	Transport
EX_ppa(e)	0	0	0	0	0	0	[]	Transport
EX_prgstrn(e)	0	0	0	0	0	0	[]	Transport
EX_pro-D(e)	0	0	0	0	0	0	[]	Transport
EX_pro-L(e)	0	0.107651	0.0538255	0	0.13075	0.0653749	[]	Transport
EX_prostgd2(e)	0	0	0	0	0	0	[]	Transport
EX_prostge1(e)	0	0	0	0	0	0	[]	Transport
EX_prostge2(e)	0	0	0	0	0	0	[]	Transport
EX_prostgf2(e)	0	0	0	0	0	0	[]	Transport
EX_ps_hs(e)	0	0.0374667	0.0187333	0	0.113422	0.0567111	[]	Transport
EX_ptdca(e)	0	0	0	0	0	0	[]	Transport
EX_pydam(e)	0	0	0	0	0	0	[]	Transport
EX_pydx(e)	0	0	0	0	0	0	[]	Transport
EX_pydxn(e)	0	0	0	0	0	0	[]	Transport
EX_pyr(e)	-0.0568	0.268217	0.105709	-0.0568	0.60222	0.27271	[]	Transport
EX_retfa(e)	0	0	0	0	0	0	[]	Transport
EX_retinol-9-cis(e)	0	0	0	0	0	0	[]	Transport
EX_retinol-cis-11(e)	0	0	0	0	0	0	[]	Transport
EX_retinol(e)	0	0	0	0	0	0	[]	Transport
EX_retn(e)	0	0	0	0	0	0	[]	Transport
EX_retnglc(e)	0	0	0	0	0	0	[]	Transport
EX_rib-D(e)	0	0	0	0	0	0	[]	Transport
EX_ribflv(e)	0	0	0	0	0	0	[]	Transport
EX_Rtotal(e)	0	0.170022	0.0850109	0	0.259357	0.129678	[]	Transport
EX_Rtotal2(e)	0	0.170022	0.0850109	0	0.259357	0.129678	[]	Transport
EX_Rtotal3(e)	0	0.170022	0.0850109	0	0.259357	0.129678	[]	Transport
EX_s2l2fn2m2masn(e)	0	0	0	0	0	0	[]	Transport
EX_s2l2n2m2masn(e)	0	0	0	0	0	0	[]	Transport
EX_sarcs(e)	0	0	0	0	0	0	[]	Transport
EX_sel(e)	0	0	0	0	0	0	[]	Transport
EX_ser-D(e)	0	0	0	0	0	0	[]	Transport
EX_ser-L(e)	0	0.107651	0.0538255	0	0.13075	0.0653749	[]	Transport
EX_sl-L(e)	0	0	0	0	0	0	[]	Transport
EX_so4(e)	0	0	0	-0.00434695	0	-0.00217348	[]	Transport
EX_spc_hs(e)	0	0.0187791	0.00938953	0	0.0637175	0.0318587	[]	Transport
EX_sph1p(e)	0	0.0818498	0.0409249	0	0.13075	0.0653749	[]	Transport
EX_sphs1p(e)	0	0.0549312	0.0274656	0	0.13075	0.0653749	[]	Transport
EX_srtn(e)	0	0.00811912	0.00405956	0	0.00772244	0.00386122	[]	Transport
EX_strch1(e)	0	0	0	0	0	0	[]	Transport
EX_strch2(e)	0	0	0	0	0	0	[]	Transport
EX_strdnc(e)	0	0	0	0	0	0	[]	Transport
EX_succ(e)	0	0.284384	0.142192	0	0.305698	0.152849	[]	Transport
EX_tag_hs(e)	0	0.0491037	0.0245519	0	0.0851775	0.0425888	[]	Transport
EX_tagat-D(e)	0	0	0	0	0	0	[]	Transport
EX_taur(e)	0	0.00315047	0.00157524	0	0.00198766	0.000993832	[]	Transport
EX_tchola(e)	0	0	0	0	0	0	[]	Transport
EX_tcynt(e)	0	0	0	0	0	0	[]	Transport
EX_tdchola(e)	0	0	0	0	0	0	[]	Transport
EX_tethex3(e)	0	0	0	0	0	0	[]	Transport
EX_tetpent3(e)	0	0	0	0	0	0	[]	Transport
EX_tetpent6(e)	0	0	0	0	0	0	[]	Transport
EX_tettet6(e)	0	0	0	0	0	0	[]	Transport
EX_thf(e)	0	0	0	0	0	0	[]	Transport
EX_thm(e)	0	0	0	0	0	0	[]	Transport
EX_thmmp(e)	0	0	0	0	0	0	[]	Transport
EX_thmtp(e)	0	0	0	0	0	0	[]	Transport
EX_thr-L(e)	-0.01	-0.00819749	-0.00909875	-0.01	-0.01	-0.01	[]	Transport
EX_thym(e)	0	0.0481991	0.0240995	0	0.0653749	0.0326875	[]	Transport
EX_thymd(e)	0	0	0	0	0	0	[]	Transport
EX_thyox-L(e)	0	0	0	0	0	0	[]	Transport
EX_tmndnc(e)	0	0	0	0	0	0	[]	Transport
EX_tre(e)	0	0	0	0	0	0	[]	Transport
EX_triodthy(e)	0	0	0	0	0	0	[]	Transport
EX_triodthysuf(e)	0	0	0	0	0	0	[]	Transport
EX_trp-L(e)	-0.01	-0.00188088	-0.00594044	-0.01	-0.00227756	-0.00613878	[]	Transport
EX_tststerone(e)	0	0	0	0	0	0	[]	Transport
EX_tststeroneglc(e)	0	0	0	0	0	0	[]	Transport
EX_tsul(e)	0	0	0	0	0	0	[]	Transport
EX_ttdca(e)	-0.1	-3.67582e-05	-0.0500184	-0.1	0	-0.05	[]	Transport
EX_txa2(e)	0	0	0	0	0	0	[]	Transport
EX_tymsf(e)	0	0	0	0	0.00434695	0.00217348	[]	Transport
EX_Tyr-ggn(e)	0	0	0	0	0	0	[]	Transport
EX_tyr-L(e)	0	0	0	0	0.00434695	0.00217348	[]	Transport
EX_udp(e)	0	0	0	0	0	0	[]	Transport
EX_ump(e)	0	0	0	0	0	0	[]	Transport
EX_ura(e)	0	0.053784	0.026892	0	0.0653749	0.0326875	[]	Transport
EX_urate(e)	0	0	0	0	0	0	[]	Transport
EX_urea(e)	0	0.0687824	0.0343912	0	0.0831781	0.0415891	[]	Transport
EX_uri(e)	0	0.0405508	0.0202754	0	0.0653749	0.0326875	[]	Transport
EX_utp(e)	0	0	0	0	0	0	[]	Transport
EX_vacc(e)	0	0.0894673	0.0447337	0	0.216082	0.108041	[]	Transport
EX_val-L(e)	-0.01	-0.00937304	-0.00968652	-0.01	-0.00720586	-0.00860293	[]	Transport
EX_vitd2(e)	0	0	0	0	0	0	[]	Transport
EX_vitd3(e)	0	0.0054876	0.0027438	0	0.0191578	0.00957889	[]	Transport
EX_xolest_hs(e)	0	0.0053465	0.00267325	0	0.0186954	0.00934772	[]	Transport
EX_xoltri24(e)	0	0	0	0	0	0	[]	Transport
EX_xoltri25(e)	0	0	0	0	0	0	[]	Transport
EX_xoltri27(e)	0	0.00488102	0.00244051	0	0.0171351	0.00856754	[]	Transport
EX_xylt(e)	0	0.071116	0.035558	0	0.263824	0.131912	[]	Transport
EX_yvite(e)	0	0	0	0	0	0	[]	Transport
F1Atg	0	0	0	0	0	0	[]	Transport
F1PGT	0	0	0	0	0	0	Transport, Golgi Apparatus	Transport
F6Tg	0	0	0	0	0	0	Fructose and Mannose Metabolism	Glycosylation
FACOAL140i	0	0.0999632	0.0499816	0	0.1	0.05	N-Glycan Biosynthesis	Glycosylation
FACOAL150	0	0	0	0	0	0	Fatty acid activation	FAS
FACOAL160i	0	0.0531382	0.0265691	0	0.149342	0.074671	Fatty acid activation	FAS
FACOAL161	-0.0925618	-3.29962e-05	-0.0462974	-0.244084	0	-0.122042	Fatty acid activation	FAS
FACOAL170	0	0	0	0	0	0	Fatty acid activation	FAS
FACOAL180i	0	0.0948204	0.0474102	0	0.1	0.05	Fatty acid activation	FAS
FACOAL1812	-0.0894673	0	-0.0447337	-0.216082	0	-0.108041	Fatty acid activation	FAS
FACOAL1813	-0.0894673	0	-0.0447337	-0.216082	0	-0.108041	Fatty acid activation	FAS
FACOAL181i	0	0.019096	0.00954799	0	0.0192	0.0096	Fatty acid activation	FAS
FACOAL1821	0	0	0	0	0	0	Fatty acid activation	FAS
FACOAL1822	-0.0540587	0	-0.0270293	-0.150964	0	-0.0754818	Fatty acid activation	FAS
FACOAL1831	0	0	0	0	0	0	Fatty acid activation	FAS
FACOAL1832	0	0	0	0	0	0	Fatty acid activation	FAS
FACOAL184	0	0	0	0	0	0	Fatty acid activation	FAS
FACOAL191	0	0.164396	0.0821981	0	0.585145	0.292573	Fatty acid activation	FAS
FACOAL200	0	0	0	0	0	0	Fatty acid activation	FAS
FACOAL203	0	0	0	0	0	0	Fatty acid activation	FAS
FACOAL204	0	0	0	0	0	0	Fatty acid activation	FAS
FACOAL2042	0	0	0	0	0	0	Fatty acid activation	FAS
FACOAL204i	0	0	0	0	0	0	Fatty acid activation	FAS
FACOAL205	0	0	0	0	0	0	Fatty acid activation	FAS
FACOAL206	0	0	0	0	0	0	Fatty acid activation	FAS
FACOAL224	0	0	0	0	0	0	Fatty acid activation	FAS
FACOAL2251	0	0	0	0	0	0	Fatty acid activation	FAS
FACOAL2252	0	0	0	0	0	0	Fatty acid activation	FAS
FACOAL226	0	0	0	0	0	0	Fatty acid activation	FAS
FACOAL226i	0	0	0	0	0	0	Fatty acid activation	FAS
FACOAL240	0	0	0	0	0	0	Fatty acid activation	FAS
FACOAL241	0	0	0	0	0	0	Fatty acid activation	FAS
FACOAL244_1	0	0	0	0	0	0	Fatty acid activation	FAS
FACOAL245_1	0	0	0	0	0	0	Fatty acid activation	FAS
FACOAL245_2	0	0	0	0	0	0	Fatty acid activation	FAS
FACOAL246_1	0	0	0	0	0	0	Fatty acid activation	FAS
FACOAL260	0	0	0	0	0	0	Fatty acid activation	FAS
FACOAL80i	0	0	0	0	0	0	Fatty acid activation	FAS
FADH2tru	0.000565042	0.00605264	0.00330884	0	0.0191578	0.00957889	Fatty acid activation	FAS
FADH2tx	0	0	0	0	0	0	Transport, Endoplasmic Reticular	Transport
FADtru	0.000565042	0.00605264	0.00330884	0	0.0191578	0.00957889	Transport, Peroxisomal	Transport
FADtx	0	0	0	0	0	0	Transport, Endoplasmic Reticular	Transport
FALDH	-0.00605264	0	-0.00302632	-0.0191578	0	-0.00957889	Transport, Peroxisomal	Transport
FALDtly	0	0.159093	0.0795466	0	0.45754	0.22877	Tyrosine metabolism	Amino Acids
FALDtm	0	0	0	0	0	0	Transport, Lysosomal	Transport
FAOXC11	0	0	0	0	0	0	Transport, Mitochondrial	Transport
FAOXC140	0	0.0399866	0.0199933	0	0.0399866	0.0199933	Fatty acid oxidation	UFAS
FAOXC150m	0	0	0	0	0	0	Fatty acid oxidation	UFAS
FAOXC160	0	0.0740729	0.0370364	0	0.131984	0.0659921	Fatty acid oxidation	UFAS
FAOXC16080m	0	0.0740729	0.0370364	0	0.131984	0.0659921	Fatty acid oxidation	UFAS
FAOXC16080x	0	0	0	0	0	0	Fatty acid oxidation	UFAS
FAOXC161802m	0	0.0399866	0.0199933	0	0.0399866	0.0199933	Fatty acid oxidation, peroxisome	UFAS
FAOXC16180m	0	0.0399866	0.0199933	0	0.0399866	0.0199933	Fatty acid activation	FAS
FAOXC170m	0	0	0	0	0	0	Fatty acid oxidation	UFAS
FAOXC180	0	0.0644223	0.0322111	0	0.115486	0.0577431	Fatty acid oxidation	UFAS
FAOXC180x	0	0	0	0	0	0	Fatty acid oxidation	UFAS
FAOXC1811601m	0	0.0399866	0.0199933	0	0.0399866	0.0199933	Fatty acid oxidation, peroxisome	UFAS
FAOXC1811602m	0	0.0399866	0.0199933	0	0.0399866	0.0199933	Fatty acid oxidation	UFAS
FAOXC1811603m	0	0.0526093	0.0263047	0	0.104788	0.0523938	Fatty acid oxidation	UFAS
FAOXC182806m	0	0	0	0	0	0	Fatty acid oxidation	UFAS
FAOXC18280m	0	0.0399866	0.0199933	0	0.0399866	0.0199933	Fatty acid oxidation	UFAS
FAOXC183803m	0	0	0	0	0	0	Fatty acid oxidation	UFAS
FAOXC183806m	0	0	0	0	0	0	Fatty acid oxidation	UFAS
FAOXC183806x	0	0	0	0	0	0	Fatty acid oxidation	UFAS
FAOXC18480m	0	0	0	0	0	0	Fatty acid oxidation, peroxisome	UFAS
FAOXC18480x	0	0	0	0	0	0	Fatty acid oxidation	UFAS
FAOXC200180m	0	0	0	0	0	0	Fatty acid oxidation, peroxisome	UFAS
FAOXC200180x	0	0	0	0	0	0	Fatty acid oxidation	UFAS
FAOXC2031836m	0	0	0	0	0	0	Fatty acid oxidation, peroxisome	UFAS
FAOXC204	0	0	0	0	0	0	Fatty acid oxidation	UFAS
FAOXC204184m	0	0	0	0	0	0	Fatty acid oxidation	UFAS
FAOXC2051843m	0	0	0	0	0	0	Fatty acid oxidation	UFAS
FAOXC2051843x	0	0	0	0	0	0	Fatty acid oxidation	UFAS
FAOXC2242046m	0	0	0	0	0	0	Fatty acid oxidation, peroxisome	UFAS
FAOXC2242046x	0	0	0	0	0	0	Fatty acid oxidation	UFAS
FAOXC2251836m	0	0	0	0	0	0	Fatty acid oxidation, peroxisome	UFAS
FAOXC2251836x	0	0	0	0	0	0	Fatty acid oxidation	UFAS
FAOXC2252053m	0	0	0	0	0	0	Fatty acid oxidation, peroxisome	UFAS
FAOXC2252053x	0	0	0	0	0	0	Fatty acid oxidation	UFAS
FAOXC226	0	0	0	0	0	0	Fatty acid oxidation, peroxisome	UFAS
FAOXC226205m	0	0	0	0	0	0	Fatty acid oxidation	UFAS
FAOXC226205x	0	0	0	0	0	0	Fatty acid oxidation	UFAS
FAOXC240200x	0	0	0	0	0	0	Fatty acid oxidation, peroxisome	UFAS
FAOXC241181x	0	0	0	0	0	0	Fatty acid oxidation, peroxisome	UFAS
FAOXC2442246x	0	0	0	0	0	0	Fatty acid oxidation, peroxisome	UFAS
FAOXC2452253x	0	0	0	0	0	0	Fatty acid oxidation, peroxisome	UFAS
FAOXC2452256x	0	0	0	0	0	0	Fatty acid oxidation, peroxisome	UFAS
FAOXC246226x	0	0	0	0	0	0	Fatty acid oxidation, peroxisome	UFAS
FAOXC260240x	0	0	0	0	0	0	Fatty acid oxidation, peroxisome	UFAS
FAOXC80	0	0.0740729	0.0370364	0	0.201145	0.100572	Fatty acid oxidation, peroxisome	UFAS
FAS100COA	0	0.0264415	0.0132207	0	0.0865008	0.0432504	Fatty acid oxidation	UFAS
FAS120COA	0	0.0264415	0.0132207	0	0.0865008	0.0432504	Fatty acid elongation	FAS
FAS140COA	0	0.0264415	0.0132207	0	0.0865008	0.0432504	Fatty acid elongation	FAS
FAS160COA	0	0.0861442	0.0430721	0	0.153307	0.0766537	Fatty acid elongation	FAS
FAS180COA	0	0.0996358	0.0498179	0	0.255314	0.127657	Fatty acid elongation	FAS
FAS80COA_L	0	0.049817	0.0249085	0	0.177317	0.0886584	Fatty acid elongation	FAS
FATP1t	0	0	0	0	0	0	Fatty acid elongation	FAS
FATP2t	0	0	0	0	0	0	Transport, Extracellular	Transport
FATP3t	-0.00012787	-0.00012787	-0.00012787	0	0	0	Transport, Extracellular	Transport
FATP4t	0	0	0	0	0	0	Transport, Extracellular	Transport
FATP5t	0	0	0	0	0	0	Transport, Extracellular	Transport
FATP6t	0	0	0	0	0	0	Transport, Extracellular	Transport
FATP7t	0	0	0	0	0	0	Transport, Extracellular	Transport
FATP8t	0	0	0	0	0	0	Transport, Extracellular	Transport
FATP9t	0	0	0	0	0	0	Transport, Extracellular	Transport
FBA	-0.245128	0.110336	-0.0673961	-0.590657	0.260777	-0.16494	Transport, Extracellular	Transport
FBA2	0	0.355464	0.177732	0	0.851434	0.425717	Glycolysis/Gluconeogenesis	Central Metabolism
FBA4	0	0	0	0	0	0	Fructose and Mannose Metabolism	Glycosylation
FBP	0	0.328792	0.164396	0	1.11466	0.557328	Glyoxylate and Dicarboxylate Metabolism	Central Metabolism
FBP26	0	0.328792	0.164396	0	1.17029	0.585145	Glycolysis/Gluconeogenesis	Central Metabolism
FCLTm	0	0	0	0	0	0	Fructose and Mannose Metabolism	Glycosylation
FE2t	0	0	0	0	0	0	Heme Biosynthesis	Heme
FE2tm	0	0	0	0	0	0	Transport, Extracellular	Transport
FK	0	0	0	0	0	0	Transport, Mitochondrial	Transport
FMNAT	0	0	0	0	0	0	Fructose and Mannose Metabolism	Glycosylation
FOLR2	0	0	0	0	0	0	Riboflavin Metabolism	Vitamins
FOLt2	0	0	0	0	0	0	Folate Metabolism	Vitamins
FORt2m	-0.00597075	0	-0.00298538	-0.0188721	0	-0.00943603	Transport, Extracellular	Transport
FORtr	-0.00605264	-0.000565042	-0.00330884	-0.0191578	0	-0.00957889	Transport, Mitochondrial	Transport
FORtrn	0	0	0	0	0	0	Transport, Endoplasmic Reticular	Transport
FPGS	0	0.0821981	0.0410991	0	0.292573	0.146286	Transport, Nuclear	Transport
FPGS2	0	0.0657585	0.0328792	0	0.234058	0.117029	Folate Metabolism	Vitamins
FPGS2m	0	0.0657585	0.0328792	0	0.234058	0.117029	Folate Metabolism	Vitamins
FPGS3	0	0.0547987	0.0273994	0	0.195048	0.0975242	Folate Metabolism	Vitamins
FPGS3m	0	0.0547987	0.0273994	0	0.195048	0.0975242	Folate Metabolism	Vitamins
FPGS4	0	0.0821981	0.0410991	0	0.292573	0.146286	Folate Metabolism	Vitamins
FPGS4m	0	0.0657585	0.0328792	0	0.234058	0.117029	Folate Metabolism	Vitamins
FPGS5	0	0.0657585	0.0328792	0	0.234058	0.117029	Folate Metabolism	Vitamins
FPGS5m	0	0.0657585	0.0328792	0	0.234058	0.117029	Folate Metabolism	Vitamins
FPGS6	0	0.0547987	0.0273994	0	0.195048	0.0975242	Folate Metabolism	Vitamins
FPGS6m	0	0.0547987	0.0273994	0	0.195048	0.0975242	Folate Metabolism	Vitamins
FPGS7	0	0.0821981	0.0410991	0	0.292573	0.146286	Folate Metabolism	Vitamins
FPGS7m	0	0.0821981	0.0410991	0	0.292573	0.146286	Folate Metabolism	Vitamins
FPGS8	0	0.0657585	0.0328792	0	0.234058	0.117029	Folate Metabolism	Vitamins
FPGS8m	0	0.0657585	0.0328792	0	0.234058	0.117029	Folate Metabolism	Vitamins
FPGS9	0	0.0547987	0.0273994	0	0.195048	0.0975242	Folate Metabolism	Vitamins
FPGS9m	0	0.0547987	0.0273994	0	0.195048	0.0975242	Folate Metabolism	Vitamins
FPGSm	0	0.0821981	0.0410991	0	0.292573	0.146286	Folate Metabolism	Vitamins
FRDPtc	0	0	0	0	0	0	Folate Metabolism	Vitamins
FRDPtr	0.00113008	0.0121053	0.00661769	0	0.0383156	0.0191578	Transport, Peroxisomal	Transport
FRTT	0	0	0	0	0	0	Transport, Peroxisomal	Transport
FRUt1r	0	0	0	0	0	0	Cholesterol Metabolism	Steriods
FRUt4	0	0	0	0	0	0	Transport, Extracellular	Transport
FT	0	0	0	0	0	0	Transport, Extracellular	Transport
FTCD	0	0.00584639	0.0029232	0	0.00732614	0.00366307	N-Glycan Biosynthesis	Glycosylation
FTHFCL	0	0	0	0	0	0	Folate Metabolism	Vitamins
FTHFDH	0	0.270913	0.135456	0	0.439277	0.219638	Folate Metabolism	Vitamins
FTHFL	0	0.00593184	0.00296592	0	0.0187561	0.00937803	Folate Metabolism	Vitamins
FTHFLm	0	0.00597075	0.00298538	0	0.0188721	0.00943603	Folate Metabolism	Vitamins
FUC13GALACGLCGAL14ACGLCGALGLUSIDEte	0	0	0	0	0	0	Folate Metabolism	Vitamins
FUC13GALACGLCGAL14ACGLCGALGLUSIDEtg	0	0	0	0	0	0	Transport, Extracellular	Transport
FUC14GALACGLCGALGLUSIDEte	0	0	0	0	0	0	Transport, Golgi Apparatus	Transport
FUC14GALACGLCGALGLUSIDEtg	0	0	0	0	0	0	Transport, Extracellular	Transport
FUCACGALFUCGALACGLCGALGLUSIDEte	0	0	0	0	0	0	Transport, Golgi Apparatus	Transport
FUCACGALFUCGALACGLCGALGLUSIDEtg	0	0	0	0	0	0	Transport, Extracellular	Transport
FUCACNGAL14ACGLCGALGLUSIDEte	0	0	0	0	0	0	Transport, Golgi Apparatus	Transport
FUCACNGAL14ACGLCGALGLUSIDEtg	0	0	0	0	0	0	Transport, Extracellular	Transport
FUCACNGALACGLCGALGLUSIDEte	0	0	0	0	0	0	Transport, Golgi Apparatus	Transport
FUCACNGALACGLCGALGLUSIDEtg	0	0	0	0	0	0	Transport, Extracellular	Transport
FUCASE2e	0	0	0	0	0	0	Transport, Golgi Apparatus	Transport
FUCASE2ly	0	0	0	0	0	0	Keratan sulfate degradation	Glycosylation
FUCASEe	0	0	0	0	0	0	Keratan sulfate degradation	Glycosylation
FUCASEly	0	0	0	0	0	0	N-Glycan Degradation	Glycosylation
FUCFUC12GAL14ACGLCGALGLUSIDEte	0	0	0	0	0	0	N-Glycan Degradation	Glycosylation
FUCFUC12GAL14ACGLCGALGLUSIDEtg	0	0	0	0	0	0	Transport, Extracellular	Transport
FUCFUC132GALACGLCGAL14ACGLCGALGLUSIDEte	0	0	0	0	0	0	Transport, Golgi Apparatus	Transport
FUCFUC132GALACGLCGAL14ACGLCGALGLUSIDEtg	0	0	0	0	0	0	Transport, Extracellular	Transport
FUCFUCFUCGALACGLC13GALACGLCGAL14ACGLCGALGLUSIDEte	0	0	0	0	0	0	Transport, Golgi Apparatus	Transport
FUCFUCFUCGALACGLC13GALACGLCGAL14ACGLCGALGLUSIDEtg	0	0	0	0	0	0	Transport, Extracellular	Transport
FUCFUCFUCGALACGLCGAL14ACGLCGALGLUSIDEte	0	0	0	0	0	0	Transport, Golgi Apparatus	Transport
FUCFUCFUCGALACGLCGAL14ACGLCGALGLUSIDEtg	0	0	0	0	0	0	Transport, Extracellular	Transport
FUCFUCGALACGLCGALGLUSIDEte	0	0	0	0	0	0	Transport, Golgi Apparatus	Transport
FUCFUCGALACGLCGALGLUSIDEtg	0	0	0	0	0	0	Transport, Extracellular	Transport
FUCGAL14ACGLCGALGLUSIDEte	0	0	0	0	0	0	Transport, Golgi Apparatus	Transport
FUCGAL14ACGLCGALGLUSIDEtg	0	0	0	0	0	0	Transport, Extracellular	Transport
FUCGALFUCGALACGLCGALGLUSIDEte	0	0	0	0	0	0	Transport, Golgi Apparatus	Transport
FUCGALFUCGALACGLCGALGLUSIDEtg	0	0	0	0	0	0	Transport, Extracellular	Transport
FUCGALGBSIDEte	0	0	0	0	0	0	Transport, Golgi Apparatus	Transport
FUCGALGBSIDEtg	0	0	0	0	0	0	Transport, Extracellular	Transport
FUCtly	0	0	0	0	0	0	Transport, Golgi Apparatus	Transport
FUM	-0.0540076	-0.0828598	-0.0684337	-0.0678563	-0.105554	-0.0867051	Transport, Lysosomal	Transport
FUMAC	0	0	0	0	0	0	Citric Acid Cycle	Central Metabolism
FUMm	0.0820454	0.132787	0.107416	0.0357589	0.133815	0.0847871	Tyrosine metabolism	Amino Acids
FUMSO3tm	0	0	0	0	0	0	Citric Acid Cycle	Central Metabolism
FUMSO4tm	0	0	0	0	0	0	Transport, Mitochondrial	Transport
FUMtm	0.0599591	0.088231	0.0740951	0.0202446	0.118301	0.0692728	Transport, Mitochondrial	Transport
FUMTSULtm	0	0	0	0	0	0	Transport, Mitochondrial	Transport
FUT11g	0	0	0	0	0	0	Transport, Mitochondrial	Transport
FUT12g	0	0	0	0	0	0	Sphingolipid Metabolism	Lipids
FUT14g	0	0	0	0	0	0	Blood Group Biosynthesis	Heme
FUT15g	0	0	0	0	0	0	Blood Group Biosynthesis	Heme
FUT16g	0	0	0	0	0	0	Blood Group Biosynthesis	Heme
FUT17g	0	0	0	0	0	0	Blood Group Biosynthesis	Heme
FUT18g	0	0	0	0	0	0	Blood Group Biosynthesis	Heme
FUT31g	0	0	0	0	0	0	Blood Group Biosynthesis	Heme
FUT32g	0	0	0	0	0	0	Blood Group Biosynthesis	Heme
FUT33g	0	0	0	0	0	0	Blood Group Biosynthesis	Heme
FUT34g	0	0	0	0	0	0	Blood Group Biosynthesis	Heme
FUT35g	0	0	0	0	0	0	Blood Group Biosynthesis	Heme
FUT910g	0	0	0	0	0	0	Blood Group Biosynthesis	Heme
FUT911g	0	0	0	0	0	0	Blood Group Biosynthesis	Heme
FUT91g	0	0	0	0	0	0	Blood Group Biosynthesis	Heme
FUT92g	0	0	0	0	0	0	Blood Group Biosynthesis	Heme
FUT93g	0	0	0	0	0	0	Blood Group Biosynthesis	Heme
FUT94g	0	0	0	0	0	0	Blood Group Biosynthesis	Heme
FUT95g	0	0	0	0	0	0	Blood Group Biosynthesis	Heme
FUT96g	0	0	0	0	0	0	Blood Group Biosynthesis	Heme
FUT97g	0	0	0	0	0	0	Blood Group Biosynthesis	Heme
FUT98g	0	0	0	0	0	0	Blood Group Biosynthesis	Heme
FUT99g	0	0	0	0	0	0	Blood Group Biosynthesis	Heme
G12MT1_L	0	0.0113377	0.00566884	0	0.0403549	0.0201774	Blood Group Biosynthesis	Heme
G12MT1_U	0	0.0113377	0.00566884	0	0.0403549	0.0201774	N-Glycan Biosynthesis	Glycosylation
G12MT2_L	0	0.0113377	0.00566884	0	0.0403549	0.0201774	N-Glycan Biosynthesis	Glycosylation
G12MT2_U	0	0.0113377	0.00566884	0	0.0403549	0.0201774	N-Glycan Biosynthesis	Glycosylation
G13MT_L	0	0.0113377	0.00566884	0	0.0403549	0.0201774	N-Glycan Biosynthesis	Glycosylation
G13MT_U	0	0.0113377	0.00566884	0	0.0403549	0.0201774	N-Glycan Biosynthesis	Glycosylation
G14T10g	0	0	0	0	0	0	N-Glycan Biosynthesis	Glycosylation
G14T11g	0	0	0	0	0	0	Keratan sulfate biosynthesis	Glycosylation
G14T12g	0	0	0	0	0	0	Keratan sulfate biosynthesis	Glycosylation
G14T13g	0	0	0	0	0	0	Keratan sulfate biosynthesis	Glycosylation
G14T14g	0	0	0	0	0	0	Keratan sulfate biosynthesis	Glycosylation
G14T15g	0	0	0	0	0	0	Keratan sulfate biosynthesis	Glycosylation
G14T16g	0	0	0	0	0	0	Keratan sulfate biosynthesis	Glycosylation
G14T17g	0	0	0	0	0	0	Keratan sulfate biosynthesis	Glycosylation
G14T18g	0	0	0	0	0	0	Keratan sulfate biosynthesis	Glycosylation
G14T19g	0	0	0	0	0	0	Keratan sulfate biosynthesis	Glycosylation
G14T20g	0	0	0	0	0	0	Keratan sulfate biosynthesis	Glycosylation
G14T21g	0	0	0	0	0	0	Keratan sulfate biosynthesis	Glycosylation
G14T2g	0	0.00756134	0.00378067	0	0.0269135	0.0134568	Keratan sulfate biosynthesis	Glycosylation
G14T3g	0	0.00756134	0.00378067	0	0.0269135	0.0134568	Keratan sulfate biosynthesis	Glycosylation
G14T4g	0	0.00756134	0.00378067	0	0.0269135	0.0134568	Keratan sulfate biosynthesis	Glycosylation
G14T5g	0	0.00756134	0.00378067	0	0.0269135	0.0134568	Keratan sulfate biosynthesis	Glycosylation
G14T6g	0	0	0	0	0	0	Keratan sulfate biosynthesis	Glycosylation
G14T7g	0	0	0	0	0	0	Keratan sulfate biosynthesis	Glycosylation
G14T8g	0	0	0	0	0	0	Keratan sulfate biosynthesis	Glycosylation
G14T9g	0	0	0	0	0	0	Keratan sulfate biosynthesis	Glycosylation
G14Tg	0	0	0	0	0	0	Keratan sulfate biosynthesis	Glycosylation
G16MT_L	0	0.0113377	0.00566884	0	0.0403549	0.0201774	N-Glycan Biosynthesis	Glycosylation
G16MT_U	0	0.0113377	0.00566884	0	0.0403549	0.0201774	N-Glycan Biosynthesis	Glycosylation
G1M6MASNB1terg	0	0	0	0	0	0	N-Glycan Biosynthesis	Glycosylation
G1M7MASNBterg	0	0	0	0	0	0	N-Glycan Biosynthesis	Glycosylation
G1M7MASNCterg	0	0	0	0	0	0	N-Glycan Biosynthesis	Glycosylation
G1M8MASNterg	0	0	0	0	0	0	N-Glycan Biosynthesis	Glycosylation
G2M8MASNterg	0	0	0	0	0	0	N-Glycan Biosynthesis	Glycosylation
G3M8MASNterg	0	0	0	0	0	0	N-Glycan Biosynthesis	Glycosylation
G3PD1	-0.546432	-0.00251454	-0.274473	-1.04115	0	-0.520577	N-Glycan Biosynthesis	Glycosylation
G3PD2m	0	0.543918	0.271959	0	0.923889	0.461945	Glycerophospholipid Metabolism	Lipids
G5SADrm	0.00935737	0.425947	0.217652	0.00425289	1.48067	0.74246	Glycolysis/Gluconeogenesis	Central Metabolism
G5SADs	0	0	0	0	0	0	Arginine and Proline Metabolism	Amino Acids
G5SDym	0	0.410991	0.205495	0	1.46286	0.731432	Urea cycle/amino group metabolism	Amino Acids
G6PDA	0	0.379999	0.19	0	1.21029	0.605144	Urea cycle/amino group metabolism	Amino Acids
G6PDH1er	0	1.70529	0.852647	0	1.70529	0.852647	Aminosugar Metabolism	Glycosylation
G6PDH1rer	0	-1.70642	-0.853212	0	-1.70529	-0.852647	Pentose Phosphate Pathway	Central Metabolism
G6PDH2r	0	0.36514	0.18257	0	0.647424	0.323712	Pentose Phosphate Pathway	Central Metabolism
G6PDH2rer	0	0.00113008	0.000565042	0	0	0	Pentose Phosphate Pathway	Central Metabolism
G6PPer	0	0.328792	0.164396	0	1.17029	0.585145	Pentose Phosphate Pathway	Central Metabolism
G6Pter	0	0.328792	0.164396	0	1.17029	0.585145	Glycolysis/Gluconeogenesis	Central Metabolism
GABAVESSEC	0	0.328792	0.164396	0	1.17029	0.585145	Transport, Endoplasmic Reticular	Transport
GACMTRc	0	0.046052	0.023026	0	0.0559538	0.0279769	Transport, Extracellular	Transport
GACPAILter	0	0	0	0	0	0	Urea cycle/amino group metabolism	Amino Acids
GALACGLCGALGBSIDEte	0	0	0	0	0	0	Transport, Endoplasmic Reticular	Transport
GALASE10ly	0	0	0	0	0	0	Transport, Extracellular	Transport
GALASE11ly	0	0	0	0	0	0	Keratan sulfate degradation	Glycosylation
GALASE12ly	0	0	0	0	0	0	Keratan sulfate degradation	Glycosylation
GALASE13ly	0	0	0	0	0	0	Keratan sulfate degradation	Glycosylation
GALASE14ly	0	0	0	0	0	0	Keratan sulfate degradation	Glycosylation
GALASE15ly	0	0	0	0	0	0	Keratan sulfate degradation	Glycosylation
GALASE16ly	0	0.00756134	0.00378067	0	0.0269135	0.0134568	Keratan sulfate degradation	Glycosylation
GALASE17ly	0	0.00756134	0.00378067	0	0.0269135	0.0134568	Keratan sulfate degradation	Glycosylation
GALASE18ly	0	0.00756134	0.00378067	0	0.0269135	0.0134568	Keratan sulfate degradation	Glycosylation
GALASE19ly	0	0.00756134	0.00378067	0	0.0269135	0.0134568	Keratan sulfate degradation	Glycosylation
GALASE1ly	0	0	0	0	0	0	Keratan sulfate degradation	Glycosylation
GALASE20ly	0	0	0	0	0	0	N-Glycan Degradation	Glycosylation
GALASE3ly	0	0	0	0	0	0	Keratan sulfate degradation	Glycosylation
GALASE4ly	0	0	0	0	0	0	Keratan sulfate degradation	Glycosylation
GALASE5ly	0	0	0	0	0	0	Keratan sulfate degradation	Glycosylation
GALASE6ly	0	0	0	0	0	0	Keratan sulfate degradation	Glycosylation
GALASE7ly	0	0	0	0	0	0	Keratan sulfate degradation	Glycosylation
GALASE8ly	0	0	0	0	0	0	Keratan sulfate degradation	Glycosylation
GALASE9ly	0	0	0	0	0	0	Keratan sulfate degradation	Glycosylation
GALC	0	0	0	0	0	0	Keratan sulfate degradation	Glycosylation
GALFUC12GAL14ACGLCGALGLUSIDEte	0	0	0	0	0	0	Sphingolipid Metabolism	Lipids
GALFUC12GAL14ACGLCGALGLUSIDEtg	0	0	0	0	0	0	Transport, Extracellular	Transport
GALFUCGALACGLCGAL14ACGLCGALGLUSIDEte	0	0	0	0	0	0	Transport, Golgi Apparatus	Transport
GALFUCGALACGLCGAL14ACGLCGALGLUSIDEtg	0	0	0	0	0	0	Transport, Extracellular	Transport
GALGALFUCFUCGALACGLCGALACGLCGAL14ACGLCGALGLUSIDEte	0	0	0	0	0	0	Transport, Golgi Apparatus	Transport
GALGALFUCFUCGALACGLCGALACGLCGAL14ACGLCGALGLUSIDEtg	0	0	0	0	0	0	Transport, Extracellular	Transport
GALGALGALTHCRMte	0	0	0	0	0	0	Transport, Golgi Apparatus	Transport
GALGLUSIDEtg	0	0	0	0	0	0	Transport, Extracellular	Transport
GALGLUSIDEtl	0	0	0	0	0	0	Transport, Golgi Apparatus	Transport
GALK	0	0.109597	0.0547987	0	0.390097	0.195048	Transport, Lysosomal	Transport
GALNACT1g	0	0	0	0	0	0	Galactose metabolism	Glycosylation
GALNACT2g	0	0	0	0	0	0	Chondroitin / heparan sulfate biosynthesis	Glycosylation
GALNACT3g	0	0	0	0	0	0	Chondroitin / heparan sulfate biosynthesis	Glycosylation
GALNACT4g	0	0	0	0	0	0	Chondroitin / heparan sulfate biosynthesis	Glycosylation
GALNACT5g	0	0	0	0	0	0	Chondroitin / heparan sulfate biosynthesis	Glycosylation
GALNTg	0	0.00756134	0.00378067	0	0.0269135	0.0134568	Chondroitin / heparan sulfate biosynthesis	Glycosylation
GALOR	0	0	0	0	0	0	O-Glycan Biosynthesis	Glycosylation
GALSIDEtl	0	0	0	0	0	0	Galactose metabolism	Glycosylation
GALT	0	0	0	0	0	0	Transport, Lysosomal	Transport
GALt1r	0	0	0	0	0	0	Galactose metabolism	Glycosylation
GALt2_2	0	0	0	0	0	0	Transport, Extracellular	Transport
GALT2g	0	0	0	0	0	0	Transport, Extracellular	Transport
GALt4	0	0	0	0	0	0	Chondroitin / heparan sulfate biosynthesis	Glycosylation
GALt4_2	0	0	0	0	0	0	Transport, Extracellular	Transport
GALTg	0	0	0	0	0	0	Transport, Extracellular	Transport
GALtly	0	0.0378067	0.0189034	0	0.134568	0.0672839	Chondroitin / heparan sulfate biosynthesis	Glycosylation
GALU	0.156798	0.202166	0.179482	0	0.161481	0.0807406	Transport, Lysosomal	Transport
GAMt1r	0	0	0	0	0	0	Galactose metabolism	Glycosylation
GAMYe	0	0	0	0	0	0	Transport, Extracellular	Transport
GAO1	0	0	0	0	0	0	Starch and Sucrose Metabolism	Glycogen
GAO1g	0	0	0	0	0	0	Sphingolipid Metabolism	Lipids
GAO2	0	0	0	0	0	0	Sphingolipid Metabolism	Lipids
GAO2g	0	0	0	0	0	0	Sphingolipid Metabolism	Lipids
GAPD	-0.0232111	0.215875	0.096332	-0.232566	0.516042	0.141738	Sphingolipid Metabolism	Lipids
GARFT	0.00347723	0.03039	0.0169336	0.00826754	0.040955	0.0246113	Glycolysis/Gluconeogenesis	Central Metabolism
GASNASE2ly	0	0.0113377	0.00566884	0	0.0403549	0.0201774	IMP Biosynthesis	Nucleotides
GASNASE3ly	0	0	0	0	0	0	N-Glycan Degradation	Glycosylation
GASNASEly	0	0	0	0	0	0	Keratan sulfate degradation	Glycosylation
GBA	0	0.109597	0.0547987	0	0.390097	0.195048	N-Glycan Degradation	Glycosylation
GBAl	0	0	0	0	0	0	Sphingolipid Metabolism	Lipids
GBGT1	0	0	0	0	0	0	Sphingolipid Metabolism	Lipids
GBSIDEte	0	0	0	0	0	0	Sphingolipid Metabolism	Lipids
GBSIDEtl	0	0	0	0	0	0	Transport, Extracellular	Transport
GCALDD	0	0	0	0	0	0	Transport, Lysosomal	Transport
GCALDDm	0	0	0	0	0	0	Glyoxylate and Dicarboxylate Metabolism	Central Metabolism
GCC2am	0	0.129594	0.0647969	0	0.233703	0.116851	Glyoxylate and Dicarboxylate Metabolism	Central Metabolism
GCC2bim	0	0.129594	0.0647969	0	0.233703	0.116851	Glycine, Serine, and Threonine Metabolism	Amino Acids
GCC2cm	0	0.129594	0.0647969	0	0.233703	0.116851	Glycine, Serine, and Threonine Metabolism	Amino Acids
GCCam	0	0.129594	0.0647969	0	0.233703	0.116851	Glycine, Serine, and Threonine Metabolism	Amino Acids
GCCbim	0	0.129594	0.0647969	0	0.233703	0.116851	Glycine, Serine, and Threonine Metabolism	Amino Acids
GCCcm	0	0.129594	0.0647969	0	0.233703	0.116851	Glycine, Serine, and Threonine Metabolism	Amino Acids
GCHOLAt	-10	0.332375	-4.83381	-10	0.477606	-4.7612	Glycine, Serine, and Threonine Metabolism	Amino Acids
GCHOLAt2	0	0	0	0	0	0	Transport, Extracellular	Transport
GCHOLAt3	0	0.328792	0.164396	0	1.17029	0.585145	Transport, Extracellular	Transport
GCHOLAte	10	-0.0316189	4.98419	10	0.828582	5.41429	Transport, Extracellular	Transport
GCHOLAtx	0	0	0	0	0	0	Transport, Extracellular	Transport
GCNTg	0	0	0	0	0	0	Transport, Peroxisomal	Transport
GD1B2te	0	0	0	0	0	0	Blood Group Biosynthesis	Heme
GD1B2tg	0	0	0	0	0	0	Transport, Extracellular	Transport
GD1Cte	0	0	0	0	0	0	Transport, Golgi Apparatus	Transport
GD1Ctg	0	0	0	0	0	0	Transport, Extracellular	Transport
GDCHOLAte	0	0	0	0	0	0	Transport, Golgi Apparatus	Transport
GDPFUCtg	0	0	0	0	0	0	Transport, Extracellular	Transport
GDPtg	0	0	0	0	0	0	Transport, Golgi Apparatus	Transport
GF6PTA	0	0.379999	0.19	0	1.21029	0.605144	Transport, Golgi Apparatus	Transport
GFUCS	0	0	0	0	0	0	Aminosugar Metabolism	Glycosylation
GGH-10FTHF5GLUe	0	0	0	0	0	0	Fructose and Mannose Metabolism	Glycosylation
GGH-10FTHF5GLUl	0	0.0821981	0.0410991	0	0.292573	0.146286	Folate Metabolism	Vitamins
GGH-10FTHF6GLUe	0	0	0	0	0	0	Folate Metabolism	Vitamins
GGH-10FTHF6GLUl	0	0.0657585	0.0328792	0	0.234058	0.117029	Folate Metabolism	Vitamins
GGH-10FTHF7GLUe	0	0	0	0	0	0	Folate Metabolism	Vitamins
GGH-10FTHF7GLUl	0	0.0547987	0.0273994	0	0.195048	0.0975242	Folate Metabolism	Vitamins
GGH-5DHFe	0	0	0	0	0	0	Folate Metabolism	Vitamins
GGH-5DHFl	0	0.0821981	0.0410991	0	0.292573	0.146286	Folate Metabolism	Vitamins
GGH-5THFe	0	0	0	0	0	0	Folate Metabolism	Vitamins
GGH-5THFl	0	0.0821981	0.0410991	0	0.292573	0.146286	Folate Metabolism	Vitamins
GGH-6DHFe	0	0	0	0	0	0	Folate Metabolism	Vitamins
GGH-6DHFl	0	0.0657585	0.0328792	0	0.234058	0.117029	Folate Metabolism	Vitamins
GGH-6THFe	0	0	0	0	0	0	Folate Metabolism	Vitamins
GGH-6THFl	0	0.0657585	0.0328792	0	0.234058	0.117029	Folate Metabolism	Vitamins
GGH-7DHFe	0	0	0	0	0	0	Folate Metabolism	Vitamins
GGH-7DHFl	0	0.0547987	0.0273994	0	0.195048	0.0975242	Folate Metabolism	Vitamins
GGH-7THFe	0	0	0	0	0	0	Folate Metabolism	Vitamins
GGH-7THFl	0	0.0547987	0.0273994	0	0.195048	0.0975242	Folate Metabolism	Vitamins
GGLUCT	0	0.109597	0.0547987	0	0.390097	0.195048	Folate Metabolism	Vitamins
GGNG	0.0142544	0.0315593	0.0229068	0	0.0615942	0.0307971	Glutathione Metabolism	ROS
GGT_L	0	0	0	0	0	0	Starch and Sucrose Metabolism	Glycogen
GGT_U	0	0	0	0	0	0	N-Glycan Biosynthesis	Glycosylation
GGT5r	0	0	0	0	0	0	N-Glycan Biosynthesis	Glycosylation
GGT6	0	0	0	0	0	0	Eicosanoid Metabolism	UFAS
GHMT2r	0.0133832	0.167143	0.0902632	0.0182776	0.29426	0.156269	Eicosanoid Metabolism	UFAS
GHMT2rm	0	0	0	0	0	0	Glycine, Serine, and Threonine Metabolism	Amino Acids
GHMT3	0	0	0	0	0	0	Glycine, Serine, and Threonine Metabolism	Amino Acids
GHMT3m	0	0	0	0	0	0	Lysine Metabolism	Amino Acids
GK1	0	0.16538	0.0826899	0.00378797	0.588933	0.296361	Lysine Metabolism	Amino Acids
GK1m	0	0	0	0	0	0	Nucleotides	Nucleotides
GLACO	0	0	0	0	0	0	Nucleotides	Nucleotides
GLACOm	0	0	0	0	0	0	Ascorbate and Aldarate Metabolism	Vitamins
GLACter	-0.0102067	0	-0.00510336	0	0	0	Ascorbate and Aldarate Metabolism	Vitamins
GLAl	0	0	0	0	0	0	Transport, Endoplasmic Reticular	Transport
GLB1	0	0	0	0	0	0	Sphingolipid Metabolism	Lipids
GLBRAN	0.0142544	0.0315593	0.0229068	0	0.0615942	0.0307971	Sphingolipid Metabolism	Lipids
GLCAASE1ly	0	0	0	0	0	0	Starch and Sucrose Metabolism	Glycogen
GLCAASE4ly	0	0	0	0	0	0	Heparan sulfate degradation	Glycosylation
GLCAASE5ly	0	0	0	0	0	0	Chondroitin sulfate degradation	Glycosylation
GLCAASE6ly	0	0	0	0	0	0	Chondroitin sulfate degradation	Glycosylation
GLCAASE7ly	0	0	0	0	0	0	Chondroitin sulfate degradation	Glycosylation
GLCAASE8ly	0	0.0347351	0.0173675	0	0.114908	0.0574541	Chondroitin sulfate degradation	Glycosylation
GLCAASE9ly	0	0.0347351	0.0173675	0	0.114908	0.0574541	Hyaluronan Metabolism	Glycosylation
GLCAE2g	0	0	0	0	0	0	Hyaluronan Metabolism	Glycosylation
GLCAT2g	0	0	0	0	0	0	Chondroitin / heparan sulfate biosynthesis	Glycosylation
GLCAT3g	0	0	0	0	0	0	Chondroitin / heparan sulfate biosynthesis	Glycosylation
GLCAT4g	0	0	0	0	0	0	Chondroitin / heparan sulfate biosynthesis	Glycosylation
GLCAT5g	0	0	0	0	0	0	Chondroitin / heparan sulfate biosynthesis	Glycosylation
GLCAT6g	0	0	0	0	0	0	Chondroitin / heparan sulfate biosynthesis	Glycosylation
GLCAT7g	0	0	0	0	0	0	Chondroitin / heparan sulfate biosynthesis	Glycosylation
GLCAT8g	0	0	0	0	0	0	Chondroitin / heparan sulfate biosynthesis	Glycosylation
GLCAT9g	0	0	0	0	0	0	Chondroitin / heparan sulfate biosynthesis	Glycosylation
GLCATg	0	0	0	0	0	0	Chondroitin / heparan sulfate biosynthesis	Glycosylation
GLCMter	0	0	0	0	0	0	Chondroitin / heparan sulfate biosynthesis	Glycosylation
GLCNACASE1ly	0	0	0	0	0	0	Transport, Extracellular	Transport
GLCNACASE2ly	0	0	0	0	0	0	Heparan sulfate degradation	Glycosylation
GLCNACASE3ly	0	0	0	0	0	0	Heparan sulfate degradation	Glycosylation
GLCNACASE4ly	0	0	0	0	0	0	Heparan sulfate degradation	Glycosylation
GLCNACASE5ly	0	0	0	0	0	0	Heparan sulfate degradation	Glycosylation
GLCNACDASg	0	0	0	0	0	0	Heparan sulfate degradation	Glycosylation
GLCNACPT_L	0	0.0113377	0.00566884	0	0.0403549	0.0201774	Chondroitin / heparan sulfate biosynthesis	Glycosylation
GLCNACPT_U	0	0.0113377	0.00566884	0	0.0403549	0.0201774	N-Glycan Biosynthesis	Glycosylation
GLCNACT_L	0	0.0113377	0.00566884	0	0.0403549	0.0201774	N-Glycan Biosynthesis	Glycosylation
GLCNACT_U	0	0.0113377	0.00566884	0	0.0403549	0.0201774	N-Glycan Biosynthesis	Glycosylation
GLCNACT1g	0	0	0	0	0	0	N-Glycan Biosynthesis	Glycosylation
GLCNACT2g	0	0	0	0	0	0	Chondroitin / heparan sulfate biosynthesis	Glycosylation
GLCNACT3g	0	0	0	0	0	0	Chondroitin / heparan sulfate biosynthesis	Glycosylation
GLCNACT4g	0	0	0	0	0	0	Chondroitin / heparan sulfate biosynthesis	Glycosylation
GLCNACT5g	0	0	0	0	0	0	Chondroitin / heparan sulfate biosynthesis	Glycosylation
GLCt1r	0	0	0	0	0	0	Chondroitin / heparan sulfate biosynthesis	Glycosylation
GLCt2_2	0.2718	0.2718	0.2718	0.2718	0.2718	0.2718	Transport, Extracellular	Transport
GLCt2r	0	0	0	0	0	0	Transport, Extracellular	Transport
GLCt4	0	0	0	0	0	0	Transport, Extracellular	Transport
GLCt4_2	0	0	0	0	0	0	Transport, Extracellular	Transport
GLCter	-0.328792	0	-0.164396	-1.17029	0	-0.585145	Transport, Extracellular	Transport
GLCtg	0	0.109597	0.0547987	0	0.390097	0.195048	Transport, Endoplasmic Reticular	Transport
GLCtly	0	0	0	0	0	0	Transport, Golgi Apparatus	Transport
GLCURter	0	0.126626	0.0633129	0	0.396123	0.198062	Transport, Lysosomal	Transport
GLCURtly	-0.0694701	0	-0.0347351	-0.229816	0	-0.114908	Transport, Endoplasmic Reticular	Transport
GLDBRAN	0	0.0173049	0.00865243	0	0.0615942	0.0307971	Transport, Lysosomal	Transport
GLGNS1	0.0142544	0.0315593	0.0229068	0	0.0615942	0.0307971	Starch and Sucrose Metabolism	Glycogen
GLNALANaEx	0	0	0	0	0	0	Starch and Sucrose Metabolism	Glycogen
GLNASNNaEx	0	0	0	0	0	0	Transport, Extracellular	Transport
GLNCYSNaEx	0	0	0	0	0	0	Transport, Extracellular	Transport
GLNLASEer	-0.113051	0	-0.0565254	-0.563557	0	-0.281779	Transport, Extracellular	Transport
GLNS	0	0.328792	0.164396	0	1.17029	0.585145	Ascorbate and Aldarate Metabolism	Vitamins
GLNSERNaEx	0	0	0	0	0	0	Glutamate metabolism	Amino Acids
GLNt4	0	0	0	0	0	0	Transport, Extracellular	Transport
GLNTHRNaEx	0	0	0	0	0	0	Transport, Extracellular	Transport
GLNtm	0	0.202208	0.101104	0	0.574398	0.287199	Transport, Extracellular	Transport
GLNtN1	0.0765	0.0865	0.0815	0.0302741	0.0402741	0.0352741	Transport, Mitochondrial	Transport
GLPASE1	0	0.0173049	0.00865243	0	0.0615942	0.0307971	Transport, Extracellular	Transport
GLPASE2	0	0.0173049	0.00865243	0	0.0615942	0.0307971	Starch and Sucrose Metabolism	Glycogen
GLRASE	-0.188313	0	-0.0941565	-0.583477	0	-0.291738	Starch and Sucrose Metabolism	Glycogen
GLU5Km	0	0.410991	0.205495	0	1.46286	0.731432	Ascorbate and Aldarate Metabolism	Vitamins
GLUCYS	0	0.110179	0.0550894	0	0.391253	0.195626	Urea cycle/amino group metabolism	Amino Acids
GLUDxm	-4.70637	4.4962	-0.105083	-5.07844	4.4962	-0.291122	Glutathione Metabolism	ROS
GLUDym	-4.70637	4.4962	-0.105083	-5.07844	4.4962	-0.291122	Glutamate metabolism	Amino Acids
GluForTx	0	0.00584639	0.0029232	0	0.00732614	0.00366307	Glutamate metabolism	Amino Acids
GLUNm	0	0.202208	0.101104	0	0.574398	0.287199	Histidine Metabolism	Amino Acids
GLUPRT	0.00347723	0.03039	0.0169336	0.00826754	0.040955	0.0246113	Glutamate metabolism	Amino Acids
GLUt2m	-0.432347	0.304219	-0.064064	-1.20158	1.13614	-0.0327206	IMP Biosynthesis	Nucleotides
GLUt6	0	0.328792	0.164396	0	1.17029	0.585145	Transport, Mitochondrial	Transport
GLUt7l	0	0.328792	0.164396	0	1.17029	0.585145	Transport, Extracellular	Transport
GLUTCOADHm	0	0	0	0	0	0	Transport, Lysosomal	Transport
GLUtr	0	0	0	0	0	0	Tryptophan metabolism	Amino Acids
GLUVESSEC	0	0.328792	0.164396	0	1.17029	0.585145	Transport, Endoplasmic Reticular	Transport
GLXO1	0	0	0	0	0	0	Transport, Extracellular	Transport
GLXtm	0	0	0	0	0	0	Glyoxylate and Dicarboxylate Metabolism	Central Metabolism
GLXtp	0	0	0	0	0	0	Transport, Mitochondrial	Transport
GLYAMDTRc	0	0.046052	0.023026	0	0.0559538	0.0279769	Transport, Peroxisomal	Transport
GLYATm	0	0	0	0	0	0	Urea cycle/amino group metabolism	Amino Acids
GLYBt4(2)r	-0.0262582	0	-0.0131291	-0.0904235	0	-0.0452118	Glycine, Serine, and Threonine Metabolism	Amino Acids
GLYBtm	0	0.0262582	0.0131291	0	0.0904235	0.0452118	Transport, Extracellular	Transport
GLYC-St	0	0	0	0	0	0	Transport, Mitochondrial	Transport
GLYC3Ptm	0	0	0	0	0	0	Transport, Extracellular	Transport
GLYCK2	0	0	0	0	0	0	Transport, Mitochondrial	Transport
GLYCLTDy	0	0	0	0	0	0	Glyoxylate and Dicarboxylate Metabolism	Central Metabolism
GLYCLTtp	0	0	0	0	0	0	Glyoxylate and Dicarboxylate Metabolism	Central Metabolism
GLYCt	0	0.239086	0.119543	0	0.679917	0.339958	Transport, Peroxisomal	Transport
GLYCtm	0	0	0	0	0	0	Transport, Extracellular	Transport
GLYK	0	0	0	0	0	0	Transport, Mitochondrial	Transport
GLYKm	0	0	0	0	0	0	Glycerophospholipid Metabolism	Lipids
GLYOX	0	0.144324	0.0721619	0	0.535667	0.267834	Glycerophospholipid Metabolism	Lipids
GLYOXm	0	0	0	0	0	0	Pyruvate Metabolism	Central Metabolism
GLYt2r	-0.0881977	0.89654	0.404171	-0.0153973	3.45748	1.72104	Pyruvate Metabolism	Central Metabolism
GLYt2rL	0	0	0	0	0	0	Transport, Extracellular	Transport
GLYt4	0	0	0	0	0	0	Transport, Lysosomal	Transport
GLYt7(211)r	0.0665876	0.0665876	0.0665876	0.0153801	0.053389	0.0343845	Transport, Extracellular	Transport
GLYt7(311)r	0	0	0	0	0	0	Transport, Extracellular	Transport
GLYtm	0	0.129594	0.0647969	0	0.233703	0.116851	Transport, Extracellular	Transport
GLYtp	0	0	0	0	0	0	Transport, Mitochondrial	Transport
GLYVESSEC	0	0.328792	0.164396	0	1.17029	0.585145	Transport, Peroxisomal	Transport
GMAND	0	0	0	0	0	0	Transport, Extracellular	Transport
GMPR	0	0.126666	0.0633332	0	0.403429	0.201715	Fructose and Mannose Metabolism	Glycosylation
GMPS2	0.00158324	0.12825	0.0649165	0.00378797	0.407217	0.205503	Nucleotides	Nucleotides
GMPtg	0	0	0	0	0	0	Nucleotides	Nucleotides
GMPtn	-0.136997	0	-0.0684984	-0.487621	0	-0.243811	Transport, Golgi Apparatus	Transport
GND	0	0.36514	0.18257	0	0.647424	0.323712	Transport, Nuclear	Transport
GNDer	0	0	0	0	0	0	Pentose Phosphate Pathway	Central Metabolism
GNMT	0	0	0	0	0	0	Pentose Phosphate Pathway	Central Metabolism
GP1CALPHAte	0	0	0	0	0	0	Glycine, Serine, and Threonine Metabolism	Amino Acids
GP1CALPHAtg	0	0	0	0	0	0	Transport, Extracellular	Transport
GP1Cte	0	0	0	0	0	0	Transport, Golgi Apparatus	Transport
GP1Ctg	0	0	0	0	0	0	Transport, Extracellular	Transport
GPAM_hs	0.00227379	0.0131221	0.00769793	0	0.275794	0.137897	Transport, Golgi Apparatus	Transport
GPAMm_hs	0	0	0	0	0	0	Triacylglycerol Synthesis	Lipids
GPDDA1	0	0.164396	0.0821981	0	0.585145	0.292573	Triacylglycerol Synthesis	Lipids
GPIAT	0	0	0	0	0	0	Glycerophospholipid Metabolism	Lipids
GPIMTer_L	0	0	0	0	0	0	Glycosylphosphatidylinositol (GPI)-anchor biosynthesis	Glycosylation
GPIMTer_U	0	0	0	0	0	0	Glycosylphosphatidylinositol (GPI)-anchor biosynthesis	Glycosylation
GQ1BALPHAte	0	0	0	0	0	0	Glycosylphosphatidylinositol (GPI)-anchor biosynthesis	Glycosylation
GQ1BALPHAtg	0	0	0	0	0	0	Transport, Extracellular	Transport
GQ1Bte	0	0	0	0	0	0	Transport, Golgi Apparatus	Transport
GQ1Btg	0	0	0	0	0	0	Transport, Extracellular	Transport
GRTT	0	0	0	0	0	0	Transport, Golgi Apparatus	Transport
GRTTx	0.00113008	0.0121053	0.00661769	0	0.0383156	0.0191578	Cholesterol Metabolism	Steriods
GSNKm	0	0	0	0	0	0	Cholesterol Metabolism	Steriods
GSNt	-0.000580278	0	-0.000290139	0	0	0	Nucleotides	Nucleotides
GSNt4	0	0	0	0	0	0	Transport, Extracellular	Transport
GSNt5	0	0	0	0	0	0	Transport, Extracellular	Transport
GSNtl	0	0	0	0	0	0	Transport, Extracellular	Transport
GSNtm	0	0	0	0	0	0	Transport, Lysosomal	Transport
GT1Ate	0	0	0	0	0	0	Transport, Mitochondrial	Transport
GT1Atg	0	0	0	0	0	0	Transport, Extracellular	Transport
GTHDH	0	0.410991	0.205495	0	0.610053	0.305026	Transport, Golgi Apparatus	Transport
GTHO	0	0.159093	0.0795466	0	0.45754	0.22877	Ascorbate and Aldarate Metabolism	Vitamins
GTHOm	0	0.145056	0.0725278	0	0.45754	0.22877	Glutamate metabolism	Amino Acids
GTHP	-0.410991	0.149451	-0.13077	-0.610053	0.305026	-0.152513	Glutamate metabolism	Amino Acids
GTHPe	0	0	0	0	0	0	Glutathione Metabolism	ROS
GTHPm	0	0.145056	0.0725278	0	0.45754	0.22877	Glutathione Metabolism	ROS
GTHRDt	0	0	0	0	0	0	Glutathione Metabolism	ROS
GTHRDtr	0	0	0	0	0	0	Glutathione Metabolism	ROS
GTHS	0	0.110179	0.0550894	0	0.391253	0.195626	Transport, Endoplasmic Reticular	Transport
GTMLTe	0	0.110179	0.0550894	0	0.391253	0.195626	Glutathione Metabolism	ROS
GTPCI	0	0	0	0	0	0	Glutathione Metabolism	ROS
GTPCIn	0	0	0	0	0	0	Tetrahydrobiopterin	Vitamins
GTPtn	0	0	0	0	0	0	Tetrahydrobiopterin	Vitamins
GUACYC	0	0.164396	0.0821981	0	0.585145	0.292573	Transport, Nuclear	Transport
GUAD	0	0	0	0	0	0	Nucleotides	Nucleotides
GUAPRT	0	0.164977	0.0824883	0	0.585145	0.292573	Purine Catabolism	Nucleotides
GUAt	-0.0215302	0	-0.0107651	-0.02615	0	-0.013075	Salvage Pathway	Nucleotides
GULLACter	0	0.034246	0.017123	0	0	0	Transport, Extracellular	Transport
GULN3D	0	0.126626	0.0633129	0	0.396123	0.198062	Transport, Endoplasmic Reticular	Transport
GULNDer	-0.00798478	0.126626	0.0593206	0	0.396123	0.198062	Pentose and Glucuronate Interconversions	Central Metabolism
GULNter	0	0.126626	0.0633129	0	0.396123	0.198062	Pentose and Glucuronate Interconversions	Central Metabolism
GUR1PP	0	0.0935002	0.0467501	0	0.30104	0.15052	Transport, Endoplasmic Reticular	Transport
H2CO3D	-9.99663	0.701529	-4.64755	-9.99173	1.53259	-4.22957	Pentose and Glucuronate Interconversions	Central Metabolism
H2CO3D2	-0.701529	9.99663	4.64755	-1.53259	9.99173	4.22957	Miscellaneous	Misc
H2CO3D2m	0	0	0	0	0	0	Miscellaneous	Misc
H2ETer	0	0	0	0	0	0	Miscellaneous	Misc
H2MTer_L	0	0	0	0	0	0	Glycosylphosphatidylinositol (GPI)-anchor biosynthesis	Glycosylation
H2MTer_U	0	0	0	0	0	0	Glycosylphosphatidylinositol (GPI)-anchor biosynthesis	Glycosylation
H2O2t	-0.153457	0.410991	0.128767	-0.45754	0.610053	0.0762566	Glycosylphosphatidylinositol (GPI)-anchor biosynthesis	Glycosylation
H2O2tly	0	0.159093	0.0795466	0	0.45754	0.22877	Transport, Extracellular	Transport
H2O2tm	-0.594531	1.23297	0.319221	-0.610053	1.83016	0.610053	Transport, Lysosomal	Transport
H2O2tn	-0.117426	0	-0.0587129	-0.417961	0	-0.20898	Transport, Mitochondrial	Transport
H2O2tp	-0.410991	1.23297	0.410991	-0.610053	1.83016	0.610053	Transport, Nuclear	Transport
H2Ot	-10.5605	-10.4093	-10.4849	-10.6299	-0.0714479	-5.3507	Transport, Peroxisomal	Transport
H2Oter	-0.188747	0.508089	0.159671	-0.601785	1.21378	0.305999	Transport, Extracellular	Transport
H2Otg	0	0.164396	0.0821981	0	0.585145	0.292573	Transport, Endoplasmic Reticular	Transport
H2Otly	-0.318186	0.328792	0.0053031	-0.915079	1.17029	0.127606	Transport, Golgi Apparatus	Transport
H2Otm	-1.30105	-1.12896	-1.215	-1.71385	-0.403784	-1.05882	Transport, Lysosomal	Transport
H2Otn	-0.514174	0	-0.257087	-1.21378	0	-0.606892	Transport, Mitochondrial	Transport
H2Otp	-1.23297	0.166721	-0.533125	-1.83016	0.589768	-0.620195	Transport, Nuclear	Transport
H3ETer	0	0	0	0	0	0	Transport, Peroxisomal	Transport
H3MTer_L	0	0	0	0	0	0	Glycosylphosphatidylinositol (GPI)-anchor biosynthesis	Glycosylation
H3MTer_U	0	0	0	0	0	0	Glycosylphosphatidylinositol (GPI)-anchor biosynthesis	Glycosylation
H4ETer	0	0	0	0	0	0	Glycosylphosphatidylinositol (GPI)-anchor biosynthesis	Glycosylation
H5MTer_L	0	0	0	0	0	0	Glycosylphosphatidylinositol (GPI)-anchor biosynthesis	Glycosylation
H5MTer_U	0	0	0	0	0	0	Glycosylphosphatidylinositol (GPI)-anchor biosynthesis	Glycosylation
H6ET2er	0	0	0	0	0	0	Glycosylphosphatidylinositol (GPI)-anchor biosynthesis	Glycosylation
H6ETer	0	0	0	0	0	0	Glycosylphosphatidylinositol (GPI)-anchor biosynthesis	Glycosylation
H6MTer_L	0	0	0	0	0	0	Glycosylphosphatidylinositol (GPI)-anchor biosynthesis	Glycosylation
H6MTer_U	0	0	0	0	0	0	Glycosylphosphatidylinositol (GPI)-anchor biosynthesis	Glycosylation
H7ET2er	0	0	0	0	0	0	Glycosylphosphatidylinositol (GPI)-anchor biosynthesis	Glycosylation
H7ETer	0	0	0	0	0	0	Glycosylphosphatidylinositol (GPI)-anchor biosynthesis	Glycosylation
H7MTer_L	0	0	0	0	0	0	Glycosylphosphatidylinositol (GPI)-anchor biosynthesis	Glycosylation
[truncated: 1,395 more rows]

## Sheet: ZIKV
Reaction ID	Flux Variability Analysis Host-Optimised Fluxes (mmol/gDW/h-1)			Flux Varability Analysis Virus-Optimised Fluxes (mmol/gDW/h-1)			Model Subsystem ID	Aggregate Subsystem[1]
	Minimum Flux (F-)	Maximum Flux (F+)	Median Flux Value (F+ - ((F+ - F-) / 2)	Minimum Flux (F-)	Maximum Flux (F+)	Median Flux Value (F+ - ((F+ - F-) / 2)
10FTHF5GLUtl	0	0.0821981	0.0410991	0	0.252351	0.126176	Transport, Lysosomal	Transport
10FTHF5GLUtm	0	0.0821981	0.0410991	0	0.252351	0.126176	Transport, Mitochondrial	Transport
10FTHF6GLUtl	0	0.0657585	0.0328792	0	0.201881	0.100941	Transport, Lysosomal	Transport
10FTHF6GLUtm	0	0.0657585	0.0328792	0	0.201881	0.100941	Transport, Mitochondrial	Transport
10FTHF7GLUtl	0	0.0547987	0.0273994	0	0.168234	0.0841171	Transport, Lysosomal	Transport
10FTHF7GLUtm	0	0.0547987	0.0273994	0	0.168234	0.0841171	Transport, Mitochondrial	Transport
10FTHFtl	-0.0821981	0	-0.0410991	-0.252351	0	-0.126176	Transport, Lysosomal	Transport
10FTHFtm	-0.12986	0.0821981	-0.0238308	-0.213491	0.252351	0.0194304	Transport, Mitochondrial	Transport
13DAMPPOX	0	0	0	0	0	0	beta-Alanine metabolism	Amino Acids
1a,24,25VITD2Hm	0	0	0	0	0	0	Vitamin D	Vitamins
1a,24,25VITD3Hm	0	0	0	0	0	0	Vitamin D	Vitamins
1a,25VITD2Hm	0	0	0	0	0	0	Vitamin D	Vitamins
1a,25VITD3Hm	0	0	0	0	0	0	Vitamin D	Vitamins
1MNCAMti	0	0	0	0	0	0	Transport, Extracellular	Transport
24,25DHVITD2t	0	0	0	0	0	0	Transport, Extracellular	Transport
24,25DHVITD2tm	0	0	0	0	0	0	Transport, Mitochondrial	Transport
24,25DHVITD3t	0	0.00486126	0.00243063	0	0.0147859	0.00739297	Transport, Extracellular	Transport
24,25DHVITD3tm	0	0.00486126	0.00243063	0	0.0147859	0.00739297	Transport, Mitochondrial	Transport
24,25VITD2Hm	0	0	0	0	0	0	Vitamin D	Vitamins
24,25VITD3Hm	0	0.00486126	0.00243063	0	0.0147859	0.00739297	Vitamin D	Vitamins
24NPHte	0	0	0	0	0	0	Transport, Extracellular	Transport
25HVITD2t	0	0	0	0	0	0	Transport, Extracellular	Transport
25HVITD2tin	0	0	0	0	0	0	Transport, Extracellular	Transport
25HVITD2tin-m	0	0	0	0	0	0	Transport, Mitochondrial	Transport
25HVITD2tm	0	0	0	0	0	0	Transport, Mitochondrial	Transport
25HVITD3t	0	0	0	0	0	0	Transport, Extracellular	Transport
25HVITD3tin	0	0	0	0	0	0	Transport, Extracellular	Transport
25HVITD3tin-m	0	0	0	0	0	0	Transport, Mitochondrial	Transport
25HVITD3tm	0	0	0	0	0	0	Transport, Mitochondrial	Transport
25VITD2Hm	0	0	0	0	0	0	Vitamin D	Vitamins
25VITD3Hm	0	0	0	0	0	0	Vitamin D	Vitamins
2DR1PP	0	0.0666697	0.0333349	0	0.218723	0.109362	Pyrimidine Catabolism	Nucleotides
2HBO	-0.00838558	0	-0.00419279	-0.00506721	0	-0.00253361	Propanoate Metabolism	FAS
2HBt2	-0.00838558	0	-0.00419279	-0.00506721	0	-0.00253361	Transport, Extracellular	Transport
2HCO3_NAt	0	0	0	0	0	0	Transport, Extracellular	Transport
2MCITt	0	0.00838558	0.00419279	0	0.00506721	0.00253361	Transport, Extracellular	Transport
2OXOADOXm	0	0	0	0	0	0	Lysine Metabolism	Amino Acids
2OXOADPTm	0	0	0	0	0	0	Tryptophan metabolism	Amino Acids
34DHPHAMT	0	0	0	0	0	0	Tyrosine metabolism	Amino Acids
34DHPLACOX	0	0	0	0	0	0	Tyrosine metabolism	Amino Acids
34DHPLACOX(NADP)	0	0	0	0	0	0	Tyrosine metabolism	Amino Acids
34HPLFM	0	0	0	0	0	0	Ubiquinone Biosynthesis	Vitamins
35CGMPtn	0	0.136997	0.0684984	0	0.420586	0.210293	Transport, Nuclear	Transport
3AIBt	0	0.000626959	0.00031348	0	0.000124224	6.21118e-05	Transport, Extracellular	Transport
3AIBTm	0	0.000626959	0.00031348	0	0.000124224	6.21118e-05	Valine, Leucine, and Isoleucine Metabolism	Amino Acids
3AIBtm	0	0.000626959	0.00031348	0	0.000124224	6.21118e-05	Valine, Leucine, and Isoleucine Metabolism	Amino Acids
3DPHBH1	0	0	0	0	0	0	Ubiquinone Biosynthesis	Vitamins
3DPHBH2	0	0	0	0	0	0	Ubiquinone Biosynthesis	Vitamins
3DSPHR	0.00019031	0.0821711	0.0411807	0	0.091628	0.045814	Sphingolipid Metabolism	Lipids
3HAO	0	0	0	0	0	0	Tryptophan metabolism	Amino Acids
3HBCDm	0	0	0	0	0	0	Butanoate Metabolism	FAS
3HBCOAHLm	0	0.000626959	0.00031348	0	0.000124224	6.21118e-05	Valine, Leucine, and Isoleucine Metabolism	Amino Acids
3HCO3_NAt	0	0	0	0	0	0	Transport, Extracellular	Transport
3HLYTCL	0	0	0	0	0	0	Tyrosine metabolism	Amino Acids
3HPCOAHYD	0	0	0	0	0	0	beta-Alanine metabolism	Amino Acids
3HXKYNDCL	0	0	0	0	0	0	Tryptophan metabolism	Amino Acids
3HXKYNOXDA	0	0	0	0	0	0	Tryptophan metabolism	Amino Acids
3M4HDXPAC	0	0	0	0	0	0	Tyrosine metabolism	Amino Acids
3MLDAt	0	0.00584639	0.0029232	0	0.00611477	0.00305738	Transport, Extracellular	Transport
3MOBt2im	0	0	0	0	0	0	Transport, Mitochondrial	Transport
3MOPt2im	0	0	0	0	0	0	Transport, Mitochondrial	Transport
3MOX4HOXPGALDOX	0	0	0	0	0	0	Tyrosine metabolism	Amino Acids
3MOX4HOXPGALDOX(NADP)	0	0	0	0	0	0	Tyrosine metabolism	Amino Acids
3MOXTYROX	0	0	0	0	0	0	Tyrosine metabolism	Amino Acids
3NTD7l	0	0	0	0	0	0	Nucleic acid degradation	Nucleotides
3SALAASPm	0	0	0	0	0	0	Transport, Mitochondrial	Transport
3SALATAi	0	0	0	0	0	0	Cysteine Metabolism	Amino Acids
3SALATAim	0	0	0	0	0	0	Cysteine Metabolism	Amino Acids
41R1H2MAE12BOOX	0	0	0	0	0	0	Tyrosine metabolism	Amino Acids
41R2A1H12BOOX	0	0	0	0	0	0	Tyrosine metabolism	Amino Acids
42A12BOOX	0	0	0	0	0	0	Tyrosine metabolism	Amino Acids
4ABUTtm	0	0.088466	0.044233	0	0.19489	0.0974452	Transport, Mitochondrial	Transport
4HBZCOAFm	0	0	0	0	0	0	Ubiquinone Biosynthesis	Vitamins
4HBZFm	0	0	0	0	0	0	Ubiquinone Biosynthesis	Vitamins
4HDEBRISOQUINEte	0	0	0	0	0	0	Transport, Extracellular	Transport
4HGLSDm	0	0	0	0	0	0	Arginine and Proline Metabolism	Amino Acids
4HOXPACDOX(NADP)	0	0	0	0	0.00253361	0.0012668	Tyrosine metabolism	Amino Acids
4MOPt2im	0	0	0	0	0	0	Transport, Mitochondrial	Transport
4MPTNLte	0	0	0	0	0	0	Transport, Extracellular	Transport
4MPTNLtm	0	0	0	0	0	0	Transport, Mitochondrial	Transport
4MPTNLtr	0	0	0	0	0	0	Transport, Endoplasmic Reticular	Transport
4NPHSFte	0	0	0	0	0	0	Transport, Extracellular	Transport
4NPHSULT	0	0	0	0	0	0	CYP Metabolism	UFAS
4NPHte	0	0	0	0	0	0	Transport, Extracellular	Transport
4PYRDX	0	0	0	0	0	0	Transport, Extracellular	Transport
5ADTSTSTERONEGLCte	0	0	0	0	0	0	Transport, Extracellular	Transport
5ADTSTSTERONEGLCtr	0	0	0	0	0	0	Transport, Endoplasmic Reticular	Transport
5ADTSTSTERONEte	0	0	0	0	0	0	Transport, Extracellular	Transport
5ADTSTSTERONEtr	0	0	0	0	0	0	Transport, Endoplasmic Reticular	Transport
5DHFtl	0	0.0821981	0.0410991	0	0.252351	0.126176	Transport, Lysosomal	Transport
5FTHFt2	0	0	0	0	0	0	Transport, Extracellular	Transport
5HLTDL	0	0.00811912	0.00405956	0	0.00725966	0.00362983	Tryptophan metabolism	Amino Acids
5HOXINDACTO2OX	0	0	0	0	0	0	Tryptophan metabolism	Amino Acids
5HOXINDACTOX	0	0	0	0	0	0	Tryptophan metabolism	Amino Acids
5HOXINDACTOXm	0	0	0	0	0	0	Tryptophan metabolism	Amino Acids
5HOXINOXDA	0	0	0	0	0	0	Tryptophan metabolism	Amino Acids
5HTRPDOX	0	0	0	0	0	0	Tryptophan metabolism	Amino Acids
5HTRPVESSEC	0	0.00270637	0.00135319	0	0.00241989	0.00120994	Transport, Extracellular	Transport
5HXKYNDCL	0	0	0	0	0	0	Tryptophan metabolism	Amino Acids
5HXKYNOXDA	0	0	0	0	0	0	Tryptophan metabolism	Amino Acids
5MTHFt	0	0	0	0	0	0	Transport, Extracellular	Transport
5MTHFt2	0	0	0	0	0	0	Transport, Extracellular	Transport
5THFtl	0	0.0821981	0.0410991	0	0.252351	0.126176	Transport, Lysosomal	Transport
5THFtm	0	0.0821981	0.0410991	0	0.252351	0.126176	Transport, Mitochondrial	Transport
6DHFtl	0	0.0657585	0.0328792	0	0.201881	0.100941	Transport, Lysosomal	Transport
6DHFtm	0	0.0657585	0.0328792	0	0.201881	0.100941	Transport, Mitochondrial	Transport
6HTSTSTERONEte	0	0	0	0	0	0	Transport, Extracellular	Transport
6THFtl	0	0.0657585	0.0328792	0	0.201881	0.100941	Transport, Lysosomal	Transport
6THFtm	0	0.0657585	0.0328792	0	0.201881	0.100941	Transport, Mitochondrial	Transport
7DHCHSTEROLtr	0	0.0054876	0.0027438	0	0.016606	0.00830299	Transport, Endoplasmic Reticular	Transport
7DHFtl	0	0.0547987	0.0273994	0	0.168234	0.0841171	Transport, Lysosomal	Transport
7DHFtm	0	0.0547987	0.0273994	0	0.168234	0.0841171	Transport, Mitochondrial	Transport
7THFtl	0	0.0547987	0.0273994	0	0.168234	0.0841171	Transport, Lysosomal	Transport
7THFtm	0	0.0547987	0.0273994	0	0.168234	0.0841171	Transport, Mitochondrial	Transport
A_MANASE	0	0	0	0	0	0	N-Glycan Degradation	Glycosylation
A_MANASEly	0	0.0113377	0.00566884	0	0.0348071	0.0174035	N-Glycan Degradation	Glycosylation
A4GALTc	0	0	0	0	0	0	Sphingolipid Metabolism	Lipids
A4GALTg	0	0	0	0	0	0	Sphingolipid Metabolism	Lipids
AACOAT	-0.286367	0.274347	-0.00601	-0.590792	0.841171	0.12519	Propanoate Metabolism	FAS
ABO1g	0	0	0	0	0	0	Blood Group Biosynthesis	Heme
ABO2g	0	0	0	0	0	0	Blood Group Biosynthesis	Heme
ABO3g	0	0	0	0	0	0	Blood Group Biosynthesis	Heme
ABO4g	0	0	0	0	0	0	Blood Group Biosynthesis	Heme
ABO5g	0	0	0	0	0	0	Blood Group Biosynthesis	Heme
ABO6g	0	0	0	0	0	0	Blood Group Biosynthesis	Heme
ABO7g	0	0	0	0	0	0	Blood Group Biosynthesis	Heme
ABO8g	0	0	0	0	0	0	Blood Group Biosynthesis	Heme
ABO9g	0	0	0	0	0	0	Blood Group Biosynthesis	Heme
ABTArm	0	0.088466	0.044233	0	0.19489	0.0974452	Glutamate metabolism	Amino Acids
ABTD	-0.071116	0	-0.035558	-0.233329	0	-0.116665	Pentose and Glucuronate Interconversions	Central Metabolism
ABTti	0	0.071116	0.035558	0	0.233329	0.116665	Transport, Extracellular	Transport
ABUTD	0	0.088466	0.044233	0	0.196837	0.0984184	beta-Alanine metabolism	Amino Acids
ABUTt2r	0	0	0	0	0	0	Transport, Extracellular	Transport
ABUTt2rL	0	0	0	0	0	0	Transport, Lysosomal	Transport
ABUTt4(2)r	0	0	0	0	0	0	Transport, Extracellular	Transport
ACACT1	0	0.743713	0.371857	0	0.743713	0.371857	Cholesterol Metabolism	Steriods
ACACT10m	0	0	0	0	0	0	Valine, Leucine, and Isoleucine Metabolism	Amino Acids
ACACT1r	-1.01771	0.286367	-0.36567	-1.58488	0.590792	-0.497046	Tryptophan metabolism	Amino Acids
ACACT1rm	-0.267999	0.414542	0.0732713	-0.570373	0.976961	0.203294	Tryptophan metabolism	Amino Acids
ACACT1x	0	0	0	0	0	0	Cholesterol Metabolism	Steriods
ACACt2	-0.307198	0	-0.153599	-0.427535	0	-0.213767	Transport, Extracellular	Transport
ACACt2m	-0.379869	0.780072	0.200101	-0.942731	1.31389	0.185578	Transport, Mitochondrial	Transport
ACACT4p	0	0	0	0	0	0	Fatty Acid Metabolism	FAS
ACACT5p	0	0	0	0	0	0	Fatty Acid Metabolism	FAS
ACACT6p	0	0	0	0	0	0	Fatty Acid Metabolism	FAS
ACACT7p	0	0	0	0	0	0	Fatty Acid Metabolism	FAS
ACACT8p	0	0	0	0	0	0	Fatty Acid Metabolism	FAS
ACACT9p	0	0	0	0	0	0	Fatty Acid Metabolism	FAS
ACACtx	-0.565724	0	-0.282862	-1.14335	0	-0.571673	Transport, Peroxisomal	Transport
ACALDt	0	0	0	0	0	0	Transport, Extracellular	Transport
ACALDtm	0	0	0	0	0	0	Transport, Mitochondrial	Transport
ACALDtr	0	0	0	0	0	0	Transport, Endoplasmic Reticular	Transport
ACALDtx	0	0	0	0	0	0	Transport, Peroxisomal	Transport
ACCOAC	0	0.328792	0.164396	0	1.00941	0.504703	Fatty Acid Metabolism	FAS
ACCOACm	0	0.410991	0.205495	0	1.26176	0.630878	Fatty Acid Metabolism	FAS
ACCOAgt	0	0	0	0	0	0	Transport, Extracellular	Transport
ACCOAL	0	0	0	0	0	0	Propanoate Metabolism	FAS
ACCOALm	0	0	0	0	0	0	Propanoate Metabolism	FAS
ACCOAtn	0	0	0	0	0	0	Transport, Nuclear	Transport
ACCOAtr	0	0	0	0	0	0	Transport, Endoplasmic Reticular	Transport
ACETONEt2	-0.321398	0	-0.160699	-0.427535	0	-0.213767	Transport, Extracellular	Transport
ACETONEt2m	-0.321398	0	-0.160699	-0.427535	0	-0.213767	Transport, Mitochondrial	Transport
ACGAGBSIDEtg	0	0	0	0	0	0	Transport, Golgi Apparatus	Transport
ACGAGBSIDEtl	0	0	0	0	0	0	Transport, Lysosomal	Transport
ACGALFUCGALACGALFUC12GAL14ACGLCGALGLUSIDEte	0	0	0	0	0	0	Transport, Extracellular	Transport
ACGALFUCGALACGALFUC12GAL14ACGLCGALGLUSIDEtg	0	0	0	0	0	0	Transport, Golgi Apparatus	Transport
ACGALFUCGALACGALFUCGALACGLCGAL14ACGLCGALGLUSIDEte	0	0	0	0	0	0	Transport, Extracellular	Transport
ACGALFUCGALACGALFUCGALACGLCGAL14ACGLCGALGLUSIDEtg	0	0	0	0	0	0	Transport, Golgi Apparatus	Transport
ACGALtly	0	0	0	0	0	0	Transport, Lysosomal	Transport
ACGAM2E	0	0	0	0	0	0	Aminosugar Metabolism	Glycosylation
ACGAM6PSi	0	0.032142	0.016071	0	0.091628	0.045814	Aminosugar Metabolism	Glycosylation
ACGAMK	0	0.0694701	0.0347351	0	0.1991	0.0995499	Aminosugar Metabolism	Glycosylation
ACGAMPM	0	0.0694701	0.0347351	0	0.1991	0.0995499	Aminosugar Metabolism	Glycosylation
ACGAMtly	0	0.0694701	0.0347351	0	0.1991	0.0995499	Transport, Lysosomal	Transport
ACGPID	0	0	0	0	0	0	Glycosylphosphatidylinositol (GPI)-anchor biosynthesis	Glycosylation
ACHEe	0	0	0	0	0	0	Glycerophospholipid Metabolism	Lipids
ACHVESSEC	0	0	0	0	0	0	Transport, Extracellular	Transport
ACITL	0	0.552244	0.276122	0	1.07274	0.536372	Citric Acid Cycle	Central Metabolism
ACN13ACNGALGBSIDEte	0	0	0	0	0	0	Transport, Extracellular	Transport
ACN13ACNGALGBSIDEtg	0	0	0	0	0	0	Transport, Golgi Apparatus	Transport
ACN23ACNGALGBSIDEte	0	0	0	0	0	0	Transport, Extracellular	Transport
ACN23ACNGALGBSIDEtg	0	0	0	0	0	0	Transport, Golgi Apparatus	Transport
ACNACNGAL14ACGLCGALGLUSIDEte	0	0	0	0	0	0	Transport, Extracellular	Transport
ACNACNGAL14ACGLCGALGLUSIDEtg	0	0	0	0	0	0	Transport, Golgi Apparatus	Transport
ACNACNGALGBSIDEte	0	0	0	0	0	0	Transport, Extracellular	Transport
ACNACNGALGBSIDEtg	0	0	0	0	0	0	Transport, Golgi Apparatus	Transport
ACNAM9PL	0	0.164396	0.0821981	0	0.498825	0.249413	Aminosugar Metabolism	Glycosylation
ACNAM9PL2	0	0.0642839	0.032142	0	0.19756	0.0987801	Aminosugar Metabolism	Glycosylation
ACNAMlt	-0.00756134	0	-0.00378067	-0.0232136	0	-0.0116068	Transport, Lysosomal	Transport
ACNAMPH	0	0.164396	0.0821981	0	0.498825	0.249413	Aminosugar Metabolism	Glycosylation
ACNAMtn	0	0.00749242	0.00374621	0	0.023002	0.011501	Transport, Nuclear	Transport
ACNGALACGLCGAL14ACGLCGALGLUSIDEte	0	0	0	0	0	0	Transport, Extracellular	Transport
ACNGALACGLCGAL14ACGLCGALGLUSIDEtg	0	0	0	0	0	0	Transport, Golgi Apparatus	Transport
ACNMLr	0	0.164396	0.0821981	0	0.498825	0.249413	Aminosugar Metabolism	Glycosylation
ACOAD10m	0	0	0	0	0	0	Valine, Leucine, and Isoleucine Metabolism	Amino Acids
ACOAD1fm	0	0	0	0	0	0	Butanoate Metabolism	FAS
ACOAD8m	0	0.0205476	0.0102738	0	0.0236518	0.0118259	Valine, Leucine, and Isoleucine Metabolism	Amino Acids
ACOAD9m	0	0.000626959	0.00031348	0	0.000124224	6.21118e-05	Valine, Leucine, and Isoleucine Metabolism	Amino Acids
ACOAHi	0	0.281751	0.140876	0	0.705122	0.352561	Pyruvate Metabolism	Central Metabolism
ACOAO7p	0	0.205095	0.102547	0	0.576061	0.28803	Fatty Acid Metabolism	FAS
ACOATA	0	0	0	0	0	0	Fatty Acid Metabolism	FAS
ACODA	0	0	0	0	0	0	Urea cycle/amino group metabolism	Amino Acids
ACONT	0	0.821981	0.410991	0	2.52351	1.26176	Citric Acid Cycle	Central Metabolism
ACONTm	-0.792832	0.183149	-0.304841	-2.50895	0.269892	-1.11953	Citric Acid Cycle	Central Metabolism
ACOX22x	0	0	0	0	0	0	Bile Acid Biosynthesis	Steriods
ACOX2x	0	0	0	0	0	0	Bile Acid Biosynthesis	Steriods
ACP1(FMN)	0	0.328792	0.164396	0	1.00941	0.504703	Riboflavin Metabolism	Vitamins
ACRNtm	0	0.547987	0.273994	0	1.68234	0.841171	Transport, Mitochondrial	Transport
ACS	0	0.234852	0.117426	0	0.721004	0.360502	Glycolysis/Gluconeogenesis	Central Metabolism
ACS2	0	0	0	0	0	0	Propanoate Metabolism	FAS
ACSm	0	0.205495	0.102748	0	0.630878	0.315439	Glycolysis/Gluconeogenesis	Central Metabolism
ACt2m	0	0.205495	0.102748	0	0.630878	0.315439	Transport, Mitochondrial	Transport
ACt2r	-0.518135	0.164396	-0.176869	-0.832297	0.504703	-0.163797	Transport, Extracellular	Transport
ACtg	0	0	0	0	0	0	Transport, Golgi Apparatus	Transport
ACTLMO	0	0.0913312	0.0456656	0	0.280131	0.140065	Pyruvate Metabolism	Central Metabolism
ACTNMO	0	0.0861749	0.0430874	0	0.204171	0.102085	Pyruvate Metabolism	Central Metabolism
ACYP	0	0.328792	0.164396	0	1.00941	0.504703	Glycolysis/Gluconeogenesis	Central Metabolism
ADA	0	0.101372	0.0506862	0	0.260034	0.130017	Purine Catabolism	Nucleotides
ADAe	0	0.101372	0.0506862	0	0.260034	0.130017	Nucleotides	Nucleotides
ADCim	0	0.321398	0.160699	0	0.427535	0.213767	Propanoate Metabolism	FAS
ADEt	-0.0215302	0	-0.0107651	-0.0183256	0	-0.0091628	Transport, Extracellular	Transport
ADEtl	0	0	0	0	0	0	Transport, Lysosomal	Transport
ADHAPtx	0	0	0	0	0	0	Transport, Peroxisomal	Transport
ADK1	0.0855113	0.0625147	0.074013	0.153805	0.225234	0.189519	Nucleotides	Nucleotides
ADK1m	0	0	0	0	0	0	Nucleotides	Nucleotides
ADK3	-0.0234242	-0.00189399	-0.0126591	-0.0283321	-0.022224	-0.025278	Nucleotides	Nucleotides
ADK3m	0	0	0	0	0	0	Nucleotides	Nucleotides
ADKd	0	0.0197826	0.00989129	0	0.0183256	0.0091628	Nucleotides	Nucleotides
ADMDC	0	0	0	0	0	0	Arginine and Proline Metabolism	Amino Acids
ADNCYC	0	0.164396	0.0821981	0	0.504703	0.252351	Nucleotides	Nucleotides
ADNK1	0	0.331645	0.165822	0	1.01262	0.506309	Nucleotides	Nucleotides
ADNK1m	0	0.0274619	0.013731	0	0.045814	0.022907	Nucleotides	Nucleotides
ADNt	-0.00197491	0	-0.000987453	-0.0284525	0	-0.0142263	Transport, Extracellular	Transport
ADNt4	0	0	0	0	0	0	Transport, Extracellular	Transport
ADNt5	0	0	0	0	0	0	Transport, Extracellular	Transport
ADNtl	0	0	0	0	0	0	Transport, Lysosomal	Transport
ADNtm	0	0.0274619	0.013731	0	0.045814	0.022907	Transport, Mitochondrial	Transport
ADPGLC	0	0	0	0	0	0	Nucleotides	Nucleotides
ADPMAN	0	0	0	0	0	0	Nucleotides	Nucleotides
ADPRDP	0	0.109597	0.0547987	0	0.336468	0.168234	Nucleotides	Nucleotides
ADPRDPm	0	0	0	0	0	0	Nucleotides	Nucleotides
ADPRIBt	0	0	0	0	0	0	Transport, Extracellular	Transport
ADPT	0	0.165822	0.0829112	0	0.506309	0.253154	Salvage Pathway	Nucleotides
ADPtx	-0.108948	-0.0101708	-0.0595592	-0.298908	0	-0.149454	Transport, Peroxisomal	Transport
ADRNCOAtx	0	0	0	0	0	0	Transport, Peroxisomal	Transport
ADRNCPT1	0	0	0	0	0	0	Carnitine shuttle	FAS
ADRNCPT2	0	0	0	0	0	0	Carnitine shuttle	FAS
ADRNCRNt	0	0	0	0	0	0	Carnitine shuttle	FAS
ADRNLPVESSEC	0	0	0	0	0	0	Transport, Extracellular	Transport
ADRNt	0	0	0	0	0	0	Transport, Extracellular	Transport
ADSELK	0	0	0	0	0	0	Selenoamino acid metabolism	Amino Acids
ADSK	0	0.328792	0.164396	0	1.00941	0.504703	Nucleotides	Nucleotides
ADSL1	0.00189399	0.194127	0.0980104	0.00490961	0.499878	0.252394	Nucleotides	Nucleotides
ADSL2	0.00347723	0.03039	0.0169336	0.0100065	0.0329135	0.02146	IMP Biosynthesis	Nucleotides
ADSS	0.00189399	0.194127	0.0980104	0.00490961	0.499878	0.252394	Nucleotides	Nucleotides
AFLATOXINte	0	0	0	0	0	0	Transport, Extracellular	Transport
AG13T10g	0	0	0	0	0	0	Keratan sulfate biosynthesis	Glycosylation
AG13T11g	0	0	0	0	0	0	Keratan sulfate biosynthesis	Glycosylation
AG13T12g	0	0	0	0	0	0	Keratan sulfate biosynthesis	Glycosylation
AG13T13g	0	0	0	0	0	0	Keratan sulfate biosynthesis	Glycosylation
AG13T14g	0	0	0	0	0	0	Keratan sulfate biosynthesis	Glycosylation
AG13T15g	0	0	0	0	0	0	Keratan sulfate biosynthesis	Glycosylation
AG13T16g	0	0	0	0	0	0	Keratan sulfate biosynthesis	Glycosylation
AG13T17g	0	0	0	0	0	0	Keratan sulfate biosynthesis	Glycosylation
AG13T18g	0	0	0	0	0	0	Keratan sulfate biosynthesis	Glycosylation
AG13T1g	0	0.00756134	0.00378067	0	0.0232136	0.0116068	Keratan sulfate biosynthesis	Glycosylation
AG13T2g	0	0.00756134	0.00378067	0	0.0232136	0.0116068	Keratan sulfate biosynthesis	Glycosylation
AG13T3g	0	0.00756134	0.00378067	0	0.0232136	0.0116068	Keratan sulfate biosynthesis	Glycosylation
AG13T4g	0	0	0	0	0	0	Keratan sulfate biosynthesis	Glycosylation
AG13T5g	0	0	0	0	0	0	Keratan sulfate biosynthesis	Glycosylation
AG13T6g	0	0	0	0	0	0	Keratan sulfate biosynthesis	Glycosylation
AG13T7g	0	0	0	0	0	0	Keratan sulfate biosynthesis	Glycosylation
AG13T8g	0	0	0	0	0	0	Keratan sulfate biosynthesis	Glycosylation
AG13T9g	0	0	0	0	0	0	Keratan sulfate biosynthesis	Glycosylation
AGLPC	0	0	0	0	0	0	Glycerophospholipid Metabolism	Lipids
AGLPED	0	0	0	0	0	0	Glycerophospholipid Metabolism	Lipids
AGLPET	0	0	0	0	0	0	Glycerophospholipid Metabolism	Lipids
AGLPH	0	0	0	0	0	0	Glycerophospholipid Metabolism	Lipids
AGLPR	0	0	0	0	0	0	Glycerophospholipid Metabolism	Lipids
AGLPT	0	0	0	0	0	0	Glycerophospholipid Metabolism	Lipids
AGMTm	0	0	0	0	0	0	Arginine and Proline Metabolism	Amino Acids
AGPAT1	0.00196336	0.147608	0.0747857	0	0	0	Triacylglycerol Synthesis	Lipids
AGPex	0	0	0	0	0	0	Transport, Peroxisomal	Transport
AGPRim	0	0	0	0	0	0	Urea cycle/amino group metabolism	Amino Acids
AGPSx	0	0	0	0	0	0	Glycerophospholipid Metabolism	Lipids
AHANDROSTANGLCte	0	0	0	0	0	0	Transport, Extracellular	Transport
AHANDROSTANGLCtr	0	0	0	0	0	0	Transport, Endoplasmic Reticular	Transport
AHC	0.0034326	0.0867121	0.0450723	0.0032122	0.249478	0.126345	Methionine Metabolism	Amino Acids
AHCYStn	0	0	0	0	0	0	Transport, Nuclear	Transport
AHCYStr	-0.0867121	0	-0.043356	-0.249478	0	-0.124739	Transport, Endoplasmic Reticular	Transport
AHEXASE2ly	0	0.0113377	0.00566884	0	0.0348071	0.0174035	N-Glycan Degradation	Glycosylation
AHEXASEly	0	0	0	0	0	0	N-Glycan Degradation	Glycosylation
AICART	0.00347723	0.03039	0.0169336	0.0100065	0.0329135	0.02146	IMP Biosynthesis	Nucleotides
AIRCr	0.00347723	0.03039	0.0169336	0.0100065	0.0329135	0.02146	IMP Biosynthesis	Nucleotides
AK2LGCHOLt	0	0.281751	0.140876	0	0.705122	0.352561	Transport, Extracellular	Transport
AKGDm	0	0.201454	0.100727	0	0.260238	0.130119	Citric Acid Cycle	Central Metabolism
AKGMALtm	-0.59204	0.217983	-0.187028	-1.38765	0.107372	-0.64014	Transport, Mitochondrial	Transport
AKGt4_3	-0.215523	0	-0.107762	-0.296921	0	-0.148461	Transport, Extracellular	Transport
AKGtp	0	0	0	0	0	0	Transport, Peroxisomal	Transport
AKR1C41	0	0	0	0	0	0	Bile Acid Biosynthesis	Steriods
AKR1C42	0	0	0	0	0	0	Bile Acid Biosynthesis	Steriods
ALAASNNaEx	0	0	0	0	0	0	Transport, Extracellular	Transport
ALACYSNaEx	0	0	0	0	0	0	Transport, Extracellular	Transport
ALADGLNexR	0	0	0	-0.0408594	0	-0.0204297	Transport, Extracellular	Transport
ALADGLYexR	-0.0317661	0	-0.015883	0	0	0	Transport, Extracellular	Transport
ALAGLNexR	0	0	0	0	0	0	Transport, Extracellular	Transport
ALAGLNNaEx	0	0	0	0	0	0	Transport, Extracellular	Transport
ALAGLYexR	0	0	0	0	0	0	Transport, Extracellular	Transport
ALAR	0	0.1989	0.0994498	0	0.199221	0.0996106	Alanine and Aspartate Metabolism	Amino Acids
ALASERNaEx	0	0	0	0	0	0	Transport, Extracellular	Transport
ALASm	0	0	0	0	0	0	Glycine, Serine, and Threonine Metabolism	Amino Acids
ALAt2r	0	0	0	0	0	0	Transport, Extracellular	Transport
ALAt2rL	0	0	0	0	0	0	Transport, Lysosomal	Transport
ALAt4	0	0	0	0	0	0	Transport, Extracellular	Transport
ALATA_L	-0.209605	-0.0107053	-0.110155	-0.209605	-0.0103838	-0.109994	Glutamate metabolism	Amino Acids
ALATHRNaEx	0	0	0	0	0	0	Transport, Extracellular	Transport
ALAtN1	-0.0969951	0	-0.0484975	-0.078661	0	-0.0393305	Transport, Extracellular	Transport
ALCD1	-0.159658	0	-0.0798291	-0.45505	0	-0.227525	Miscellaneous	Misc
ALCD21_D	0	0	0	0	0	0	Pyruvate Metabolism	Central Metabolism
ALCD21_L	0	0	0	0	0	0	Pyruvate Metabolism	Central Metabolism
ALCD22_D	0	0	0	0	0	0	Pyruvate Metabolism	Central Metabolism
ALCD22_L	0	0.0155839	0.00779197	0	0.00514336	0.00257168	Pyruvate Metabolism	Central Metabolism
ALCD2yf	0	0	0	0	0	0	Glycolysis/Gluconeogenesis	Central Metabolism
ALDD20x	0	0	0	0	0	0	Tryptophan metabolism	Amino Acids
ALDD20xm	0	0	0	0	0	0	Tryptophan metabolism	Amino Acids
ALDD21	0	0	0	0	0	0	Fatty Acid Metabolism	FAS
ALDD2x	0	0	0	0	0	0	Glycolysis/Gluconeogenesis	Central Metabolism
ALDD2xm	0	0	0	0	0	0	Glycolysis/Gluconeogenesis	Central Metabolism
ALDD2y	0	0	0	0	0	0	Glycolysis/Gluconeogenesis	Central Metabolism
ALDSTRNte	0	0	0	0	0	0	Transport, Extracellular	Transport
ALKP	0	0	0	0	0	0	Glycerophospholipid Metabolism	Lipids
ALOX12	0	0	0	0	0	0	Eicosanoid Metabolism	UFAS
ALOX12R	0	0	0	0	0	0	Eicosanoid Metabolism	UFAS
ALOX15	0	0	0	0	0	0	Eicosanoid Metabolism	UFAS
ALOX5	0	0	0	0	0	0	Eicosanoid Metabolism	UFAS
ALOX52	0	0	0	0	0	0	Eicosanoid Metabolism	UFAS
ALR	0	0.164396	0.0821981	0	0.498825	0.249413	Glycine, Serine, and Threonine Metabolism	Amino Acids
ALR2	0	0	0	0	0	0	Pyruvate Metabolism	Central Metabolism
ALR3	0	0.0734082	0.0367041	0	0.0163324	0.00816622	Pyruvate Metabolism	Central Metabolism
AM6SAD	0	0	0	0	0	0	Tryptophan metabolism	Amino Acids
AMACR2p	0	0	0	0	0	0	Bile Acid Biosynthesis	Steriods
AMACR2r	0	0	0	0	0	0	Bile Acid Biosynthesis	Steriods
AMACRp	0	0	0	0	0	0	Bile Acid Biosynthesis	Steriods
AMACRr	0	0	0	0	0	0	Bile Acid Biosynthesis	Steriods
AMANK	0	0.164396	0.0821981	0	0.498825	0.249413	Aminosugar Metabolism	Glycosylation
AMCOXO	0	0	0	0	0	0	Tryptophan metabolism	Amino Acids
AMETr	0	0.0867121	0.043356	0	0.249478	0.124739	Transport, Endoplasmic Reticular	Transport
AMETt2m	0	0.0767128	0.0383564	0	0.222195	0.111098	Transport, Mitochondrial	Transport
AMETtn	0	0	0	0	0	0	Transport, Nuclear	Transport
AMPDA	0	0.192233	0.0961164	0	0.494969	0.247484	Nucleotides	Nucleotides
AMPTASECG	0	0.110179	0.0550894	0	0.336974	0.168487	Glutathione Metabolism	ROS
AMPTASECGe	0	0.110179	0.0550894	0	0.336974	0.168487	Glutathione Metabolism	ROS
AMPtp	0	0	0	0	0	0	Transport, Peroxisomal	Transport
AMPtr	0	0	0	0	0	0	Transport, Endoplasmic Reticular	Transport
AMY1e	0	0	0	0	0	0	Starch and Sucrose Metabolism	Glycogen
AMY2e	0	0	0	0	0	0	Starch and Sucrose Metabolism	Glycogen
ANDRSTRNGLCte	0	0	0	0	0	0	Transport, Extracellular	Transport
ANDRSTRNGLCtr	0	0	0	0	0	0	Transport, Endoplasmic Reticular	Transport
ANDRSTRNte	0	0	0	0	0	0	Transport, Extracellular	Transport
ANDRSTRNtr	0	0	0	0	0	0	Transport, Endoplasmic Reticular	Transport
AP4AH1	0	0	0	0	0	0	Nucleotides	Nucleotides
APAT2rm	0	0	0	0	0	0	beta-Alanine metabolism	Amino Acids
APRTO2	0	0	0	0	0	0	Arginine and Proline Metabolism	Amino Acids
AQCOBALt	0	0	0	0	0	0	Transport, Extracellular	Transport
ARAB-Lt	0	0	0	0	0	0	Transport, Extracellular	Transport
ARABR	0	0	0	0	0	0	Pentose and Glucuronate Interconversions	Central Metabolism
ARACHCOAtx	0	0	0	0	0	0	Transport, Peroxisomal	Transport
ARACHCPT1	0	0	0	0	0	0	Carnitine shuttle	FAS
ARACHCPT2	0	0	0	0	0	0	Carnitine shuttle	FAS
ARACHCRNt	0	0	0	0	0	0	Carnitine shuttle	FAS
ARACHDCOAtx	0	0	0	0	0	0	Transport, Peroxisomal	Transport
ARACHDt2	0	0	0	0	0	0	Transport, Extracellular	Transport
ARACHDtr	0	0	0	0	0	0	Transport, Endoplasmic Reticular	Transport
ARACHt	0	0	0	0	0	0	Transport, Extracellular	Transport
ARGDCm	0	0	0	0	0	0	Arginine and Proline Metabolism	Amino Acids
ARGLYSex	0	0.02375	0.011875	0	0.02375	0.011875	Transport, Extracellular	Transport
ARGN	0	0.0687824	0.0343912	0	0.0622246	0.0311123	Urea cycle/amino group metabolism	Amino Acids
ARGNm	0	0.0687824	0.0343912	0	0.0622246	0.0311123	Urea cycle/amino group metabolism	Amino Acids
ARGSL	0	0.0608228	0.0304114	0	0.091628	0.045814	Alanine and Aspartate Metabolism	Amino Acids
ARGSS	0	0.0608228	0.0304114	0	0.091628	0.045814	Alanine and Aspartate Metabolism	Amino Acids
ARGt4	0	0.02375	0.011875	0	0.02375	0.011875	Transport, Extracellular	Transport
ARGtiDF	0	0.02375	0.011875	0	0.02375	0.011875	Transport, Extracellular	Transport
ARGtm	0	0.0687824	0.0343912	0	0.0622246	0.0311123	Transport, Mitochondrial	Transport
ARSA	0	0	0	0	0	0	Sphingolipid Metabolism	Lipids
ARTCOAL1	-0.169891	0.000561625	-0.0846646	-0.25351	0	-0.126755	R Group Synthesis	Central Metabolism
ARTCOAL2	-0.170022	0.00224532	-0.0838882	-0.25351	0	-0.126755	R Group Synthesis	Central Metabolism
ARTCOAL3	-0.170022	0	-0.0850109	-0.25351	0	-0.126755	R Group Synthesis	Central Metabolism
ARTFR11	0	0	0	0	0	0	R Group Synthesis	Central Metabolism
ARTFR12	0	0.102547	0.0512737	0	0.28803	0.144015	R Group Synthesis	Central Metabolism
ARTFR13	0	0.0891302	0.0445651	0	0.143094	0.0715471	R Group Synthesis	Central Metabolism
ARTFR202	0	0	0	0	0	0	R Group Synthesis	Central Metabolism
ARTFR203	0	0	0	0	0	0	R Group Synthesis	Central Metabolism
ARTFR204	0	0	0	0	0	0	R Group Synthesis	Central Metabolism
ARTFR205	0	0	0	0	0	0	R Group Synthesis	Central Metabolism
ARTFR206	0	0	0	0	0	0	R Group Synthesis	Central Metabolism
ARTFR207	0	0	0	0	0	0	R Group Synthesis	Central Metabolism
ARTFR208	0	0	0	0	0	0	R Group Synthesis	Central Metabolism
ARTFR209	0	0	0	0	0	0	R Group Synthesis	Central Metabolism
ARTFR210	0	0	0	0	0	0	R Group Synthesis	Central Metabolism
ARTFR211	0	0	0	0	0	0	R Group Synthesis	Central Metabolism
ARTFR212	0	0	0	0	0	0	R Group Synthesis	Central Metabolism
ARTFR213	0	0	0	0	0	0	R Group Synthesis	Central Metabolism
ARTFR31	0	0.0861442	0.0430721	0	0.142286	0.0711432	R Group Synthesis	Central Metabolism
ARTFR32	0	0.0588061	0.029403	0	0.121976	0.0609879	R Group Synthesis	Central Metabolism
ARTFR33	0	0.0488447	0.0244223	0	0.118033	0.0590165	R Group Synthesis	Central Metabolism
ARTFR34	0	0.0410373	0.0205187	0	0.103653	0.0518264	R Group Synthesis	Central Metabolism
ARTFR41	0	0.102547	0.0512737	0	0.28803	0.144015	R Group Synthesis	Central Metabolism
ARTFR42	0	0.0588061	0.029403	0	0.121976	0.0609879	R Group Synthesis	Central Metabolism
ARTFR43	0	0.0488447	0.0244223	0	0.118033	0.0590165	R Group Synthesis	Central Metabolism
ARTFR44	0	0.0410373	0.0205187	0	0.103653	0.0518264	R Group Synthesis	Central Metabolism
ARTFR45	0	0	0	0	0	0	R Group Synthesis	Central Metabolism
ARTFR46	0	0.0488447	0.0244223	0	0.118033	0.0590165	R Group Synthesis	Central Metabolism
ARTFR61	0	0.205095	0.102547	0	0.576061	0.28803	R Group Synthesis	Central Metabolism
ARTPLM1	-0.0837526	0.207486	0.0618669	-0.142286	0.576061	0.216887	R Group Synthesis	Central Metabolism
ARTPLM1m	0	0.0740729	0.0370364	0	0.130389	0.0651946	R Group Synthesis	Central Metabolism
ARTPLM2	-0.172867	-0.00196336	-0.087415	-0.261805	0	-0.130902	R Group Synthesis	Central Metabolism
ARTPLM2m	0	0.0740729	0.0370364	0	0.130389	0.0651946	R Group Synthesis	Central Metabolism
ARTPLM3	-0.170977	-7.40336e-05	-0.0855257	-0.261805	0	-0.130902	R Group Synthesis	Central Metabolism
ARTPLM3m	0	0.0740729	0.0370364	0	0.130389	0.0651946	R Group Synthesis	Central Metabolism
ASAH1	0	0.0320723	0.0160361	0	0.0894517	0.0447259	Sphingolipid Metabolism	Lipids
ASCBOX	0	0.410991	0.205495	0	0.606733	0.303366	Ascorbate and Aldarate Metabolism	Vitamins
ASCBt	0	0	0	0	0	0	Transport, Extracellular	Transport
ASCBt4	0	0	0	0	0	0	Transport, Extracellular	Transport
Asn-X-Ser/Thrtr	-0.0113377	0	-0.00566884	-0.0348071	0	-0.0174035	Transport, Endoplasmic Reticular	Transport
ASNALANaEx	0	0	0	0	0	0	Transport, Extracellular	Transport
ASNCYSNaEx	0	0	0	0	0	0	Transport, Extracellular	Transport
ASNGLNNaEx	0	0	0	0	0	0	Transport, Extracellular	Transport
ASNNm	0	0.101104	0.050552	0	0.247479	0.12374	Alanine and Aspartate Metabolism	Amino Acids
ASNS1	0.00581505	0.107151	0.0564829	0.00391304	0.251392	0.127653	Alanine and Aspartate Metabolism	Amino Acids
ASNSERNaEx	0	0	0	0	0	0	Transport, Extracellular	Transport
ASNt4	0	0	0	0	0	0	Transport, Extracellular	Transport
ASNTHRNaEx	0	0	0	0	0	0	Transport, Extracellular	Transport
ASNtm	0	0.101104	0.050552	0	0.247479	0.12374	Transport, Mitochondrial	Transport
ASNtN1	-0.0232501	0	-0.011625	-0.0202093	0	-0.0101047	Transport, Extracellular	Transport
ASPCTr	0.00336987	0.0571578	0.0302639	0.0100065	0.0558205	0.0329135	Pyrimidine Biosynthesis	Nucleotides
ASPDt6	0	0	0	0	0	0	Transport, Extracellular	Transport
ASPDxt	0	0	0	0	0	0	Transport, Peroxisomal	Transport
ASPGLUm	-0.50816	1.10789	0.299867	-1.28462	2.88794	0.80166	Transport, Mitochondrial	Transport
ASPt6	0	0	0	0	0	0	Transport, Extracellular	Transport
ASPTA	-0.53035	1.0857	0.277677	-1.31957	2.85299	0.766708	Alanine and Aspartate Metabolism	Amino Acids
ASPTAm	-1.10789	0.50816	-0.299867	-2.88794	1.28462	-0.80166	Alanine and Aspartate Metabolism	Amino Acids
ATP1ter	0	0	0	0	0	0	Transport, Endoplasmic Reticular	Transport
ATP2ter	0	0	0	0	0	0	Transport, Endoplasmic Reticular	Transport
ATPasel	0	0.0173658	0.0086829	0	0.0497749	0.0248875	Transport, Lysosomal	Transport
ATPH1e	0	0	0	0	0	0	Nucleotides	Nucleotides
ATPH2e	0	0	0	0	0	0	Nucleotides	Nucleotides
ATPS4m	0.717508	1.19593	0.95672	0.0648049	1.38213	0.723468	Oxidative Phosphorylation	Central Metabolism
ATPtm	0	1.24259	0.621297	0	1.23787	0.618936	Transport, Mitochondrial	Transport
ATPtn	0	0.460203	0.230102	0	0.893953	0.446976	Transport, Nuclear	Transport
ATPtx	0.0101708	0.108948	0.0595592	0	0.298908	0.149454	Transport, Peroxisomal	Transport
AVITE1t	0	0	0	0	0	0	Transport, Extracellular	Transport
AVITE2t	0	0	0	0	0	0	Transport, Extracellular	Transport
B_MANNASEly	0	0.0113377	0.00566884	0	0.0348071	0.0174035	N-Glycan Degradation	Glycosylation
B3GALT3g	0	0	0	0	0	0	Sphingolipid Metabolism	Lipids
B3GALT41g	0	0	0	0	0	0	Sphingolipid Metabolism	Lipids
B3GALT42g	0	0	0	0	0	0	Sphingolipid Metabolism	Lipids
B3GALT43g	0	0	0	0	0	0	Sphingolipid Metabolism	Lipids
B3GALT44g	0	0	0	0	0	0	Sphingolipid Metabolism	Lipids
B3GNT11g	0	0	0	0	0	0	Blood Group Biosynthesis	Heme
B3GNT12g	0	0	0	0	0	0	Blood Group Biosynthesis	Heme
B3GNT51g	0	0	0	0	0	0	Blood Group Biosynthesis	Heme
BALAtmr	0	0	0	0	0	0	Transport, Mitochondrial	Transport
BALAVECSEC	0	0	0	0	0	0	Transport, Extracellular	Transport
BAMPPALDOX	0	0	0	0	0	0	beta-Alanine metabolism	Amino Acids
BAMPPALDOXm	0	0	0	0	0	0	beta-Alanine metabolism	Amino Acids
BBHOX	0	0	0	0	0	0	Lysine Metabolism	Amino Acids
BDHm	-0.385144	0	-0.192572	-0.591715	0	-0.295858	Butanoate Metabolism	FAS
BDMT_L	0	0.0113377	0.00566884	0	0.0348071	0.0174035	N-Glycan Biosynthesis	Glycosylation
BDMT_U	0	0.0113377	0.00566884	0	0.0348071	0.0174035	N-Glycan Biosynthesis	Glycosylation
BETALDHx	0	0	0	0	0	0	Glycine, Serine, and Threonine Metabolism	Amino Acids
BETALDHxm	0	0.0262582	0.0131291	0	0.0775663	0.0387831	Glycine, Serine, and Threonine Metabolism	Amino Acids
BHBt	-0.385144	0	-0.192572	-0.591715	0	-0.295858	Transport, Extracellular	Transport
BHBtm	-0.385144	0	-0.192572	-0.591715	0	-0.295858	Transport, Mitochondrial	Transport
BILDGLCURt	0	0.328792	0.164396	0	1.00941	0.504703	Transport, Extracellular	Transport
BILDGLCURte	0	0.328792	0.164396	0	1.00941	0.504703	Transport, Extracellular	Transport
BILDGLCURtr	0	0	0	0	0	0	Transport, Endoplasmic Reticular	Transport
BILGLCURt	0	0.328792	0.164396	0	1.00941	0.504703	Transport, Extracellular	Transport
BILGLCURte	0	0.328792	0.164396	0	1.00941	0.504703	Transport, Extracellular	Transport
BILGLCURtr	0	0	0	0	0	0	Transport, Endoplasmic Reticular	Transport
BILIRED	0	0	0	0	0	0	Heme Degradation	Heme
BILIRUBt2	0	0	0	0	0	0	Transport, Extracellular	Transport
BILIRUBtr	0	0	0	0	0	0	Transport, Endoplasmic Reticular	Transport
BIOCYTtn	0	0	0	0	0	0	Transport, Nuclear	Transport
biomass	0.0269955	0.0269955	0.0269955	0	0	0	Objective	Objective
BMTer_L	0	0	0	0	0	0	Glycosylphosphatidylinositol (GPI)-anchor biosynthesis	Glycosylation
BMTer_U	0	0	0	0	0	0	Glycosylphosphatidylinositol (GPI)-anchor biosynthesis	Glycosylation
BPNT	0	0.109597	0.0547987	0	0.336468	0.168234	Nucleotides	Nucleotides
BPNT2	0	0.328792	0.164396	0	1.00941	0.504703	Nucleotides	Nucleotides
BTND1	0	0	0	0	0	0	Biotin Metabolism	Vitamins
BTND1n	0	0	0	0	0	0	Biotin Metabolism	Vitamins
BTNDe	0	0	0	0	0	0	Biotin Metabolism	Vitamins
BTNDm	0	0	0	0	0	0	Biotin Metabolism	Vitamins
BTNPL	0	0	0	0	0	0	Biotin Metabolism	Vitamins
BTNPLm	0	0	0	0	0	0	Biotin Metabolism	Vitamins
BTNt2	-0.0626373	0	-0.0313187	-0.0486723	0	-0.0243361	Transport, Extracellular	Transport
BTNt2m	0	0	0	0	0	0	Transport, Mitochondrial	Transport
BTNt3i	0	0.328792	0.164396	0	1.00941	0.504703	Transport, Extracellular	Transport
BTNt4i	0	0	0	0	0	0	Transport, Extracellular	Transport
BTNtn	0	0	0	0	0	0	Transport, Nuclear	Transport
BUTt2m	0	0	0	0	0	0	Transport, Mitochondrial	Transport
BUTt2r	0	0	0	0	0	0	Transport, Extracellular	Transport
BVITEt	0	0	0	0	0	0	Transport, Extracellular	Transport
BZt	0	0	0	0	0	0	Transport, Extracellular	Transport
BZtr	0	0	0	0	0	0	Transport, Endoplasmic Reticular	Transport
C14STRr	0.000565042	0.00605264	0.00330884	0	0.016606	0.00830299	Cholesterol Metabolism	Steriods
C160CPT1	0	0.0399866	0.0199933	0	0.0399866	0.0199933	Carnitine shuttle	FAS
C160CPT2	0	0.0399866	0.0199933	0	0.0399866	0.0199933	Carnitine shuttle	FAS
C160CRNt	0	0.0399866	0.0199933	0	0.0399866	0.0199933	Carnitine shuttle	FAS
C161CPT1	0	0.0399866	0.0199933	0	0.0399866	0.0199933	Carnitine shuttle	FAS
C161CPT12	0	0.0399866	0.0199933	0	0.0399866	0.0199933	Carnitine shuttle	FAS
C161CPT2	0	0.0399866	0.0199933	0	0.0399866	0.0199933	Carnitine shuttle	FAS
C161CPT22	0	0.0399866	0.0199933	0	0.0399866	0.0199933	Carnitine shuttle	FAS
C161CRN2t	0	0.0399866	0.0199933	0	0.0399866	0.0199933	Carnitine shuttle	FAS
C161CRNt	0	0.0399866	0.0199933	0	0.0399866	0.0199933	Carnitine shuttle	FAS
C180CPT1	0	0.0644223	0.0322111	0	0.11409	0.0570452	Carnitine shuttle	FAS
C180CPT2	0	0.0644223	0.0322111	0	0.11409	0.0570452	Carnitine shuttle	FAS
C180CRNt	0	0.0644223	0.0322111	0	0.11409	0.0570452	Carnitine shuttle	FAS
C181CPT1	0	0.0526093	0.0263047	0	0.103547	0.0517735	Carnitine shuttle	FAS
C181CPT2	0	0.0526093	0.0263047	0	0.103547	0.0517735	Carnitine shuttle	FAS
C181CRNt	0	0.0526093	0.0263047	0	0.103547	0.0517735	Carnitine shuttle	FAS
C204CPT1	0	0	0	0	0	0	Carnitine shuttle	FAS
C204CPT2	0	0	0	0	0	0	Carnitine shuttle	FAS
C204CRNt	0	0	0	0	0	0	Carnitine shuttle	FAS
C226COAtx	0	0	0	0	0	0	Transport, Peroxisomal	Transport
C226CPT1	0	0	0	0	0	0	Carnitine shuttle	FAS
C226CPT2	0	0	0	0	0	0	Carnitine shuttle	FAS
C226CRNt	0	0	0	0	0	0	Carnitine shuttle	FAS
C2M26DCOAHLm	0	0	0	0	0	0	Limonene and pinene degradation	Misc
C2M26DCOAHLx	0	0	0	0	0	0	Limonene and pinene degradation	Misc
C3STDH1Pr	0	0.00605264	0.00302632	0	0.016606	0.00830299	Cholesterol Metabolism	Steriods
C3STDH1r	0	0.00605264	0.00302632	0	0.016606	0.00830299	Cholesterol Metabolism	Steriods
C3STKR2r	0.000565042	0.00605264	0.00330884	0	0.016606	0.00830299	Cholesterol Metabolism	Steriods
C4STMO1r	0.000565042	0.00605264	0.00330884	0	0.016606	0.00830299	Cholesterol Metabolism	Steriods
C4STMO2Pr	0	0.00605264	0.00302632	0	0.016606	0.00830299	Cholesterol Metabolism	Steriods
C4STMO2r	0	0.00605264	0.00302632	0	0.016606	0.00830299	Cholesterol Metabolism	Steriods
CAATPS	0	0.328792	0.164396	0	1.00941	0.504703	Transport, Extracellular	Transport
CAMPt	0	0.0214326	0.0107163	0	0.0183256	0.0091628	Transport, Extracellular	Transport
CAT2p	0	0	0	0	0	0	Glycolysis/Gluconeogenesis	Central Metabolism
CAt7r	0	0	0	0	0	0	Transport, Extracellular	Transport
CATm	0	0.616486	0.308243	0	0.910099	0.45505	ROS Detoxification	ROS
CATp	0	0.616486	0.308243	0	0.910099	0.45505	Miscellaneous	Misc
CBL2OR	0	0	0	0	0	0	Vitamin B12 Metabolism	Vitamins
CBL2tm	0	0	0	0	0	0	Transport, Mitochondrial	Transport
CBLATm	0	0	0	0	0	0	Vitamin B12 Metabolism	Vitamins
CBPPer	0	0	0	0	0	0	Glycolysis/Gluconeogenesis	Central Metabolism
CBPS	0.00336987	0.0571578	0.0302639	0.0100065	0.0558205	0.0329135	Pyrimidine Biosynthesis	Nucleotides
CBPSam	0	0.0538255	0.0269128	0	0.045814	0.022907	Glutamate metabolism	Amino Acids
CBPter	0	0	0	0	0	0	Transport, Endoplasmic Reticular	Transport
CBR1	0	0	0	0	0	0	Eicosanoid Metabolism	UFAS
CBR2	0	0	0	0	0	0	Eicosanoid Metabolism	UFAS
CCA_D3t	0	0	0	0	0	0	Transport, Extracellular	Transport
CDIPTr	0.000101009	0.109699	0.0548998	0	0.336468	0.168234	Glycerophospholipid Metabolism	Lipids
CDPDAGtm	-0.0192035	0	-0.00960173	-0.055871	0	-0.0279355	Transport, Mitochondrial	Transport
CDS	0	0.109939	0.0549696	0	0.336468	0.168234	Glycerophospholipid Metabolism	Lipids
CDSm	0	0.0192035	0.00960173	0	0.055871	0.0279355	Glycerophospholipid Metabolism	Lipids
CEPTC	0	0.166166	0.083083	0	0.504703	0.252351	Glycerophospholipid Metabolism	Lipids
CEPTE	0	0.166101	0.0830503	0	0.504703	0.252351	Glycerophospholipid Metabolism	Lipids
CERK	0	0.0549312	0.0274656	0	0.091628	0.045814	Sphingolipid Metabolism	Lipids
CERT1gt	-0.164396	0	-0.0821981	-0.504703	0	-0.252351	Transport, Golgi Apparatus	Transport
CERT1rt	0	0.109597	0.0547987	0	0.336468	0.168234	Transport, Endoplasmic Reticular	Transport
CERT2gt	0	0	0	0	0	0	Transport, Golgi Apparatus	Transport
CERT2rt	-0.109597	0	-0.0547987	-0.336468	0	-0.168234	Transport, Endoplasmic Reticular	Transport
CGLYt3(2)	0	0.110179	0.0550894	0	0.336974	0.168487	Transport, Extracellular	Transport
CGMPt	0	0.0206424	0.0103212	0	0.0183256	0.0091628	Transport, Extracellular	Transport
CHLP	0	0.328792	0.164396	0	1.00941	0.504703	Objective	Objective
CHLPCTD	0	0.166166	0.083083	0	0.504703	0.252351	Glycerophospholipid Metabolism	Lipids
CHLtm	-0.0192035	0.0262582	0.00352739	-0.055871	0.0775663	0.0108476	Glycerophospholipid Metabolism	Lipids
CHOLATEt	0	0	0	0	0	0	Transport, Mitochondrial	Transport
CHOLATEt2	0	0	0	0	0	0	Transport, Extracellular	Transport
CHOLD2m	0	0.0262582	0.0131291	0	0.0775663	0.0387831	Transport, Extracellular	Transport
CHOLK	0	0.330431	0.165216	0	1.00941	0.504703	Glycine, Serine, and Threonine Metabolism	Amino Acids
CHOLPtg	-0.164396	0	-0.0821981	-0.504703	0	-0.252351	Glycerophospholipid Metabolism	Lipids
CHOLPtl	-0.0320723	0	-0.0160361	-0.0894517	0	-0.0447259	Transport, Golgi Apparatus	Transport
CHOLt4	0	0	0	0	0	0	Transport, Lysosomal	Transport
CHOLtg	0	0.164396	0.0821981	0	0.504703	0.252351	Transport, Extracellular	Transport
CHOLtn	0	0	0	0	0	0	Transport, Golgi Apparatus	Transport
CHOLtr	0	0.164396	0.0821981	0	0.504703	0.252351	Transport, Nuclear	Transport
CHOLtu	-0.000102798	-0.000102798	-0.000102798	-0.00107073	-0.00107073	-0.00107073	Transport, Endoplasmic Reticular	Transport
CHSTEROLSULT	0	0.109597	0.0547987	0	0.336468	0.168234	Transport, Extracellular	Transport
CHSTEROLt	0	0.00540449	0.00270225	0	0.0163802	0.00819008	Steroid Metabolism	Steriods
CHSTEROLt1	0	0	0	0	0	0	Transport, Extracellular	Transport
CHSTEROLt2	0.000565042	0.00596953	0.00326729	0	0.0163802	0.00819008	Transport, Mitochondrial	Transport
CHSTEROLt3	-0.00596953	-0.000565042	-0.00326729	-0.0163802	0	-0.00819008	Transport, Mitochondrial	Transport
CHSTEROLtg	0	0	0	0	0	0	Transport, Mitochondrial	Transport
CHTNASE	0	0	0	0	0	0	Transport, Golgi Apparatus	Transport
CHTNASEe	0	0	0	0	0	0	Aminosugar Metabolism	Glycosylation
CITL	0	0.521073	0.260536	0	1.03165	0.515826	Aminosugar Metabolism	Glycosylation
CITRtm	0	0	0	0	0	0	Citric Acid Cycle	Central Metabolism
CITt4_2	0	0	0	0	0	0	Transport, Mitochondrial	Transport
CITt4_4	0	0	0	0	0	0	Transport, Extracellular	Transport
CITtam	-0.821981	0	-0.410991	-2.52351	0	-1.26176	Transport, Extracellular	Transport
CITtbm	0	0.284384	0.142192	0	0.296921	0.148461	Transport, Mitochondrial	Transport
CK	0	0.653769	0.326885	0	0.84772	0.42386	Transport, Mitochondrial	Transport
CKc	-1.05655	0	-0.528276	-0.96558	0	-0.48279	Urea cycle/amino group metabolism	Amino Acids
CLFORtex	0	0.00301879	0.0015094	0	0.00827143	0.00413571	Urea cycle/amino group metabolism	Amino Acids
CLFORtex2	0	0.00603759	0.00301879	0	0.0165429	0.00827143	Transport, Extracellular	Transport
CLHCO3tex2	0	0	0	0	0	0	Transport, Extracellular	Transport
CLHCOtex	0	0	0	0	0	0	Transport, Extracellular	Transport
CLI2tex	0	0	0	0	0	0	Transport, Extracellular	Transport
CLOHtex2	0	0	0	0	0	0	Transport, Extracellular	Transport
CLOXAtex2	0	0	0	0	0	0	Transport, Extracellular	Transport
CLPNDCOAtx	0	0	0	0	0	0	Transport, Extracellular	Transport
CLPNDCPT1	0	0	0	0	0	0	Transport, Peroxisomal	Transport
CLPNDCPT2	0	0	0	0	0	0	Carnitine shuttle	FAS
CLPNDCRNt	0	0	0	0	0	0	Carnitine shuttle	FAS
CLPNDt	0	0	0	0	0	0	Carnitine shuttle	FAS
CLS_hs	0	0	0	0	0	0	Transport, Extracellular	Transport
CMPACNAtg	0	0.00756134	0.00378067	0	0.0232136	0.0116068	Glycerophospholipid Metabolism	Lipids
CMPACNAtn	0	0.00749242	0.00374621	0	0.023002	0.011501	Transport, Golgi Apparatus	Transport
CMPSAS	0	0.00756134	0.00378067	0	0.0232136	0.0116068	Transport, Nuclear	Transport
CMPSASn	0	0.00749242	0.00374621	0	0.023002	0.011501	Aminosugar Metabolism	Glycosylation
CO2t	-10.5076	0	-5.25382	-10.6823	0	-5.34117	Aminosugar Metabolism	Glycosylation
CO2ter	-0.0121053	-0.00113008	-0.00661769	-0.033212	0	-0.016606	Transport, Extracellular	Transport
CO2tg	0	0	0	0	0	0	Transport, Endoplasmic Reticular	Transport
CO2tm	-0.465482	0.524952	0.0297349	-0.626174	2.23872	0.806271	Transport, Golgi Apparatus	Transport
CO2tn	0	0	0	0	0	0	Transport, Mitochondrial	Transport
CO2tp	-0.0363159	-0.00339025	-0.0198531	-0.0996359	0	-0.0498179	Transport, Nuclear	Transport
COAtg	0	0	0	0	0	0	Transport, Peroxisomal	Transport
COAtl	0	0	0	0	0	0	Transport, Golgi Apparatus	Transport
COAtm	-0.134631	0.556497	0.210933	-0.420586	1.07452	0.326966	Transport, Lysosomal	Transport
COAtn	0	0	0	0	0	0	Transport, Mitochondrial	Transport
COAtp	-0.569114	-0.00339025	-0.286252	-1.14335	0	-0.571673	Transport, Nuclear	Transport
COAtr	0	0	0	0	0	0	Transport, Peroxisomal	Transport
COKECBESr	0	0	0	0	0	0	Transport, Endoplasmic Reticular	Transport
COQ3m	0	0	0	0	0	0	Alkaloid biosynthesis II	Vitamins
COQ5m	0	0	0	0	0	0	Ubiquinone Biosynthesis	Vitamins
COQ6m	0	0	0	0	0	0	Ubiquinone Biosynthesis	Vitamins
COQ7m	0	0	0	0	0	0	Ubiquinone Biosynthesis	Vitamins
CORE2GTg	0	0.00756134	0.00378067	0	0.0232136	0.0116068	Ubiquinone Biosynthesis	Vitamins
CORE6GTg	0	0	0	0	0	0	O-Glycan Biosynthesis	Glycosylation
COt	0	0	0	0	0	0	O-Glycan Biosynthesis	Glycosylation
COUCOAFm	0	0	0	0	0	0	Transport, Extracellular	Transport
COUMARINte	0	0	0	0	0	0	Ubiquinone Biosynthesis	Vitamins
CPCTDTX	0	0	0	0	0	0	Transport, Extracellular	Transport
CPPPGO	0	0	0	0	0	0	Glycerophospholipid Metabolism	Lipids
CREATt4(2)r	-0.046052	0	-0.023026	-0.0420461	0	-0.021023	Heme Biosynthesis	Heme
CREATtmdiffir	0	1.24943	0.624714	0	1.26639	0.633196	Transport, Extracellular	Transport
CRMPte	0	0.0549312	0.0274656	0	0.091628	0.045814	Urea cycle/amino group metabolism	Amino Acids
CRNCAR3tp	0	0	0	0	0	0	Transport, Extracellular	Transport
CRNCARtp	0	0.565724	0.282862	0	1.14335	0.571673	Transport, Peroxisomal	Transport
CRNt	0	0	0	0	0	0	Transport, Peroxisomal	Transport
CRNtHa	0	0	0	0	0	0	Transport, Extracellular	Transport
CRNtim	0	0.547987	0.273994	0	1.68234	0.841171	Transport, Extracellular	Transport
CRNtuIR	0	0	0	0	0	0	Transport, Mitochondrial	Transport
CRNtuNa	0	0	0	0	0	0	Transport, Extracellular	Transport
CRNtx	0	0	0	0	0	0	Transport, Extracellular	Transport
CRTSLt	0	0	0	0	0	0	Transport, Peroxisomal	Transport
CRTSLtm	0	0	0	0	0	0	Transport, Extracellular	Transport
CRTSLtr	0	0	0	0	0	0	Transport, Mitochondrial	Transport
CRTSTRNt	0	0	0	0	0	0	Transport, Endoplasmic Reticular	Transport
CRTSTRNtm	0	0	0	0	0	0	Transport, Extracellular	Transport
CRTSTRNtr	0	0	0	0	0	0	Transport, Mitochondrial	Transport
CRVNCtr	0	0	0	0	0	0	Transport, Endoplasmic Reticular	Transport
CSm	0	0.682269	0.341135	0	1.29417	0.647086	Transport, Extracellular	Transport
CSNAT	0	0	0	0	0	0	Citric Acid Cycle	Central Metabolism
CSNAT2m	0	0	0	0	0	0	Carnitine shuttle	FAS
CSNAT2x	0	0	0	0	0	0	Carnitine shuttle	FAS
CSNAT3x	0	0	0	0	0	0	Fatty Acid Metabolism	FAS
CSNATer	0	0	0	0	0	0	Carnitine shuttle	FAS
CSNATm	0	0.547987	0.273994	0	1.68234	0.841171	Fatty Acid Metabolism	FAS
CSNATp	0	0.565724	0.282862	0	1.14335	0.571673	Fatty Acid Metabolism	FAS
CSNATr	-0.0163793	0.547987	0.265804	-0.0183426	1.68234	0.832	Fatty Acid Metabolism	FAS
CSNt	0	0	0	0	0	0	Carnitine shuttle	FAS
CSPG_At	0	0	0	0	0	0	Transport, Extracellular	Transport
CSPG_Atly	0	0	0	0	0	0	Transport, Extracellular	Transport
CSPG_Bt	0	0	0	0	0	0	Transport, Lysosomal	Transport
CSPG_Btly	0	0	0	0	0	0	Transport, Extracellular	Transport
CSPG_Ct	0	0	0	0	0	0	Transport, Lysosomal	Transport
CSPG_Ctly	0	0	0	0	0	0	Transport, Extracellular	Transport
CSPG_Dt	0	0	0	0	0	0	Transport, Lysosomal	Transport
CSPG_Dtly	0	0	0	0	0	0	Transport, Extracellular	Transport
CSPG_Et	0	0	0	0	0	0	Transport, Lysosomal	Transport
CSPG_Etly	0	0	0	0	0	0	Transport, Extracellular	Transport
CTPS1	0	0.167104	0.083552	0	0.509799	0.2549	Transport, Lysosomal	Transport
CTPS2	0	0.128472	0.0642358	0	0.351393	0.175696	Nucleotides	Nucleotides
CTPtn	0	0.00749242	0.00374621	0	0.023002	0.011501	Pyrimidine Biosynthesis	Nucleotides
CYANSTm	0	0	0	0	0	0	Transport, Nuclear	Transport
CYANt	0	0	0	0	0	0	Cysteine Metabolism	Amino Acids
CYANtm	0	0	0	0	0	0	Transport, Extracellular	Transport
CYOOm2	0	0.297265	0.148633	0	0.303366	0.151683	Transport, Mitochondrial	Transport
CYOOm3	0	0	0	0	0	0	Oxidative Phosphorylation	Central Metabolism
CYOR-u10m	0.265738	0.594531	0.430134	0.0100065	0.606733	0.30837	Oxidative Phosphorylation	Central Metabolism
CYSALANaEx	0	0	0	0	0	0	Oxidative Phosphorylation	Central Metabolism
CYSAMO	0	0.00315047	0.00157524	0	0.00185501	0.000927505	Transport, Extracellular	Transport
CYSASNNaEx	0	0	0	0	0	0	Taurine and hypotaurine metabolism	Amino Acids
CYSGLNNaEx	0	0	0	0	0	0	Transport, Extracellular	Transport
CYSGLUexR	0	0	0	0	0	0	Transport, Extracellular	Transport
CYSGLYex	0	0	0	0	0	0	Transport, Extracellular	Transport
CYSGLYexR	0	0	0	0	0	0	Transport, Extracellular	Transport
CYSSERNaEx	0	0	0	0	0	0	Transport, Extracellular	Transport
CYSt4	0	0	0	0	0	0	Transport, Extracellular	Transport
CYSTA	0	0.00157524	0.000787618	0	0.000927505	0.000463753	Transport, Extracellular	Transport
CYSTAm	0	0	0	0	0	0	Cysteine Metabolism	Amino Acids
CYStec	0	0	0	0	0	0	Cysteine Metabolism	Amino Acids
CYSTGL	0.0034326	0.00658307	0.00500784	0.0032122	0.00506721	0.00413971	Transport, Extracellular	Transport
CYSTGLUex	0	0	0	0	0	0	Cysteine Metabolism	Amino Acids
CYSTHRNaEx	0	0	0	0	0	0	Transport, Extracellular	Transport
CYSTS	0.0034326	0.00658307	0.00500784	0.0032122	0.00506721	0.00413971	Transport, Extracellular	Transport
CYSTSERex	0	0	0	0	0	0	Methionine Metabolism	Amino Acids
CYTD	0	0.164396	0.0821981	0	0.504703	0.252351	Transport, Extracellular	Transport
CYTDK1	0	0.328792	0.164396	0	1.00941	0.504703	Pyrimidine Catabolism	Nucleotides
CYTDK2m	0	0.0192035	0.00960173	0	0.055871	0.0279355	Nucleotides	Nucleotides
CYTDn	0	0.109597	0.0547987	0	0.336468	0.168234	Nucleotides	Nucleotides
CYTDt	-0.0232501	0	-0.011625	-0.000648929	0	-0.000324465	Nucleotides	Nucleotides
CYTDt4	0	0	0	0	0	0	Transport, Extracellular	Transport
CYTDt5	0	0	0	0	0	0	Transport, Extracellular	Transport
CYTDtl	0	0	0	0	0	0	Transport, Extracellular	Transport
CYTDtm	0	0.0192035	0.00960173	0	0.055871	0.0279355	Nucleotides	Nucleotides
CYTDtn	0	0.109597	0.0547987	0	0.336468	0.168234	Transport, Mitochondrial	Transport
CYTK1	0.135064	0.156315	0.145689	-0.00129786	-0.0589646	-0.0301312	Transport, Nuclear	Transport
CYTK10	-0.181192	-0.183191	-0.182192	0	0	0	Nucleotides	Nucleotides
CYTK10n	0	0	0	0	0	0	Nucleotides	Nucleotides
CYTK11	0.181192	0.171566	0.176379	0	0	0	Nucleotides	Nucleotides
CYTK11n	0	0	0	0	0	0	Nucleotides	Nucleotides
CYTK12	0	0	0	0	0	0	Nucleotides	Nucleotides
CYTK12n	0	0	0	0	0	0	Nucleotides	Nucleotides
CYTK13	0	0	0	0.0106554	0.0394888	0.0250721	Nucleotides	Nucleotides
CYTK13n	0	0	0	0	0	0	Nucleotides	Nucleotides
CYTK14	-0.182756	-0.17313	-0.177943	-0.0106554	-0.0394888	-0.0250721	Nucleotides	Nucleotides
CYTK14n	0	0	0	0	0	0	Nucleotides	Nucleotides
CYTK1m	0	0.0192035	0.00960173	0	0.055871	0.0279355	Nucleotides	Nucleotides
CYTK1n	0	0	0	0	0	0	Nucleotides	Nucleotides
CYTK2	0	0	0	0	0	0	Nucleotides	Nucleotides
CYTK2n	0	0	0	0	0	0	Nucleotides	Nucleotides
CYTK3	0	0	0	0	0	0	Nucleotides	Nucleotides
CYTK3n	0	0	0	0	0	0	Nucleotides	Nucleotides
CYTK4	0	0	0	0	0	0	Nucleotides	Nucleotides
CYTK4n	0	0	0	0	0	0	Nucleotides	Nucleotides
CYTK5	0	0	0	0	0	0	Nucleotides	Nucleotides
CYTK5n	0	0	0	0	0	0	Nucleotides	Nucleotides
CYTK6	0.0238462	-0.0138582	0.00499399	0.000648929	-0.0432544	-0.0213027	Nucleotides	Nucleotides
CYTK6n	0	0	0	0	0	0	Nucleotides	Nucleotides
CYTK7	0	0	0	0	0	0	Nucleotides	Nucleotides
CYTK7n	0	0	0	0	0	0	Nucleotides	Nucleotides
CYTK8	0	0	0	0	0	0	Nucleotides	Nucleotides
CYTK8n	0	0	0	0	0	0	Nucleotides	Nucleotides
CYTK9	0	0	0	0	0	0	Nucleotides	Nucleotides
CYTK9n	0	0	0	0	0	0	Nucleotides	Nucleotides
CytOxe-	0	1.18906	0.594531	0	1.21347	0.606733	Nucleotides	Nucleotides
D-LACt2	-0.144324	0	-0.0721619	-0.47444	0	-0.23722	[]	Misc
D-LACtm	0	0	0	0	0	0	Transport, Extracellular	Transport
DADA	0	0.101372	0.0506862	0	0.260034	0.130017	Transport, Mitochondrial	Transport
DADAe	0	0.101372	0.0506862	0	0.260034	0.130017	Nucleotides	Nucleotides
DADNK	0.000580278	0.329373	0.164977	0	1.00941	0.504703	Nucleotides	Nucleotides
DADNt4	-0.101372	0	-0.0506862	-0.260034	0	-0.130017	Nucleotides	Nucleotides
DAG_HSter	0	0	0	0	0	0	Transport, Extracellular	Transport
DAGK_hs	-0.011265	0.327171	0.157953	0	1.00941	0.504703	Transport, Endoplasmic Reticular	Transport
DAGKn_hs	0	0	0	0	0	0	Glycerophospholipid Metabolism	Lipids
DAGt	-0.0166681	0	-0.00833405	0	0	0	Glycerophospholipid Metabolism	Lipids
DALAOXx	0	0.140971	0.0704854	0	0.199221	0.0996106	Transport, Extracellular	Transport
DALAt2r	0	0	0	0	0	0	D-alanine metabolism	Amino Acids
DALAt2rL	0	0	0	0	0	0	Transport, Extracellular	Transport
DALAxt	0	0.140971	0.0704854	0	0.199221	0.0996106	Transport, Lysosomal	Transport
DASCBH	0	0	0	0	0	0	D-alanine metabolism	Amino Acids
DASCBR	0	0.126459	0.0632293	0	0.303366	0.151683	Ascorbate and Aldarate Metabolism	Vitamins
DASPO1p	0	0	0	0	0	0	Ascorbate and Aldarate Metabolism	Vitamins
DATPtn	0	0.0197826	0.00989129	0	0.0183256	0.0091628	Alanine and Aspartate Metabolism	Amino Acids
DCK1n	0	0	0	0	0	0	Transport, Nuclear	Transport
DCK2n	0	0	0	0	0	0	Nucleotides	Nucleotides
DCMPDA	-0.328212	0.0678303	-0.130191	-1.00941	0.218723	-0.395341	Nucleotides	Nucleotides
DCSPTN1COAtx	0	0	0	0	0	0	Pyrimidine Catabolism	Nucleotides
DCSPTN1CPT1	0	0	0	0	0	0	Transport, Peroxisomal	Transport
DCSPTN1CPT2	0	0	0	0	0	0	Carnitine shuttle	FAS
DCSPTN1CRNt	0	0	0	0	0	0	Carnitine shuttle	FAS
DCSPTN1t	0	0	0	0	0	0	Carnitine shuttle	FAS
DCTPtn	0	0.0299275	0.0149638	0	0.0305427	0.0152713	Transport, Extracellular	Transport
DCYTD	0	0.329373	0.164686	0	1.00941	0.504703	Transport, Nuclear	Transport
DCYTt	-0.0356289	0	-0.0178144	-0.0305427	0	-0.0152713	Pyrimidine Catabolism	Nucleotides
DEBRISOQUINEt	0	0	0	0	0	0	Transport, Extracellular	Transport
DEDOLP1_L	0	0	0	0	0	0	Transport, Extracellular	Transport
DEDOLP1_U	0	0	0	0	0	0	N-Glycan Biosynthesis	Glycosylation
DEDOLP2_L	0	0	0	0	0	0	N-Glycan Biosynthesis	Glycosylation
DEDOLP2_U	0	0	0	0	0	0	N-Glycan Biosynthesis	Glycosylation
DEDOLR_L	0	0	0	0	0	0	N-Glycan Biosynthesis	Glycosylation
DEDOLR_U	0	0	0	0	0	0	N-Glycan Biosynthesis	Glycosylation
DESAT16_2	3.29962e-05	0.10258	0.0513067	0	0.28803	0.144015	N-Glycan Biosynthesis	Glycosylation
DESAT18_10	0	0	0	0	0	0	Fatty acid elongation	FAS
DESAT18_3	0	0.0540013	0.0270006	0	0.153234	0.0766171	Fatty acid elongation	FAS
DESAT18_4	0	0.0894673	0.0447337	0	0.221172	0.110586	Fatty acid elongation	FAS
DESAT18_5	0	0.0894673	0.0447337	0	0.221172	0.110586	Fatty acid elongation	FAS
DESAT18_6	0	0.0545046	0.0272523	0	0.139433	0.0697167	Fatty acid elongation	FAS
DESAT18_7	0	0.0449566	0.0224783	0	0.12863	0.0643151	Fatty acid elongation	FAS
DESAT18_8	0	0.0449566	0.0224783	0	0.12863	0.0643151	Fatty acid elongation	FAS
DESAT18_9	0	0	0	0	0	0	Fatty acid elongation	FAS
DESAT20_1	0	0	0	0	0	0	Fatty acid elongation	FAS
DESAT20_2	0	0	0	0	0	0	Fatty acid elongation	FAS
DESAT22_1p	0	0	0	0	0	0	Fatty acid elongation	FAS
DESAT22_2p	0	0	0	0	0	0	Fatty acid elongation	FAS
DESAT24_1	0	0	0	0	0	0	Fatty acid elongation	FAS
DGAT	7.40336e-05	0.018724	0.00939901	0	0	0	Fatty acid elongation	FAS
DGCHOLte	0	0	0	0	0	0	Triacylglycerol Synthesis	Lipids
DGK1	-0.0682714	-0.000403244	-0.0343373	-0.218723	0	-0.109362	Transport, Extracellular	Transport
DGK2m	0	0.0272308	0.0136154	0	0.045814	0.022907	Nucleotides	Nucleotides
DGNSKm	0	0.0272308	0.0136154	0	0.045814	0.022907	Nucleotides	Nucleotides
DGSNt	-0.0215302	0	-0.0107651	-0.0183256	0	-0.0091628	Nucleotides	Nucleotides
DGSNtm	0	0.0272308	0.0136154	0	0.045814	0.022907	Transport, Extracellular	Transport
DGTPtn	0	0.0214552	0.0107276	0	0.0183256	0.0091628	Transport, Mitochondrial	Transport
DGULND	0	0.126626	0.0633129	0	0.346955	0.173478	Transport, Nuclear	Transport
DHAAt1r	0	0	0	0	0	0	Pentose and Glucuronate Interconversions	Central Metabolism
DHAPA	0	0	0	0	0	0	Transport, Extracellular	Transport
DHAPAx	0	0	0	0	0	0	Triacylglycerol Synthesis	Lipids
DHCHOLESTANATEtm	0	0	0	0	0	0	Triacylglycerol Synthesis	Lipids
DHCR241r	0	0.00605264	0.00302632	0	0.016606	0.00830299	Transport, Peroxisomal	Transport
DHCR242r	0	0.00605264	0.00302632	0	0.016606	0.00830299	Cholesterol Metabolism	Steriods
DHCR243r	0	0.00596953	0.00298477	0	0.0163802	0.00819008	Cholesterol Metabolism	Steriods
DHCR71r	0	0.00596953	0.00298477	0	0.0163802	0.00819008	Cholesterol Metabolism	Steriods
DHCR72r	0	0.00596953	0.00298477	0	0.0163802	0.00819008	Cholesterol Metabolism	Steriods
DHCRD1	0	0.0552525	0.0276262	0	0.091628	0.045814	Cholesterol Metabolism	Steriods
DHCRD2	0	0.00558049	0.00279025	0	0.0152822	0.0076411	Sphingolipid Metabolism	Lipids
DHDPBMTm	0	0	0	0	0	0	Sphingolipid Metabolism	Lipids
DHEASt	0	0	0	0	0	0	Ubiquinone Biosynthesis	Vitamins
DHEAStr	0	0	0	0	0	0	Transport, Extracellular	Transport
DHEAtr	0	0	0	0	0	0	Transport, Extracellular	Transport
DHFR	0.000580278	0.0487794	0.0246798	0	0.045814	0.022907	Transport, Endoplasmic Reticular	Transport
DHFtl	-0.0821981	0	-0.0410991	-0.252351	0	-0.126176	Folate Metabolism	Vitamins
DHFtm	0	0.0657585	0.0328792	0	0.201881	0.100941	Transport, Lysosomal	Transport
DHORD9	0.00336987	0.0571578	0.0302639	0.0100065	0.0558205	0.0329135	Transport, Mitochondrial	Transport
DHORTS	-0.0571578	-0.00336987	-0.0302639	-0.0558205	-0.0100065	-0.0329135	Pyrimidine Biosynthesis	Nucleotides
DHPM1	0	0	0	0	0	0	Pyrimidine Biosynthesis	Nucleotides
DHPR	0	0.0123354	0.00616771	0	0.0130268	0.0065134	Pyrimidine Catabolism	Nucleotides
DHPR2	0	0.0123354	0.00616771	0	0.0130268	0.0065134	Tetrahydrobiopterin	Vitamins
DIDPtn	0	0	0	0	0	0	Tetrahydrobiopterin	Vitamins
DIGALSGALSIDEte	0	0	0	0	0	0	Transport, Nuclear	Transport
DIGALSIDEtl	0	0	0	0	0	0	Transport, Extracellular	Transport
DINt	-0.0257746	0.101372	0.0377989	-0.022907	0.260034	0.118564	Transport, Lysosomal	Transport
DITPtn	0	0	0	0	0	0	Transport, Extracellular	Transport
DLNLCGCPT1	0	0	0	0	0	0	Transport, Nuclear	Transport
DLNLCGCPT2	0	0	0	0	0	0	Carnitine shuttle	FAS
DLNLCGCRNt	0	0	0	0	0	0	Carnitine shuttle	FAS
DLNLCGt	0	0	0	0	0	0	Carnitine shuttle	FAS
DM_13-cis-oretn(n)	0	0	0	0	0	0	Transport, Extracellular	Transport
DM_13-cis-retn(n)	0	0	0	0	0	0	[]	Misc
DM_Asn-X-Ser/Thr(ly)	0	0	0	0	0	0	[]	Misc
DM_atp(c)	0	0.328792	0.164396	0	1.00941	0.504703	[]	Misc
DM_avite1(c)	0	0	0	0	0	0	[]	Misc
DM_avite2(c)	0	0	0	0	0	0	[]	Misc
DM_bvite(c)	0	0	0	0	0	0	[]	Misc
DM_datp(m)	0	0.0187545	0.00937727	0	0.0183256	0.0091628	[]	Misc
DM_datp(n)	0	0.0197826	0.00989129	0	0.0183256	0.0091628	[]	Misc
DM_dctp(m)	0	0.0272487	0.0136244	0	0.0305427	0.0152713	[]	Misc
DM_dctp(n)	0	0.0299275	0.0149638	0	0.0305427	0.0152713	[]	Misc
DM_dgtp(m)	0	0.0206553	0.0103277	0	0.0183256	0.0091628	[]	Misc
DM_dgtp(n)	0	0.0214552	0.0107276	0	0.0183256	0.0091628	[]	Misc
DM_dsT_antigen(g)	0	0	0	0	0	0	[]	Misc
DM_dttp(m)	0	0.026967	0.0134835	0	0.045814	0.022907	[]	Misc
DM_dttp(n)	0	0.0295236	0.0147618	0	0.045814	0.022907	[]	Misc
DM_ethamp(r)	0	0.0550622	0.0275311	0	0.091628	0.045814	[]	Misc
DM_gpi_sig(er)	0	0	0	0	0	0	[]	Misc
DM_kdn(c)	0	0.0642839	0.032142	0	0.19756	0.0987801	[]	Misc
DM_m(em)3gacpail_prot_hs(r)	0	0	0	0	0	0	[]	Misc
DM_mem2emgacpail_prot_hs(r)	0	0	0	0	0	0	[]	Misc
DM_n5m2masn(g)	0	0	0	0	0	0	[]	Misc
DM_oretn(n)	0	0	0	0	0	0	[]	Misc
DM_Ser-Gly/Ala-X-Gly(ly)	0	0	0	0	0	0	[]	Misc
DM_Ser/Thr(ly)	0	0	0	0	0	0	[]	Misc
DM_sprm(c)	0	0	0	0	0	0	[]	Misc
DM_sTn_antigen(g)	0	0	0	0	0	0	[]	Misc
DM_T_antigen(g)	0	0	0	0	0	0	[]	Misc
DM_yvite(c)	0	0	0	0	0	0	[]	Misc
DMATT	0	0	0	0	0	0	[]	Misc
DMATTx	0.00113008	0.0121053	0.00661769	0	0.033212	0.016606	Cholesterol Metabolism	Steriods
DMHPTCRNCPT1	0	0	0	0	0	0	Cholesterol Metabolism	Steriods
DMHPTCRNCPT2	0	0	0	0	0	0	Carnitine shuttle	FAS
DMHPTCRNt	0	0	0	0	0	0	Carnitine shuttle	FAS
DMHPTCRNte	0	0	0	0	0	0	Carnitine shuttle	FAS
DMNONCRNCPT2	0	0	0	0	0	0	Transport, Extracellular	Transport
DMNONCRNt	0	0	0	0	0	0	Carnitine shuttle	FAS
DNADDP	0	0.164396	0.0821981	0	0.504703	0.252351	Carnitine shuttle	FAS
DNADtn	-0.460203	0	-0.230102	-0.893953	0	-0.446976	NAD Metabolism	Vitamins
DNAMTn	0	0	0	0	0	0	Transport, Nuclear	Transport
DNAMTSEn	0	0	0	0	0	0	Methionine Metabolism	Amino Acids
DNDPt10m	0	0	0	0	0	0	Selenoamino acid metabolism	Amino Acids
DNDPt11m	0	0	0	0	0	0	Transport, Mitochondrial	Transport
DNDPt12m	0	0.0274619	0.013731	0	0.045814	0.022907	Transport, Mitochondrial	Transport
DNDPt13m	0	0.0274619	0.013731	0	0.045814	0.022907	Transport, Mitochondrial	Transport
DNDPt14m	0	0	0	0	0	0	Transport, Mitochondrial	Transport
DNDPt15m	0	0.0274619	0.013731	0	0.045814	0.022907	Transport, Mitochondrial	Transport
DNDPt16m	0	0.0274619	0.013731	0	0.045814	0.022907	Transport, Mitochondrial	Transport
DNDPt17m	0	0	0	0	0	0	Transport, Mitochondrial	Transport
DNDPt18m	0	0.0274619	0.013731	0	0.045814	0.022907	Transport, Mitochondrial	Transport
DNDPt19m	0	0.0274619	0.013731	0	0.045814	0.022907	Transport, Mitochondrial	Transport
DNDPt1m	0	0.0274619	0.013731	0	0.045814	0.022907	Transport, Mitochondrial	Transport
DNDPt20m	0	0.0274619	0.013731	0	0.045814	0.022907	Transport, Mitochondrial	Transport
DNDPt21m	0	0.0274619	0.013731	0	0.045814	0.022907	Transport, Mitochondrial	Transport
DNDPt22m	0	0	0	0	0.045814	0.022907	Transport, Mitochondrial	Transport
DNDPt23m	0	0	0	0	0.0456594	0.0228297	Transport, Mitochondrial	Transport
DNDPt24m	0	0	0	0	0.0456594	0.0228297	Transport, Mitochondrial	Transport
DNDPt25m	0	0	0	0	0	0	Transport, Mitochondrial	Transport
DNDPt26m	0	0.0204283	0.0102141	0	0	0	Transport, Mitochondrial	Transport
DNDPt27m	0	0.0204283	0.0102141	0	0	0	Transport, Mitochondrial	Transport
DNDPt28m	0	0	0	0	0.0456594	0.0228297	Transport, Mitochondrial	Transport
DNDPt29m	0	0	0	0	0	0	Transport, Mitochondrial	Transport
DNDPt2m	0	0.0274619	0.013731	0	0.045814	0.022907	Transport, Mitochondrial	Transport
DNDPt30m	0	0.0274619	0.013731	0	0.045814	0.022907	Transport, Mitochondrial	Transport
DNDPt31m	0	0.0274619	0.013731	0	0.045814	0.022907	Transport, Mitochondrial	Transport
DNDPt32m	0	0.0274619	0.013731	0	0.045814	0.022907	Transport, Mitochondrial	Transport
DNDPt33m	0	0	0	0	0	0	Transport, Mitochondrial	Transport
DNDPt34m	0	0	0	0	0	0	Transport, Mitochondrial	Transport
DNDPt35m	0	0	0	0	0	0	Transport, Mitochondrial	Transport
DNDPt36m	0	0	0	0	0	0	Transport, Mitochondrial	Transport
DNDPt37m	0	0	0	0	0	0	Transport, Mitochondrial	Transport
DNDPt38m	0	0	0	0	0	0	Transport, Mitochondrial	Transport
DNDPt39m	0	0.0274619	0.013731	0	0.045814	0.022907	Transport, Mitochondrial	Transport
DNDPt3m	0	0	0	0	0	0	Transport, Mitochondrial	Transport
DNDPt40m	0	0	0	0	0	0	Transport, Mitochondrial	Transport
DNDPt41m	0	0	0	0	0	0	Transport, Mitochondrial	Transport
DNDPt42m	0	0.0274619	0.013731	0	0.045814	0.022907	Transport, Mitochondrial	Transport
DNDPt43m	0	0.0274619	0.013731	0	0.045814	0.022907	Transport, Mitochondrial	Transport
DNDPt44m	0	0.0274619	0.013731	0	0.045814	0.022907	Transport, Mitochondrial	Transport
DNDPt45m	0	0.0274619	0.013731	0	0.045814	0.022907	Transport, Mitochondrial	Transport
DNDPt46m	0	0	0	0	0.045814	0.022907	Transport, Mitochondrial	Transport
DNDPt47m	0	0	0	0	0	0	Transport, Mitochondrial	Transport
DNDPt48m	0	0.0274619	0.013731	0	0.0456594	0.0228297	Transport, Mitochondrial	Transport
DNDPt49m	0	0	0	0	0	0	Transport, Mitochondrial	Transport
DNDPt4m	0	0	0	0	0	0	Transport, Mitochondrial	Transport
DNDPt50m	0	0	0	0	0	0	Transport, Mitochondrial	Transport
DNDPt51m	0	0	0	0	0	0	Transport, Mitochondrial	Transport
DNDPt52m	0	0.0204283	0.0102141	0	0.0100209	0.00501043	Transport, Mitochondrial	Transport
DNDPt53m	0	0.0269599	0.01348	0	0.0345792	0.0172896	Transport, Mitochondrial	Transport
DNDPt54m	0	0	0	0	0	0	Transport, Mitochondrial	Transport
DNDPt55m	0	0.0274619	0.013731	0	0.045814	0.022907	Transport, Mitochondrial	Transport
DNDPt56m	0	0.0274619	0.013731	0	0.045814	0.022907	Transport, Mitochondrial	Transport
DNDPt57m	0	0.0274619	0.013731	0	0.045814	0.022907	Transport, Mitochondrial	Transport
DNDPt58m	0	0.0274619	0.013731	0	0.045814	0.022907	Transport, Mitochondrial	Transport
DNDPt59m	0	0	0	0	0	0	Transport, Mitochondrial	Transport
DNDPt5m	0	0	0	0	0	0	Transport, Mitochondrial	Transport
DNDPt60m	0	0	0	0	0	0	Transport, Mitochondrial	Transport
DNDPt61m	0	0	0	0	0	0	Transport, Mitochondrial	Transport
DNDPt62m	0	0	0	0	0	0	Transport, Mitochondrial	Transport
DNDPt63m	0	0	0	0	0	0	Transport, Mitochondrial	Transport
DNDPt6m	0	0	0	0	0.045814	0.022907	Transport, Mitochondrial	Transport
DNDPt7m	0	0	0	0	0	0	Transport, Mitochondrial	Transport
DNDPt8m	0	0	0	0	0	0	Transport, Mitochondrial	Transport
DNDPt9m	0	0	0	0	0	0	Transport, Mitochondrial	Transport
DOGULND1	0	0	0	0	0	0	Transport, Mitochondrial	Transport
DOGULND2	0	0	0	0	0	0	Ascorbate and Aldarate Metabolism	Vitamins
DOGULNO1	0	0	0	0	0	0	Ascorbate and Aldarate Metabolism	Vitamins
DOGULNO2	0	0	0	0	0	0	Ascorbate and Aldarate Metabolism	Vitamins
DOLASNT_Ler	0	0.0113377	0.00566884	0	0.0348071	0.0174035	Ascorbate and Aldarate Metabolism	Vitamins
DOLASNT_Uer	0	0.0113377	0.00566884	0	0.0348071	0.0174035	N-Glycan Biosynthesis	Glycosylation
DOLDPP_Ler	0	0.0113377	0.00566884	0	0.0348071	0.0174035	N-Glycan Biosynthesis	Glycosylation
DOLDPP_Uer	0	0.0113377	0.00566884	0	0.0348071	0.0174035	N-Glycan Biosynthesis	Glycosylation
DOLGLCP_Lter	0	0.164396	0.0821981	0	0.504703	0.252351	N-Glycan Biosynthesis	Glycosylation
DOLGLCP_Uter	0	0.164396	0.0821981	0	0.504703	0.252351	N-Glycan Biosynthesis	Glycosylation
DOLGPP_Ler	0	0.164396	0.0821981	0	0.504703	0.252351	N-Glycan Biosynthesis	Glycosylation
DOLGPP_Uer	0	0.164396	0.0821981	0	0.504703	0.252351	N-Glycan Biosynthesis	Glycosylation
DOLICHOL_Lter	0	0.109597	0.0547987	0	0.336468	0.168234	N-Glycan Biosynthesis	Glycosylation
DOLICHOL_Uter	0	0.109597	0.0547987	0	0.336468	0.168234	N-Glycan Biosynthesis	Glycosylation
DOLK_L	0	0.109597	0.0547987	0	0.336468	0.168234	N-Glycan Biosynthesis	Glycosylation
DOLK_U	0	0.109597	0.0547987	0	0.336468	0.168234	N-Glycan Biosynthesis	Glycosylation
DOLMANP_Lter	0	0.0453507	0.0226753	0	0.139228	0.0696142	N-Glycan Biosynthesis	Glycosylation
DOLMANP_Uter	0	0.0453507	0.0226753	0	0.139228	0.0696142	N-Glycan Biosynthesis	Glycosylation
DOLP_Lter	0	0.164396	0.0821981	0	0.504703	0.252351	N-Glycan Biosynthesis	Glycosylation
DOLP_Uter	0	0.164396	0.0821981	0	0.504703	0.252351	N-Glycan Biosynthesis	Glycosylation
DOLPGT1_Ler	0	0.0113377	0.00566884	0	0.0348071	0.0174035	N-Glycan Biosynthesis	Glycosylation
DOLPGT1_Uer	0	0.0113377	0.00566884	0	0.0348071	0.0174035	N-Glycan Biosynthesis	Glycosylation
DOLPGT2_Ler	0	0.0113377	0.00566884	0	0.0348071	0.0174035	N-Glycan Biosynthesis	Glycosylation
DOLPGT2_Uer	0	0.0113377	0.00566884	0	0.0348071	0.0174035	N-Glycan Biosynthesis	Glycosylation
DOLPGT3_Ler	0	0.0113377	0.00566884	0	0.0348071	0.0174035	N-Glycan Biosynthesis	Glycosylation
DOLPGT3_Uer	0	0.0113377	0.00566884	0	0.0348071	0.0174035	N-Glycan Biosynthesis	Glycosylation
DOLPH_Ler	0	0.109597	0.0547987	0	0.336468	0.168234	N-Glycan Biosynthesis	Glycosylation
DOLPH_Uer	0	0.109597	0.0547987	0	0.336468	0.168234	N-Glycan Biosynthesis	Glycosylation
DOLPMT_L	0	0.0453507	0.0226753	0	0.139228	0.0696142	N-Glycan Biosynthesis	Glycosylation
DOLPMT_U	0	0.0453507	0.0226753	0	0.139228	0.0696142	N-Glycan Biosynthesis	Glycosylation
DOLPMT1_Ler	0	0.0113377	0.00566884	0	0.0348071	0.0174035	N-Glycan Biosynthesis	Glycosylation
DOLPMT1_Uer	0	0.0113377	0.00566884	0	0.0348071	0.0174035	N-Glycan Biosynthesis	Glycosylation
DOLPMT2_Ler	0	0.0113377	0.00566884	0	0.0348071	0.0174035	N-Glycan Biosynthesis	Glycosylation
DOLPMT2_Uer	0	0.0113377	0.00566884	0	0.0348071	0.0174035	N-Glycan Biosynthesis	Glycosylation
DOLPMT3_Ler	0	0.0113377	0.00566884	0	0.0348071	0.0174035	N-Glycan Biosynthesis	Glycosylation
DOLPMT3_Uer	0	0.0113377	0.00566884	0	0.0348071	0.0174035	N-Glycan Biosynthesis	Glycosylation
DOLPMT4_Ler	0	0.0113377	0.00566884	0	0.0348071	0.0174035	N-Glycan Biosynthesis	Glycosylation
DOLPMT4_Uer	0	0.0113377	0.00566884	0	0.0348071	0.0174035	N-Glycan Biosynthesis	Glycosylation
DOPABMO	0	0	0	0	0	0	N-Glycan Biosynthesis	Glycosylation
DOPAMT	0	0	0	0	0	0	Tyrosine metabolism	Amino Acids
DOPASFt	0	0	0	0	0	0	Tyrosine metabolism	Amino Acids
DOPASULT	0	0	0	0	0	0	Transport, Extracellular	Transport
DOPAt4(2)r	0	0	0	0	0	0	Tyrosine metabolism	Amino Acids
DOPAtu	0	0.493189	0.246594	0	1.51411	0.757054	Transport, Extracellular	Transport
DOPAVESSEC	0	0.164396	0.0821981	0	0.504703	0.252351	Transport, Extracellular	Transport
DPCOAK	0	0	0	0	0	0	Transport, Extracellular	Transport
DPCOAPP	0	0.164396	0.0821981	0	0.504703	0.252351	CoA Biosynthesis	Vitamins
DPCOAtl	0	0	0	0	0	0	CoA Catabolism	Vitamins
DPHMBDCm	0	0	0	0	0	0	Transport, Lysosomal	Transport
DPMVDx	0.00339025	0.0363159	0.0198531	0	0.0996359	0.0498179	Ubiquinone Biosynthesis	Vitamins
DRIBt	-0.0666697	0	-0.0333349	-0.218723	0	-0.109362	Cholesterol Metabolism	Steriods
DRPA	0	0	0	0	0	0	Transport, Extracellular	Transport
DSAT	0.00019031	0.0552525	0.0277214	0	0.091628	0.045814	Pentose Phosphate Pathway	Central Metabolism
DTDPtn	0	0	0	0	0	0	Sphingolipid Metabolism	Lipids
DTMPK	0	0.0295236	0.0147618	0	0.045814	0.022907	Transport, Nuclear	Transport
DTTPtn	0	0	0	0	0.045814	0.022907	Nucleotides	Nucleotides
DUDPtn	0	0	0	0	0	0	Transport, Nuclear	Transport
DUMPtn	0	0	0	0	0	0	Transport, Nuclear	Transport
DURAD	0	0	0	0	0	0	Transport, Nuclear	Transport
DURAD2	0	0	0	0	0	0	Pyrimidine Catabolism	Nucleotides
DURIK1	0	0.328792	0.164396	0	1.00941	0.504703	Pyrimidine Catabolism	Nucleotides
DURIK1m	0	0.410991	0.205495	0	1.26176	0.630878	Nucleotides	Nucleotides
DURIPP	-0.0488332	0.06725	0.00920842	-0.045814	0.218723	0.0864547	Nucleotides	Nucleotides
DURIt	-0.036475	0	-0.0182375	-0.045814	0	-0.022907	Nucleotides	Nucleotides
DURItn	0	0	0	0	0	0	Transport, Extracellular	Transport
DUTPDPm	0	0.205495	0.102748	0	0.630878	0.315439	Transport, Nuclear	Transport
DUTPDPn	0	0	0	0	0	0	Nucleotides	Nucleotides
EAFLATOXINte	0	0	0	0	0	0	Nucleotides	Nucleotides
EBASTINEOHte	0	0	0	0	0	0	Transport, Extracellular	Transport
EBASTINEte	0	0	0	0	0	0	Transport, Extracellular	Transport
EBP1r	0	0.00605264	0.00302632	0	0.016606	0.00830299	Transport, Extracellular	Transport
EBP2r	0	0.00605264	0.00302632	0	0.016606	0.00830299	Cholesterol Metabolism	Steriods
ECOAH12m	0	0.000626959	0.00031348	0	0.000124224	6.21118e-05	Cholesterol Metabolism	Steriods
ECOAH1m	0	0	0	0	0	0	Valine, Leucine, and Isoleucine Metabolism	Amino Acids
ECOAH1x	0	0	0	0	0	0	Tryptophan metabolism	Amino Acids
ECOAH9m	0	0	0	0	0	0	Tryptophan metabolism	Amino Acids
EGMESTr	0	0	0	0	0	0	Valine, Leucine, and Isoleucine Metabolism	Amino Acids
EHGLAT	0	0	0	0	0	0	Alkaloid biosynthesis II	Vitamins
EHGLAT2m	0	0	0	0	0	0	Arginine and Proline Metabolism	Amino Acids
EHGLATm	0	0	0	0	0	0	Arginine and Proline Metabolism	Amino Acids
EICOSTETCPT1	0	0	0	0	0	0	Arginine and Proline Metabolism	Amino Acids
EICOSTETCPT2	0	0	0	0	0	0	Carnitine shuttle	FAS
EICOSTETCRNt	0	0	0	0	0	0	Carnitine shuttle	FAS
EICOSTETt	0	0	0	0	0	0	Carnitine shuttle	FAS
ELAIDCPT1	0	0.0399866	0.0199933	0	0.0399866	0.0199933	Transport, Extracellular	Transport
ELAIDCPT2	0	0.0399866	0.0199933	0	0.0399866	0.0199933	Carnitine shuttle	FAS
ELAIDCRNt	0	0.0399866	0.0199933	0	0.0399866	0.0199933	Carnitine shuttle	FAS
ELAIDt	-0.0894673	0	-0.0447337	-0.195676	0	-0.0978382	Carnitine shuttle	FAS
ENGASE	0	0	0	0	0	0	Transport, Extracellular	Transport
ENGASE2	0	0	0	0	0	0	N-Glycan Degradation	Glycosylation
ENGASE2ly	0	0.0113377	0.00566884	0	0.0348071	0.0174035	N-Glycan Degradation	Glycosylation
ENMAN1g	0	0	0	0	0	0	N-Glycan Degradation	Glycosylation
ENMAN2g	0	0	0	0	0	0	N-Glycan Biosynthesis	Glycosylation
ENMAN3g	0	0	0	0	0	0	N-Glycan Biosynthesis	Glycosylation
ENMAN4g	0	0	0	0	0	0	N-Glycan Biosynthesis	Glycosylation
ENMAN5g	0	0	0	0	0	0	N-Glycan Biosynthesis	Glycosylation
ENMAN6g	0	0	0	0	0	0	N-Glycan Biosynthesis	Glycosylation
ENO	-0.060255	0.184362	0.0620534	-0.217245	0.47515	0.128953	N-Glycan Biosynthesis	Glycosylation
ESTRADIOLGLCt	0	0.328792	0.164396	0	1.00941	0.504703	Glycolysis/Gluconeogenesis	Central Metabolism
ESTRADIOLGLCt2	0	0.328792	0.164396	0	1.00941	0.504703	Transport, Extracellular	Transport
ESTRADIOLGLCtr	0	0	0	0	0	0	Transport, Extracellular	Transport
ESTRADIOLt	0	0	0	0	0	0	Transport, Endoplasmic Reticular	Transport
ESTRADIOLtr	0	0	0	0	0	0	Transport, Extracellular	Transport
ESTRIOLGLCte	0	0	0	0	0	0	Transport, Endoplasmic Reticular	Transport
ESTRIOLGLCtr	0	0	0	0	0	0	Transport, Extracellular	Transport
ESTRONEGLCt	0	0	0	0	0	0	Transport, Endoplasmic Reticular	Transport
ESTRONEGLCtr	0	0	0	0	0	0	Transport, Extracellular	Transport
ESTRONESt	0	0	0	0	0	0	Transport, Endoplasmic Reticular	Transport
ESTRONESt2	0	0	0	0	0	0	Transport, Extracellular	Transport
ESTRONEtr	0	0	0	0	0	0	Transport, Extracellular	Transport
ESTSULT	0	0.109597	0.0547987	0	0.336468	0.168234	Transport, Endoplasmic Reticular	Transport
ETF	0	0.591161	0.29558	0	0.596726	0.298363	Steroid Metabolism	Steriods
ETFQO	0	0.591161	0.29558	0	0.596726	0.298363	Fatty acid oxidation	UFAS
ETHAK	0	0.330431	0.165216	0	1.00941	0.504703	Fatty acid oxidation	UFAS
ETHP	0	0.328792	0.164396	0	1.00941	0.504703	Glycerophospholipid Metabolism	Lipids
ETOHMO	0	0	0	0	0	0	Glycerophospholipid Metabolism	Lipids
ETOHt	0	0	0	0	0	0	Glycolysis/Gluconeogenesis	Central Metabolism
ETOHtx	0	0	0	0	0	0	Transport, Extracellular	Transport
EX_10fthf(e)	0	0	0	0	0	0	Transport, Peroxisomal	Transport
EX_10fthf5glu(e)	0	0	0	0	0	0	[]	Transport
EX_10fthf6glu(e)	0	0	0	0	0	0	[]	Transport
EX_10fthf7glu(e)	0	0	0	0	0	0	[]	Transport
EX_11-cis-retfa(e)	0	0	0	0	0	0	[]	Transport
EX_13-cis-retnglc(e)	0	0	0	0	0	0	[]	Transport
EX_1glyc_hs(e)	0	0.0420632	0.0210316	0	0.130238	0.0651188	[]	Transport
EX_1mncam(e)	0	0	0	0	0	0	[]	Transport
EX_2425dhvitd2(e)	0	0	0	0	0	0	[]	Transport
EX_2425dhvitd3(e)	0	0.00486126	0.00243063	0	0.0147859	0.00739297	[]	Transport
EX_24nph(e)	0	0	0	0	0	0	[]	Transport
EX_25hvitd2(e)	0	0	0	0	0	0	[]	Transport
EX_25hvitd3(e)	0	0.00515547	0.00257774	0	0.0156432	0.0078216	[]	Transport
EX_2hb(e)	0	0.00838558	0.00419279	0	0.00506721	0.00253361	[]	Transport
EX_2mcit(e)	0	0.00838558	0.00419279	0	0.00506721	0.00253361	[]	Transport
EX_35cgmp(e)	0	0.0206424	0.0103212	0	0.0183256	0.0091628	[]	Transport
EX_3aib(e)	0	0.000626959	0.00031348	0	0.000124224	6.21118e-05	[]	Transport
EX_3mlda(e)	0	0.00584639	0.0029232	0	0.00611477	0.00305738	[]	Transport
EX_4abut(e)	0	0.0697299	0.0348649	0	0.091628	0.045814	[]	Transport
EX_4hdebrisoquine(e)	0	0	0	0	0	0	[]	Transport
EX_4hphac(e)	0	0	0	0	0.00253361	0.0012668	[]	Transport
EX_4mptnl(e)	0	0	0	0	0	0	[]	Transport
EX_4nph(e)	0	0	0	0	0	0	[]	Transport
EX_4nphsf(e)	0	0	0	0	0	0	[]	Transport
EX_4pyrdx(e)	0	0	0	0	0	0	[]	Transport
EX_5adtststerone(e)	0	0	0	0	0	0	[]	Transport
EX_5adtststeroneglc(e)	0	0	0	0	0	0	[]	Transport
EX_5dhf(e)	0	0	0	0	0	0	[]	Transport
EX_5fthf(e)	0	0	0	0	0	0	[]	Transport
EX_5htrp(e)	0	0.00811912	0.00405956	0	0.00725966	0.00362983	[]	Transport
EX_5mthf(e)	0	0	0	0	0	0	[]	Transport
EX_5thf(e)	0	0	0	0	0	0	[]	Transport
EX_6dhf(e)	0	0	0	0	0	0	[]	Transport
EX_6htststerone(e)	0	0	0	0	0	0	[]	Transport
EX_6thf(e)	0	0	0	0	0	0	[]	Transport
EX_7dhf(e)	0	0	0	0	0	0	[]	Transport
EX_7thf(e)	0	0	0	0	0	0	[]	Transport
EX_9-cis-retfa(e)	0	0	0	0	0	0	[]	Transport
EX_abt(e)	0	0.071116	0.035558	0	0.233329	0.116665	[]	Transport
EX_ac(e)	0	0.518135	0.259068	0	0.832297	0.416149	[]	Transport
EX_acac(e)	0	0.307198	0.153599	0	0.427535	0.213767	[]	Transport
EX_acald(e)	0	0	0	0	0	0	[]	Transport
EX_acetone(e)	0	0.321398	0.160699	0	0.427535	0.213767	[]	Transport
EX_acgalfucgalacgalfuc12gal14acglcgalgluside_hs(e)	0	0	0	0	0	0	[]	Transport
EX_acgalfucgalacgalfucgalacglcgal14acglcgalgluside_hs(e)	0	0	0	0	0	0	[]	Transport
EX_acgam(e)	0	0	0	0	0	0	[]	Transport
EX_ach(e)	0	0	0	0	0	0	[]	Transport
EX_acn13acngalgbside_hs(e)	0	0	0	0	0	0	[]	Transport
EX_acn23acngalgbside_hs(e)	0	0	0	0	0	0	[]	Transport
EX_acnacngal14acglcgalgluside_hs(e)	0	0	0	0	0	0	[]	Transport
EX_acnacngalgbside_hs(e)	0	0	0	0	0	0	[]	Transport
EX_acngalacglcgal14acglcgalgluside_hs(e)	0	0	0	0	0	0	[]	Transport
EX_ade(e)	0	0.0215302	0.0107651	0	0.0183256	0.0091628	[]	Transport
EX_adn(e)	0	0.0215302	0.0107651	0	0.0183256	0.0091628	[]	Transport
EX_adp	0	0	0	0	0	0	[]	Transport
EX_adprbp(e)	0	0	0	0	0	0	[]	Transport
EX_adprib(e)	0	0	0	0	0	0	[]	Transport
EX_adrn(e)	0	0	0	0	0	0	[]	Transport
EX_adrnl(e)	0	0	0	0	0	0	[]	Transport
EX_aflatoxin(e)	0	0	0	0	0	0	[]	Transport
EX_ahandrostanglc(e)	0	0	0	0	0	0	[]	Transport
EX_ak2lgchol_hs(e)	0	0	0	0	0	0	[]	Transport
EX_akg(e)	0	0.215523	0.107762	0	0.296921	0.148461	[]	Transport
EX_ala-B(e)	0	0	0	0	0	0	[]	Transport
EX_ala-D(e)	0	0.107651	0.0538255	0	0.091628	0.045814	[]	Transport
EX_ala-L(e)	0	0.107651	0.0538255	0	0.091628	0.045814	[]	Transport
EX_aldstrn(e)	0	0	0	0	0	0	[]	Transport
EX_amp(e)	0	0	0	0	0	0	[]	Transport
EX_andrstrn(e)	0	0	0	0	0	0	[]	Transport
EX_andrstrnglc(e)	0	0	0	0	0	0	[]	Transport
EX_aqcobal(e)	0	0	0	0	0	0	[]	Transport
EX_arab-L(e)	0	0	0	0	0	0	[]	Transport
EX_arach(e)	0	0	0	0	0	0	[]	Transport
EX_arachd(e)	0	0	0	0	0	0	[]	Transport
EX_arg-L(e)	-0.02375	0	-0.011875	-0.02375	0	-0.011875	[]	Transport
EX_ascb-L(e)	0	0	0	0	0	0	[]	Transport
EX_asn-L(e)	0	0.0538255	0.0269128	0	0.045814	0.022907	[]	Transport
EX_asp-D(e)	0	0	0	0	0	0	[]	Transport
EX_asp-L(e)	0	0	0	0	0	0	[]	Transport
EX_atp(e)	0	0	0	0	0	0	[]	Transport
EX_avite1(e)	0	0	0	0	0	0	[]	Transport
EX_avite2(e)	0	0	0	0	0	0	[]	Transport
EX_bhb(e)	0	0.385144	0.192572	0	0.591715	0.295858	[]	Transport
EX_bildglcur(e)	0	0	0	0	0	0	[]	Transport
EX_bilglcur(e)	0	0	0	0	0	0	[]	Transport
EX_bilirub(e)	0	0	0	0	0	0	[]	Transport
EX_biocyt(e)	0	0	0	0	0	0	[]	Transport
EX_btn(e)	0	0	0	0	0	0	[]	Transport
EX_but(e)	0	0	0	0	0	0	[]	Transport
EX_bvite(e)	0	0	0	0	0	0	[]	Transport
EX_bz(e)	0	0	0	0	0	0	[]	Transport
EX_ca2(e)	0	0	0	0	0	0	[]	Transport
EX_camp(e)	0	0.0214326	0.0107163	0	0.0183256	0.0091628	[]	Transport
EX_cca_d3(e)	0	0	0	0	0	0	[]	Transport
EX_cgly(e)	0	0.00315047	0.00157524	0	0.00185501	0.000927505	[]	Transport
EX_chol(e)	0	0.0278626	0.0139313	0	0.0831593	0.0415796	[]	Transport
EX_cholate(e)	0	0	0	0	0	0	[]	Transport
EX_chsterol(e)	0	0.00540449	0.00270225	0	0.0163802	0.00819008	[]	Transport
EX_chtn(e)	0	0	0	0	0	0	[]	Transport
EX_cit(e)	0	0.18658	0.0932902	0	0.296921	0.148461	[]	Transport
EX_cl(e)	0	0	0	0	0	0	[]	Transport
EX_CLPND(e)	0	0	0	0	0	0	[]	Transport
EX_cmp(e)	0	0	0	0	0	0	[]	Transport
EX_co(e)	0	0	0	0	0	0	[]	Transport
EX_co2(e)	0	10.5076	5.25382	0	10.6823	5.34117	[]	Transport
EX_coumarin(e)	0	0	0	0	0	0	[]	Transport
EX_creat(e)	0	0.046052	0.023026	0	0.0420461	0.021023	[]	Transport
EX_crmp_hs(e)	0	0.0549312	0.0274656	0	0.091628	0.045814	[]	Transport
EX_crn(e)	0	0	0	0	0	0	[]	Transport
EX_crtsl(e)	0	0	0	0	0	0	[]	Transport
EX_crtstrn(e)	0	0	0	0	0	0	[]	Transport
EX_crvnc(e)	0	0	0	0	0	0	[]	Transport
EX_csn(e)	0	0	0	0	0	0	[]	Transport
EX_cspg_a(e)	0	0	0	0	0	0	[]	Transport
EX_cspg_b(e)	0	0	0	0	0	0	[]	Transport
EX_cspg_c(e)	0	0	0	0	0	0	[]	Transport
EX_cspg_d(e)	0	0	0	0	0	0	[]	Transport
EX_cspg_e(e)	0	0	0	0	0	0	[]	Transport
EX_cyan(e)	0	0	0	0	0	0	[]	Transport
EX_cys-L(e)	0	0.00315047	0.00157524	0	0.00185501	0.000927505	[]	Transport
EX_cytd(e)	0	0.035406	0.017703	0	0.0305427	0.0152713	[]	Transport
EX_dad-2(e)	0	0.0215302	0.0107651	0	0.0183256	0.0091628	[]	Transport
EX_dag_hs(e)	0	0.068517	0.0342585	0	0.123863	0.0619313	[]	Transport
EX_dcsptn1(e)	0	0	0	0	0	0	[]	Transport
EX_dcyt(e)	0	0.0356289	0.0178144	0	0.0305427	0.0152713	[]	Transport
EX_debrisoquine(e)	0	0	0	0	0	0	[]	Transport
EX_dgchol(e)	0	0	0	0	0	0	[]	Transport
EX_dgsn(e)	0	0.0215302	0.0107651	0	0.0183256	0.0091628	[]	Transport
EX_dhdascb(e)	0	0	0	0	0	0	[]	Transport
EX_dheas(e)	0	0	0	0	0	0	[]	Transport
EX_dhf(e)	0	0	0	0	0	0	[]	Transport
EX_digalsgalside_hs(e)	0	0	0	0	0	0	[]	Transport
EX_din(e)	0	0.0257746	0.0128873	0	0.022907	0.0114535	[]	Transport
EX_dlnlcg(e)	0	0	0	0	0	0	[]	Transport
EX_dmhptcrn(e)	0	0	0	0	0	0	[]	Transport
EX_dopa(e)	0	0	0	0	0	0	[]	Transport
EX_dopasf(e)	0	0	0	0	0	0	[]	Transport
EX_drib(e)	0	0.0666697	0.0333349	0	0.218723	0.109362	[]	Transport
EX_duri(e)	0	0.036475	0.0182375	0	0.045814	0.022907	[]	Transport
EX_eaflatoxin(e)	0	0	0	0	0	0	[]	Transport
EX_ebastine(e)	0	0	0	0	0	0	[]	Transport
EX_ebastineoh(e)	0	0	0	0	0	0	[]	Transport
EX_eicostet(e)	0	0	0	0	0	0	[]	Transport
EX_elaid(e)	0	0.0894673	0.0447337	0	0.195676	0.0978382	[]	Transport
EX_estradiol(e)	0	0	0	0	0	0	[]	Transport
EX_estradiolglc(e)	0	0	0	0	0	0	[]	Transport
EX_estriolglc(e)	0	0	0	0	0	0	[]	Transport
EX_estroneglc(e)	0	0	0	0	0	0	[]	Transport
EX_estrones(e)	0	0	0	0	0	0	[]	Transport
EX_etoh(e)	0	0	0	0	0	0	[]	Transport
EX_fe2(e)	0	0	0	0	0	0	[]	Transport
EX_fol(e)	0	0	0	0	0	0	[]	Transport
EX_for(e)	0	0.00603759	0.00301879	0	0.0165429	0.00827143	[]	Transport
EX_fru(e)	0	0.115264	0.0576322	0	0.307186	0.153593	[]	Transport
EX_fuc-L(e)	0	0	0	0	0	0	[]	Transport
EX_fuc13galacglcgal14acglcgalgluside_hs(e)	0	0	0	0	0	0	[]	Transport
EX_fuc14galacglcgalgluside_hs(e)	0	0	0	0	0	0	[]	Transport
EX_fucacgalfucgalacglcgalgluside_hs(e)	0	0	0	0	0	0	[]	Transport
EX_fucacngal14acglcgalgluside_hs(e)	0	0	0	0	0	0	[]	Transport
EX_fucacngalacglcgalgluside_hs(e)	0	0	0	0	0	0	[]	Transport
EX_fucfuc12gal14acglcgalgluside_hs(e)	0	0	0	0	0	0	[]	Transport
EX_fucfuc132galacglcgal14acglcgalgluside_hs(e)	0	0	0	0	0	0	[]	Transport
EX_fucfucfucgalacglc13galacglcgal14acglcgalgluside_hs(e)	0	0	0	0	0	0	[]	Transport
EX_fucfucfucgalacglcgal14acglcgalgluside_hs(e)	0	0	0	0	0	0	[]	Transport
EX_fucfucgalacglcgalgluside_hs(e)	0	0	0	0	0	0	[]	Transport
EX_fucgal14acglcgalgluside_hs(e)	0	0	0	0	0	0	[]	Transport
EX_fucgalfucgalacglcgalgluside_hs(e)	0	0	0	0	0	0	[]	Transport
EX_fucgalgbside_hs(e)	0	0	0	0	0	0	[]	Transport
EX_gal(e)	0	0.0603202	0.0301601	0	0.19793	0.098965	[]	Transport
EX_galacglcgalgbside_hs(e)	0	0	0	0	0	0	[]	Transport
EX_galfuc12gal14acglcgalgluside_hs(e)	0	0	0	0	0	0	[]	Transport
EX_galfucgalacglcgal14acglcgalgluside_hs(e)	0	0	0	0	0	0	[]	Transport
EX_galgalfucfucgalacglcgalacglcgal14acglcgalgluside_hs(e)	0	0	0	0	0	0	[]	Transport
EX_galgalgalthcrm_hs(e)	0	0	0	0	0	0	[]	Transport
EX_gam(e)	0	0	0	0	0	0	[]	Transport
EX_gbside_hs(e)	0	0	0	0	0	0	[]	Transport
EX_gchola(e)	0	0	0	0	0	0	[]	Transport
EX_gd1b2_hs(e)	0	0	0	0	0	0	[]	Transport
EX_gd1c_hs(e)	0	0	0	0	0	0	[]	Transport
EX_gdchola(e)	0	0	0	0	0	0	[]	Transport
EX_gdp(e)	0	0	0	0	0	0	[]	Transport
EX_glc(e)	-0.2718	-0.156536	-0.214168	-0.2718	0.0353864	-0.118207	[]	Transport
EX_gln-L(e)	-0.0765	-0.0226745	-0.0495872	-0.0765	-0.030686	-0.053593	[]	Transport
EX_glu-L(e)	0	0.107651	0.0538255	0	0.091628	0.045814	[]	Transport
EX_gluala(e)	0	0.0538255	0.0269128	0	0.045814	0.022907	[]	Transport
EX_gly(e)	0	0.107651	0.0538255	0	0.091628	0.045814	[]	Transport
EX_glyb(e)	0	0.0262582	0.0131291	0	0.0775663	0.0387831	[]	Transport
EX_glyc-S(e)	0	0	0	0	0	0	[]	Transport
EX_glyc(e)	0	0.239086	0.119543	0	0.634268	0.317134	[]	Transport
EX_glygn2(e)	0	0	0	0	0	0	[]	Transport
EX_glygn4(e)	0	0	0	0	0	0	[]	Transport
EX_glygn5(e)	0	0	0	0	0	0	[]	Transport
EX_gmp(e)	0	0	0	0	0	0	[]	Transport
EX_gp1c_hs(e)	0	0	0	0	0	0	[]	Transport
EX_gp1calpha_hs(e)	0	0	0	0	0	0	[]	Transport
EX_gq1b_hs(e)	0	0	0	0	0	0	[]	Transport
EX_gq1balpha_hs(e)	0	0	0	0	0	0	[]	Transport
EX_gsn(e)	0	0.0215302	0.0107651	0	0.0183256	0.0091628	[]	Transport
EX_gt1a_hs(e)	0	0	0	0	0	0	[]	Transport
EX_gthox(e)	0	0	0	0	0	0	[]	Transport
EX_gthrd(e)	0	0	0	0	0	0	[]	Transport
EX_gtp(e)	0	0	0	0	0	0	[]	Transport
EX_gua(e)	0	0.0215302	0.0107651	0	0.0183256	0.0091628	[]	Transport
EX_h(e)	-10.204	0.52789	-4.83807	-10.3727	1.51261	-4.43005	[]	Transport
EX_h2o(e)	-0.231042	10.6925	5.23074	-0.752738	11.0618	5.15456	[]	Transport
EX_h2o2(e)	0	0.153457	0.0767285	0	0.435489	0.217744	[]	Transport
EX_ha_pre1(e)	0	0.032142	0.016071	0	0.091628	0.045814	[]	Transport
EX_ha(e)	0	0.016071	0.00803549	0	0.045814	0.022907	[]	Transport
EX_hco3(e)	-10	0.507632	-4.74618	-10	0.682331	-4.65883	[]	Transport
EX_hcoumarin(e)	0	0	0	0	0	0	[]	Transport
EX_hdca(e)	0	0.0549312	0.0274656	0	0.119183	0.0595915	[]	Transport
EX_hdcea(e)	0	0.0925288	0.0462644	0	0.231666	0.115833	[]	Transport
EX_hestratriol(e)	0	0	0	0	0	0	[]	Transport
EX_hexc(e)	0	0	0	0	0	0	[]	Transport
EX_his-L(e)	-0.01	-0.00415361	-0.0070768	-0.01	-0.00388523	-0.00694262	[]	Transport
EX_hista(e)	0	0.00584639	0.0029232	0	0.00611477	0.00305738	[]	Transport
EX_hom-L(e)	0	0	0	0	0	0	[]	Transport
EX_hpdca(e)	0	0	0	0	0	0	[]	Transport
EX_hspg(e)	0	0	0	0	0	0	[]	Transport
EX_hxan(e)	0	0.0269128	0.0134564	0	0.022907	0.0114535	[]	Transport
EX_i(e)	0	0	0	0	0	0	[]	Transport
EX_idp(e)	0	0	0	0	0	0	[]	Transport
EX_ile-L(e)	-0.00700627	-0.00700627	-0.00700627	-0.00746361	-0.00746361	-0.00746361	[]	Transport
EX_imp(e)	0	0	0	0	0	0	[]	Transport
EX_inost(e)	0	0.0897623	0.0448812	0	0.282279	0.14114	[]	Transport
EX_ins(e)	0	0.0269128	0.0134564	0	0.022907	0.0114535	[]	Transport
EX_k(e)	0	0	0	0	0	0	[]	Transport
EX_ksi_deg1(e)	0	0	0	0	0	0	[]	Transport
EX_ksi(e)	0	0	0	0	0	0	[]	Transport
EX_ksii_core2(e)	0	0	0	0	0	0	[]	Transport
EX_ksii_core4(e)	0	0	0	0	0	0	[]	Transport
EX_lac-D(e)	0	0.144324	0.0721619	0	0.47444	0.23722	[]	Transport
EX_lac-L(e)	0	0.332296	0.166148	0	0.746956	0.373478	[]	Transport
EX_lcts(e)	0	0.0400028	0.0200014	0	0.130996	0.0654978	[]	Transport
EX_Lcystin(e)	0	0	0	0	0	0	[]	Transport
EX_leu-L(e)	-0.0362216	-0.015674	-0.0259478	-0.0362216	-0.0125698	-0.0243957	[]	Transport
EX_leuktrA4(e)	0	0	0	0	0	0	[]	Transport
EX_leuktrB4(e)	0	0	0	0	0	0	[]	Transport
EX_leuktrC4(e)	0	0	0	0	0	0	[]	Transport
EX_leuktrD4(e)	0	0	0	0	0	0	[]	Transport
EX_leuktrE4(e)	0	0	0	0	0	0	[]	Transport
EX_leuktrF4(e)	0	0	0	0	0	0	[]	Transport
EX_lgnc(e)	0	0	0	0	0	0	[]	Transport
EX_lipoate(e)	0	0	0	0	0	0	[]	Transport
EX_lneldc(e)	0	0.0540587	0.0270293	0	0.136062	0.068031	[]	Transport
EX_lnlc(e)	0	0	0	0	0	0	[]	Transport
EX_lnlnca(e)	0	0	0	0	0	0	[]	Transport
EX_lnlncg(e)	0	0	0	0	0	0	[]	Transport
EX_lpchol_hs(e)	0	0.0190994	0.0095497	0	0.0574167	0.0287084	[]	Transport
EX_lys-L(e)	-0.00949843	-0.00949843	-0.00949843	-0.00847131	-0.00847131	-0.00847131	[]	Transport
EX_mag_hs(e)	0	0.10887	0.0544348	0	0.241643	0.120821	[]	Transport
EX_malt(e)	0	0	0	0	0	0	[]	Transport
EX_man(e)	0	0.0581485	0.0290742	0	0.190804	0.0954019	[]	Transport
EX_meoh(e)	0	0.00605264	0.00302632	0	0.016606	0.00830299	[]	Transport
EX_mepi(e)	0	0	0	0	0	0	[]	Transport
EX_mercplaccys(e)	0	0.00157524	0.000787618	0	0.000927505	0.000463753	[]	Transport
EX_met-L(e)	-0.01	-0.00684953	-0.00842476	-0.01	-0.00814499	-0.00907249	[]	Transport
EX_mthgxl(e)	0	0.144324	0.0721619	0	0.47444	0.23722	[]	Transport
EX_n2m2nmasn(e)	0	0	0	0	0	0	[]	Transport
EX_na1(e)	0	0	0	0	0	0	[]	Transport
EX_nac(e)	0	0	0	0	0	0	[]	Transport
EX_nad(e)	0	0	0	0	0	0	[]	Transport
EX_nadp(e)	0	0	0	0	0	0	[]	Transport
EX_ncam(e)	0	0	0	0	0	0	[]	Transport
EX_nh4(e)	0	0.107651	0.0538255	0	0.091628	0.045814	[]	Transport
EX_no(e)	0	0.0347789	0.0173894	0	0.091628	0.045814	[]	Transport
EX_npthl(e)	0	0	0	0	0	0	[]	Transport
EX_nrpphr(e)	0	0	0	0	0	0	[]	Transport
EX_nrpphrsf(e)	0	0	0	0	0	0	[]	Transport
EX_nrvnc(e)	0	0	0	0	0	0	[]	Transport
EX_o2(e)	-0.3066	-0.219412	-0.263006	-0.3066	-0.0618487	-0.184224	[]	Transport
EX_o2s(e)	0	0.102305	0.0511523	0	0.290326	0.145163	[]	Transport
EX_oagd3_hs(e)	0	0	0	0	0	0	[]	Transport
EX_oagt3_hs(e)	0	0	0	0	0	0	[]	Transport
EX_ocdca(e)	-0.0949483	-0.00012787	-0.0475381	-0.1	0	-0.05	[]	Transport
EX_ocdcea(e)	-0.0192	-0.000104017	-0.00965201	-0.0192	0	-0.0096	[]	Transport
EX_octa(e)	0	0	0	0	0	0	[]	Transport
EX_oh1	0	0	0	0	0	0	[]	Transport
EX_onpthl(e)	0	0	0	0	0	0	[]	Transport
EX_orn(e)	0	0	0	0	0	0	[]	Transport
EX_oxa(e)	0	0	0	0	0	0	[]	Transport
EX_paf_hs(e)	0	0	0	0	0	0	[]	Transport
EX_pchol_hs(e)	0	0.0165974	0.00829872	0	0.0493009	0.0246504	[]	Transport
EX_pe_hs(e)	0	0.0344693	0.0172347	0	0.091628	0.045814	[]	Transport
EX_peplys(e)	0	0	0	0	0	0	[]	Transport
EX_pglyc_hs(e)	0	0.0342585	0.0171292	0	0.101809	0.0509047	[]	Transport
EX_phe-L(e)	-0.01	-0.01	-0.01	-0.01	-0.00746639	-0.0087332	[]	Transport
EX_pheme(e)	0	0	0	0	0	0	[]	Transport
EX_phyQ(e)	0	0	0	0	0	0	[]	Transport
EX_phyt(e)	0	0	0	0	0	0	[]	Transport
EX_pi(e)	-0.0997602	-0.00913814	-0.0544492	-0.217963	-0.0200167	-0.11899	[]	Transport
EX_pnto-R(e)	0	0	0	0	0	0	[]	Transport
EX_ppa(e)	0	0	0	0	0	0	[]	Transport
EX_prgstrn(e)	0	0	0	0	0	0	[]	Transport
EX_pro-D(e)	0	0	0	0	0	0	[]	Transport
EX_pro-L(e)	0	0.107651	0.0538255	0	0.091628	0.045814	[]	Transport
EX_prostgd2(e)	0	0	0	0	0	0	[]	Transport
EX_prostge1(e)	0	0	0	0	0	0	[]	Transport
EX_prostge2(e)	0	0	0	0	0	0	[]	Transport
EX_prostgf2(e)	0	0	0	0	0	0	[]	Transport
EX_ps_hs(e)	0	0.0374667	0.0187333	0	0.091628	0.045814	[]	Transport
EX_ptdca(e)	0	0	0	0	0	0	[]	Transport
EX_pydam(e)	0	0	0	0	0	0	[]	Transport
EX_pydx(e)	0	0	0	0	0	0	[]	Transport
EX_pydxn(e)	0	0	0	0	0	0	[]	Transport
EX_pyr(e)	-0.0568	0.268217	0.105709	-0.0568	0.576773	0.259986	[]	Transport
EX_retfa(e)	0	0	0	0	0	0	[]	Transport
EX_retinol-9-cis(e)	0	0	0	0	0	0	[]	Transport
EX_retinol-cis-11(e)	0	0	0	0	0	0	[]	Transport
EX_retinol(e)	0	0	0	0	0	0	[]	Transport
EX_retn(e)	0	0	0	0	0	0	[]	Transport
EX_retnglc(e)	0	0	0	0	0	0	[]	Transport
EX_rib-D(e)	0	0	0	0	0	0	[]	Transport
EX_ribflv(e)	0	0	0	0	0	0	[]	Transport
EX_Rtotal(e)	0	0.170022	0.0850109	0	0.25351	0.126755	[]	Transport
EX_Rtotal2(e)	0	0.170022	0.0850109	0	0.25351	0.126755	[]	Transport
EX_Rtotal3(e)	0	0.170022	0.0850109	0	0.25351	0.126755	[]	Transport
EX_s2l2fn2m2masn(e)	0	0	0	0	0	0	[]	Transport
EX_s2l2n2m2masn(e)	0	0	0	0	0	0	[]	Transport
EX_sarcs(e)	0	0	0	0	0	0	[]	Transport
EX_sel(e)	0	0	0	0	0	0	[]	Transport
EX_ser-D(e)	0	0	0	0	0	0	[]	Transport
EX_ser-L(e)	0	0.107651	0.0538255	0	0.091628	0.045814	[]	Transport
EX_sl-L(e)	0	0	0	0	0	0	[]	Transport
EX_so4(e)	0	0	0	-0.00253361	0	-0.0012668	[]	Transport
EX_spc_hs(e)	0	0.0187791	0.00938953	0	0.0466585	0.0233293	[]	Transport
EX_sph1p(e)	0	0.0818498	0.0409249	0	0.091628	0.045814	[]	Transport
EX_sphs1p(e)	0	0.0549312	0.0274656	0	0.091628	0.045814	[]	Transport
EX_srtn(e)	0	0.00811912	0.00405956	0	0.00725966	0.00362983	[]	Transport
EX_strch1(e)	0	0	0	0	0	0	[]	Transport
EX_strch2(e)	0	0	0	0	0	0	[]	Transport
EX_strdnc(e)	0	0	0	0	0	0	[]	Transport
EX_succ(e)	0	0.284384	0.142192	0	0.296921	0.148461	[]	Transport
EX_tag_hs(e)	0	0.0491037	0.0245519	0	0.0832384	0.0416192	[]	Transport
EX_tagat-D(e)	0	0	0	0	0	0	[]	Transport
EX_taur(e)	0	0.00315047	0.00157524	0	0.00185501	0.000927505	[]	Transport
EX_tchola(e)	0	0	0	0	0	0	[]	Transport
EX_tcynt(e)	0	0	0	0	0	0	[]	Transport
EX_tdchola(e)	0	0	0	0	0	0	[]	Transport
EX_tethex3(e)	0	0	0	0	0	0	[]	Transport
EX_tetpent3(e)	0	0	0	0	0	0	[]	Transport
EX_tetpent6(e)	0	0	0	0	0	0	[]	Transport
EX_tettet6(e)	0	0	0	0	0	0	[]	Transport
EX_thf(e)	0	0	0	0	0	0	[]	Transport
EX_thm(e)	0	0	0	0	0	0	[]	Transport
EX_thmmp(e)	0	0	0	0	0	0	[]	Transport
EX_thmtp(e)	0	0	0	0	0	0	[]	Transport
EX_thr-L(e)	-0.01	-0.00819749	-0.00909875	-0.01	-0.01	-0.01	[]	Transport
EX_thym(e)	0	0.0481991	0.0240995	0	0.045814	0.022907	[]	Transport
EX_thymd(e)	0	0	0	0	0	0	[]	Transport
EX_thyox-L(e)	0	0	0	0	0	0	[]	Transport
EX_tmndnc(e)	0	0	0	0	0	0	[]	Transport
EX_tre(e)	0	0	0	0	0	0	[]	Transport
EX_triodthy(e)	0	0	0	0	0	0	[]	Transport
EX_triodthysuf(e)	0	0	0	0	0	0	[]	Transport
EX_trp-L(e)	-0.01	-0.00188088	-0.00594044	-0.01	-0.00274034	-0.00637017	[]	Transport
EX_tststerone(e)	0	0	0	0	0	0	[]	Transport
EX_tststeroneglc(e)	0	0	0	0	0	0	[]	Transport
EX_tsul(e)	0	0	0	0	0	0	[]	Transport
EX_ttdca(e)	-0.1	-3.67582e-05	-0.0500184	-0.1	0	-0.05	[]	Transport
EX_txa2(e)	0	0	0	0	0	0	[]	Transport
EX_tymsf(e)	0	0	0	0	0.00253361	0.0012668	[]	Transport
EX_Tyr-ggn(e)	0	0	0	0	0	0	[]	Transport
EX_tyr-L(e)	0	0	0	0	0.00253361	0.0012668	[]	Transport
EX_udp(e)	0	0	0	0	0	0	[]	Transport
EX_ump(e)	0	0	0	0	0	0	[]	Transport
EX_ura(e)	0	0.053784	0.026892	0	0.045814	0.022907	[]	Transport
EX_urate(e)	0	0	0	0	0	0	[]	Transport
EX_urea(e)	0	0.0687824	0.0343912	0	0.0622246	0.0311123	[]	Transport
EX_uri(e)	0	0.0405508	0.0202754	0	0.045814	0.022907	[]	Transport
EX_utp(e)	0	0	0	0	0	0	[]	Transport
EX_vacc(e)	0	0.0894673	0.0447337	0	0.195676	0.0978382	[]	Transport
EX_val-L(e)	-0.01	-0.00937304	-0.00968652	-0.01	-0.00987578	-0.00993789	[]	Transport
EX_vitd2(e)	0	0	0	0	0	0	[]	Transport
EX_vitd3(e)	0	0.0054876	0.0027438	0	0.016606	0.00830299	[]	Transport
EX_xolest_hs(e)	0	0.0053465	0.00267325	0	0.0162139	0.00810695	[]	Transport
EX_xoltri24(e)	0	0	0	0	0	0	[]	Transport
EX_xoltri25(e)	0	0	0	0	0	0	[]	Transport
EX_xoltri27(e)	0	0.00488102	0.00244051	0	0.0148527	0.00742634	[]	Transport
EX_xylt(e)	0	0.071116	0.035558	0	0.233329	0.116665	[]	Transport
EX_yvite(e)	0	0	0	0	0	0	[]	Transport
F1Atg	0	0	0	0	0	0	[]	Transport
F1PGT	0	0	0	0	0	0	Transport, Golgi Apparatus	Transport
F6Tg	0	0	0	0	0	0	Fructose and Mannose Metabolism	Glycosylation
FACOAL140i	0	0.0999632	0.0499816	0	0.1	0.05	N-Glycan Biosynthesis	Glycosylation
FACOAL150	0	0	0	0	0	0	Fatty acid activation	FAS
FACOAL160i	0	0.0531382	0.0265691	0	0.115978	0.0579891	Fatty acid activation	FAS
FACOAL161	-0.0925618	-3.29962e-05	-0.0462974	-0.231666	0	-0.115833	Fatty acid activation	FAS
FACOAL170	0	0	0	0	0	0	Fatty acid activation	FAS
FACOAL180i	0	0.0948204	0.0474102	0	0.1	0.05	Fatty acid activation	FAS
FACOAL1812	-0.0894673	0	-0.0447337	-0.195676	0	-0.0978382	Fatty acid activation	FAS
FACOAL1813	-0.0894673	0	-0.0447337	-0.195676	0	-0.0978382	Fatty acid activation	FAS
FACOAL181i	0	0.019096	0.00954799	0	0.0192	0.0096	Fatty acid activation	FAS
FACOAL1821	0	0	0	0	0	0	Fatty acid activation	FAS
FACOAL1822	-0.0540587	0	-0.0270293	-0.136062	0	-0.068031	Fatty acid activation	FAS
FACOAL1831	0	0	0	0	0	0	Fatty acid activation	FAS
FACOAL1832	0	0	0	0	0	0	Fatty acid activation	FAS
FACOAL184	0	0	0	0	0	0	Fatty acid activation	FAS
FACOAL191	0	0.164396	0.0821981	0	0.504703	0.252351	Fatty acid activation	FAS
FACOAL200	0	0	0	0	0	0	Fatty acid activation	FAS
FACOAL203	0	0	0	0	0	0	Fatty acid activation	FAS
FACOAL204	0	0	0	0	0	0	Fatty acid activation	FAS
FACOAL2042	0	0	0	0	0	0	Fatty acid activation	FAS
FACOAL204i	0	0	0	0	0	0	Fatty acid activation	FAS
FACOAL205	0	0	0	0	0	0	Fatty acid activation	FAS
FACOAL206	0	0	0	0	0	0	Fatty acid activation	FAS
FACOAL224	0	0	0	0	0	0	Fatty acid activation	FAS
FACOAL2251	0	0	0	0	0	0	Fatty acid activation	FAS
FACOAL2252	0	0	0	0	0	0	Fatty acid activation	FAS
FACOAL226	0	0	0	0	0	0	Fatty acid activation	FAS
FACOAL226i	0	0	0	0	0	0	Fatty acid activation	FAS
FACOAL240	0	0	0	0	0	0	Fatty acid activation	FAS
FACOAL241	0	0	0	0	0	0	Fatty acid activation	FAS
FACOAL244_1	0	0	0	0	0	0	Fatty acid activation	FAS
FACOAL245_1	0	0	0	0	0	0	Fatty acid activation	FAS
FACOAL245_2	0	0	0	0	0	0	Fatty acid activation	FAS
FACOAL246_1	0	0	0	0	0	0	Fatty acid activation	FAS
FACOAL260	0	0	0	0	0	0	Fatty acid activation	FAS
FACOAL80i	0	0	0	0	0	0	Fatty acid activation	FAS
FADH2tru	0.000565042	0.00605264	0.00330884	0	0.016606	0.00830299	Fatty acid activation	FAS
FADH2tx	0	0	0	0	0	0	Transport, Endoplasmic Reticular	Transport
FADtru	0.000565042	0.00605264	0.00330884	0	0.016606	0.00830299	Transport, Peroxisomal	Transport
FADtx	0	0	0	0	0	0	Transport, Endoplasmic Reticular	Transport
FALDH	-0.00605264	0	-0.00302632	-0.016606	0	-0.00830299	Transport, Peroxisomal	Transport
FALDtly	0	0.159093	0.0795466	0	0.45505	0.227525	Tyrosine metabolism	Amino Acids
FALDtm	0	0	0	0	0	0	Transport, Lysosomal	Transport
FAOXC11	0	0	0	0	0	0	Transport, Mitochondrial	Transport
FAOXC140	0	0.0399866	0.0199933	0	0.0399866	0.0199933	Fatty acid oxidation	UFAS
FAOXC150m	0	0	0	0	0	0	Fatty acid oxidation	UFAS
FAOXC160	0	0.0740729	0.0370364	0	0.130389	0.0651946	Fatty acid oxidation	UFAS
FAOXC16080m	0	0.0740729	0.0370364	0	0.130389	0.0651946	Fatty acid oxidation	UFAS
FAOXC16080x	0	0	0	0	0	0	Fatty acid oxidation	UFAS
FAOXC161802m	0	0.0399866	0.0199933	0	0.0399866	0.0199933	Fatty acid oxidation, peroxisome	UFAS
FAOXC16180m	0	0.0399866	0.0199933	0	0.0399866	0.0199933	Fatty acid activation	FAS
FAOXC170m	0	0	0	0	0	0	Fatty acid oxidation	UFAS
FAOXC180	0	0.0644223	0.0322111	0	0.11409	0.0570452	Fatty acid oxidation	UFAS
FAOXC180x	0	0	0	0	0	0	Fatty acid oxidation	UFAS
FAOXC1811601m	0	0.0399866	0.0199933	0	0.0399866	0.0199933	Fatty acid oxidation, peroxisome	UFAS
FAOXC1811602m	0	0.0399866	0.0199933	0	0.0399866	0.0199933	Fatty acid oxidation	UFAS
FAOXC1811603m	0	0.0526093	0.0263047	0	0.103547	0.0517735	Fatty acid oxidation	UFAS
FAOXC182806m	0	0	0	0	0	0	Fatty acid oxidation	UFAS
FAOXC18280m	0	0.0399866	0.0199933	0	0.0399866	0.0199933	Fatty acid oxidation	UFAS
FAOXC183803m	0	0	0	0	0	0	Fatty acid oxidation	UFAS
FAOXC183806m	0	0	0	0	0	0	Fatty acid oxidation	UFAS
FAOXC183806x	0	0	0	0	0	0	Fatty acid oxidation	UFAS
FAOXC18480m	0	0	0	0	0	0	Fatty acid oxidation, peroxisome	UFAS
FAOXC18480x	0	0	0	0	0	0	Fatty acid oxidation	UFAS
FAOXC200180m	0	0	0	0	0	0	Fatty acid oxidation, peroxisome	UFAS
FAOXC200180x	0	0	0	0	0	0	Fatty acid oxidation	UFAS
FAOXC2031836m	0	0	0	0	0	0	Fatty acid oxidation, peroxisome	UFAS
FAOXC204	0	0	0	0	0	0	Fatty acid oxidation	UFAS
FAOXC204184m	0	0	0	0	0	0	Fatty acid oxidation	UFAS
FAOXC2051843m	0	0	0	0	0	0	Fatty acid oxidation	UFAS
FAOXC2051843x	0	0	0	0	0	0	Fatty acid oxidation	UFAS
FAOXC2242046m	0	0	0	0	0	0	Fatty acid oxidation, peroxisome	UFAS
FAOXC2242046x	0	0	0	0	0	0	Fatty acid oxidation	UFAS
FAOXC2251836m	0	0	0	0	0	0	Fatty acid oxidation, peroxisome	UFAS
FAOXC2251836x	0	0	0	0	0	0	Fatty acid oxidation	UFAS
FAOXC2252053m	0	0	0	0	0	0	Fatty acid oxidation, peroxisome	UFAS
FAOXC2252053x	0	0	0	0	0	0	Fatty acid oxidation	UFAS
FAOXC226	0	0	0	0	0	0	Fatty acid oxidation, peroxisome	UFAS
FAOXC226205m	0	0	0	0	0	0	Fatty acid oxidation	UFAS
FAOXC226205x	0	0	0	0	0	0	Fatty acid oxidation	UFAS
FAOXC240200x	0	0	0	0	0	0	Fatty acid oxidation, peroxisome	UFAS
FAOXC241181x	0	0	0	0	0	0	Fatty acid oxidation, peroxisome	UFAS
FAOXC2442246x	0	0	0	0	0	0	Fatty acid oxidation, peroxisome	UFAS
FAOXC2452253x	0	0	0	0	0	0	Fatty acid oxidation, peroxisome	UFAS
FAOXC2452256x	0	0	0	0	0	0	Fatty acid oxidation, peroxisome	UFAS
FAOXC246226x	0	0	0	0	0	0	Fatty acid oxidation, peroxisome	UFAS
FAOXC260240x	0	0	0	0	0	0	Fatty acid oxidation, peroxisome	UFAS
FAOXC80	0	0.0740729	0.0370364	0	0.176445	0.0882227	Fatty acid oxidation, peroxisome	UFAS
FAS100COA	0	0.0264415	0.0132207	0	0.0754798	0.0377399	Fatty acid oxidation	UFAS
FAS120COA	0	0.0264415	0.0132207	0	0.0754798	0.0377399	Fatty acid elongation	FAS
FAS140COA	0	0.0264415	0.0132207	0	0.0754798	0.0377399	Fatty acid elongation	FAS
FAS160COA	0	0.0861442	0.0430721	0	0.142286	0.0711432	Fatty acid elongation	FAS
FAS180COA	0	0.0996358	0.0498179	0	0.23649	0.118245	Fatty acid elongation	FAS
FAS80COA_L	0	0.049817	0.0249085	0	0.15294	0.0764701	Fatty acid elongation	FAS
FATP1t	0	0	0	0	0	0	Fatty acid elongation	FAS
FATP2t	0	0	0	0	0	0	Transport, Extracellular	Transport
FATP3t	-0.00012787	-0.00012787	-0.00012787	0	0	0	Transport, Extracellular	Transport
FATP4t	0	0	0	0	0	0	Transport, Extracellular	Transport
FATP5t	0	0	0	0	0	0	Transport, Extracellular	Transport
FATP6t	0	0	0	0	0	0	Transport, Extracellular	Transport
FATP7t	0	0	0	0	0	0	Transport, Extracellular	Transport
FATP8t	0	0	0	0	0	0	Transport, Extracellular	Transport
FATP9t	0	0	0	0	0	0	Transport, Extracellular	Transport
FBA	-0.245128	0.110336	-0.0673961	-0.511374	0.258458	-0.126458	Transport, Extracellular	Transport
FBA2	0	0.355464	0.177732	0	0.769832	0.384916	Glycolysis/Gluconeogenesis	Central Metabolism
FBA4	0	0	0	0	0	0	Fructose and Mannose Metabolism	Glycosylation
FBP	0	0.328792	0.164396	0	1.00941	0.504703	Glyoxylate and Dicarboxylate Metabolism	Central Metabolism
FBP26	0	0.328792	0.164396	0	1.00941	0.504703	Glycolysis/Gluconeogenesis	Central Metabolism
FCLTm	0	0	0	0	0	0	Fructose and Mannose Metabolism	Glycosylation
FE2t	0	0	0	0	0	0	Heme Biosynthesis	Heme
FE2tm	0	0	0	0	0	0	Transport, Extracellular	Transport
FK	0	0	0	0	0	0	Transport, Mitochondrial	Transport
FMNAT	0	0	0	0	0	0	Fructose and Mannose Metabolism	Glycosylation
FOLR2	0	0	0	0	0	0	Riboflavin Metabolism	Vitamins
FOLt2	0	0	0	0	0	0	Folate Metabolism	Vitamins
FORt2m	-0.00597075	0	-0.00298538	-0.0163583	0	-0.00817915	Transport, Extracellular	Transport
FORtr	-0.00605264	-0.000565042	-0.00330884	-0.016606	0	-0.00830299	Transport, Mitochondrial	Transport
FORtrn	0	0	0	0	0	0	Transport, Endoplasmic Reticular	Transport
FPGS	0	0.0821981	0.0410991	0	0.252351	0.126176	Transport, Nuclear	Transport
FPGS2	0	0.0657585	0.0328792	0	0.201881	0.100941	Folate Metabolism	Vitamins
FPGS2m	0	0.0657585	0.0328792	0	0.201881	0.100941	Folate Metabolism	Vitamins
FPGS3	0	0.0547987	0.0273994	0	0.168234	0.0841171	Folate Metabolism	Vitamins
FPGS3m	0	0.0547987	0.0273994	0	0.168234	0.0841171	Folate Metabolism	Vitamins
FPGS4	0	0.0821981	0.0410991	0	0.252351	0.126176	Folate Metabolism	Vitamins
FPGS4m	0	0.0657585	0.0328792	0	0.201881	0.100941	Folate Metabolism	Vitamins
FPGS5	0	0.0657585	0.0328792	0	0.201881	0.100941	Folate Metabolism	Vitamins
FPGS5m	0	0.0657585	0.0328792	0	0.201881	0.100941	Folate Metabolism	Vitamins
FPGS6	0	0.0547987	0.0273994	0	0.168234	0.0841171	Folate Metabolism	Vitamins
FPGS6m	0	0.0547987	0.0273994	0	0.168234	0.0841171	Folate Metabolism	Vitamins
FPGS7	0	0.0821981	0.0410991	0	0.252351	0.126176	Folate Metabolism	Vitamins
FPGS7m	0	0.0821981	0.0410991	0	0.252351	0.126176	Folate Metabolism	Vitamins
FPGS8	0	0.0657585	0.0328792	0	0.201881	0.100941	Folate Metabolism	Vitamins
FPGS8m	0	0.0657585	0.0328792	0	0.201881	0.100941	Folate Metabolism	Vitamins
FPGS9	0	0.0547987	0.0273994	0	0.168234	0.0841171	Folate Metabolism	Vitamins
FPGS9m	0	0.0547987	0.0273994	0	0.168234	0.0841171	Folate Metabolism	Vitamins
FPGSm	0	0.0821981	0.0410991	0	0.252351	0.126176	Folate Metabolism	Vitamins
FRDPtc	0	0	0	0	0	0	Folate Metabolism	Vitamins
FRDPtr	0.00113008	0.0121053	0.00661769	0	0.033212	0.016606	Transport, Peroxisomal	Transport
FRTT	0	0	0	0	0	0	Transport, Peroxisomal	Transport
FRUt1r	0	0	0	0	0	0	Cholesterol Metabolism	Steriods
FRUt4	0	0	0	0	0	0	Transport, Extracellular	Transport
FT	0	0	0	0	0	0	Transport, Extracellular	Transport
FTCD	0	0.00584639	0.0029232	0	0.00611477	0.00305738	N-Glycan Biosynthesis	Glycosylation
FTHFCL	0	0	0	0	0	0	Folate Metabolism	Vitamins
FTHFDH	0	0.270913	0.135456	0	0.418402	0.209201	Folate Metabolism	Vitamins
FTHFL	0	0.00593184	0.00296592	0	0.0162578	0.00812888	Folate Metabolism	Vitamins
FTHFLm	0	0.00597075	0.00298538	0	0.0163583	0.00817915	Folate Metabolism	Vitamins
FUC13GALACGLCGAL14ACGLCGALGLUSIDEte	0	0	0	0	0	0	Folate Metabolism	Vitamins
FUC13GALACGLCGAL14ACGLCGALGLUSIDEtg	0	0	0	0	0	0	Transport, Extracellular	Transport
FUC14GALACGLCGALGLUSIDEte	0	0	0	0	0	0	Transport, Golgi Apparatus	Transport
FUC14GALACGLCGALGLUSIDEtg	0	0	0	0	0	0	Transport, Extracellular	Transport
FUCACGALFUCGALACGLCGALGLUSIDEte	0	0	0	0	0	0	Transport, Golgi Apparatus	Transport
FUCACGALFUCGALACGLCGALGLUSIDEtg	0	0	0	0	0	0	Transport, Extracellular	Transport
FUCACNGAL14ACGLCGALGLUSIDEte	0	0	0	0	0	0	Transport, Golgi Apparatus	Transport
FUCACNGAL14ACGLCGALGLUSIDEtg	0	0	0	0	0	0	Transport, Extracellular	Transport
FUCACNGALACGLCGALGLUSIDEte	0	0	0	0	0	0	Transport, Golgi Apparatus	Transport
FUCACNGALACGLCGALGLUSIDEtg	0	0	0	0	0	0	Transport, Extracellular	Transport
FUCASE2e	0	0	0	0	0	0	Transport, Golgi Apparatus	Transport
FUCASE2ly	0	0	0	0	0	0	Keratan sulfate degradation	Glycosylation
FUCASEe	0	0	0	0	0	0	Keratan sulfate degradation	Glycosylation
FUCASEly	0	0	0	0	0	0	N-Glycan Degradation	Glycosylation
FUCFUC12GAL14ACGLCGALGLUSIDEte	0	0	0	0	0	0	N-Glycan Degradation	Glycosylation
FUCFUC12GAL14ACGLCGALGLUSIDEtg	0	0	0	0	0	0	Transport, Extracellular	Transport
FUCFUC132GALACGLCGAL14ACGLCGALGLUSIDEte	0	0	0	0	0	0	Transport, Golgi Apparatus	Transport
FUCFUC132GALACGLCGAL14ACGLCGALGLUSIDEtg	0	0	0	0	0	0	Transport, Extracellular	Transport
FUCFUCFUCGALACGLC13GALACGLCGAL14ACGLCGALGLUSIDEte	0	0	0	0	0	0	Transport, Golgi Apparatus	Transport
FUCFUCFUCGALACGLC13GALACGLCGAL14ACGLCGALGLUSIDEtg	0	0	0	0	0	0	Transport, Extracellular	Transport
FUCFUCFUCGALACGLCGAL14ACGLCGALGLUSIDEte	0	0	0	0	0	0	Transport, Golgi Apparatus	Transport
FUCFUCFUCGALACGLCGAL14ACGLCGALGLUSIDEtg	0	0	0	0	0	0	Transport, Extracellular	Transport
FUCFUCGALACGLCGALGLUSIDEte	0	0	0	0	0	0	Transport, Golgi Apparatus	Transport
FUCFUCGALACGLCGALGLUSIDEtg	0	0	0	0	0	0	Transport, Extracellular	Transport
FUCGAL14ACGLCGALGLUSIDEte	0	0	0	0	0	0	Transport, Golgi Apparatus	Transport
FUCGAL14ACGLCGALGLUSIDEtg	0	0	0	0	0	0	Transport, Extracellular	Transport
FUCGALFUCGALACGLCGALGLUSIDEte	0	0	0	0	0	0	Transport, Golgi Apparatus	Transport
FUCGALFUCGALACGLCGALGLUSIDEtg	0	0	0	0	0	0	Transport, Extracellular	Transport
FUCGALGBSIDEte	0	0	0	0	0	0	Transport, Golgi Apparatus	Transport
FUCGALGBSIDEtg	0	0	0	0	0	0	Transport, Extracellular	Transport
FUCtly	0	0	0	0	0	0	Transport, Golgi Apparatus	Transport
FUM	-0.0540076	-0.0828598	-0.0684337	-0.0639775	-0.0904107	-0.0771941	Transport, Lysosomal	Transport
FUMAC	0	0	0	0	0	0	Citric Acid Cycle	Central Metabolism
FUMm	0.0820454	0.132787	0.107416	0.119248	0.125363	0.122306	Tyrosine metabolism	Amino Acids
FUMSO3tm	0	0	0	0	0	0	Citric Acid Cycle	Central Metabolism
FUMSO4tm	0	0	0	0	0	0	Transport, Mitochondrial	Transport
FUMtm	0.0599591	0.088231	0.0740951	0.0992121	0.105327	0.102269	Transport, Mitochondrial	Transport
FUMTSULtm	0	0	0	0	0	0	Transport, Mitochondrial	Transport
FUT11g	0	0	0	0	0	0	Transport, Mitochondrial	Transport
FUT12g	0	0	0	0	0	0	Sphingolipid Metabolism	Lipids
FUT14g	0	0	0	0	0	0	Blood Group Biosynthesis	Heme
FUT15g	0	0	0	0	0	0	Blood Group Biosynthesis	Heme
FUT16g	0	0	0	0	0	0	Blood Group Biosynthesis	Heme
FUT17g	0	0	0	0	0	0	Blood Group Biosynthesis	Heme
FUT18g	0	0	0	0	0	0	Blood Group Biosynthesis	Heme
FUT31g	0	0	0	0	0	0	Blood Group Biosynthesis	Heme
FUT32g	0	0	0	0	0	0	Blood Group Biosynthesis	Heme
FUT33g	0	0	0	0	0	0	Blood Group Biosynthesis	Heme
FUT34g	0	0	0	0	0	0	Blood Group Biosynthesis	Heme
FUT35g	0	0	0	0	0	0	Blood Group Biosynthesis	Heme
FUT910g	0	0	0	0	0	0	Blood Group Biosynthesis	Heme
FUT911g	0	0	0	0	0	0	Blood Group Biosynthesis	Heme
FUT91g	0	0	0	0	0	0	Blood Group Biosynthesis	Heme
FUT92g	0	0	0	0	0	0	Blood Group Biosynthesis	Heme
FUT93g	0	0	0	0	0	0	Blood Group Biosynthesis	Heme
FUT94g	0	0	0	0	0	0	Blood Group Biosynthesis	Heme
FUT95g	0	0	0	0	0	0	Blood Group Biosynthesis	Heme
FUT96g	0	0	0	0	0	0	Blood Group Biosynthesis	Heme
FUT97g	0	0	0	0	0	0	Blood Group Biosynthesis	Heme
FUT98g	0	0	0	0	0	0	Blood Group Biosynthesis	Heme
FUT99g	0	0	0	0	0	0	Blood Group Biosynthesis	Heme
G12MT1_L	0	0.0113377	0.00566884	0	0.0348071	0.0174035	Blood Group Biosynthesis	Heme
G12MT1_U	0	0.0113377	0.00566884	0	0.0348071	0.0174035	N-Glycan Biosynthesis	Glycosylation
G12MT2_L	0	0.0113377	0.00566884	0	0.0348071	0.0174035	N-Glycan Biosynthesis	Glycosylation
G12MT2_U	0	0.0113377	0.00566884	0	0.0348071	0.0174035	N-Glycan Biosynthesis	Glycosylation
G13MT_L	0	0.0113377	0.00566884	0	0.0348071	0.0174035	N-Glycan Biosynthesis	Glycosylation
G13MT_U	0	0.0113377	0.00566884	0	0.0348071	0.0174035	N-Glycan Biosynthesis	Glycosylation
G14T10g	0	0	0	0	0	0	N-Glycan Biosynthesis	Glycosylation
G14T11g	0	0	0	0	0	0	Keratan sulfate biosynthesis	Glycosylation
G14T12g	0	0	0	0	0	0	Keratan sulfate biosynthesis	Glycosylation
G14T13g	0	0	0	0	0	0	Keratan sulfate biosynthesis	Glycosylation
G14T14g	0	0	0	0	0	0	Keratan sulfate biosynthesis	Glycosylation
G14T15g	0	0	0	0	0	0	Keratan sulfate biosynthesis	Glycosylation
G14T16g	0	0	0	0	0	0	Keratan sulfate biosynthesis	Glycosylation
G14T17g	0	0	0	0	0	0	Keratan sulfate biosynthesis	Glycosylation
G14T18g	0	0	0	0	0	0	Keratan sulfate biosynthesis	Glycosylation
G14T19g	0	0	0	0	0	0	Keratan sulfate biosynthesis	Glycosylation
G14T20g	0	0	0	0	0	0	Keratan sulfate biosynthesis	Glycosylation
G14T21g	0	0	0	0	0	0	Keratan sulfate biosynthesis	Glycosylation
G14T2g	0	0.00756134	0.00378067	0	0.0232136	0.0116068	Keratan sulfate biosynthesis	Glycosylation
G14T3g	0	0.00756134	0.00378067	0	0.0232136	0.0116068	Keratan sulfate biosynthesis	Glycosylation
G14T4g	0	0.00756134	0.00378067	0	0.0232136	0.0116068	Keratan sulfate biosynthesis	Glycosylation
G14T5g	0	0.00756134	0.00378067	0	0.0232136	0.0116068	Keratan sulfate biosynthesis	Glycosylation
G14T6g	0	0	0	0	0	0	Keratan sulfate biosynthesis	Glycosylation
G14T7g	0	0	0	0	0	0	Keratan sulfate biosynthesis	Glycosylation
G14T8g	0	0	0	0	0	0	Keratan sulfate biosynthesis	Glycosylation
G14T9g	0	0	0	0	0	0	Keratan sulfate biosynthesis	Glycosylation
G14Tg	0	0	0	0	0	0	Keratan sulfate biosynthesis	Glycosylation
G16MT_L	0	0.0113377	0.00566884	0	0.0348071	0.0174035	N-Glycan Biosynthesis	Glycosylation
G16MT_U	0	0.0113377	0.00566884	0	0.0348071	0.0174035	N-Glycan Biosynthesis	Glycosylation
G1M6MASNB1terg	0	0	0	0	0	0	N-Glycan Biosynthesis	Glycosylation
G1M7MASNBterg	0	0	0	0	0	0	N-Glycan Biosynthesis	Glycosylation
G1M7MASNCterg	0	0	0	0	0	0	N-Glycan Biosynthesis	Glycosylation
G1M8MASNterg	0	0	0	0	0	0	N-Glycan Biosynthesis	Glycosylation
G2M8MASNterg	0	0	0	0	0	0	N-Glycan Biosynthesis	Glycosylation
G3M8MASNterg	0	0	0	0	0	0	N-Glycan Biosynthesis	Glycosylation
G3PD1	-0.546432	-0.00251454	-0.274473	-0.984672	0	-0.492336	N-Glycan Biosynthesis	Glycosylation
G3PD2m	0	0.543918	0.271959	0	0.912724	0.456362	Glycerophospholipid Metabolism	Lipids
G5SADrm	0.00935737	0.425947	0.217652	0.00444609	1.27817	0.641307	Glycolysis/Gluconeogenesis	Central Metabolism
G5SADs	0	0	0	0	0	0	Arginine and Proline Metabolism	Amino Acids
G5SDym	0	0.410991	0.205495	0	1.26176	0.630878	Urea cycle/amino group metabolism	Amino Acids
G6PDA	0	0.379999	0.19	0	1.04398	0.521992	Urea cycle/amino group metabolism	Amino Acids
G6PDH1er	0	1.70529	0.852647	0	1.70529	0.852647	Aminosugar Metabolism	Glycosylation
G6PDH1rer	0	-1.70642	-0.853212	0	-1.70529	-0.852647	Pentose Phosphate Pathway	Central Metabolism
G6PDH2r	0	0.36514	0.18257	0	0.612194	0.306097	Pentose Phosphate Pathway	Central Metabolism
G6PDH2rer	0	0.00113008	0.000565042	0	0	0	Pentose Phosphate Pathway	Central Metabolism
G6PPer	0	0.328792	0.164396	0	1.00941	0.504703	Pentose Phosphate Pathway	Central Metabolism
G6Pter	0	0.328792	0.164396	0	1.00941	0.504703	Glycolysis/Gluconeogenesis	Central Metabolism
GABAVESSEC	0	0.328792	0.164396	0	1.00941	0.504703	Transport, Endoplasmic Reticular	Transport
GACMTRc	0	0.046052	0.023026	0	0.0420461	0.021023	Transport, Extracellular	Transport
GACPAILter	0	0	0	0	0	0	Urea cycle/amino group metabolism	Amino Acids
GALACGLCGALGBSIDEte	0	0	0	0	0	0	Transport, Endoplasmic Reticular	Transport
GALASE10ly	0	0	0	0	0	0	Transport, Extracellular	Transport
GALASE11ly	0	0	0	0	0	0	Keratan sulfate degradation	Glycosylation
GALASE12ly	0	0	0	0	0	0	Keratan sulfate degradation	Glycosylation
GALASE13ly	0	0	0	0	0	0	Keratan sulfate degradation	Glycosylation
GALASE14ly	0	0	0	0	0	0	Keratan sulfate degradation	Glycosylation
GALASE15ly	0	0	0	0	0	0	Keratan sulfate degradation	Glycosylation
GALASE16ly	0	0.00756134	0.00378067	0	0.0232136	0.0116068	Keratan sulfate degradation	Glycosylation
GALASE17ly	0	0.00756134	0.00378067	0	0.0232136	0.0116068	Keratan sulfate degradation	Glycosylation
GALASE18ly	0	0.00756134	0.00378067	0	0.0232136	0.0116068	Keratan sulfate degradation	Glycosylation
GALASE19ly	0	0.00756134	0.00378067	0	0.0232136	0.0116068	Keratan sulfate degradation	Glycosylation
GALASE1ly	0	0	0	0	0	0	Keratan sulfate degradation	Glycosylation
GALASE20ly	0	0	0	0	0	0	N-Glycan Degradation	Glycosylation
GALASE3ly	0	0	0	0	0	0	Keratan sulfate degradation	Glycosylation
GALASE4ly	0	0	0	0	0	0	Keratan sulfate degradation	Glycosylation
GALASE5ly	0	0	0	0	0	0	Keratan sulfate degradation	Glycosylation
GALASE6ly	0	0	0	0	0	0	Keratan sulfate degradation	Glycosylation
GALASE7ly	0	0	0	0	0	0	Keratan sulfate degradation	Glycosylation
GALASE8ly	0	0	0	0	0	0	Keratan sulfate degradation	Glycosylation
GALASE9ly	0	0	0	0	0	0	Keratan sulfate degradation	Glycosylation
GALC	0	0	0	0	0	0	Keratan sulfate degradation	Glycosylation
GALFUC12GAL14ACGLCGALGLUSIDEte	0	0	0	0	0	0	Sphingolipid Metabolism	Lipids
GALFUC12GAL14ACGLCGALGLUSIDEtg	0	0	0	0	0	0	Transport, Extracellular	Transport
GALFUCGALACGLCGAL14ACGLCGALGLUSIDEte	0	0	0	0	0	0	Transport, Golgi Apparatus	Transport
GALFUCGALACGLCGAL14ACGLCGALGLUSIDEtg	0	0	0	0	0	0	Transport, Extracellular	Transport
GALGALFUCFUCGALACGLCGALACGLCGAL14ACGLCGALGLUSIDEte	0	0	0	0	0	0	Transport, Golgi Apparatus	Transport
GALGALFUCFUCGALACGLCGALACGLCGAL14ACGLCGALGLUSIDEtg	0	0	0	0	0	0	Transport, Extracellular	Transport
GALGALGALTHCRMte	0	0	0	0	0	0	Transport, Golgi Apparatus	Transport
GALGLUSIDEtg	0	0	0	0	0	0	Transport, Extracellular	Transport
GALGLUSIDEtl	0	0	0	0	0	0	Transport, Golgi Apparatus	Transport
GALK	0	0.109597	0.0547987	0	0.336468	0.168234	Transport, Lysosomal	Transport
GALNACT1g	0	0	0	0	0	0	Galactose metabolism	Glycosylation
GALNACT2g	0	0	0	0	0	0	Chondroitin / heparan sulfate biosynthesis	Glycosylation
GALNACT3g	0	0	0	0	0	0	Chondroitin / heparan sulfate biosynthesis	Glycosylation
GALNACT4g	0	0	0	0	0	0	Chondroitin / heparan sulfate biosynthesis	Glycosylation
GALNACT5g	0	0	0	0	0	0	Chondroitin / heparan sulfate biosynthesis	Glycosylation
GALNTg	0	0.00756134	0.00378067	0	0.0232136	0.0116068	Chondroitin / heparan sulfate biosynthesis	Glycosylation
GALOR	0	0	0	0	0	0	O-Glycan Biosynthesis	Glycosylation
GALSIDEtl	0	0	0	0	0	0	Galactose metabolism	Glycosylation
GALT	0	0	0	0	0	0	Transport, Lysosomal	Transport
GALt1r	0	0	0	0	0	0	Galactose metabolism	Glycosylation
GALt2_2	0	0	0	0	0	0	Transport, Extracellular	Transport
GALT2g	0	0	0	0	0	0	Transport, Extracellular	Transport
GALt4	0	0	0	0	0	0	Chondroitin / heparan sulfate biosynthesis	Glycosylation
GALt4_2	0	0	0	0	0	0	Transport, Extracellular	Transport
GALTg	0	0	0	0	0	0	Transport, Extracellular	Transport
GALtly	0	0.0378067	0.0189034	0	0.116068	0.058034	Chondroitin / heparan sulfate biosynthesis	Glycosylation
GALU	0.156798	0.202166	0.179482	0	0.139282	0.0696408	Transport, Lysosomal	Transport
GAMt1r	0	0	0	0	0	0	Galactose metabolism	Glycosylation
GAMYe	0	0	0	0	0	0	Transport, Extracellular	Transport
GAO1	0	0	0	0	0	0	Starch and Sucrose Metabolism	Glycogen
GAO1g	0	0	0	0	0	0	Sphingolipid Metabolism	Lipids
GAO2	0	0	0	0	0	0	Sphingolipid Metabolism	Lipids
GAO2g	0	0	0	0	0	0	Sphingolipid Metabolism	Lipids
GAPD	-0.0232111	0.215875	0.096332	-0.174409	0.510245	0.167918	Sphingolipid Metabolism	Lipids
GARFT	0.00347723	0.03039	0.0169336	0.0100065	0.0329135	0.02146	Glycolysis/Gluconeogenesis	Central Metabolism
GASNASE2ly	0	0.0113377	0.00566884	0	0.0348071	0.0174035	IMP Biosynthesis	Nucleotides
GASNASE3ly	0	0	0	0	0	0	N-Glycan Degradation	Glycosylation
GASNASEly	0	0	0	0	0	0	Keratan sulfate degradation	Glycosylation
GBA	0	0.109597	0.0547987	0	0.336468	0.168234	N-Glycan Degradation	Glycosylation
GBAl	0	0	0	0	0	0	Sphingolipid Metabolism	Lipids
GBGT1	0	0	0	0	0	0	Sphingolipid Metabolism	Lipids
GBSIDEte	0	0	0	0	0	0	Sphingolipid Metabolism	Lipids
GBSIDEtl	0	0	0	0	0	0	Transport, Extracellular	Transport
GCALDD	0	0	0	0	0	0	Transport, Lysosomal	Transport
GCALDDm	0	0	0	0	0	0	Glyoxylate and Dicarboxylate Metabolism	Central Metabolism
GCC2am	0	0.129594	0.0647969	0	0.213491	0.106745	Glyoxylate and Dicarboxylate Metabolism	Central Metabolism
GCC2bim	0	0.129594	0.0647969	0	0.213491	0.106745	Glycine, Serine, and Threonine Metabolism	Amino Acids
GCC2cm	0	0.129594	0.0647969	0	0.213491	0.106745	Glycine, Serine, and Threonine Metabolism	Amino Acids
GCCam	0	0.129594	0.0647969	0	0.213491	0.106745	Glycine, Serine, and Threonine Metabolism	Amino Acids
GCCbim	0	0.129594	0.0647969	0	0.213491	0.106745	Glycine, Serine, and Threonine Metabolism	Amino Acids
GCCcm	0	0.129594	0.0647969	0	0.213491	0.106745	Glycine, Serine, and Threonine Metabolism	Amino Acids
GCHOLAt	-10	0.332375	-4.83381	-10	0.468778	-4.76561	Glycine, Serine, and Threonine Metabolism	Amino Acids
GCHOLAt2	0	0	0	0	0	0	Transport, Extracellular	Transport
GCHOLAt3	0	0.328792	0.164396	0	1.00941	0.504703	Transport, Extracellular	Transport
GCHOLAte	10	-0.0316189	4.98419	10	0.674271	5.33714	Transport, Extracellular	Transport
GCHOLAtx	0	0	0	0	0	0	Transport, Extracellular	Transport
GCNTg	0	0	0	0	0	0	Transport, Peroxisomal	Transport
GD1B2te	0	0	0	0	0	0	Blood Group Biosynthesis	Heme
GD1B2tg	0	0	0	0	0	0	Transport, Extracellular	Transport
GD1Cte	0	0	0	0	0	0	Transport, Golgi Apparatus	Transport
GD1Ctg	0	0	0	0	0	0	Transport, Extracellular	Transport
GDCHOLAte	0	0	0	0	0	0	Transport, Golgi Apparatus	Transport
GDPFUCtg	0	0	0	0	0	0	Transport, Extracellular	Transport
GDPtg	0	0	0	0	0	0	Transport, Golgi Apparatus	Transport
GF6PTA	0	0.379999	0.19	0	1.04398	0.521992	Transport, Golgi Apparatus	Transport
GFUCS	0	0	0	0	0	0	Aminosugar Metabolism	Glycosylation
GGH-10FTHF5GLUe	0	0	0	0	0	0	Fructose and Mannose Metabolism	Glycosylation
GGH-10FTHF5GLUl	0	0.0821981	0.0410991	0	0.252351	0.126176	Folate Metabolism	Vitamins
GGH-10FTHF6GLUe	0	0	0	0	0	0	Folate Metabolism	Vitamins
GGH-10FTHF6GLUl	0	0.0657585	0.0328792	0	0.201881	0.100941	Folate Metabolism	Vitamins
GGH-10FTHF7GLUe	0	0	0	0	0	0	Folate Metabolism	Vitamins
GGH-10FTHF7GLUl	0	0.0547987	0.0273994	0	0.168234	0.0841171	Folate Metabolism	Vitamins
GGH-5DHFe	0	0	0	0	0	0	Folate Metabolism	Vitamins
GGH-5DHFl	0	0.0821981	0.0410991	0	0.252351	0.126176	Folate Metabolism	Vitamins
GGH-5THFe	0	0	0	0	0	0	Folate Metabolism	Vitamins
GGH-5THFl	0	0.0821981	0.0410991	0	0.252351	0.126176	Folate Metabolism	Vitamins
GGH-6DHFe	0	0	0	0	0	0	Folate Metabolism	Vitamins
GGH-6DHFl	0	0.0657585	0.0328792	0	0.201881	0.100941	Folate Metabolism	Vitamins
GGH-6THFe	0	0	0	0	0	0	Folate Metabolism	Vitamins
GGH-6THFl	0	0.0657585	0.0328792	0	0.201881	0.100941	Folate Metabolism	Vitamins
GGH-7DHFe	0	0	0	0	0	0	Folate Metabolism	Vitamins
GGH-7DHFl	0	0.0547987	0.0273994	0	0.168234	0.0841171	Folate Metabolism	Vitamins
GGH-7THFe	0	0	0	0	0	0	Folate Metabolism	Vitamins
GGH-7THFl	0	0.0547987	0.0273994	0	0.168234	0.0841171	Folate Metabolism	Vitamins
GGLUCT	0	0.109597	0.0547987	0	0.336468	0.168234	Folate Metabolism	Vitamins
GGNG	0.0142544	0.0315593	0.0229068	0	0.0531266	0.0265633	Glutathione Metabolism	ROS
GGT_L	0	0	0	0	0	0	Starch and Sucrose Metabolism	Glycogen
GGT_U	0	0	0	0	0	0	N-Glycan Biosynthesis	Glycosylation
GGT5r	0	0	0	0	0	0	N-Glycan Biosynthesis	Glycosylation
GGT6	0	0	0	0	0	0	Eicosanoid Metabolism	UFAS
GHMT2r	0.0133832	0.167143	0.0902632	0.0229035	0.268217	0.14556	Eicosanoid Metabolism	UFAS
GHMT2rm	0	0	0	0	0	0	Glycine, Serine, and Threonine Metabolism	Amino Acids
GHMT3	0	0	0	0	0	0	Glycine, Serine, and Threonine Metabolism	Amino Acids
GHMT3m	0	0	0	0	0	0	Lysine Metabolism	Amino Acids
GK1	0	0.16538	0.0826899	0.00509688	0.509799	0.257448	Lysine Metabolism	Amino Acids
GK1m	0	0	0	0	0	0	Nucleotides	Nucleotides
GLACO	0	0	0	0	0	0	Nucleotides	Nucleotides
GLACOm	0	0	0	0	0	0	Ascorbate and Aldarate Metabolism	Vitamins
GLACter	-0.0102067	0	-0.00510336	-0.0651862	0	-0.0325931	Ascorbate and Aldarate Metabolism	Vitamins
GLAl	0	0	0	0	0	0	Transport, Endoplasmic Reticular	Transport
GLB1	0	0	0	0	0	0	Sphingolipid Metabolism	Lipids
GLBRAN	0.0142544	0.0315593	0.0229068	0	0.0531266	0.0265633	Sphingolipid Metabolism	Lipids
GLCAASE1ly	0	0	0	0	0	0	Starch and Sucrose Metabolism	Glycogen
GLCAASE4ly	0	0	0	0	0	0	Heparan sulfate degradation	Glycosylation
GLCAASE5ly	0	0	0	0	0	0	Chondroitin sulfate degradation	Glycosylation
GLCAASE6ly	0	0	0	0	0	0	Chondroitin sulfate degradation	Glycosylation
GLCAASE7ly	0	0	0	0	0	0	Chondroitin sulfate degradation	Glycosylation
GLCAASE8ly	0	0.0347351	0.0173675	0	0.0995499	0.0497749	Chondroitin sulfate degradation	Glycosylation
GLCAASE9ly	0	0.0347351	0.0173675	0	0.0995499	0.0497749	Hyaluronan Metabolism	Glycosylation
GLCAE2g	0	0	0	0	0	0	Hyaluronan Metabolism	Glycosylation
GLCAT2g	0	0	0	0	0	0	Chondroitin / heparan sulfate biosynthesis	Glycosylation
GLCAT3g	0	0	0	0	0	0	Chondroitin / heparan sulfate biosynthesis	Glycosylation
GLCAT4g	0	0	0	0	0	0	Chondroitin / heparan sulfate biosynthesis	Glycosylation
GLCAT5g	0	0	0	0	0	0	Chondroitin / heparan sulfate biosynthesis	Glycosylation
GLCAT6g	0	0	0	0	0	0	Chondroitin / heparan sulfate biosynthesis	Glycosylation
GLCAT7g	0	0	0	0	0	0	Chondroitin / heparan sulfate biosynthesis	Glycosylation
GLCAT8g	0	0	0	0	0	0	Chondroitin / heparan sulfate biosynthesis	Glycosylation
GLCAT9g	0	0	0	0	0	0	Chondroitin / heparan sulfate biosynthesis	Glycosylation
GLCATg	0	0	0	0	0	0	Chondroitin / heparan sulfate biosynthesis	Glycosylation
GLCMter	0	0	0	0	0	0	Chondroitin / heparan sulfate biosynthesis	Glycosylation
GLCNACASE1ly	0	0	0	0	0	0	Transport, Extracellular	Transport
GLCNACASE2ly	0	0	0	0	0	0	Heparan sulfate degradation	Glycosylation
GLCNACASE3ly	0	0	0	0	0	0	Heparan sulfate degradation	Glycosylation
GLCNACASE4ly	0	0	0	0	0	0	Heparan sulfate degradation	Glycosylation
GLCNACASE5ly	0	0	0	0	0	0	Heparan sulfate degradation	Glycosylation
GLCNACDASg	0	0	0	0	0	0	Heparan sulfate degradation	Glycosylation
GLCNACPT_L	0	0.0113377	0.00566884	0	0.0348071	0.0174035	Chondroitin / heparan sulfate biosynthesis	Glycosylation
GLCNACPT_U	0	0.0113377	0.00566884	0	0.0348071	0.0174035	N-Glycan Biosynthesis	Glycosylation
GLCNACT_L	0	0.0113377	0.00566884	0	0.0348071	0.0174035	N-Glycan Biosynthesis	Glycosylation
GLCNACT_U	0	0.0113377	0.00566884	0	0.0348071	0.0174035	N-Glycan Biosynthesis	Glycosylation
GLCNACT1g	0	0	0	0	0	0	N-Glycan Biosynthesis	Glycosylation
GLCNACT2g	0	0	0	0	0	0	Chondroitin / heparan sulfate biosynthesis	Glycosylation
GLCNACT3g	0	0	0	0	0	0	Chondroitin / heparan sulfate biosynthesis	Glycosylation
GLCNACT4g	0	0	0	0	0	0	Chondroitin / heparan sulfate biosynthesis	Glycosylation
GLCNACT5g	0	0	0	0	0	0	Chondroitin / heparan sulfate biosynthesis	Glycosylation
GLCt1r	0	0	0	0	0	0	Chondroitin / heparan sulfate biosynthesis	Glycosylation
GLCt2_2	0.2718	0.2718	0.2718	0.2718	0.2718	0.2718	Transport, Extracellular	Transport
GLCt2r	0	0	0	0	0	0	Transport, Extracellular	Transport
GLCt4	0	0	0	0	0	0	Transport, Extracellular	Transport
GLCt4_2	0	0	0	0	0	0	Transport, Extracellular	Transport
GLCter	-0.328792	0	-0.164396	-1.00941	0	-0.504703	Transport, Extracellular	Transport
GLCtg	0	0.109597	0.0547987	0	0.336468	0.168234	Transport, Endoplasmic Reticular	Transport
GLCtly	0	0	0	0	0	0	Transport, Golgi Apparatus	Transport
GLCURter	0	0.126626	0.0633129	0	0.346955	0.173478	Transport, Lysosomal	Transport
GLCURtly	-0.0694701	0	-0.0347351	-0.1991	0	-0.0995499	Transport, Endoplasmic Reticular	Transport
GLDBRAN	0	0.0173049	0.00865243	0	0.0531266	0.0265633	Transport, Lysosomal	Transport
GLGNS1	0.0142544	0.0315593	0.0229068	0	0.0531266	0.0265633	Starch and Sucrose Metabolism	Glycogen
GLNALANaEx	0	0	0	0	0	0	Starch and Sucrose Metabolism	Glycogen
GLNASNNaEx	0	0	0	0	0	0	Transport, Extracellular	Transport
GLNCYSNaEx	0	0	0	0	0	0	Transport, Extracellular	Transport
GLNLASEer	-0.113051	0	-0.0565254	-0.557144	0	-0.278572	Transport, Extracellular	Transport
GLNS	0	0.328792	0.164396	0	1.00941	0.504703	Ascorbate and Aldarate Metabolism	Vitamins
GLNSERNaEx	0	0	0	0	0	0	Glutamate metabolism	Amino Acids
GLNt4	0	0	0	0	0	0	Transport, Extracellular	Transport
GLNTHRNaEx	0	0	0	0	0	0	Transport, Extracellular	Transport
GLNtm	0	0.202208	0.101104	0	0.494958	0.247479	Transport, Extracellular	Transport
GLNtN1	0.0765	0.0865	0.0815	0.0765	0.0865	0.0815	Transport, Mitochondrial	Transport
GLPASE1	0	0.0173049	0.00865243	0	0.0531266	0.0265633	Transport, Extracellular	Transport
GLPASE2	0	0.0173049	0.00865243	0	0.0531266	0.0265633	Starch and Sucrose Metabolism	Glycogen
GLRASE	-0.188313	0	-0.0941565	-0.559051	0	-0.279525	Starch and Sucrose Metabolism	Glycogen
GLU5Km	0	0.410991	0.205495	0	1.26176	0.630878	Ascorbate and Aldarate Metabolism	Vitamins
GLUCYS	0	0.110179	0.0550894	0	0.336974	0.168487	Urea cycle/amino group metabolism	Amino Acids
GLUDxm	-4.70637	4.4962	-0.105083	-4.9989	4.4962	-0.251348	Glutathione Metabolism	ROS
GLUDym	-4.70637	4.4962	-0.105083	-4.9989	4.4962	-0.251348	Glutamate metabolism	Amino Acids
GluForTx	0	0.00584639	0.0029232	0	0.00611477	0.00305738	Glutamate metabolism	Amino Acids
GLUNm	0	0.202208	0.101104	0	0.494958	0.247479	Histidine Metabolism	Amino Acids
GLUPRT	0.00347723	0.03039	0.0169336	0.0100065	0.0329135	0.02146	Glutamate metabolism	Amino Acids
GLUt2m	-0.432347	0.304219	-0.064064	-1.03508	0.980906	-0.027087	IMP Biosynthesis	Nucleotides
GLUt6	0	0.328792	0.164396	0	1.00941	0.504703	Transport, Mitochondrial	Transport
GLUt7l	0	0.328792	0.164396	0	1.00941	0.504703	Transport, Extracellular	Transport
GLUTCOADHm	0	0	0	0	0	0	Transport, Lysosomal	Transport
GLUtr	0	0	0	0	0	0	Tryptophan metabolism	Amino Acids
GLUVESSEC	0	0.328792	0.164396	0	1.00941	0.504703	Transport, Endoplasmic Reticular	Transport
GLXO1	0	0	0	0	0	0	Transport, Extracellular	Transport
GLXtm	0	0	0	0	0	0	Glyoxylate and Dicarboxylate Metabolism	Central Metabolism
GLXtp	0	0	0	0	0	0	Transport, Mitochondrial	Transport
GLYAMDTRc	0	0.046052	0.023026	0	0.0420461	0.021023	Transport, Peroxisomal	Transport
GLYATm	0	0	0	0	0	0	Urea cycle/amino group metabolism	Amino Acids
GLYBt4(2)r	-0.0262582	0	-0.0131291	-0.0775663	0	-0.0387831	Glycine, Serine, and Threonine Metabolism	Amino Acids
GLYBtm	0	0.0262582	0.0131291	0	0.0775663	0.0387831	Transport, Extracellular	Transport
GLYC-St	0	0	0	0	0	0	Transport, Mitochondrial	Transport
GLYC3Ptm	0	0	0	0	0	0	Transport, Extracellular	Transport
GLYCK2	0	0	0	0	0	0	Transport, Mitochondrial	Transport
GLYCLTDy	0	0	0	0	0	0	Glyoxylate and Dicarboxylate Metabolism	Central Metabolism
GLYCLTtp	0	0	0	0	0	0	Glyoxylate and Dicarboxylate Metabolism	Central Metabolism
GLYCt	0	0.239086	0.119543	0	0.634268	0.317134	Transport, Peroxisomal	Transport
GLYCtm	0	0	0	0	0	0	Transport, Extracellular	Transport
GLYK	0	0	0	0	0	0	Transport, Mitochondrial	Transport
GLYKm	0	0	0	0	0	0	Glycerophospholipid Metabolism	Lipids
GLYOX	0	0.144324	0.0721619	0	0.47444	0.23722	Glycerophospholipid Metabolism	Lipids
GLYOXm	0	0	0	0	0	0	Pyruvate Metabolism	Central Metabolism
GLYt2r	-0.0881977	0.89654	0.404171	-0.0121999	2.98329	1.48555	Pyruvate Metabolism	Central Metabolism
GLYt2rL	0	0	0	0	0	0	Transport, Extracellular	Transport
GLYt4	0	0	0	0	0	0	Transport, Lysosomal	Transport
GLYt7(211)r	0.0665876	0.0665876	0.0665876	0.0121999	0.044924	0.0285619	Transport, Extracellular	Transport
GLYt7(311)r	0	0	0	0	0	0	Transport, Extracellular	Transport
GLYtm	0	0.129594	0.0647969	0	0.213491	0.106745	Transport, Extracellular	Transport
GLYtp	0	0	0	0	0	0	Transport, Mitochondrial	Transport
GLYVESSEC	0	0.328792	0.164396	0	1.00941	0.504703	Transport, Peroxisomal	Transport
GMAND	0	0	0	0	0	0	Transport, Extracellular	Transport
GMPR	0	0.126666	0.0633332	0	0.347995	0.173997	Fructose and Mannose Metabolism	Glycosylation
GMPS2	0.00158324	0.12825	0.0649165	0.00509688	0.353092	0.179094	Nucleotides	Nucleotides
GMPtg	0	0	0	0	0	0	Nucleotides	Nucleotides
GMPtn	-0.136997	0	-0.0684984	-0.420586	0	-0.210293	Transport, Golgi Apparatus	Transport
GND	0	0.36514	0.18257	0	0.612194	0.306097	Transport, Nuclear	Transport
GNDer	0	0	0	0	0	0	Pentose Phosphate Pathway	Central Metabolism
GNMT	0	0	0	0	0	0	Pentose Phosphate Pathway	Central Metabolism
GP1CALPHAte	0	0	0	0	0	0	Glycine, Serine, and Threonine Metabolism	Amino Acids
GP1CALPHAtg	0	0	0	0	0	0	Transport, Extracellular	Transport
GP1Cte	0	0	0	0	0	0	Transport, Golgi Apparatus	Transport
GP1Ctg	0	0	0	0	0	0	Transport, Extracellular	Transport
GPAM_hs	0.00227379	0.0131221	0.00769793	0	0.32198	0.16099	Transport, Golgi Apparatus	Transport
GPAMm_hs	0	0	0	0	0	0	Triacylglycerol Synthesis	Lipids
GPDDA1	0	0.164396	0.0821981	0	0.504703	0.252351	Triacylglycerol Synthesis	Lipids
GPIAT	0	0	0	0	0	0	Glycerophospholipid Metabolism	Lipids
GPIMTer_L	0	0	0	0	0	0	Glycosylphosphatidylinositol (GPI)-anchor biosynthesis	Glycosylation
GPIMTer_U	0	0	0	0	0	0	Glycosylphosphatidylinositol (GPI)-anchor biosynthesis	Glycosylation
GQ1BALPHAte	0	0	0	0	0	0	Glycosylphosphatidylinositol (GPI)-anchor biosynthesis	Glycosylation
GQ1BALPHAtg	0	0	0	0	0	0	Transport, Extracellular	Transport
GQ1Bte	0	0	0	0	0	0	Transport, Golgi Apparatus	Transport
GQ1Btg	0	0	0	0	0	0	Transport, Extracellular	Transport
GRTT	0	0	0	0	0	0	Transport, Golgi Apparatus	Transport
GRTTx	0.00113008	0.0121053	0.00661769	0	0.033212	0.016606	Cholesterol Metabolism	Steriods
GSNKm	0	0	0	0	0	0	Cholesterol Metabolism	Steriods
GSNt	-0.000580278	0	-0.000290139	0	0	0	Nucleotides	Nucleotides
GSNt4	0	0	0	0	0	0	Transport, Extracellular	Transport
GSNt5	0	0	0	0	0	0	Transport, Extracellular	Transport
GSNtl	0	0	0	0	0	0	Transport, Extracellular	Transport
GSNtm	0	0	0	0	0	0	Transport, Lysosomal	Transport
GT1Ate	0	0	0	0	0	0	Transport, Mitochondrial	Transport
GT1Atg	0	0	0	0	0	0	Transport, Extracellular	Transport
GTHDH	0	0.410991	0.205495	0	0.606733	0.303366	Transport, Golgi Apparatus	Transport
GTHO	0	0.159093	0.0795466	0	0.45505	0.227525	Ascorbate and Aldarate Metabolism	Vitamins
GTHOm	0	0.145056	0.0725278	0	0.445326	0.222663	Glutamate metabolism	Amino Acids
GTHP	-0.410991	0.149451	-0.13077	-0.606733	0.303366	-0.151683	Glutamate metabolism	Amino Acids
GTHPe	0	0	0	0	0	0	Glutathione Metabolism	ROS
GTHPm	0	0.145056	0.0725278	0	0.445326	0.222663	Glutathione Metabolism	ROS
GTHRDt	0	0	0	0	0	0	Glutathione Metabolism	ROS
GTHRDtr	0	0	0	0	0	0	Glutathione Metabolism	ROS
GTHS	0	0.110179	0.0550894	0	0.336974	0.168487	Transport, Endoplasmic Reticular	Transport
GTMLTe	0	0.110179	0.0550894	0	0.336974	0.168487	Glutathione Metabolism	ROS
GTPCI	0	0	0	0	0	0	Glutathione Metabolism	ROS
GTPCIn	0	0	0	0	0	0	Tetrahydrobiopterin	Vitamins
GTPtn	0	0	0	0	0	0	Tetrahydrobiopterin	Vitamins
GUACYC	0	0.164396	0.0821981	0	0.504703	0.252351	Transport, Nuclear	Transport
GUAD	0	0	0	0	0	0	Nucleotides	Nucleotides
GUAPRT	0	0.164977	0.0824883	0	0.504703	0.252351	Purine Catabolism	Nucleotides
GUAt	-0.0215302	0	-0.0107651	-0.0183256	0	-0.0091628	Salvage Pathway	Nucleotides
GULLACter	0	0.034246	0.017123	0	0	0	Transport, Extracellular	Transport
GULN3D	0	0.126626	0.0633129	0	0.346955	0.173478	Transport, Endoplasmic Reticular	Transport
GULNDer	-0.00798478	0.126626	0.0593206	0	0.346955	0.173478	Pentose and Glucuronate Interconversions	Central Metabolism
GULNter	0	0.126626	0.0633129	0	0.346955	0.173478	Pentose and Glucuronate Interconversions	Central Metabolism
GUR1PP	0	0.0935002	0.0467501	0	0.260933	0.130467	Transport, Endoplasmic Reticular	Transport
H2CO3D	-9.99663	0.701529	-4.64755	-9.98999	1.36459	-4.3127	Pentose and Glucuronate Interconversions	Central Metabolism
H2CO3D2	-0.701529	9.99663	4.64755	-1.36459	9.98999	4.3127	Miscellaneous	Misc
H2CO3D2m	0	0	0	0	0	0	Miscellaneous	Misc
H2ETer	0	0	0	0	0	0	Miscellaneous	Misc
H2MTer_L	0	0	0	0	0	0	Glycosylphosphatidylinositol (GPI)-anchor biosynthesis	Glycosylation
H2MTer_U	0	0	0	0	0	0	Glycosylphosphatidylinositol (GPI)-anchor biosynthesis	Glycosylation
H2O2t	-0.153457	0.410991	0.128767	-0.435489	0.606733	0.0856222	Glycosylphosphatidylinositol (GPI)-anchor biosynthesis	Glycosylation
H2O2tly	0	0.159093	0.0795466	0	0.45505	0.227525	Transport, Extracellular	Transport
H2O2tm	-0.594531	1.23297	0.319221	-0.606733	1.8202	0.606733	Transport, Lysosomal	Transport
H2O2tn	-0.117426	0	-0.0587129	-0.360502	0	-0.180251	Transport, Mitochondrial	Transport
H2O2tp	-0.410991	1.23297	0.410991	-0.606733	1.8202	0.606733	Transport, Nuclear	Transport
H2Ot	-10.5605	-10.4093	-10.4849	-10.4937	-10.3363	-10.415	Transport, Peroxisomal	Transport
H2Oter	-0.188747	0.508089	0.159671	-0.560261	1.06165	0.250695	Transport, Extracellular	Transport
H2Otg	0	0.164396	0.0821981	0	0.504703	0.252351	Transport, Endoplasmic Reticular	Transport
H2Otly	-0.318186	0.328792	0.0053031	-0.910099	1.00941	0.0496529	Transport, Golgi Apparatus	Transport
H2Otm	-1.30105	-1.10763	-1.20434	0.104597	-0.51866	-0.207031	Transport, Lysosomal	Transport
H2Otn	-0.514174	0	-0.257087	-1.06165	0	-0.530826	Transport, Mitochondrial	Transport
H2Otp	-1.23297	0.166721	-0.533125	-1.8202	0.506724	-0.656738	Transport, Nuclear	Transport
H3ETer	0	0	0	0	0	0	Transport, Peroxisomal	Transport
H3MTer_L	0	0	0	0	0	0	Glycosylphosphatidylinositol (GPI)-anchor biosynthesis	Glycosylation
H3MTer_U	0	0	0	0	0	0	Glycosylphosphatidylinositol (GPI)-anchor biosynthesis	Glycosylation
H4ETer	0	0	0	0	0	0	Glycosylphosphatidylinositol (GPI)-anchor biosynthesis	Glycosylation
H5MTer_L	0	0	0	0	0	0	Glycosylphosphatidylinositol (GPI)-anchor biosynthesis	Glycosylation
H5MTer_U	0	0	0	0	0	0	Glycosylphosphatidylinositol (GPI)-anchor biosynthesis	Glycosylation
H6ET2er	0	0	0	0	0	0	Glycosylphosphatidylinositol (GPI)-anchor biosynthesis	Glycosylation
H6ETer	0	0	0	0	0	0	Glycosylphosphatidylinositol (GPI)-anchor biosynthesis	Glycosylation
H6MTer_L	0	0	0	0	0	0	Glycosylphosphatidylinositol (GPI)-anchor biosynthesis	Glycosylation
H6MTer_U	0	0	0	0	0	0	Glycosylphosphatidylinositol (GPI)-anchor biosynthesis	Glycosylation
H7ET2er	0	0	0	0	0	0	Glycosylphosphatidylinositol (GPI)-anchor biosynthesis	Glycosylation
H7ETer	0	0	0	0	0	0	Glycosylphosphatidylinositol (GPI)-anchor biosynthesis	Glycosylation
H7MTer_L	0	0	0	0	0	0	Glycosylphosphatidylinositol (GPI)-anchor biosynthesis	Glycosylation
[truncated: 1,395 more rows]

## Sheet: References
References
[1] Zielinski, D. C., Filipp, F. V., Bordbar, A., Jensen, K., Smith, J. W., Herrgard, M. J., et al. (2015). Pharmacogenomic and clinical data link non-pharmacokinetic metabolic dysregulation to drug side effect pathogenesis. Nature Communications, 6, 7101. http://doi.org/10.1038/ncomms8101
